# Supplementary material for: Design, Synthesis, and Evaluation of B-(Trifluoromethyl)phenyl Phosphine–Borane Derivatives as Novel Progesterone Receptor Antagonists
Source: MDPI journal article supplement (doi:10.3390/molecules29071587), 2024-04-02

# Design, Synthesis, and Evaluation of *B*-(Trifluoromethyl)phenyl Phosphine–Borane Derivatives as Novel Progesterone Receptor Antagonists

Yu Miyajima, Kotaro Ochiai, Shinya Fujii

## Supplementary Materials

### 1. Supplementary Figures

Figure S1

Table S1

### 2. $^1\text{H}$ , $^{13}\text{C}$ , $^{11}\text{B}$ , $^{19}\text{F}$ and $^{31}\text{P}$ NMR Spectra of synthesized compounds

**Figure S1.** T47D Alkaline phosphatase assay of test compounds alone. None of the synthesized compounds alone affected the alkaline phosphatase activity.

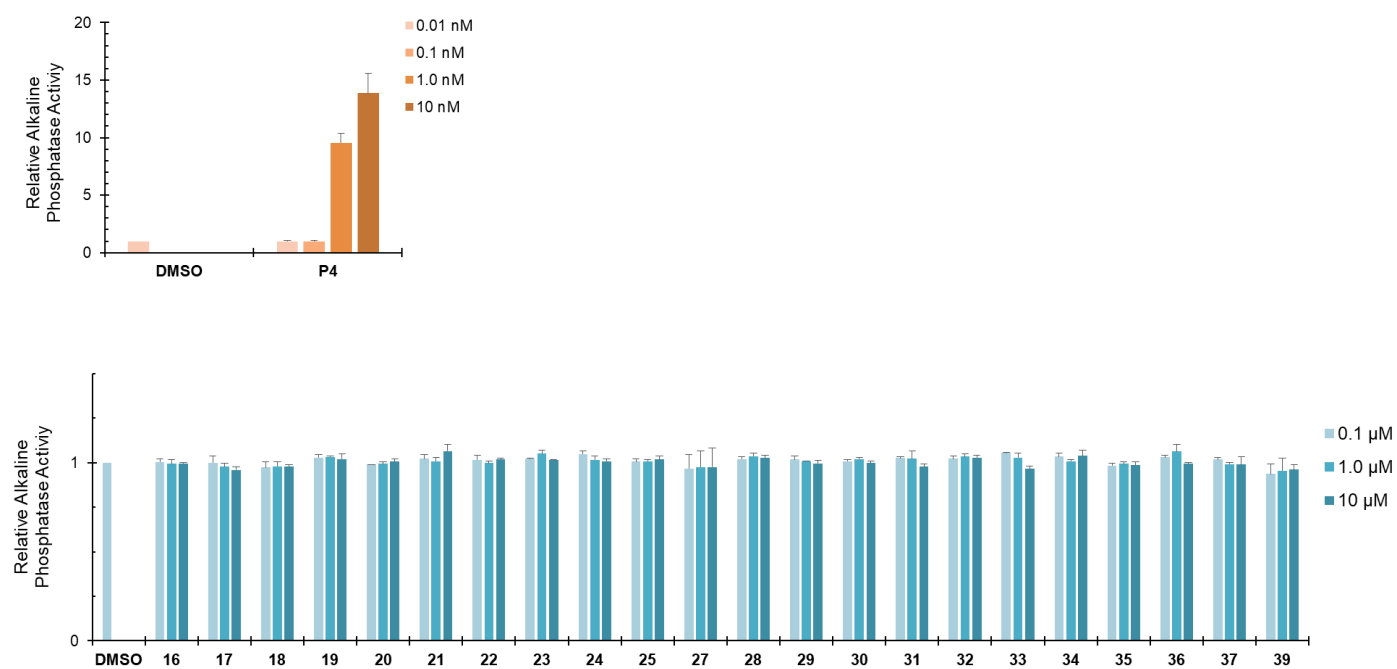

**Table S1.** Cell proliferation-promoting/inhibitory activity of compounds **28** and **34** toward androgen-dependent SC-3 cells. Both of the compounds did not exhibit cell proliferation promoting activity as well as inhibitory activity toward androgen-dependent cell proliferation.

| Cmpd                | EC <sub>50</sub> (agonist) <sup>a</sup> | IC <sub>50</sub> (antagonist) <sup>b</sup> |
|---------------------|-----------------------------------------|--------------------------------------------|
| Dihydrotestosterone | 0.12 nM                                 | N.D.                                       |
| Hydroxyflutamide    | N.A.                                    | 0.37 $\mu$ M                               |
| <b>28</b>           | N.A.                                    | N.A.                                       |
| <b>34</b>           | N.A.                                    | N.A.                                       |

<sup>a</sup> Agonistic activity was evaluated by induction of cell-proliferation by single a treatment of the compound.

<sup>b</sup> Antagonistic activity was evaluated by inhibitory activity toward 1 nM-DHT promoted cell proliferation.

N.A. no activity in the concentration range of 0.01  $\mu$ M to 10  $\mu$ M.

N.D. not determined.

**Procedure of SC-3 assay.** SC-3 cells were cultured in MEM $\alpha$  (Fujifilm Wako Co.) supplemented with 2 % FBS and 1 nM dihydrotestosterone (DHT) at 37 °C under 5 % CO<sub>2</sub>. All experiments were per-formed in triplicate or more. Cells were trypsinized and diluted to 20,000 cells/mL with DMEM supplemented with 2 % charcoal-stripped FBS. This cell suspension was seeded in 96-well plates at a volume of 90  $\mu$ L per well and incubated at 24 h. Then, 10  $\mu$ L of the drug solution, which was supplemented with serial dilutions of the test compounds or DMSO as a dilution control in the presence of 1 nM DHT, was added. The plates were incubated at 37 °C under 5 % CO<sub>2</sub> for 3 days, and the cell number was determined using a Cell Counting Kit-8 (DOJINDO). A 10  $\mu$ L aliquot of WST-8 was added to each well, and the cells were further incubated for 2 h, then the absorbance at 450 nm was determined with a microplate reader as a measure of the number of living cells in the culture.

3CF3PhBH2PMe3

## B-3-(Trifluoromethyl)phenyl trimethylphosphine-borane (16)

## IBB-nmr Analysis

NAME Mar12-2022  
 EXPNO 1  
 PROCNO 1  
 Date\_ 20220312  
 Time\_ 21.51  
 INSTRUM av400  
 PROBHD 5 mm PABBO BB-  
 PULPROG zg30  
 TD 65536  
 SOLVENT DMSO  
 NS 16  
 DS 2  
 SWH 8223.685 Hz  
 FIDRES 0.125483 Hz  
 AQ 3.9846387 sec  
 RG 203  
 DW 60.800 usec  
 DE 6.50 usec  
 TE 296.7 K  
 D1 1.00000000 sec  
 TD0 1

===== CHANNEL f1 =====  
 NUC1 1H  
 P1 14.00 usec  
 PL1 -1.80 dB  
 PL1W 14.82738590 W  
 SFO1 400.1324710 MHz  
 SI 32768  
 SF 400.1300034 MHz  
 WDW EM  
 SSB 0  
 LB 0.30 Hz  
 GB 0  
 PC 1.00

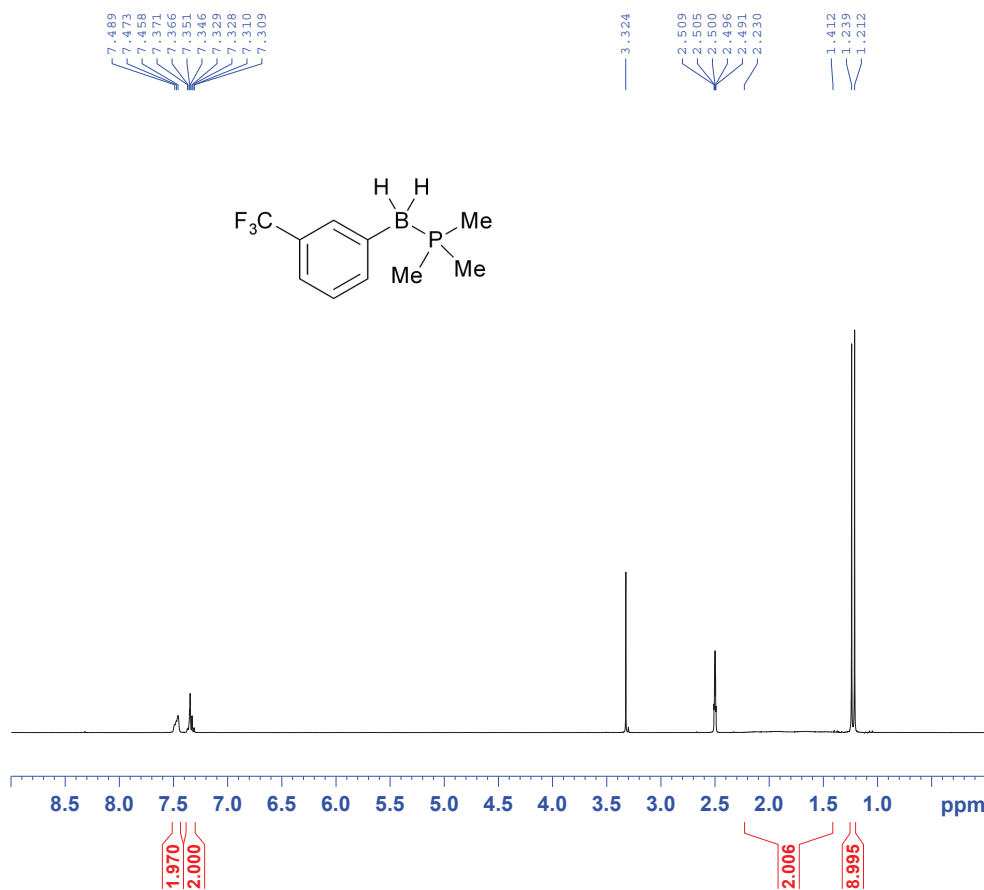

3CF3PhBH2PMe3

## IBB-nmr Analysis

NAME Mar07-2024  
 EXPNO 5  
 PROCNO 1  
 Date\_ 20240307  
 Time\_ 23.44  
 INSTRUM av500  
 PROBHD 5 mm CPDCH 13C  
 PULPROG zgpg30  
 TD 65536  
 SOLVENT CDCl<sub>3</sub>  
 NS 256  
 DS 4  
 SWH 30030.029 Hz  
 FIDRES 0.458222 Hz  
 AQ 1.0912410 sec  
 RG 35.9  
 DW 16.650 usec  
 DE 20.00 usec  
 TE 298.1 K  
 D1 2.00000000 sec  
 D11 0.03000000 sec  
 TD0 1

===== CHANNEL f1 =====  
 NUC1 13C  
 P1 10.00 usec  
 PL1 -5.00 dB  
 PL1W 14.29790783 W  
 SFO1 125.7703643 MHz

===== CHANNEL f2 =====  
 CPDPRG2 waltz16  
 NUC2 1H  
 PCPD2 80.00 usec  
 PL2 -4.00 dB  
 PL12 14.06 dB  
 PL13 17.00 dB  
 PL2W 6.30857365 W  
 PL12W 0.09862794 W  
 PL13W 0.05011872 W  
 SFO2 500.1320005 MHz  
 SI 32768  
 SF 125.7577946 MHz  
 WDW EM  
 SSB 0  
 LB 1.00 Hz  
 GB 0  
 PC 0.30

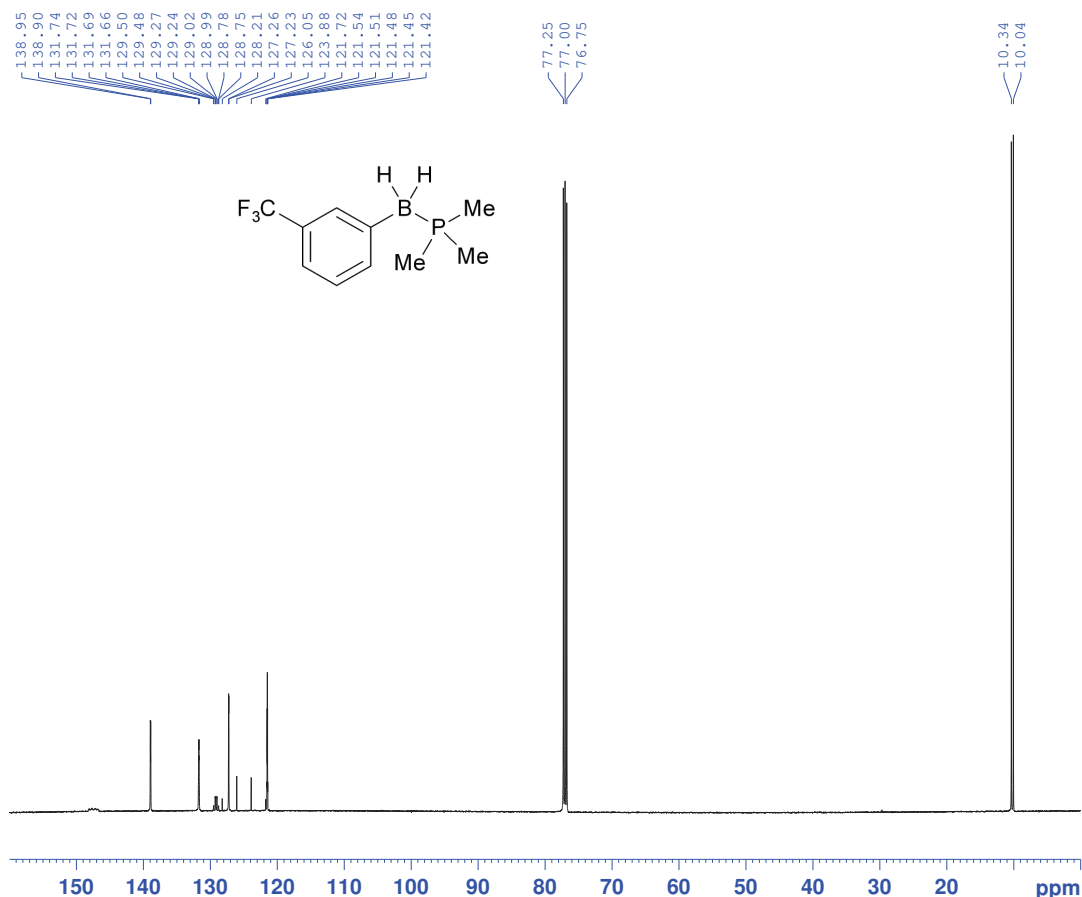



3CF3PhBH2PMe3

## IBB-nmr Analysis

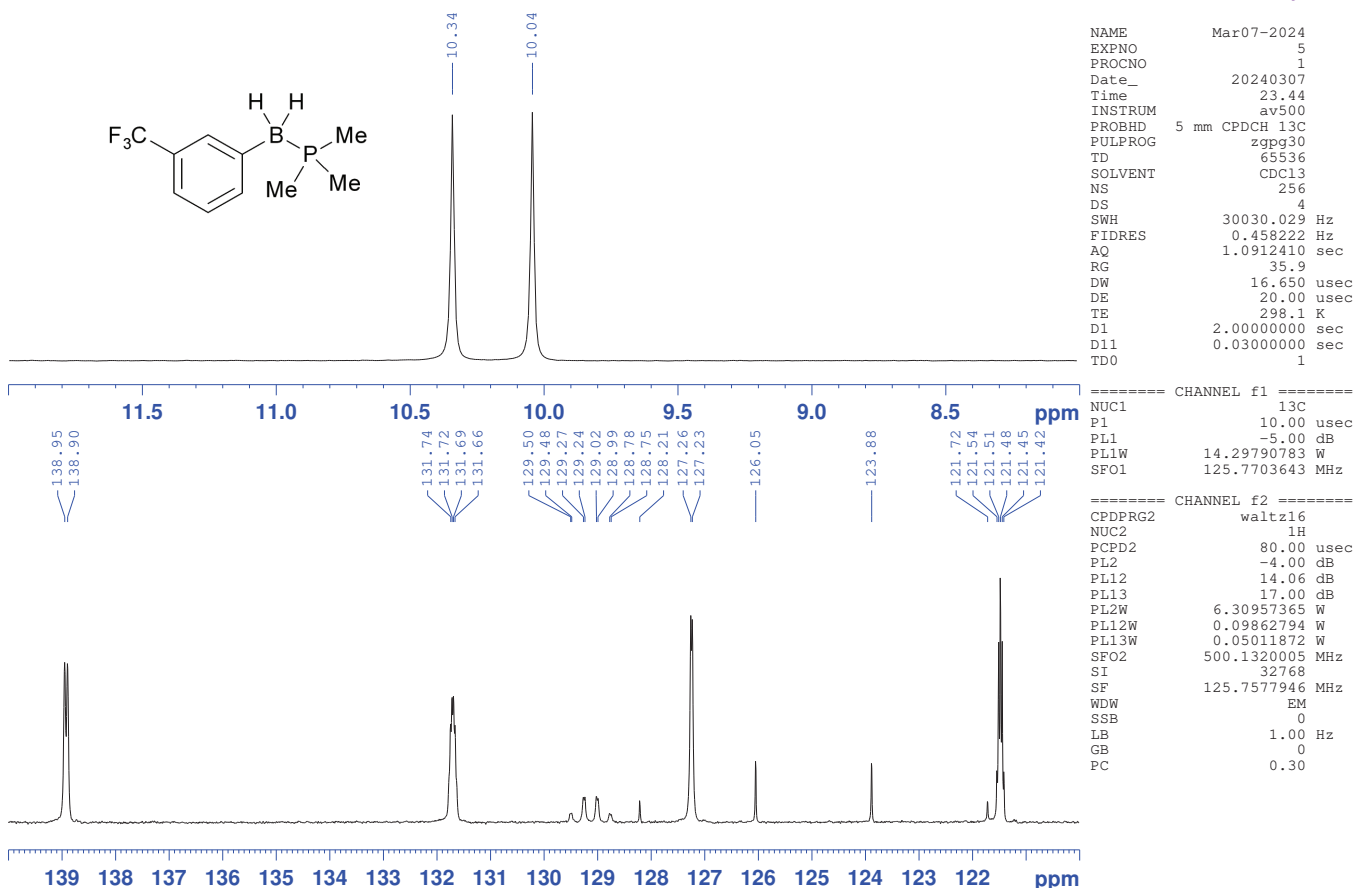

3CF3PhBH2PMe3

## IBB-nmr Analysis

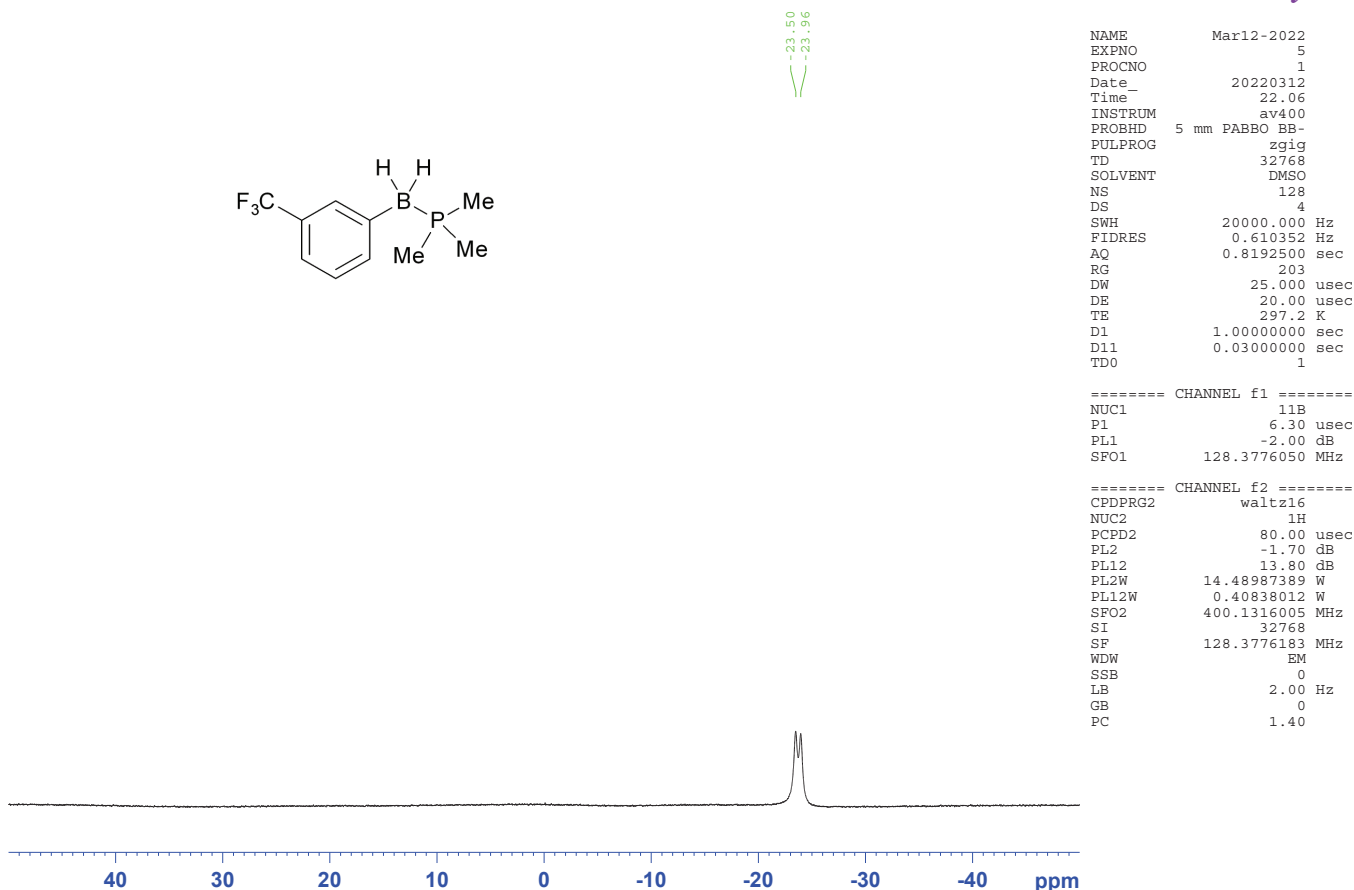

3CF3PhBH2PMe3

*IBB-nmr Analysis*

```
NAME           Mar12-2022
EXPNO           2
PROCNO          1
Date_           20220312
Time            21.55
INSTRUM         av400
PROBHD          5 mm PABBO BB-
PULPROG         zgfhigqn
TD              131072
SOLVENT         DMSO
NS               8
DS              4
SWH             89285.711 Hz
FIDRES          0.681196 Hz
AQ              0.7340532 sec
RG              203
DW              5.600 usec
DE              6.50 usec
TE              296.7 K
D1              1.00000000 sec
D11             0.03000000 sec
D12             0.00002000 sec
TD0             1
```

```
===== CHANNEL f1 =====
NUC1            19F
P1              19.50 usec
PL1             -4.00 dB
PL1W            16.40489006 W
SFO1            376.4607164 MHz
```

```
===== CHANNEL f2 =====
CPDPRG2         waltz16
NUC2            1H
PCPD2           112.00 usec
PL2             -4.00 dB
PL12            18.00 dB
PL2W            24.60733604 W
PL12W           0.15526180 W
SFO2            400.1316005 MHz
SI              65536
SF              376.4984617 MHz
WDW             EM
SSB             0
LB              0.30 Hz
GB              0
PC              1.00
```

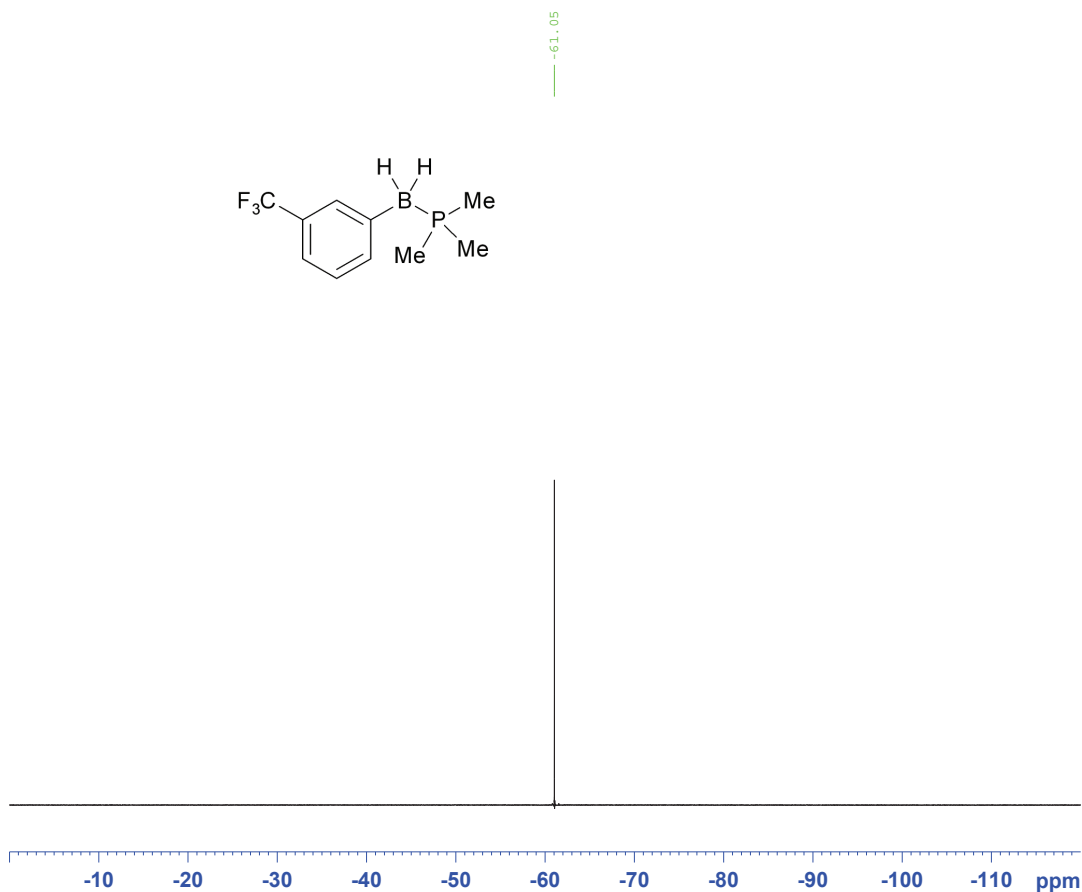

3CF3PhBH2PMe3

*IBB-nmr Analysis*

```
NAME           Mar12-2022
EXPNO           4
PROCNO          1
Date_           20220312
Time            21.58
INSTRUM         av400
PROBHD          5 mm PABBO BB-
PULPROG         zg30
TD              65536
SOLVENT         DMSO
NS               8
DS              4
SWH             64102.563 Hz
FIDRES          0.978127 Hz
AQ              0.5112308 sec
RG              203
DW              7.800 usec
DE              6.50 usec
TE              296.5 K
D1              2.00000000 sec
TD0             1
```

```
===== CHANNEL f1 =====
NUC1            31P
P1              10.00 usec
PL1             -0.70 dB
PL1W            30.10233498 W
SFO1            161.9674942 MHz
SI              32768
SF              161.9754962 MHz
WDW             EM
SSB             0
LB              1.00 Hz
GB              0
PC              1.40
```

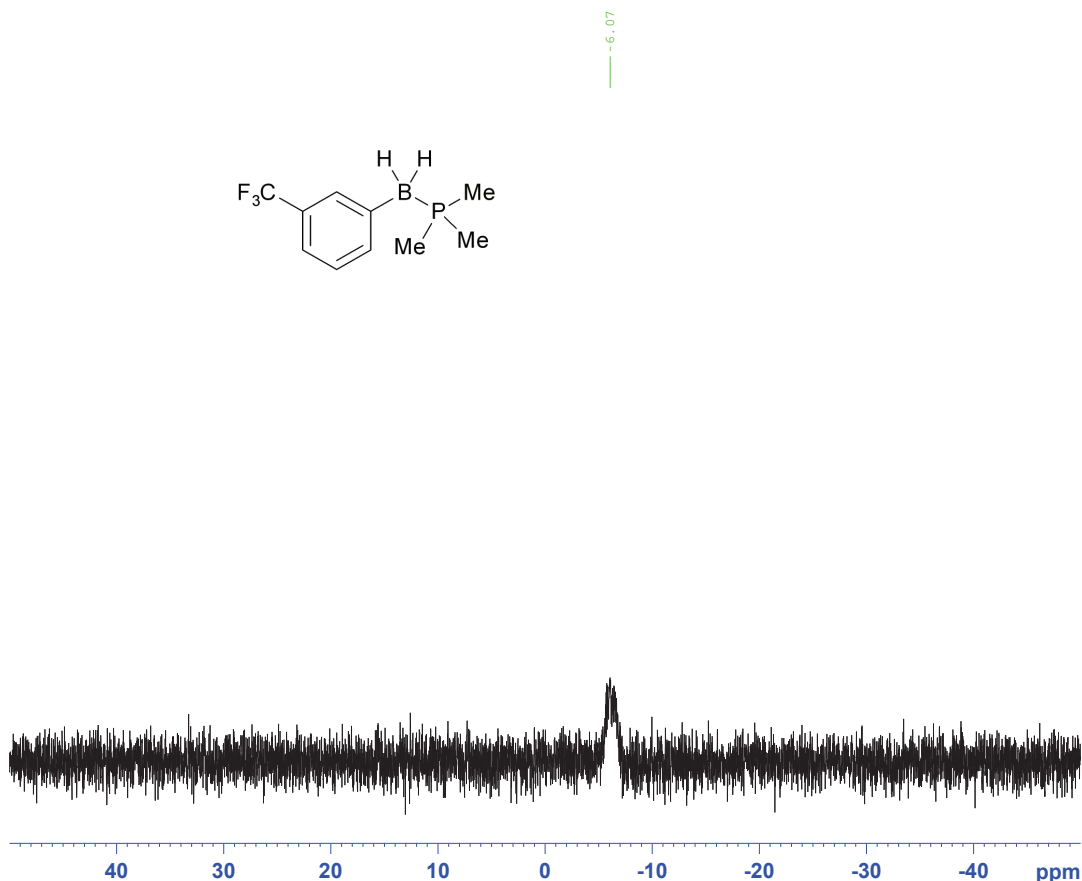

3CF3PhBH2PPhMe2 21-60Fr

B-(3-Trifluoromethyl)phenyl dimethyl(phenyl)phosphine-borane (17)

## IBB-nmr Analysis

NAME Apr14-2022  
 EXPNO 1  
 PROCNO 1  
 Date\_ 20220414  
 Time 21.36  
 INSTRUM av400  
 PROBHD 5 mm PABBO BB-  
 PULPROG zg30  
 TD 65536  
 SOLVENT DMSO  
 NS 16  
 DS 2  
 SWH 8223.685 Hz  
 FIDRES 0.125483 Hz  
 AQ 3.9846387 sec  
 RG 203  
 DW 60.800 usec  
 DE 6.50 usec  
 TE 295.6 K  
 D1 1.00000000 sec  
 TD0 1

===== CHANNEL f1 =====  
 NUC1 1H  
 P1 14.00 usec  
 PL1 -1.80 dB  
 PL1W 14.82738590 W  
 SFO1 400.1324710 MHz  
 SI 32768  
 SF 400.1300038 MHz  
 WDW EM  
 SSB 0  
 LB 0.30 Hz  
 GB 0  
 PC 1.00

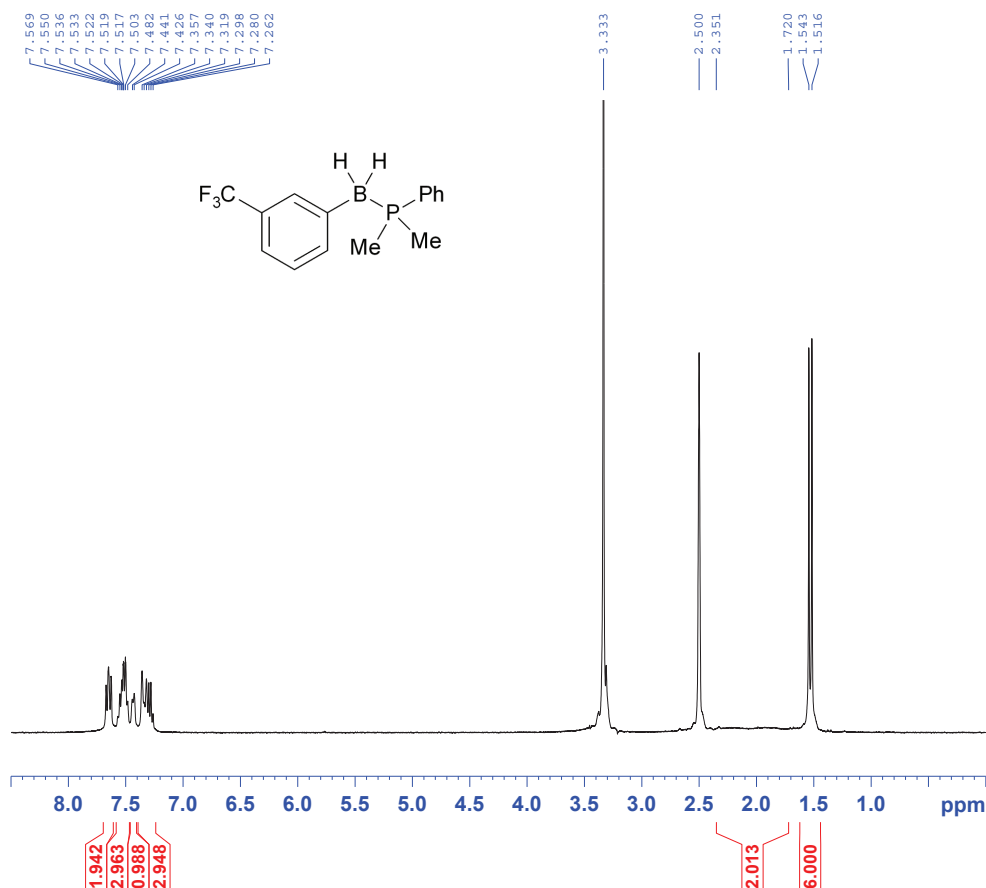

3CF3PhBH2PMe2Ph

## IBB-nmr Analysis

NAME Mar08-2024  
 EXPNO 7  
 PROCNO 1  
 Date\_ 20240308  
 Time 3.33  
 INSTRUM av500  
 PROBHD 5 mm CPDCH 13C  
 PULPROG zgpg30  
 TD 65536  
 SOLVENT CDCl3  
 NS 1024  
 DS 4  
 SWH 30030.029 Hz  
 FIDRES 0.458222 Hz  
 AQ 1.0912410 sec  
 RG 35.9  
 DW 16.650 usec  
 DE 20.00 usec  
 TE 298.1 K  
 D1 2.00000000 sec  
 D11 0.03000000 sec  
 TD0 1

===== CHANNEL f1 =====  
 NUC1 13C  
 P1 10.00 usec  
 PL1 -5.00 dB  
 PL1W 14.29790783 W  
 SFO1 125.7703643 MHz

===== CHANNEL f2 =====  
 CPDPRG2 waltz16  
 NUC2 1H  
 PCPD2 80.00 usec  
 PL2 -4.00 dB  
 PL12 14.06 dB  
 PL13 17.00 dB  
 PL2W 6.30957365 W  
 PL12W 0.09862794 W  
 PL13W 0.05011872 W  
 SFO2 500.1320005 MHz  
 SI 32768  
 SF 125.7577928 MHz  
 WDW EM  
 SSB 0  
 LB 1.00 Hz  
 GB 0  
 PC 0.30

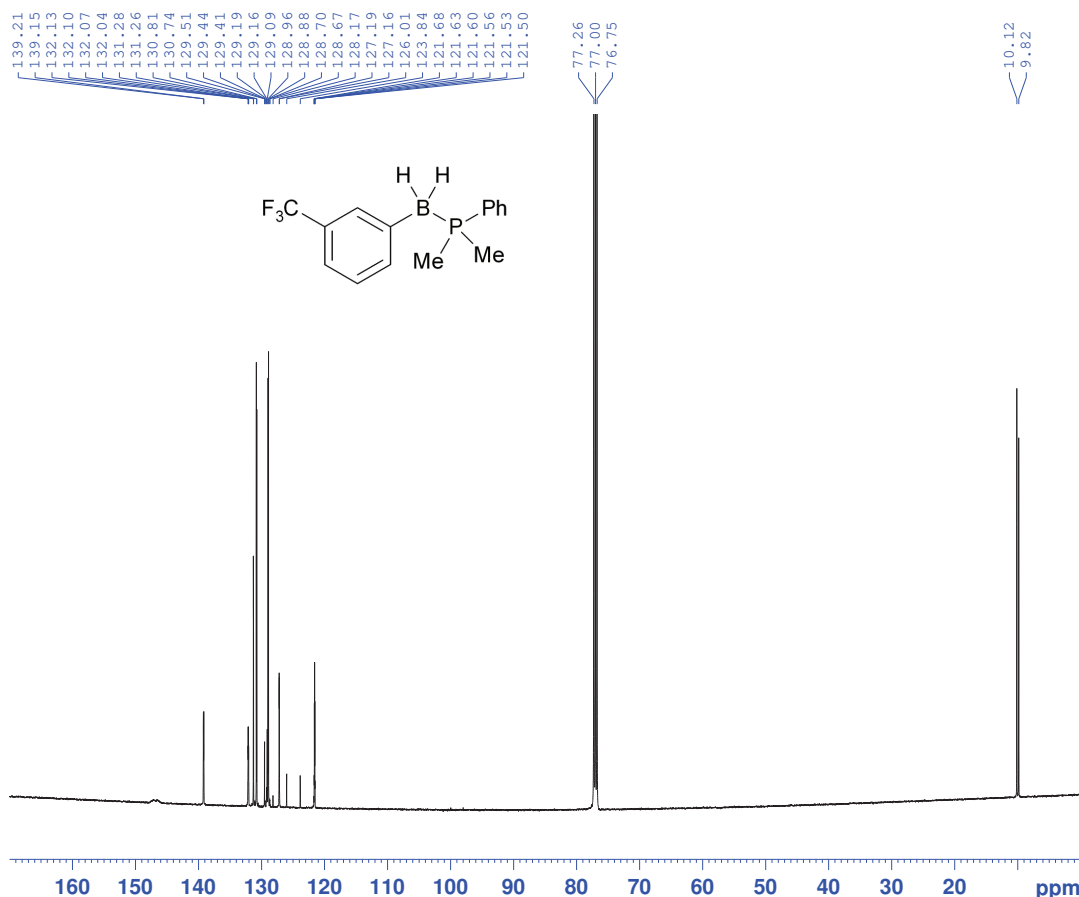

3CF3PhBH2PMe2Ph

## IBB-nmr Analysis

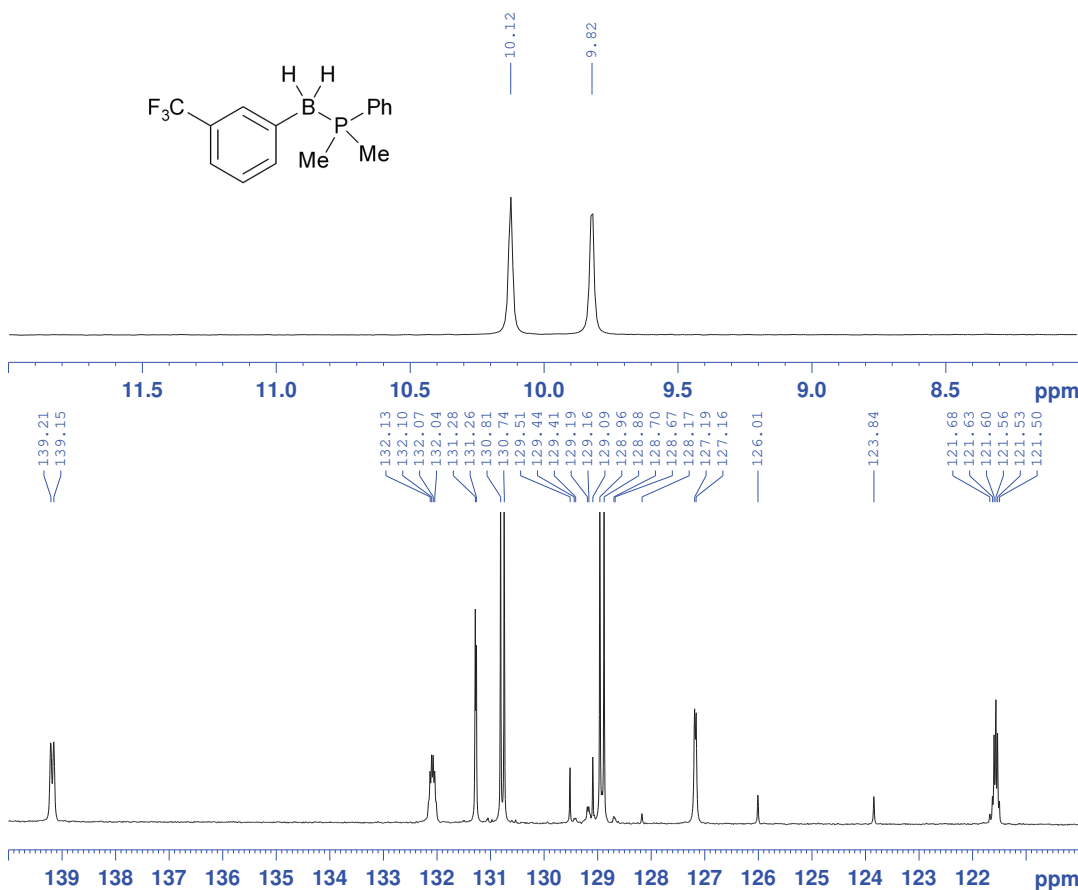

NAME Mar08-2024  
EXPNO 7  
PROCNO 1  
Date\_ 20240308  
Time 3.33  
INSTRUM av500  
PROBHD 5 mm CPDCH 13C  
PULPROG zgpg30  
TD 65536  
SOLVENT CDCl3  
NS 1024  
DS 4  
SWH 30030.029 Hz  
FIDRES 0.458222 Hz  
AQ 1.0912410 sec  
RG 35.9  
DW 16.650 usec  
DE 20.00 usec  
TE 298.1 K  
D1 2.00000000 sec  
D11 0.03000000 sec  
TD0 1

===== CHANNEL f1 =====  
NUC1 13C  
P1 10.00 usec  
PL1 -5.00 dB  
PL1W 14.29790783 W  
SFO1 125.7703643 MHz

===== CHANNEL f2 =====  
CPDPRG2 waltz16  
NUC2 1H  
PCPD2 80.00 usec  
PL2 -4.00 dB  
PL12 14.06 dB  
PL13 17.00 dB  
PL2W 6.30957365 W  
PL12W 0.09862794 W  
PL13W 0.05011872 W  
SFO2 500.1320005 MHz  
SI 32768  
SF 125.7577928 MHz  
WDW EM  
SSB 0  
LB 1.00 Hz  
GB 0  
PC 0.30

3HOPhBH2PMe2Ph

## IBB-nmr Analysis

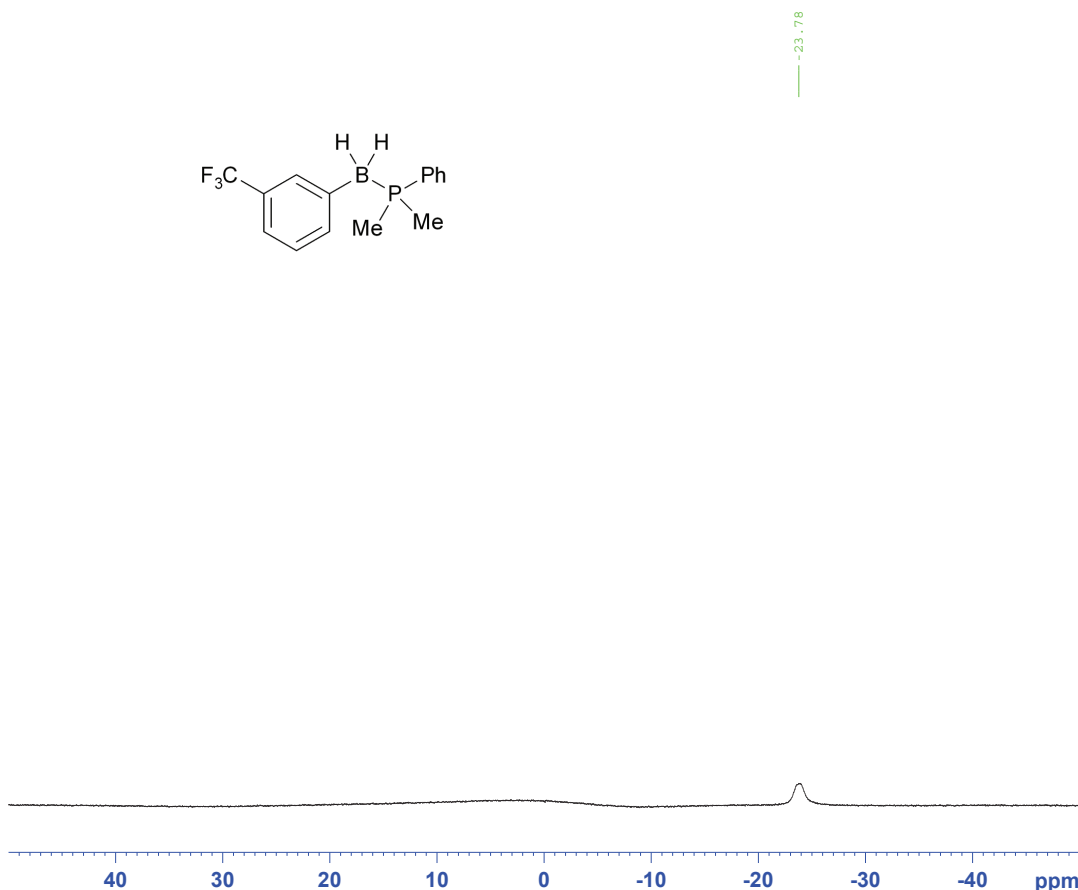

NAME Jul30-2023  
EXPNO 6  
PROCNO 1  
Date\_ 20230730  
Time 13.35  
INSTRUM av400  
PROBHD 5 mm PABBO BB-  
PULPROG zgig  
TD 32768  
SOLVENT DMSO  
NS 128  
DS 4  
SWH 20000.000 Hz  
FIDRES 0.610352 Hz  
AQ 0.8192500 sec  
RG 203  
DW 25.000 usec  
DE 20.00 usec  
TE 297.3 K  
D1 1.00000000 sec  
D11 0.03000000 sec  
TD0 1

===== CHANNEL f1 =====  
NUC1 11B  
P1 6.30 usec  
PL1 -2.00 dB  
SFO1 128.3776050 MHz

===== CHANNEL f2 =====  
CPDPRG2 waltz16  
NUC2 1H  
PCPD2 80.00 usec  
PL2 -1.70 dB  
PL12 13.80 dB  
PL2W 14.48987389 W  
PL12W 0.40838012 W  
SFO2 400.1316005 MHz  
SI 32768  
SF 128.3776183 MHz  
WDW EM  
SSB 0  
LB 2.00 Hz  
GB 0  
PC 1.40

3CF3PhBH2PPhMe2

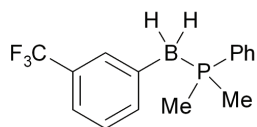

-61.13

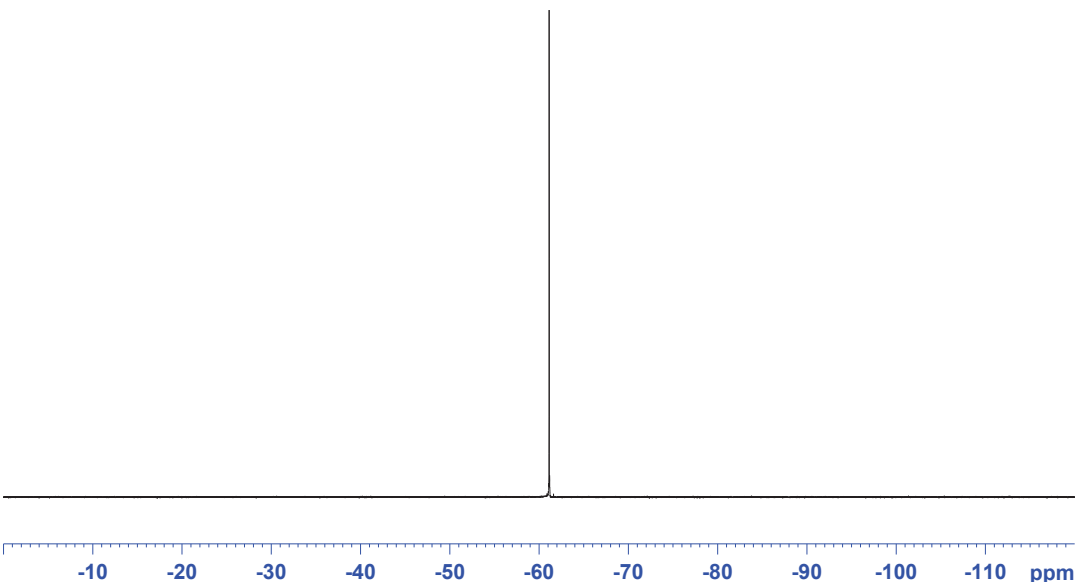

## IBB-nmr Analysis

```

NAME      Apr14-2022
EXPNO     3
PROCNO    1
Date_     20220414
Time      21.45
INSTRUM   av400
PROBHD    5 mm PABBO BB-
PULPROG   zgfhigqn
TD         131072
SOLVENT   DMSO
NS         8
DS         4
SWH        89285.711 Hz
FIDRES     0.681196 Hz
AQ         0.7340532 sec
RG         203
DW         5.600 usec
DE         6.50 usec
TE         295.4 K
D1         1.00000000 sec
D11        0.03000000 sec
D12        0.00002000 sec
TD0        1

```

```

===== CHANNEL f1 =====
NUC1      19F
P1        19.50 usec
PL1       -4.00 dB
PL1W      16.40489006 W
SFO1      376.4607164 MHz

```

```

===== CHANNEL f2 =====
CPDPRG2   waltz16
NUC2       1H
PCPD2     112.00 usec
PL2       -4.00 dB
PL12      18.00 dB
PL2W      24.60733604 W
PL12W     0.15526180 W
SFO2      400.1316005 MHz
SI         65536
SF         376.4984617 MHz
WDW        EM
SSB        0
LB         0.30 Hz
GB         0
PC         1.00

```

3CF3PhBH2PPhMe2 21-60Fr

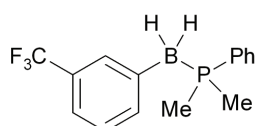

-1.21

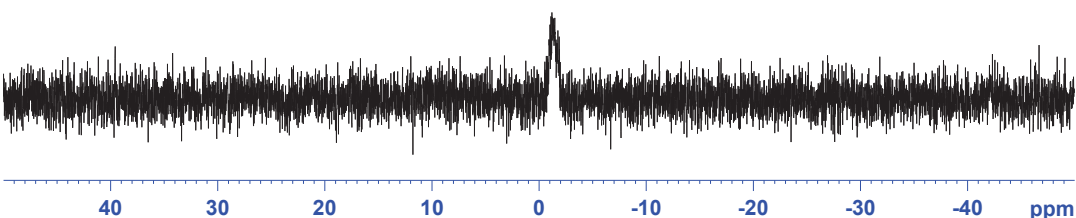

## IBB-nmr Analysis

```

NAME      Apr14-2022
EXPNO     2
PROCNO    1
Date_     20220414
Time      21.41
INSTRUM   av400
PROBHD    5 mm PABBO BB-
PULPROG   zg30
TD         65536
SOLVENT   DMSO
NS         16
DS         4
SWH        64102.563 Hz
FIDRES     0.978127 Hz
AQ         0.5112308 sec
RG         203
DW         7.800 usec
DE         6.50 usec
TE         295.5 K
D1         2.00000000 sec
TD0        1

```

```

===== CHANNEL f1 =====
NUC1      31P
P1        10.00 usec
PL1       -0.70 dB
PL1W      30.10233498 W
SFO1      161.9674942 MHz
SI         32768
SF         161.9754962 MHz
WDW        EM
SSB        0
LB         1.00 Hz
GB         0
PC         1.40

```

3CF3PhBH2PEt3

## B-3-(Trifluoromethyl)phenyl triethylphosphine-borane (18)

## IBB-nmr Analysis

NAME Jan16-2022  
 EXPNO 4  
 PROCNO 1  
 Date\_ 20220116  
 Time\_ 23.53  
 INSTRUM av400  
 PROBHD 5 mm PABBO BB-  
 PULPROG zg30  
 TD 65536  
 SOLVENT DMSO  
 NS 16  
 DS 2  
 SWH 8223.685 Hz  
 FIDRES 0.125483 Hz  
 AQ 3.9846387 sec  
 RG 203  
 DW 60.800 usec  
 DE 6.50 usec  
 TE 296.2 K  
 D1 1.00000000 sec  
 TD0 1

===== CHANNEL f1 =====  
 NUC1 1H  
 P1 14.00 usec  
 PL1 -1.80 dB  
 PL1W 14.82738590 W  
 SFO1 400.1324710 MHz  
 SI 32768  
 SF 400.1300034 MHz  
 WDW EM  
 SSB 0  
 LB 0.30 Hz  
 GB 0  
 PC 1.00

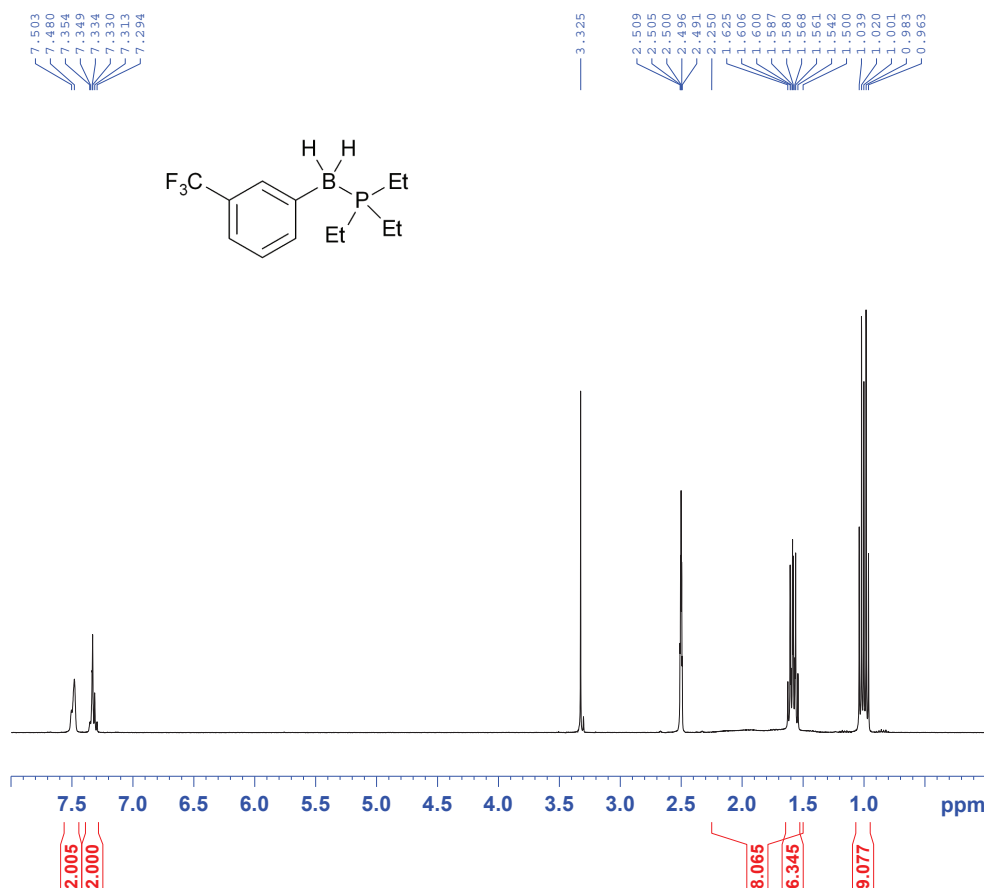

3CF3PhBH2PEt3

## IBB-nmr Analysis

NAME Mar08-2024  
 EXPNO 15  
 PROCNO 1  
 Date\_ 20240308  
 Time\_ 8.30  
 INSTRUM av500  
 PROBHD 5 mm CPDCH 13C  
 PULPROG zgpg30  
 TD 65536  
 SOLVENT CDCl3  
 NS 1024  
 DS 4  
 SWH 30030.029 Hz  
 FIDRES 0.458222 Hz  
 AQ 1.0912410 sec  
 RG 90.5  
 DW 16.650 usec  
 DE 20.00 usec  
 TE 298.0 K  
 D1 2.00000000 sec  
 D11 0.03000000 sec  
 TD0 1

===== CHANNEL f1 =====  
 NUC1 13C  
 P1 10.00 usec  
 PL1 -5.00 dB  
 PL1W 14.29790783 W  
 SFO1 125.7703643 MHz

===== CHANNEL f2 =====  
 CPDPRG2 waltz16  
 NUC2 1H  
 PCPD2 80.00 usec  
 PL2 -4.00 dB  
 PL12 14.06 dB  
 PL13 17.00 dB  
 PL2W 6.30857365 W  
 PL12W 0.09862794 W  
 PL13W 0.05011872 W  
 SFO2 500.1320005 MHz  
 SI 32768  
 SF 125.7577946 MHz  
 WDW EM  
 SSB 0  
 LB 1.00 Hz  
 GB 0  
 PC 0.30

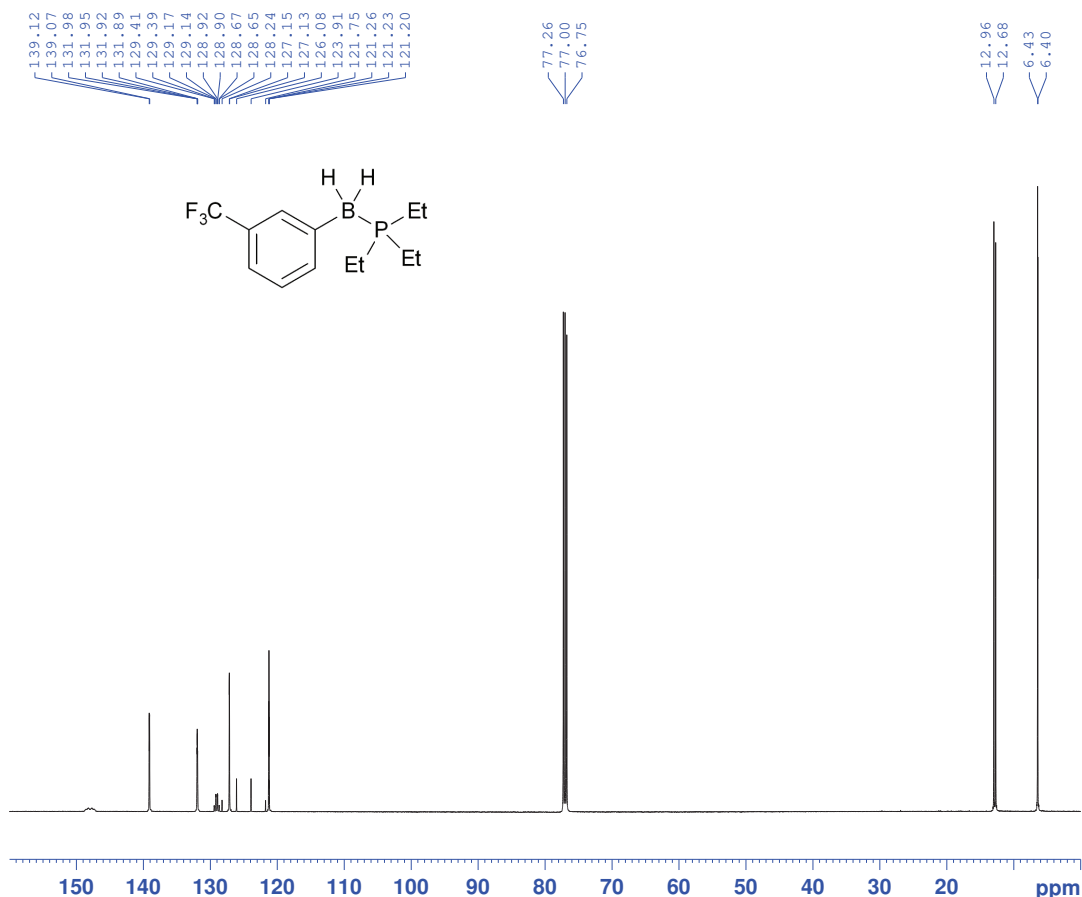

3CF3PhBH2PEt3

## IBB-nmr Analysis

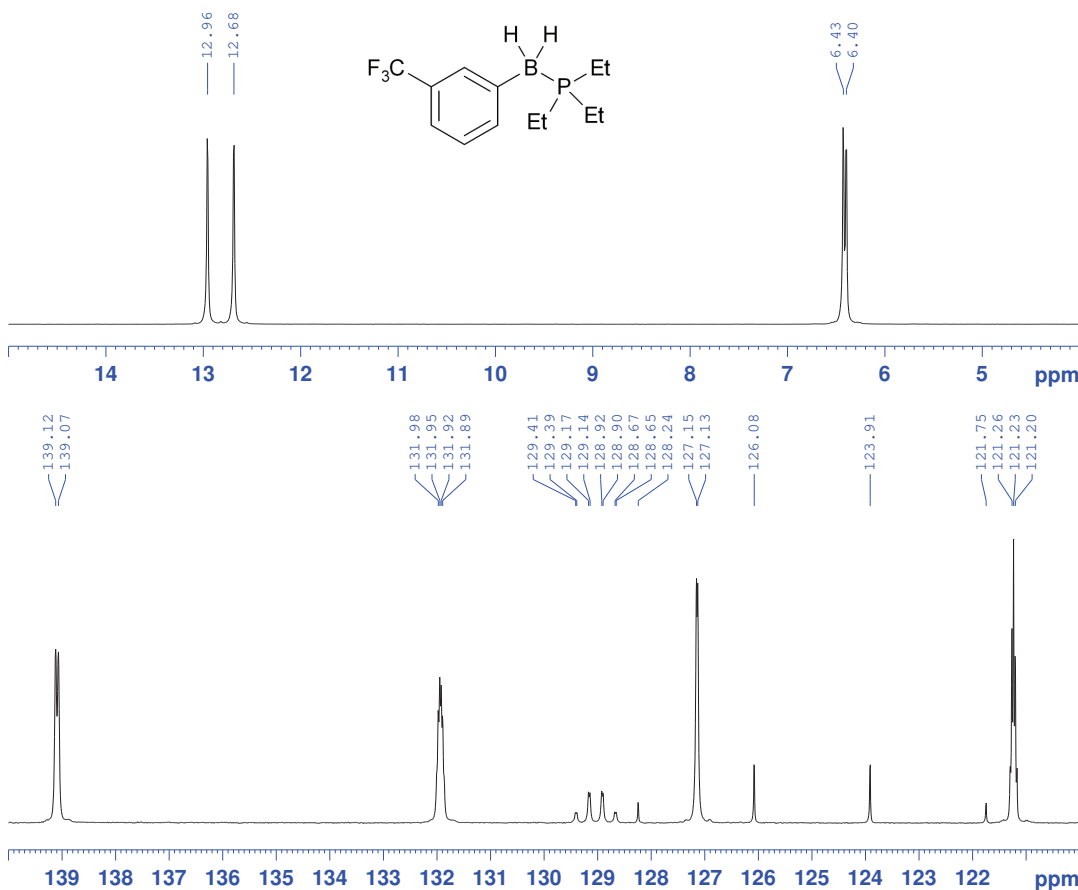

NAME Mar08-2024  
EXPNO 15  
PROCNO 1  
Date\_ 20240308  
Time 8.30  
INSTRUM av500  
PROBHD 5 mm CPDCH 13C  
PULPROG zgpg30  
TD 65536  
SOLVENT CDCl3  
NS 1024  
DS 4  
SWH 30030.029 Hz  
FIDRES 0.458222 Hz  
AQ 1.0912410 sec  
RG 90.5  
DW 16.650 usec  
DE 20.00 usec  
TE 298.0 K  
D1 2.00000000 sec  
D11 0.03000000 sec  
TD0 1

===== CHANNEL f1 =====  
NUC1 13C  
P1 10.00 usec  
PL1 -5.00 dB  
PL1W 14.29790783 W  
SFO1 125.7703643 MHz

===== CHANNEL f2 =====  
CPDPRG2 waltz16  
NUC2 1H  
PCPD2 80.00 usec  
PL2 -4.00 dB  
PL12 14.06 dB  
PL13 17.00 dB  
PL2W 6.30957365 W  
PL12W 0.09862794 W  
PL13W 0.05011872 W  
SFO2 500.1320005 MHz  
SI 32768  
SF 125.7577946 MHz  
WDW EM  
SSB 0  
LB 1.00 Hz  
GB 0  
PC 0.30

3CF3PhBH2PEt3

## IBB-nmr Analysis

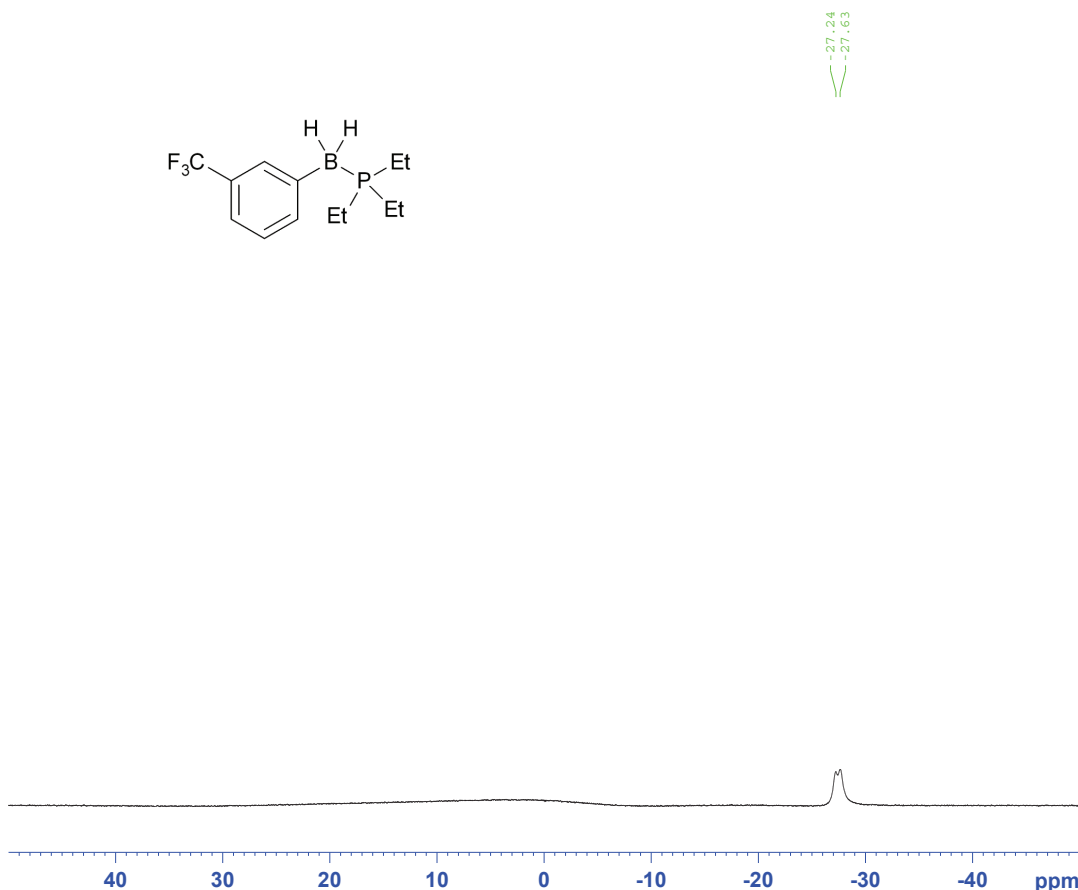

NAME Jan16-2022  
EXPNO 5  
PROCNO 1  
Date\_ 20220117  
Time 0.00  
INSTRUM av400  
PROBHD 5 mm PABBO BB-  
PULPROG zgig  
TD 32768  
SOLVENT DMSO  
NS 128  
DS 4  
SWH 20000.000 Hz  
FIDRES 0.610352 Hz  
AQ 0.8192500 sec  
RG 203  
DW 25.000 usec  
DE 20.00 usec  
TE 296.9 K  
D1 1.00000000 sec  
D11 0.03000000 sec  
TD0 1

===== CHANNEL f1 =====  
NUC1 11B  
P1 6.30 usec  
PL1 -2.00 dB  
SFO1 128.3776050 MHz

===== CHANNEL f2 =====  
CPDPRG2 waltz16  
NUC2 1H  
PCPD2 80.00 usec  
PL2 -1.70 dB  
PL12 13.80 dB  
PL2W 14.48987389 W  
PL12W 0.40838012 W  
SFO2 400.1316005 MHz  
SI 32768  
SF 128.3776183 MHz  
WDW EM  
SSB 0  
LB 2.00 Hz  
GB 0  
PC 1.40

3CF3PhBH2PEt3

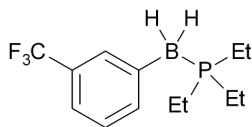

-61.12

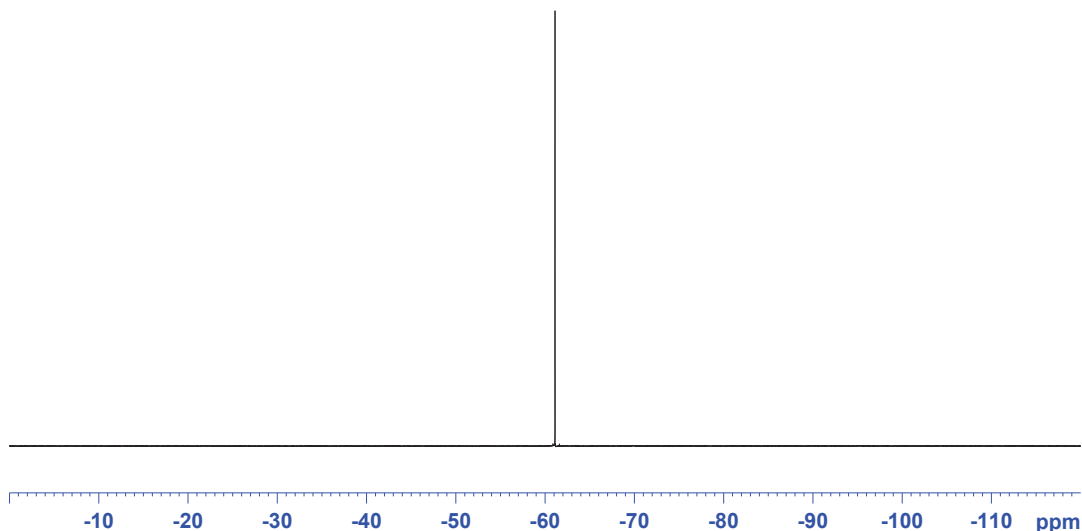

## IBB-nmr Analysis

```
NAME      Jan16-2022
EXPNO      8
PROCNO     1
Date_      20220117
Time       0.18
INSTRUM    av400
PROBHD     5 mm PABBO BB-
PULPROG    zgfhigqn
TD         131072
SOLVENT    DMSO
NS          8
DS          4
SWH        89285.711 Hz
FIDRES     0.681196 Hz
AQ         0.7340532 sec
RG          203
DW         5.600 usec
DE         6.50 usec
TE         296.4 K
D1         1.00000000 sec
D11        0.03000000 sec
D12        0.00002000 sec
TD0        1
```

```
===== CHANNEL f1 =====
NUC1       19F
P1         19.50 usec
PL1        -4.00 dB
PL1W       16.40489006 W
SFO1       376.4607164 MHz
```

```
===== CHANNEL f2 =====
CPDPRG2    waltz16
NUC2        1H
PCPD2      112.00 usec
PL2         -4.00 dB
PL12       18.00 dB
PL2W       24.60733604 W
PL12W      0.15526180 W
SFO2       400.1316005 MHz
SI          65536
SF         376.4984677 MHz
WDW         EM
SSB         0
LB          0.30 Hz
GB          0
PC          1.00
```

3CF3PhBH2PEt3

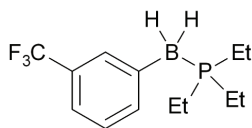

12.50

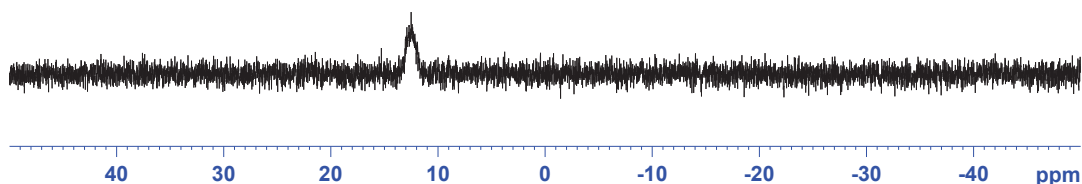

## IBB-nmr Analysis

```
NAME      Jan16-2022
EXPNO      6
PROCNO     1
Date_      20220117
Time       0.05
INSTRUM    av400
PROBHD     5 mm PABBO BB-
PULPROG    zg30
TD         65536
SOLVENT    DMSO
NS          16
DS          4
SWH        64102.563 Hz
FIDRES     0.978127 Hz
AQ         0.5112308 sec
RG          203
DW         7.800 usec
DE         6.50 usec
TE         296.3 K
D1         2.00000000 sec
TD0        1
```

```
===== CHANNEL f1 =====
NUC1       31P
P1         10.00 usec
PL1        -0.70 dB
PL1W       30.10233498 W
SFO1       161.9674942 MHz
SI          32768
SF         161.9754962 MHz
WDW         EM
SSB         0
LB          1.00 Hz
GB          0
PC          1.40
```



3CF3PhBH2PEt2Ph

## B-3-(Trifluoromethyl)phenyl diethyl(phenyl)phosphine-borane (19)

## IBB-nmr Analysis

NAME Mar5-2022  
 EXPNO 1  
 PROCNO 1  
 Date\_ 20220305  
 Time\_ 22.04  
 INSTRUM av400  
 PROBHD 5 mm PABBO BB-  
 PULPROG zg30  
 TD 65536  
 SOLVENT CD2Cl2  
 NS 16  
 DS 2  
 SWH 8223.685 Hz  
 FIDRES 0.125483 Hz  
 AQ 3.9846387 sec  
 RG 203  
 DW 60.800 usec  
 DE 6.50 usec  
 TE 296.5 K  
 D1 1.00000000 sec  
 TD0 1

===== CHANNEL f1 =====  
 NUC1 1H  
 P1 14.00 usec  
 PL1 -1.80 dB  
 PL1W 14.82738590 W  
 SFO1 400.1324710 MHz  
 SI 32768  
 SF 400.1300154 MHz  
 WDW EM  
 SSB 0  
 LB 0.30 Hz  
 GB 0  
 PC 1.00

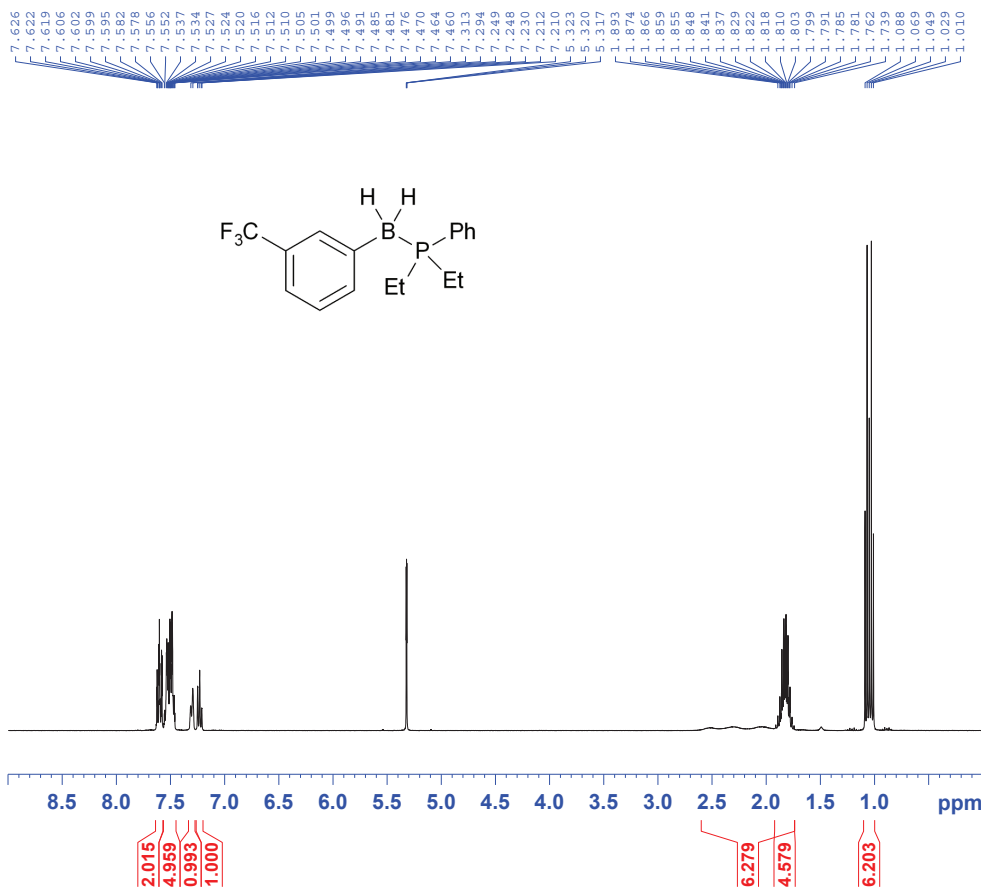

3CF3PhBH2PPhEt2

## IBB-nmr Analysis

NAME Aug19-2023  
 EXPNO 2  
 PROCNO 1  
 Date\_ 20230819  
 Time\_ 20.58  
 INSTRUM av400  
 PROBHD 5 mm PABBO BB-  
 PULPROG zgpg30  
 TD 65536  
 SOLVENT DMSO  
 NS 1024  
 DS 2  
 SWH 24038.461 Hz  
 FIDRES 0.366798 Hz  
 AQ 1.3631988 sec  
 RG 128  
 DW 20.800 usec  
 DE 6.50 usec  
 TE 298.4 K  
 D1 2.00000000 sec  
 D11 0.03000000 sec  
 TD0 1

===== CHANNEL f1 =====  
 NUC1 13C  
 P1 9.00 usec  
 PL1 -3.00 dB  
 PL1W 73.17333984 W  
 SFO1 100.6228298 MHz  
 ===== CHANNEL f2 =====  
 CPDPRG2 waltz16  
 NUC2 1H  
 PCPD2 80.00 usec  
 PL2 -1.70 dB  
 PL12 13.80 dB  
 PL13 13.80 dB  
 PL2W 14.49887389 W  
 PL12W 0.40838012 W  
 PL13W 0.40838012 W  
 SFO2 400.1316005 MHz  
 SI 32768  
 SF 100.6127689 MHz  
 WDW EM  
 SSB 0  
 LB 1.00 Hz  
 GB 0  
 PC 0.30

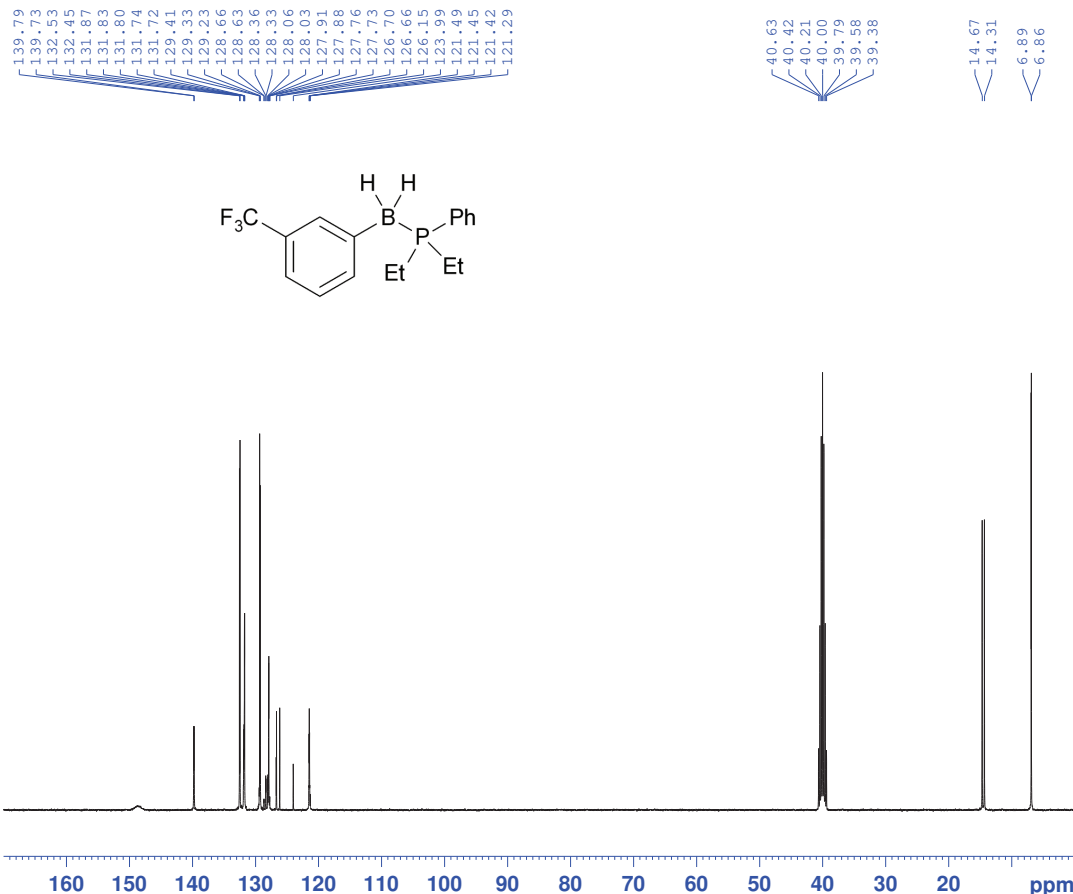

3CF3PhBH2PPhEt2

## IBB-nmr Analysis

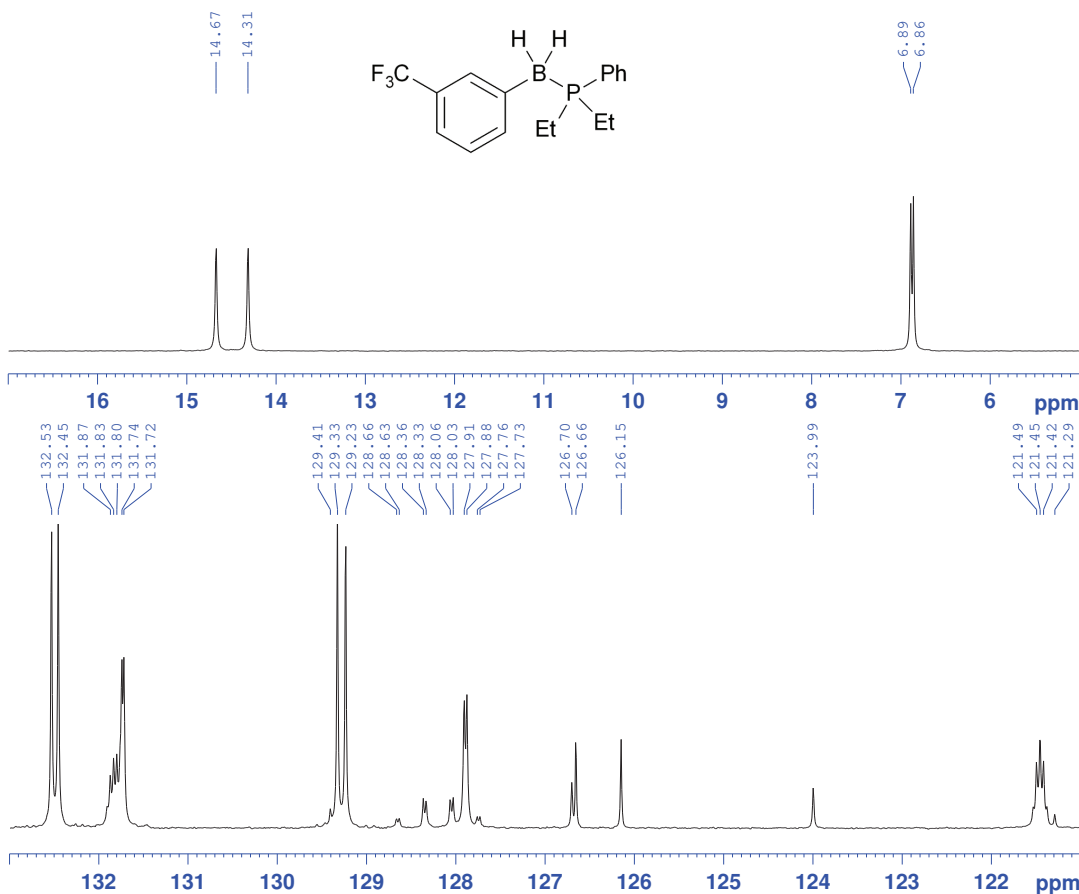

NAME Aug19-2023  
 EXPNO 2  
 PROCNO 1  
 Date\_ 20230819  
 Time 20.58  
 INSTRUM av400  
 PROBHD 5 mm PABBO BB-  
 PULPROG zgpg30  
 TD 65536  
 SOLVENT DMSO  
 NS 1024  
 DS 2  
 SWH 24038.461 Hz  
 FIDRES 0.366798 Hz  
 AQ 1.3631988 sec  
 RG 128  
 DW 20.800 usec  
 DE 6.50 usec  
 TE 298.4 K  
 D1 2.00000000 sec  
 D11 0.03000000 sec  
 TD0 1

===== CHANNEL f1 =====  
 NUC1 13C  
 P1 9.00 usec  
 PL1 -3.00 dB  
 PL1W 73.17333984 W  
 SFO1 100.6228298 MHz  
 ===== CHANNEL f2 =====  
 CPDPRG2 waltz16  
 NUC2 1H  
 PCPD2 80.00 usec  
 PL2 -1.70 dB  
 PL12 13.80 dB  
 PL13 13.80 dB  
 PL2W 14.48987389 W  
 PL12W 0.40838012 W  
 PL13W 0.40838012 W  
 SFO2 400.1316005 MHz  
 SI 32768  
 SF 100.6127689 MHz  
 WDW EM  
 SSB 0  
 LB 1.00 Hz  
 GB 0  
 PC 0.30

3CF3PhBH2Et2Ph

## IBB-nmr Analysis

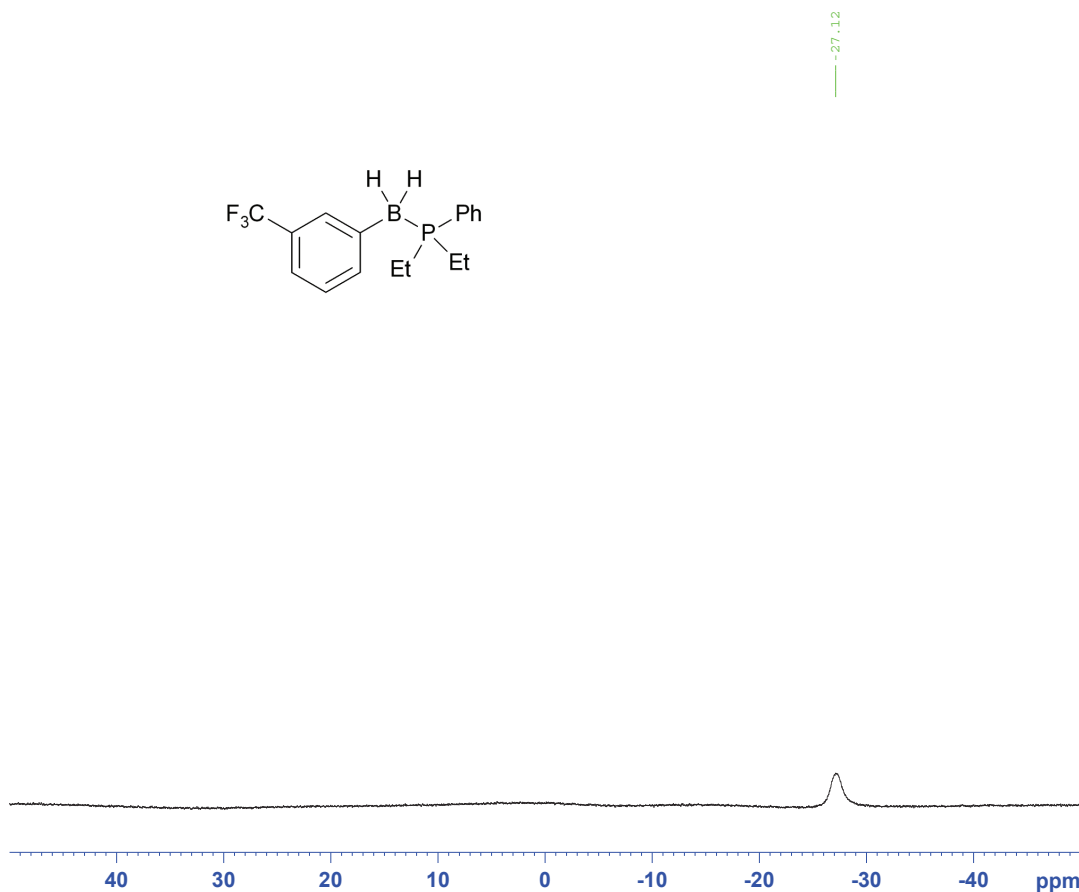

NAME Feb14-2022  
 EXPNO 4  
 PROCNO 1  
 Date\_ 20220214  
 Time 23.57  
 INSTRUM av400  
 PROBHD 5 mm PABBO BB-  
 PULPROG zgig  
 TD 32768  
 SOLVENT DMSO  
 NS 256  
 DS 4  
 SWH 20000.000 Hz  
 FIDRES 0.610352 Hz  
 AQ 0.8192500 sec  
 RG 203  
 DW 25.000 usec  
 DE 20.00 usec  
 TE 296.8 K  
 D1 1.00000000 sec  
 D11 0.03000000 sec  
 TD0 1

===== CHANNEL f1 =====  
 NUC1 11B  
 P1 6.30 usec  
 PL1 -2.00 dB  
 SFO1 128.3776050 MHz  
 ===== CHANNEL f2 =====  
 CPDPRG2 waltz16  
 NUC2 1H  
 PCPD2 80.00 usec  
 PL2 -1.70 dB  
 PL12 13.80 dB  
 PL2W 14.48987389 W  
 PL12W 0.40838012 W  
 SFO2 400.1316005 MHz  
 SI 32768  
 SF 128.3776183 MHz  
 WDW EM  
 SSB 0  
 LB 2.00 Hz  
 GB 0  
 PC 1.40

3CF3PhBH2Et2Ph

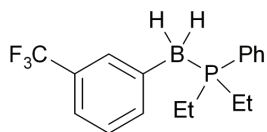

-61.18

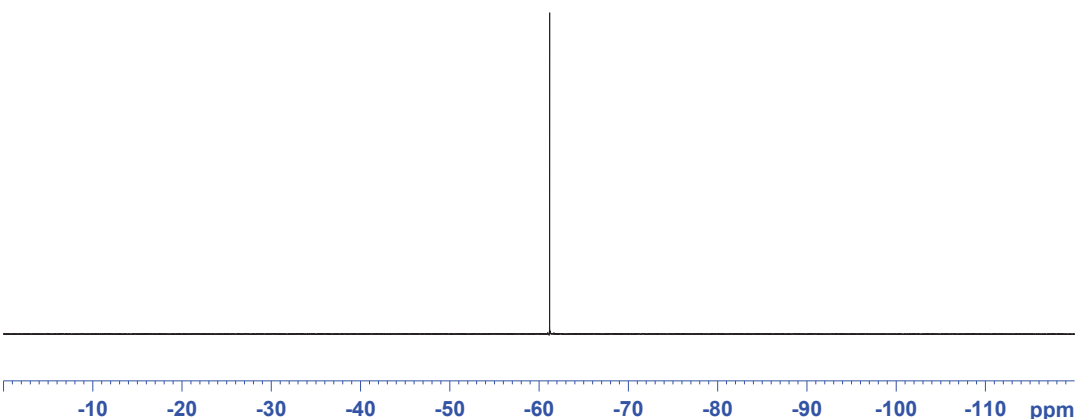

## IBB-nmr Analysis

```

NAME      Feb14-2022
EXPNO     5
PROCNO    1
Date_     20220215
Time      0.01
INSTRUM   av400
PROBHD    5 mm PABBO BB-
PULPROG   zgfhigqn
TD         131072
SOLVENT   DMSO
NS         8
DS         4
SWH        89285.711 Hz
FIDRES     0.681196 Hz
AQ         0.7340532 sec
RG         203
DW         5.600 usec
DE         6.50 usec
TE         296.3 K
D1         1.00000000 sec
D11        0.03000000 sec
D12        0.00002000 sec
TD0        1

```

```

===== CHANNEL f1 =====
NUC1       19F
P1         19.50 usec
PL1        -4.00 dB
PL1W       16.40489006 W
SFO1       376.4607164 MHz

```

```

===== CHANNEL f2 =====
CPDPRG2    waltz16
NUC2        1H
PCPD2       112.00 usec
PL2         -4.00 dB
PL12        18.00 dB
PL2W        24.60733604 W
PL12W       0.15526180 W
SFO2        400.1316005 MHz
SI          65536
SF          376.4984617 MHz
WDW         EM
SSB         0
LB          0.30 Hz
GB          0
PC          1.00

```

3CF3PhBH2Et2Ph

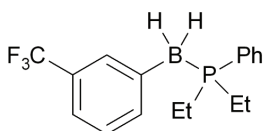

13.12

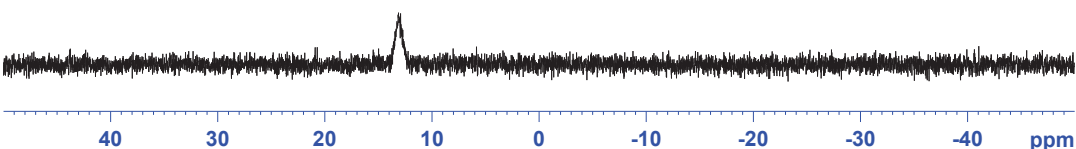

## IBB-nmr Analysis

```

NAME      Feb14-2022
EXPNO     3
PROCNO    1
Date_     20220214
Time      23.46
INSTRUM   av400
PROBHD    5 mm PABBO BB-
PULPROG   zg30
TD         65536
SOLVENT   DMSO
NS         64
DS         4
SWH        64102.563 Hz
FIDRES     0.978127 Hz
AQ         0.5112308 sec
RG         203
DW         7.800 usec
DE         6.50 usec
TE         296.1 K
D1         2.00000000 sec
TD0        1

```

```

===== CHANNEL f1 =====
NUC1       31P
P1         10.00 usec
PL1        -0.70 dB
PL1W       30.10233498 W
SFO1       161.9674942 MHz
SI         32768
SF         161.9754962 MHz
WDW         EM
SSB         0
LB          1.00 Hz
GB          0
PC          1.40

```

3CF<sub>3</sub>PhBH<sub>2</sub>P(*i*-Pr)<sub>3</sub>

B-3-(Trifluoromethyl)phenyl triisopropylphosphine-borane (20)

## IBB-nmr Analysis

NAME Apr29-2022  
 EXPNO 1  
 PROCNO 1  
 Date\_ 20220429  
 Time\_ 18.21  
 INSTRUM av400  
 PROBHD 5 mm PABBO BB-  
 PULPROG zg30  
 TD 65536  
 SOLVENT DMSO  
 NS 16  
 DS 2  
 SWH 8223.685 Hz  
 FIDRES 0.125483 Hz  
 AQ 3.9846387 sec  
 RG 203  
 DW 60.800 usec  
 DE 6.50 usec  
 TE 296.8 K  
 D1 1.00000000 sec  
 TD0 1

===== CHANNEL f1 =====  
 NUC1 1H  
 P1 14.00 usec  
 PL1 -1.80 dB  
 PL1W 14.82738590 W  
 SFO1 400.1324710 MHz  
 SI 32768  
 SF 400.1300028 MHz  
 WDW EM  
 SSB 0  
 LB 0.30 Hz  
 GB 0  
 PC 1.00

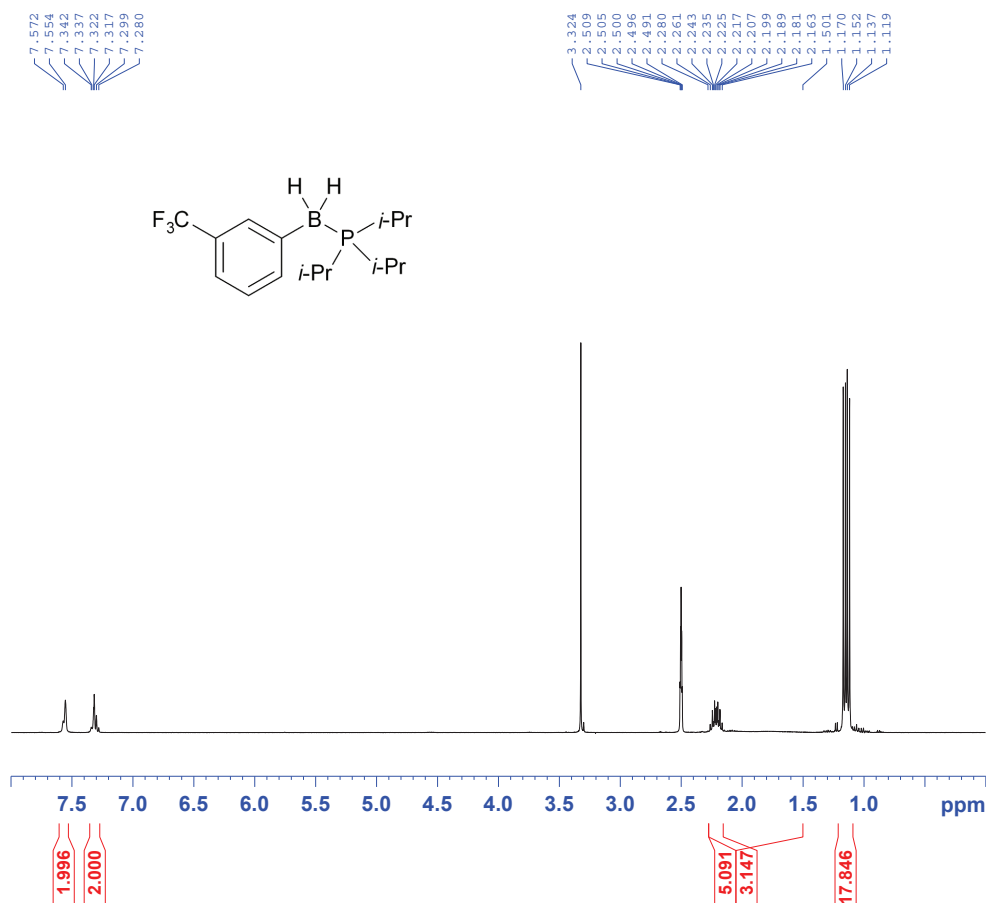3CF<sub>3</sub>PhBH<sub>2</sub>P(*i*-Pr)<sub>3</sub>

## IBB-nmr Analysis

NAME Apr29-2022  
 EXPNO 8  
 PROCNO 1  
 Date\_ 20220429  
 Time\_ 19.54  
 INSTRUM av500  
 PROBHD 5 mm CPDCH 13C  
 PULPROG zgpg30  
 TD 65536  
 SOLVENT DMSO  
 NS 1024  
 DS 4  
 SWH 30030.029 Hz  
 FIDRES 0.458222 Hz  
 AQ 1.0912410 sec  
 RG 35.9  
 DW 16.650 usec  
 DE 20.00 usec  
 TE 298.0 K  
 D1 2.00000000 sec  
 D11 0.03000000 sec  
 TD0 1

===== CHANNEL f1 =====  
 NUC1 13C  
 P1 10.00 usec  
 PL1 -5.00 dB  
 PL1W 14.29790783 W  
 SFO1 125.7703643 MHz

===== CHANNEL f2 =====  
 CPDPRG2 waltz16  
 NUC2 1H  
 PCPD2 80.00 usec  
 PL2 -4.00 dB  
 PL12 14.06 dB  
 PL13 17.00 dB  
 PL2W 6.30957365 W  
 PL12W 0.09862794 W  
 PL13W 0.05011872 W  
 SFO2 500.1320005 MHz  
 SI 32768  
 SF 125.7577875 MHz  
 WDW EM  
 SSB 0  
 LB 1.00 Hz  
 GB 0  
 PC 0.30

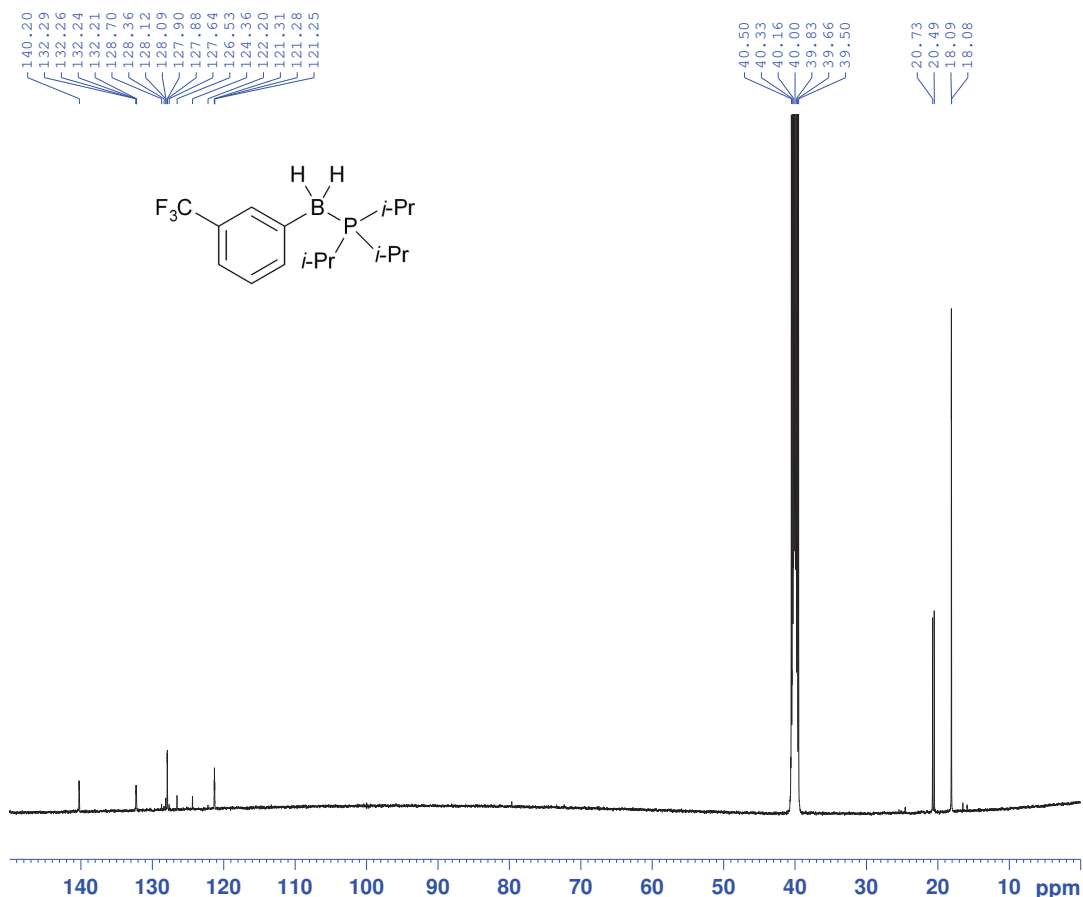

3CF3PhBH2P(i-Pr)3

## IBB-nmr Analysis

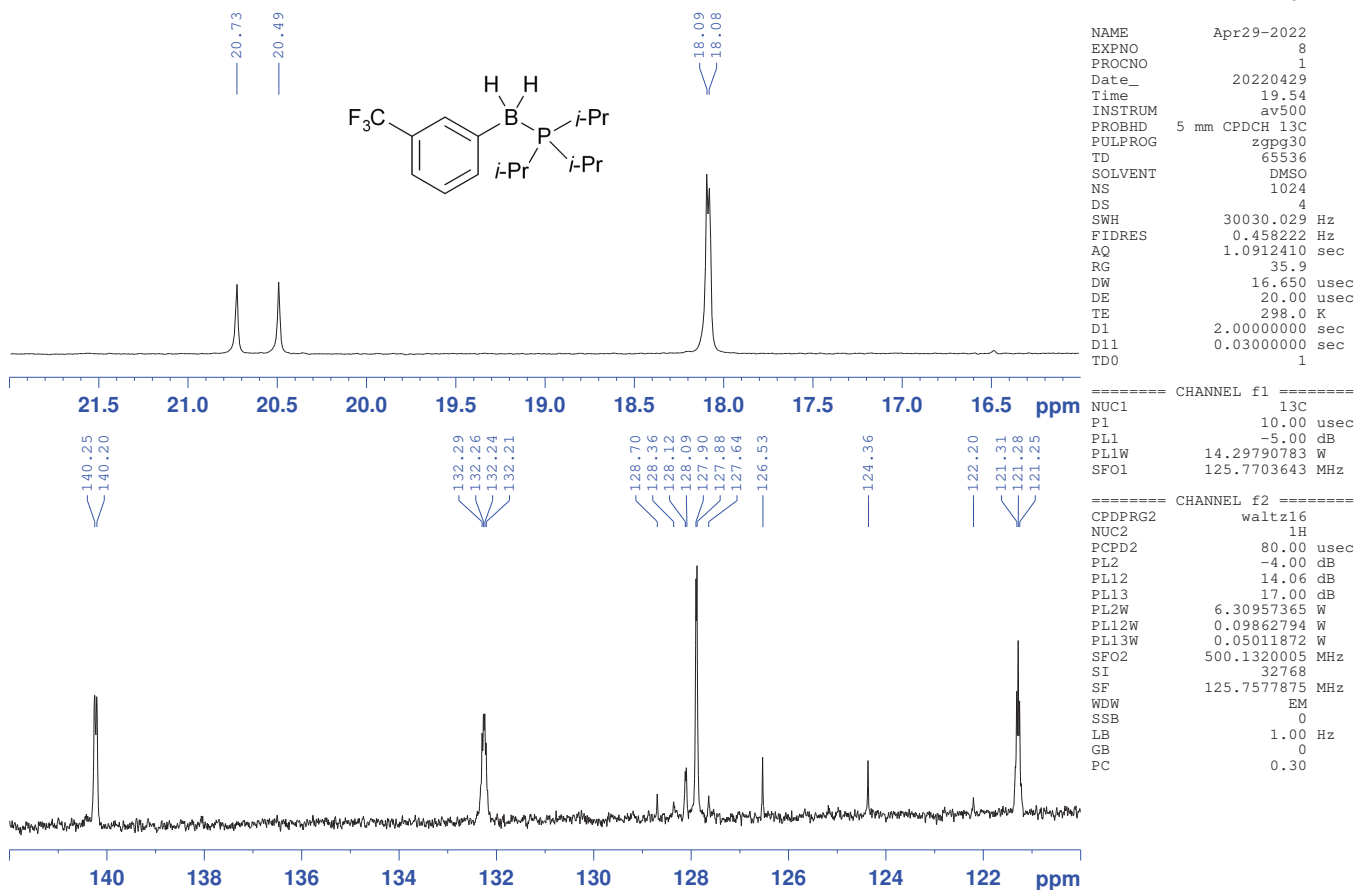

3CF3PhBH2P(i-Pr)3

## IBB-nmr Analysis

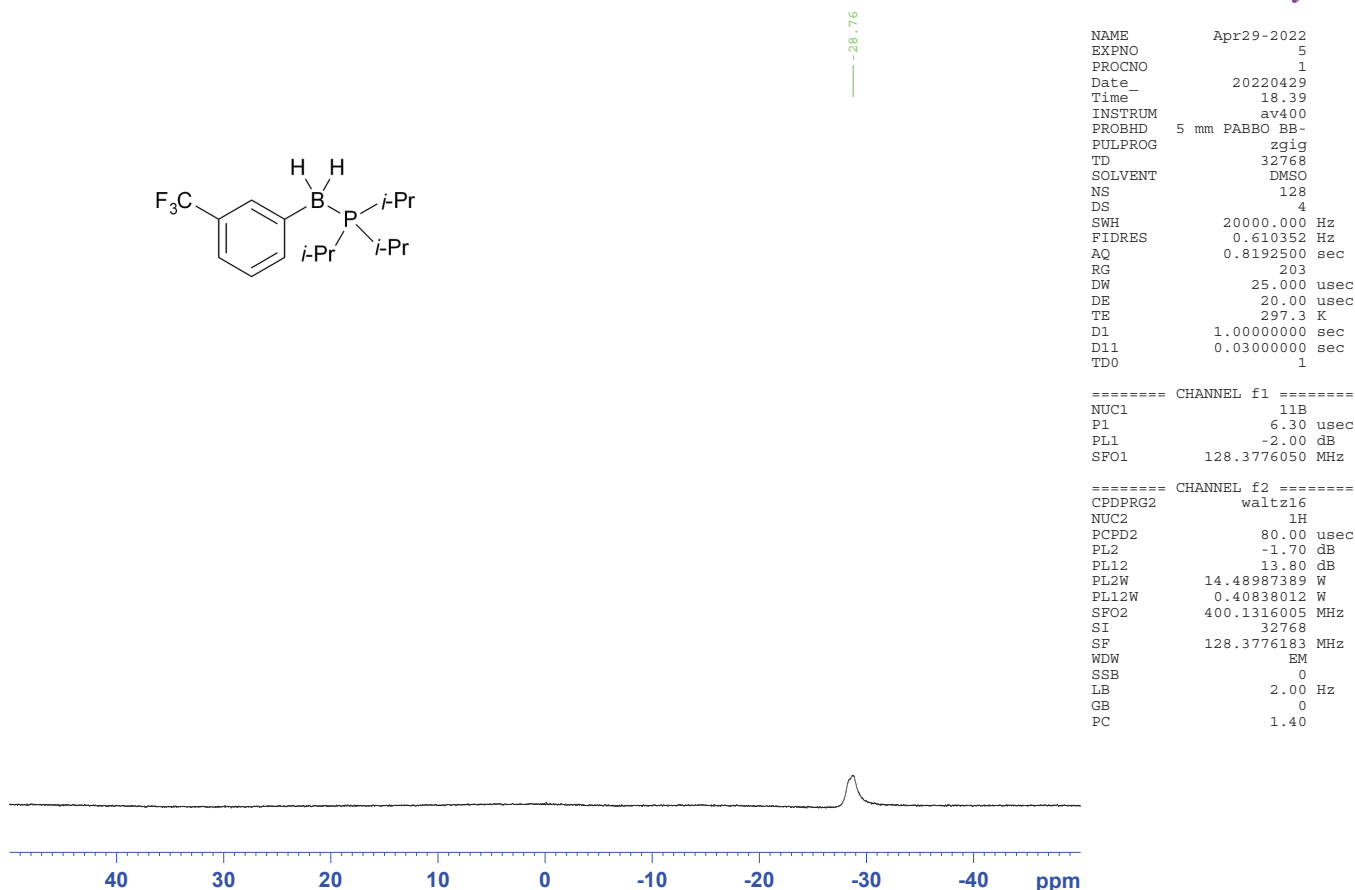

3CF3PhBH2P(*i*-Pr)<sub>3</sub>

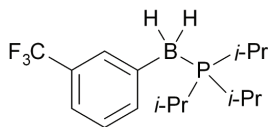

-61.15

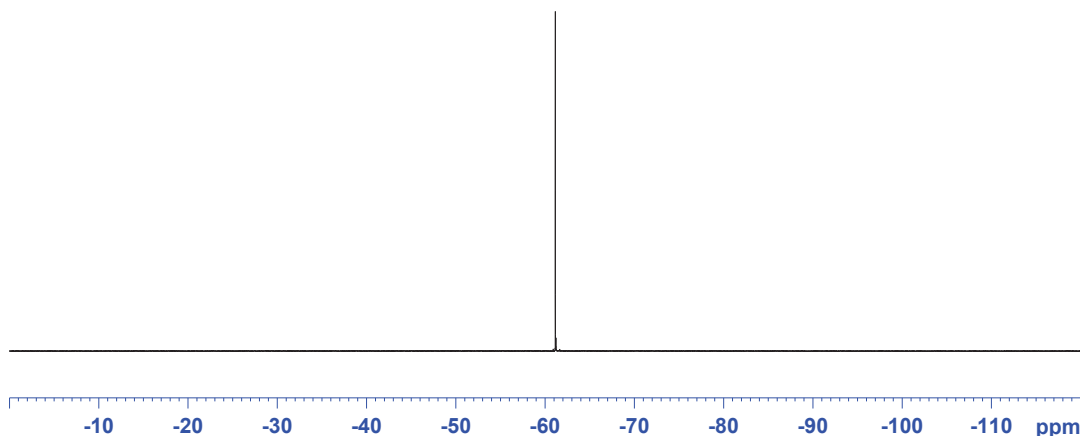

## IBB-nmr Analysis

```

NAME      Apr29-2022
EXPNO     4
PROCNO    1
Date_     20220429
Time      18.32
INSTRUM   av400
PROBHD    5 mm PABBO BB-
PULPROG   zgfhigqn
TD         131072
SOLVENT   DMSO
NS         8
DS         4
SWH        89285.711 Hz
FIDRES     0.681196 Hz
AQ         0.7340532 sec
RG         203
DW         5.600 usec
DE         6.50 usec
TE         296.7 K
D1         1.00000000 sec
D11        0.03000000 sec
D12        0.00002000 sec
TD0        1
  
```

```

===== CHANNEL f1 =====
NUC1      19F
P1        19.50 usec
PL1       -4.00 dB
PL1W      16.40489006 W
SFO1      376.4607164 MHz
  
```

```

===== CHANNEL f2 =====
CPDPRG2   waltz16
NUC2       1H
PCPD2     112.00 usec
PL2        -4.00 dB
PL12       18.00 dB
PL2W      24.60733604 W
PL12W     0.15526180 W
SFO2      400.1316005 MHz
SI         65536
SF         376.4984617 MHz
WDW        EM
SSB         0
LB         0.30 Hz
GB          0
PC          1.00
  
```

3CF3PhBH2P(*i*-Pr)<sub>3</sub>

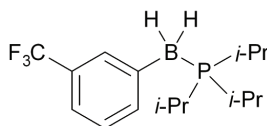

24.50

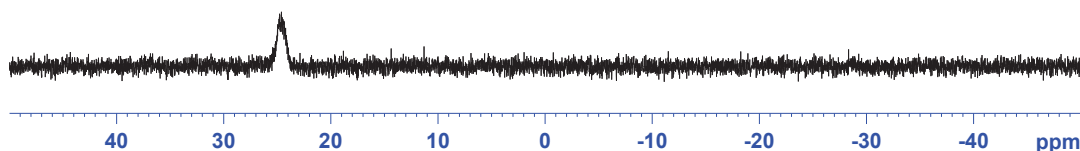

## IBB-nmr Analysis

```

NAME      Apr29-2022
EXPNO     3
PROCNO    1
Date_     20220429
Time      18.28
INSTRUM   av400
PROBHD    5 mm PABBO BB-
PULPROG   zg30
TD         65536
SOLVENT   DMSO
NS         64
DS         4
SWH        64102.563 Hz
FIDRES     0.978127 Hz
AQ         0.5112308 sec
RG         203
DW         7.800 usec
DE         6.50 usec
TE         296.8 K
D1         2.00000000 sec
TD0        1
  
```

```

===== CHANNEL f1 =====
NUC1      31P
P1        10.00 usec
PL1       -0.70 dB
PL1W      30.10233498 W
SFO1      161.9674942 MHz
SI         32768
SF         161.9754962 MHz
WDW        EM
SSB         0
LB         1.00 Hz
GB          0
PC          1.40
  
```

# B-3-(Trifluoromethyl)phenyl diisopropyl(phenyl)phosphine-borane (21)

3CF3PhBH2PPh (i-Pr) 2

## IBB-nmr Analysis

NAME Jun12-2022  
EXPNO 8  
PROCNO 1  
Date\_ 20220613  
Time\_ 0.40  
INSTRUM av400  
PROBHD 5 mm PABBO BB-  
PULPROG zg30  
TD 65536  
SOLVENT CD2Cl2  
NS 16  
DS 2  
SWH 8223.685 Hz  
FIDRES 0.125483 Hz  
AQ 3.9846387 sec  
RG 203  
DW 60.800 usec  
DE 6.50 usec  
TE 296.9 K  
D1 1.00000000 sec  
TD0 1

===== CHANNEL f1 =====  
NUC1 1H  
P1 14.00 usec  
PL1 -1.80 dB  
PL1W 14.82738590 W  
SFO1 400.1324710 MHz  
SI 32768  
SF 400.1300154 MHz  
WDW EM  
SSB 0  
LB 0.30 Hz  
GB 0  
PC 1.00

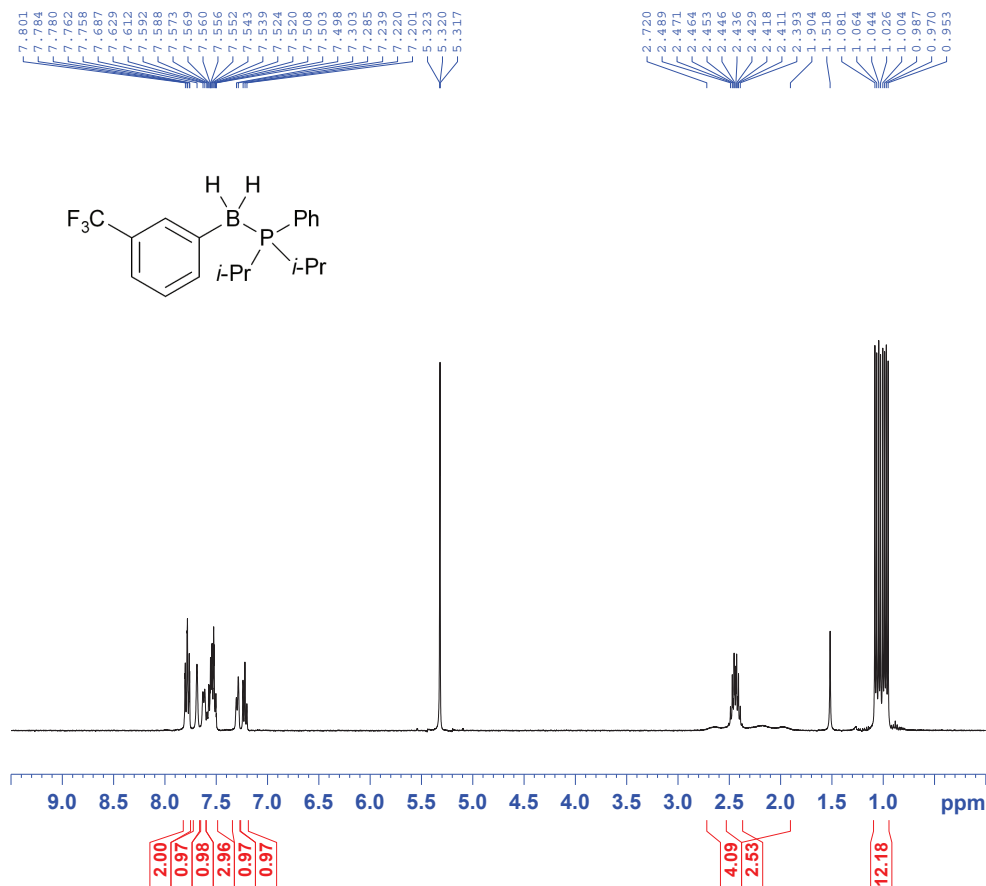

3CF3PhBH2PPh (i-Pr) 2

## IBB-nmr Analysis

NAME Aug21-2023  
EXPNO 2  
PROCNO 1  
Date\_ 20230821  
Time\_ 7.55  
INSTRUM av400  
PROBHD 5 mm PABBO BB-  
PULPROG zgpg30  
TD 65536  
SOLVENT DMSO  
NS 2048  
DS 2  
SWH 24038.461 Hz  
FIDRES 0.366798 Hz  
AQ 1.3631988 sec  
RG 128  
DW 20.800 usec  
DE 6.50 usec  
TE 298.7 K  
D1 2.00000000 sec  
D11 0.03000000 sec  
TD0 1

===== CHANNEL f1 =====  
NUC1 13C  
P1 9.00 usec  
PL1 -3.00 dB  
PL1W 73.17333984 W  
SFO1 100.6228298 MHz

===== CHANNEL f2 =====  
CPDPRG2 waltz16  
NUC2 1H  
PCPD2 80.00 usec  
PL2 -1.70 dB  
PL12 13.80 dB  
PL13 13.80 dB  
PL2W 14.49887389 W  
PL12W 0.40838012 W  
PL13W 0.40838012 W  
SFO2 400.1316005 MHz  
SI 32768  
SF 100.6127696 MHz  
WDW EM  
SSB 0  
LB 1.00 Hz  
GB 0  
PC 0.30

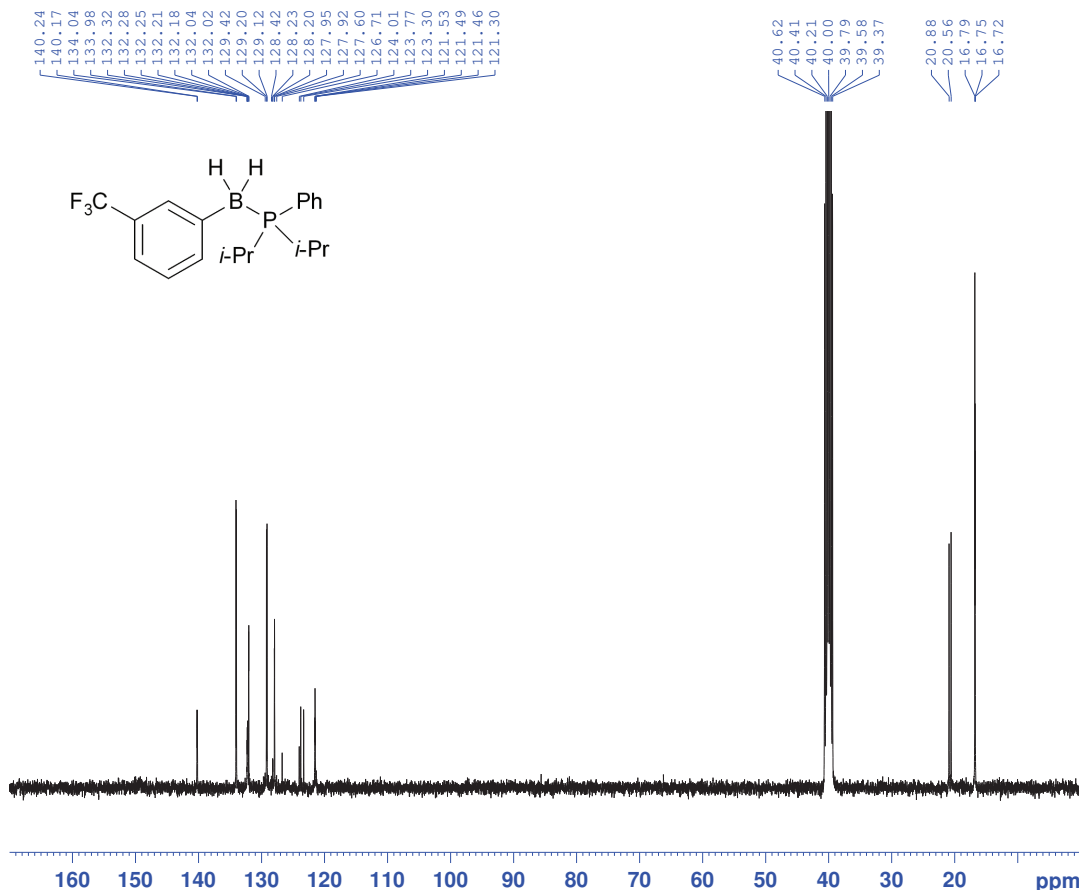

3CF3PhBH2PPh (i-Pr) 2

## IBB-nmr Analysis

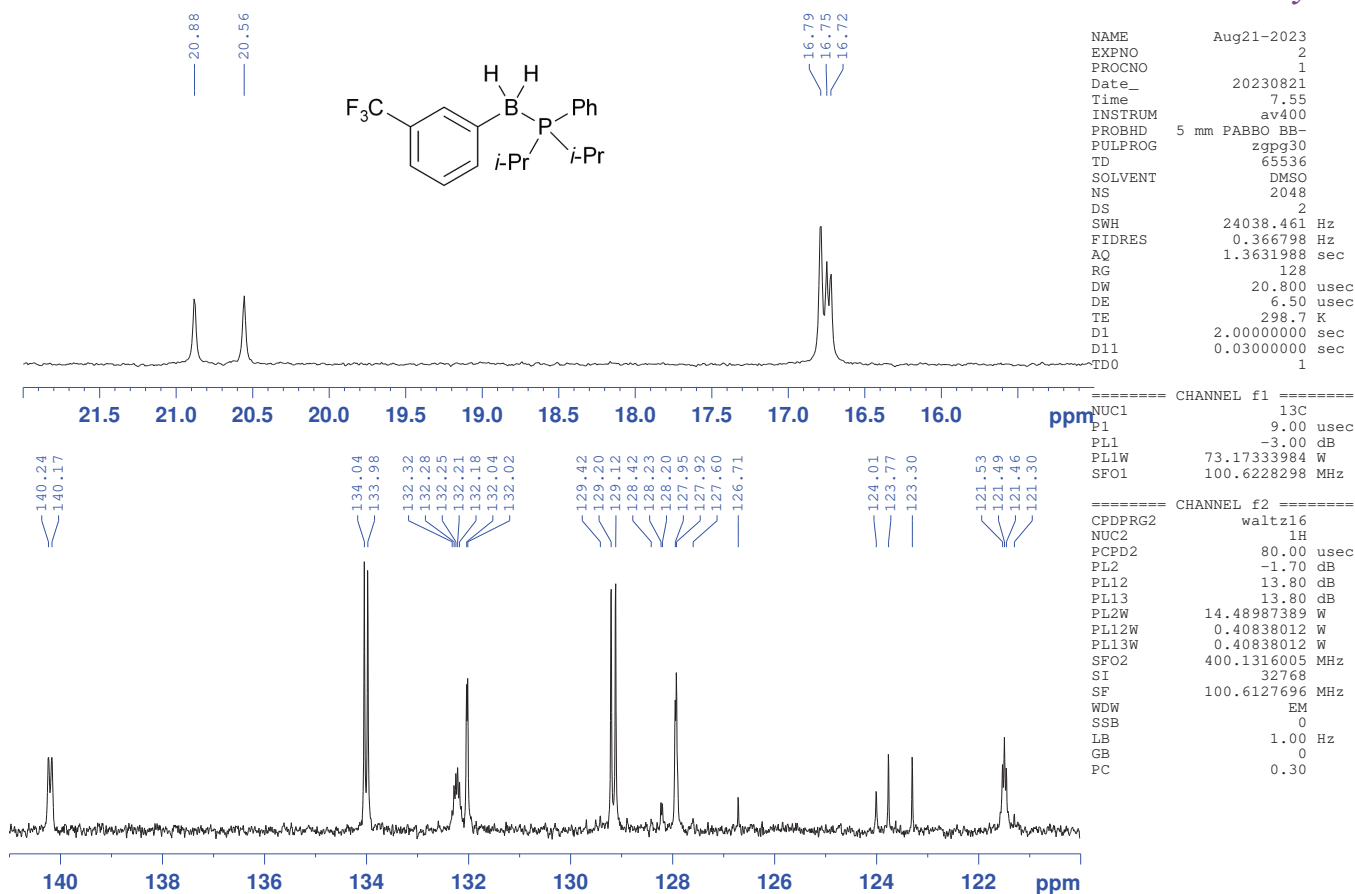

3CF3PhBH2PPh (i-Pr) 2

## IBB-nmr Analysis

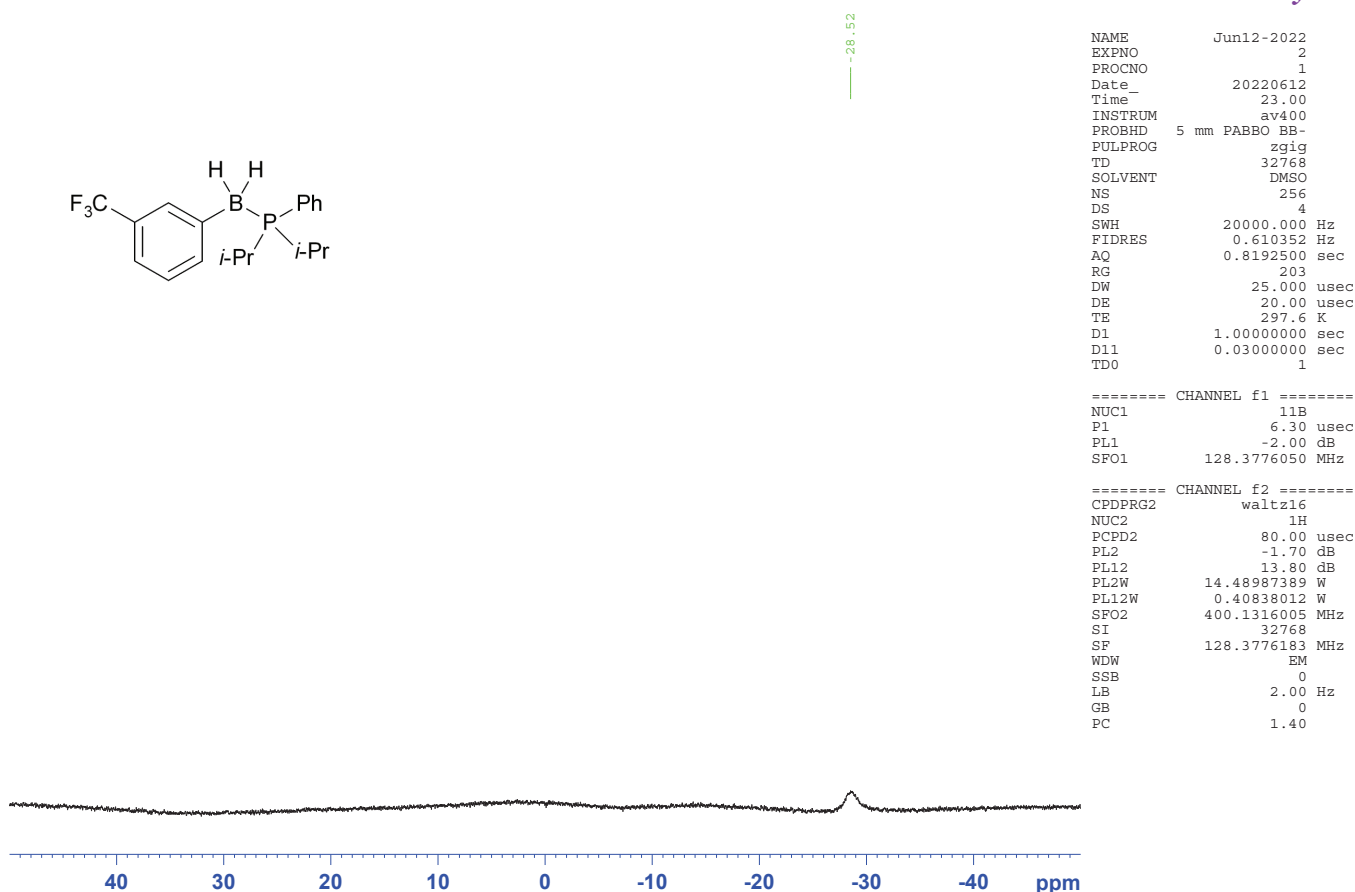



3CF3PhBH2PPh(i-Pr)2

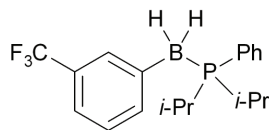

-61.20

## IBB-nmr Analysis

```

NAME      Jun12-2022
EXPNO      3
PROCNO      1
Date_      20220612
Time       23.04
INSTRUM     av400
PROBHD      5 mm PABBO BB-
PULPROG     zgfhigqn
TD          131072
SOLVENT      DMSO
NS           8
DS           4
SWH          89285.711 Hz
FIDRES       0.681196 Hz
AQ           0.7340532 sec
RG           203
DW           5.600 usec
DE           6.50 usec
TE           297.1 K
D1           1.00000000 sec
D11          0.03000000 sec
D12          0.0002000 sec
TD0          1

```

```

===== CHANNEL f1 =====
NUC1        19F
P1           19.50 usec
PL1          -4.00 dB
PL1W         16.40489006 W
SFO1         376.4607164 MHz

```

```

===== CHANNEL f2 =====
CPDPRG2     waltz16
NUC2         1H
PCPD2        112.00 usec
PL2          -4.00 dB
PL12         18.00 dB
PL2W         24.60733604 W
PL12W        0.15526180 W
SFO2         400.1316005 MHz
SI           65536
SF           376.4984617 MHz
WDW          EM
SSB          0
LB           0.30 Hz
GB           0
PC           1.00

```

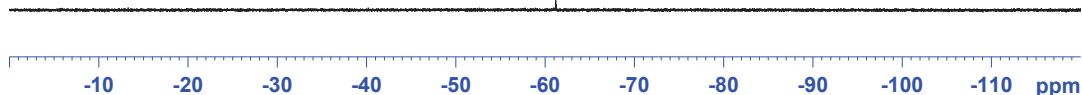

3CF3PhBH2PPh(i-Pr)2

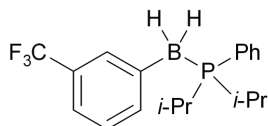

22.07

## IBB-nmr Analysis

```

NAME      Jun12-2022
EXPNO      7
PROCNO      1
Date_      20220613
Time       0.33
INSTRUM     av400
PROBHD      5 mm PABBO BB-
PULPROG     zg30
TD          65536
SOLVENT      DMSO
NS           128
DS           4
SWH          64102.563 Hz
FIDRES       0.978127 Hz
AQ           0.5112308 sec
RG           203
DW           7.800 usec
DE           6.50 usec
TE           297.0 K
D1           2.00000000 sec
TD0          1

```

```

===== CHANNEL f1 =====
NUC1        31P
P1           10.00 usec
PL1          -0.70 dB
PL1W         30.10233498 W
SFO1         161.9674942 MHz
SI           32768
SF           161.9754962 MHz
WDW          EM
SSB          0
LB           1.00 Hz
GB           0
PC           1.40

```

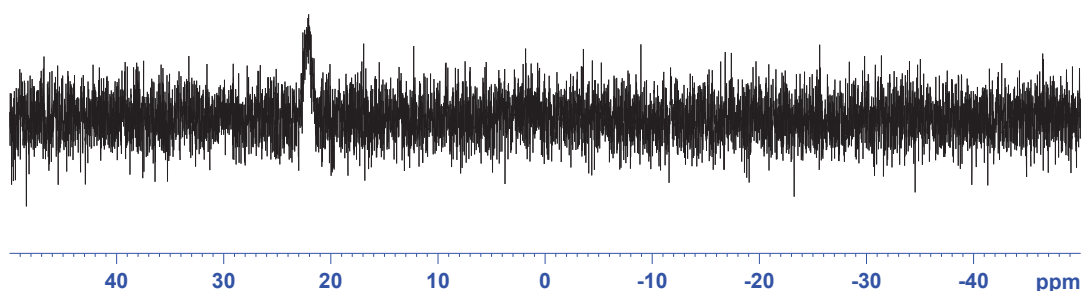

# B-3-(Trifluoromethyl)phenyl tricyclopropylphosphine-borane (22)

3CF3PhBH2P(cyclopropyl)3

## IBB-nmr Analysis

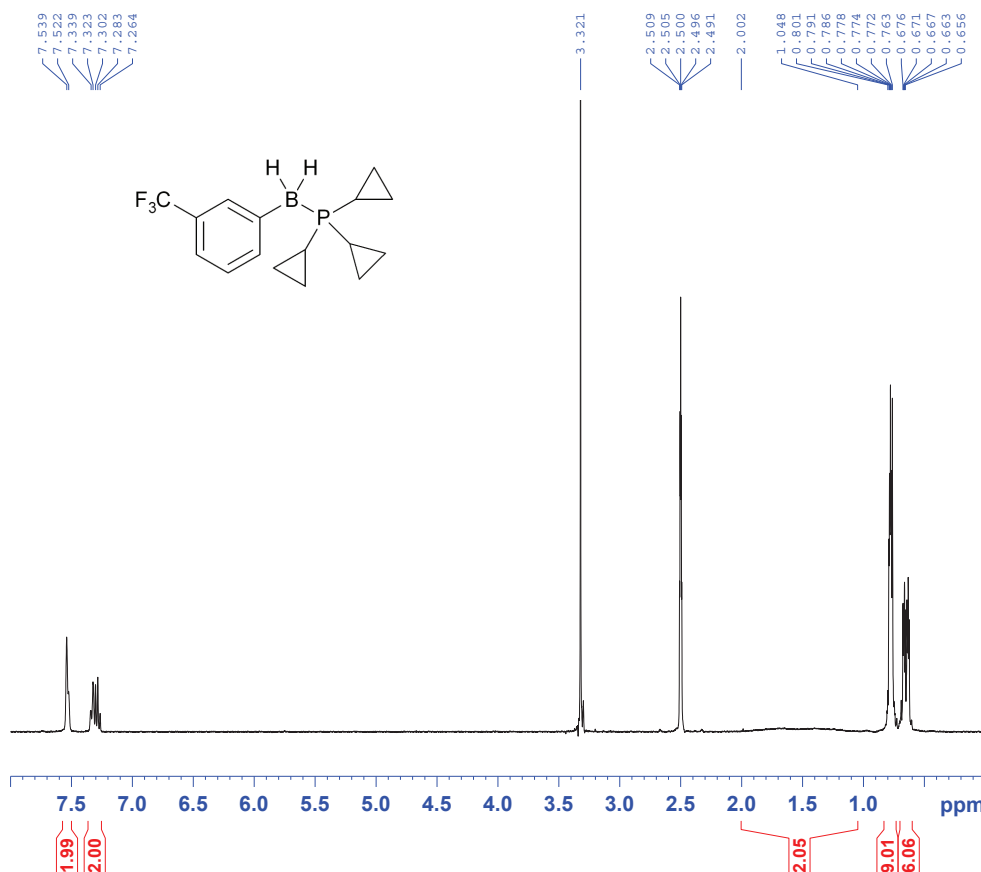

NAME July11-2022  
 EXPNO 1  
 PROCNO 1  
 Date\_ 20220711  
 Time 21.22  
 INSTRUM av400  
 PROBHD 5 mm PABBO BB-  
 PULPROG zg30  
 TD 65536  
 SOLVENT DMSO  
 NS 4  
 DS 2  
 SWH 8223.685 Hz  
 FIDRES 0.125483 Hz  
 AQ 3.9846387 sec  
 RG 203  
 DW 60.800 usec  
 DE 6.50 usec  
 TE 297.4 K  
 D1 1.00000000 sec  
 TD0 1

===== CHANNEL f1 =====  
 NUC1 1H  
 P1 14.00 usec  
 PL1 -1.80 dB  
 PL1W 14.82738590 W  
 SFO1 400.1324710 MHz  
 SI 32768  
 SF 400.1300029 MHz  
 WDW EM  
 SSB 0  
 LB 0.30 Hz  
 GB 0  
 PC 1.00

3CF3PhBH2P(cyclopropyl)3

## IBB-nmr Analysis

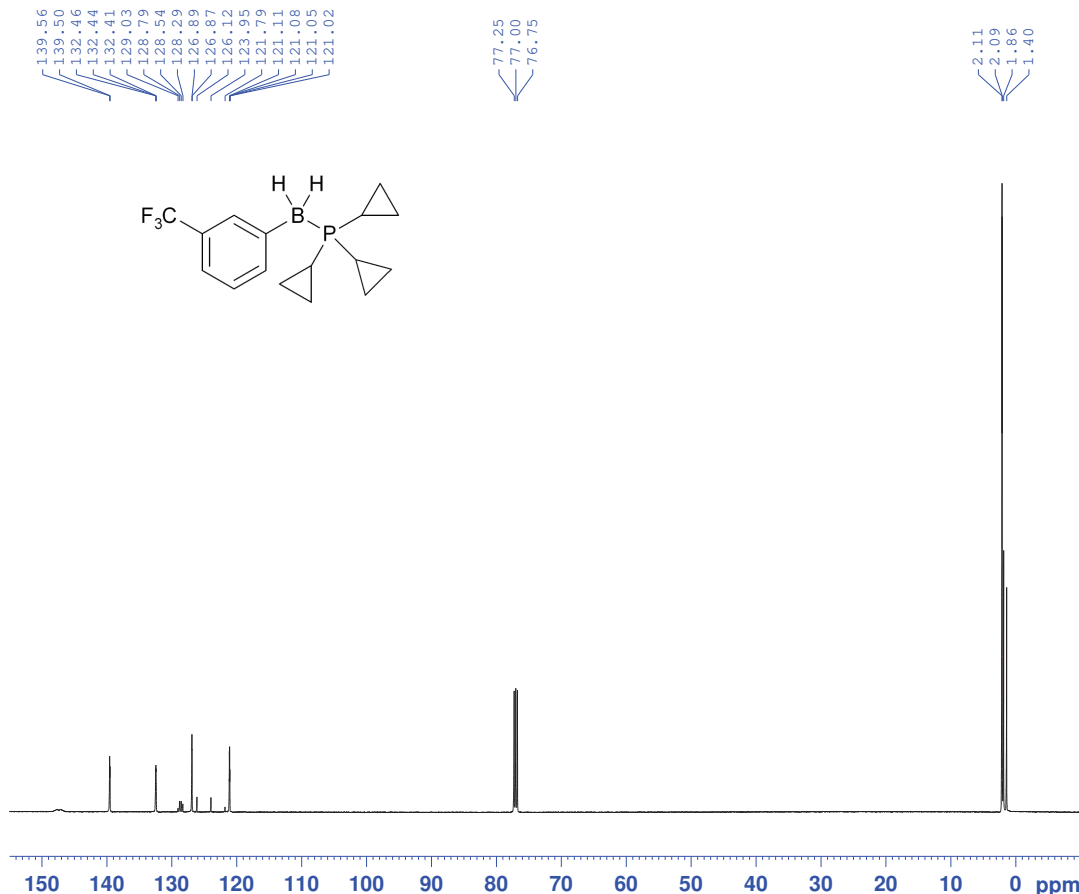

NAME Mar11-2024  
 EXPNO 3  
 PROCNO 1  
 Date\_ 20240311  
 Time 15.20  
 INSTRUM av500  
 PROBHD 5 mm CPDCH 13C  
 PULPROG zgpg30  
 TD 65536  
 SOLVENT CDCl3  
 NS 64  
 DS 4  
 SWH 30030.029 Hz  
 FIDRES 0.458222 Hz  
 AQ 1.0912410 sec  
 RG 40.3  
 DW 16.650 usec  
 DE 20.00 usec  
 TE 298.1 K  
 D1 2.00000000 sec  
 D11 0.03000000 sec  
 TD0 1

===== CHANNEL f1 =====  
 NUC1 13C  
 P1 10.00 usec  
 PL1 -5.00 dB  
 PL1W 14.29790783 W  
 SFO1 125.7703643 MHz

===== CHANNEL f2 =====  
 CPDPRG2 waltz16  
 NUC2 1H  
 PCPD2 80.00 usec  
 PL2 -4.00 dB  
 PL12 14.06 dB  
 PL13 17.00 dB  
 PL2W 6.30857365 W  
 PL12W 0.09862794 W  
 PL13W 0.05011872 W  
 SFO2 500.1320005 MHz  
 SI 32768  
 SF 125.7577974 MHz  
 WDW EM  
 SSB 0  
 LB 1.00 Hz  
 GB 0  
 PC 0.30

3CF3PhBH2P (cyclopropyl) 3

# IBB-nmr Analysis

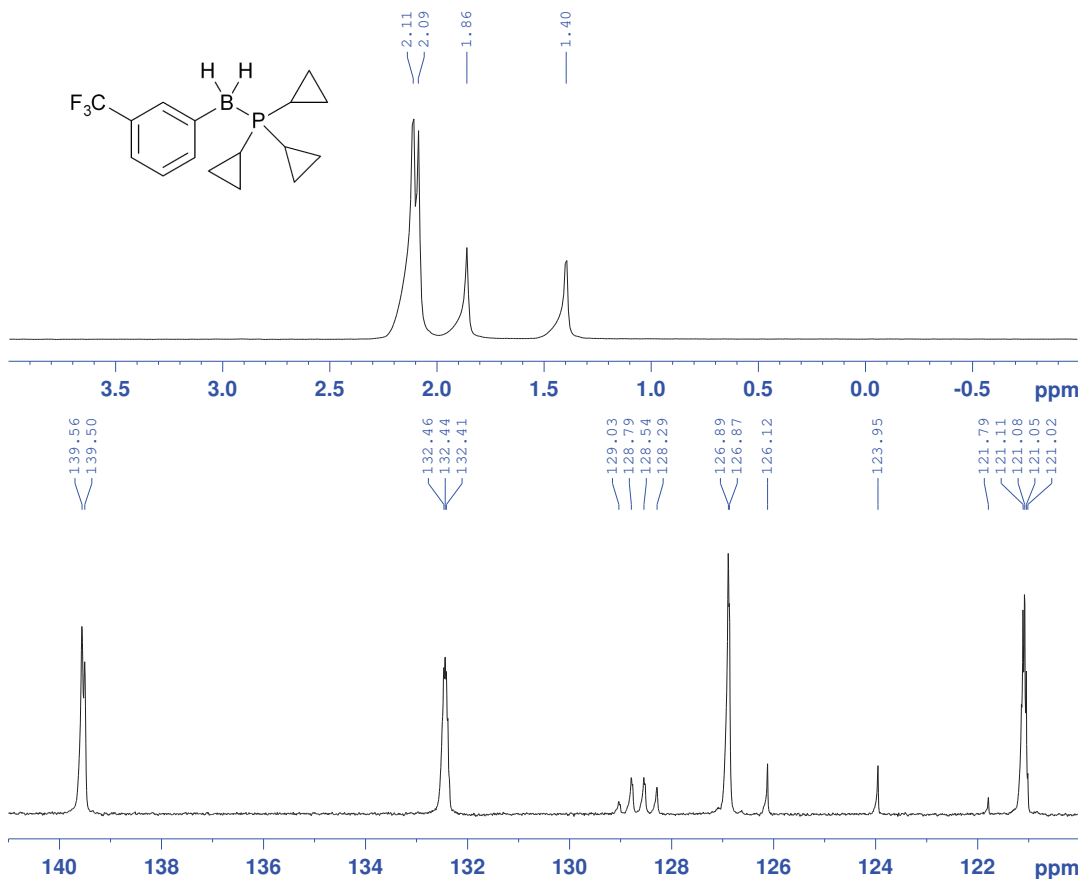

```

NAME      Mar11-2024
EXPNO     3
PROCNO    1
Date_     20240311
Time      15.20
INSTRUM   av500
PROBHD    5 mm CPDCH 13C
PULPROG   zgpg30
TD         65536
SOLVENT   CDCl3
NS         64
DS         4
SWH        30030.029 Hz
FIDRES     0.458222 Hz
AQ         1.0912410 sec
RG         40.3
DW         16.650 usec
DE         20.00 usec
TE         298.1 K
D1         2.00000000 sec
D11        0.03000000 sec
TD0        1
  
```

```

===== CHANNEL f1 =====
NUC1      13C
P1        10.00 usec
PL1       -5.00 dB
PL1W      14.29790783 W
SFO1      125.7703643 MHz

===== CHANNEL f2 =====
CPDPRG2   waltz16
NUC2      1H
PCPD2     80.00 usec
PL2       -4.00 dB
PL12      14.06 dB
PL13      17.00 dB
PL2W      6.30957365 W
PL12W     0.09862794 W
PL13W     0.05011872 W
SFO2      500.1320005 MHz
SI        32768
SF        125.7577974 MHz
WDW        EM
SSB        0
LB         1.00 Hz
GB         0
PC         0.30
  
```

3CF3PhBH2P (cyclopropyl) 3

# IBB-nmr Analysis

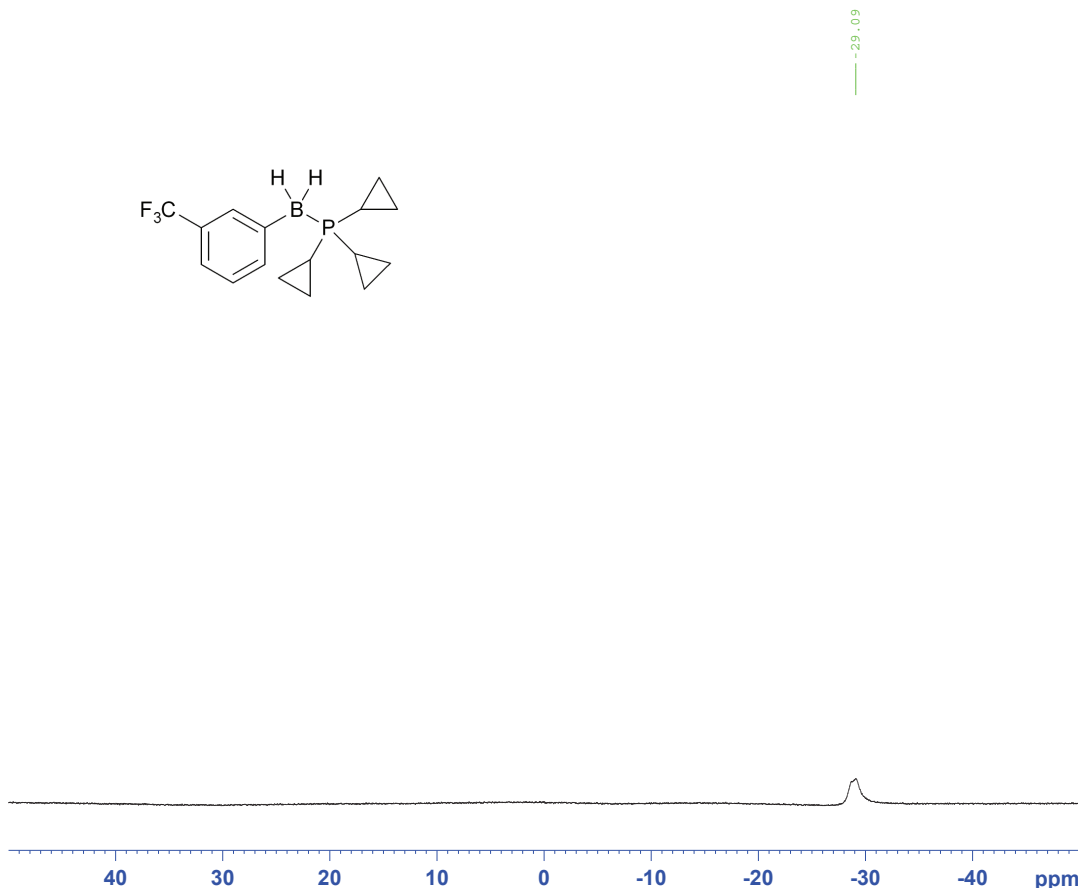

```

NAME      July11-2022
EXPNO     5
PROCNO    1
Date_     20220711
Time      23.00
INSTRUM   av400
PROBHD    5 mm PABBO BB-
PULPROG   zgig
TD         32768
SOLVENT   DMSO
NS         128
DS         4
SWH        20000.000 Hz
FIDRES     0.610352 Hz
AQ         0.8192500 sec
RG         203
DW         25.000 usec
DE         20.00 usec
TE         297.8 K
D1         1.00000000 sec
D11        0.03000000 sec
TD0        1
  
```

```

===== CHANNEL f1 =====
NUC1      11B
P1        6.30 usec
PL1       -2.00 dB
SFO1      128.3776050 MHz

===== CHANNEL f2 =====
CPDPRG2   waltz16
NUC2      1H
PCPD2     80.00 usec
PL2       -1.70 dB
PL12      13.80 dB
PL13      14.48987389 W
PL12W     0.40838012 W
SFO2      400.1316005 MHz
SI        32768
SF        128.3776183 MHz
WDW        EM
SSB        0
LB         2.00 Hz
GB         0
PC         1.40
  
```

3CF3PhBH2P(cyclopropyl)3

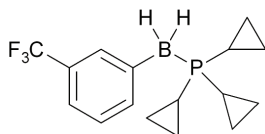

-61.09

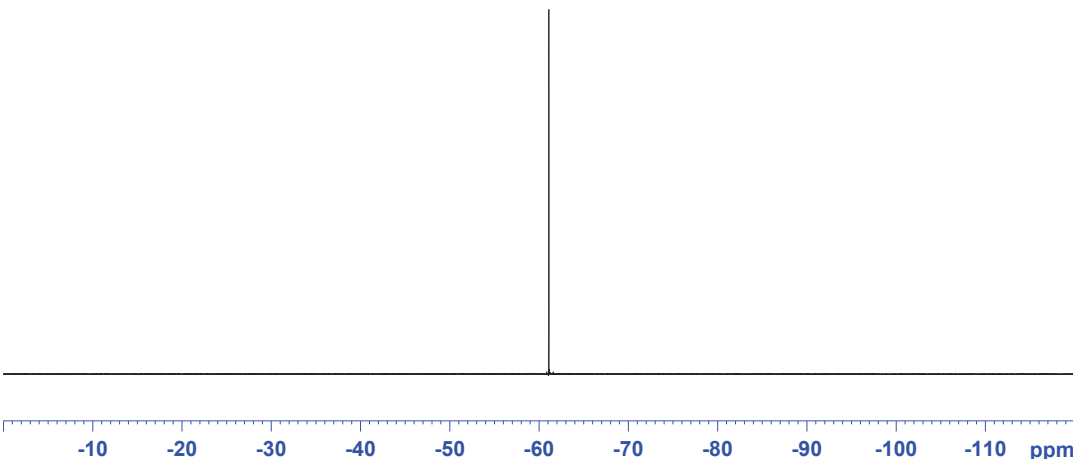

## IBB-nmr Analysis

```
NAME      July11-2022
EXPNO     2
PROCNO    1
Date_     20220711
Time      21.26
INSTRUM   av400
PROBHD    5 mm PABBO BB-
PULPROG   zgfhigqn
TD         131072
SOLVENT   DMSO
NS         8
DS         4
SWH        89285.711 Hz
FIDRES     0.681196 Hz
AQ         0.7340532 sec
RG         203
DW         5.600 usec
DE         6.50 usec
TE         297.5 K
D1         1.00000000 sec
D11        0.03000000 sec
D12        0.00002000 sec
TD0        1
```

```
===== CHANNEL f1 =====
NUC1       19F
P1         19.50 usec
PL1        -4.00 dB
PL1W       16.40489006 W
SFO1       376.4607164 MHz
```

```
===== CHANNEL f2 =====
CPDPRG2    waltz16
NUC2        1H
PCPD2      112.00 usec
PL2         -4.00 dB
PL12        18.00 dB
PL2W       24.60733604 W
PL12W      0.15526180 W
SFO2       400.1316005 MHz
SI          65536
SF         376.4984617 MHz
WDW         EM
SSB         0
LB          0.30 Hz
GB          0
PC          1.00
```

3CF3PhBH2P(cyclopropyl)3

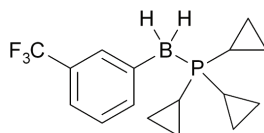

17.25

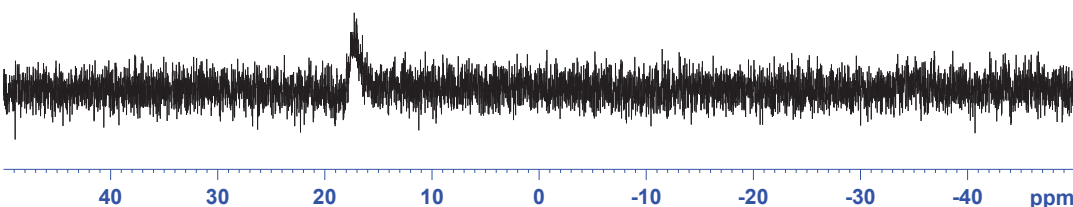

## IBB-nmr Analysis

```
NAME      July11-2022
EXPNO     4
PROCNO    1
Date_     20220711
Time      22.52
INSTRUM   av400
PROBHD    5 mm PABBO BB-
PULPROG   zg30
TD         65536
SOLVENT   DMSO
NS         16
DS         4
SWH        64102.563 Hz
FIDRES     0.978127 Hz
AQ         0.5112308 sec
RG         203
DW         7.800 usec
DE         6.50 usec
TE         297.3 K
D1         2.00000000 sec
D11        1
```

```
===== CHANNEL f1 =====
NUC1       31P
P1         10.00 usec
PL1        -0.70 dB
PL1W       30.10233498 W
SFO1       161.9674942 MHz
SI          32768
SF         161.9754962 MHz
WDW         EM
SSB         0
LB          1.00 Hz
GB          0
PC          1.40
```

3CF<sub>3</sub>PhBH<sub>2</sub>P(n-Bu)<sub>3</sub>

## B-3-(Trifluoromethyl)phenyl tri-n-butylphosphine-borane (23)

## IBB-nmr Analysis

NAME May23-2022  
 EXPNO 1  
 PROCNO 1  
 Date\_ 20220523  
 Time\_ 21.48  
 INSTRUM av400  
 PROBHD 5 mm PABBO BB-  
 PULPROG zg30  
 TD 65536  
 SOLVENT DMSO  
 NS 16  
 DS 2  
 SWH 8223.685 Hz  
 FIDRES 0.125483 Hz  
 AQ 3.9846387 sec  
 RG 203  
 DW 60.800 usec  
 DE 6.50 usec  
 TE 296.9 K  
 D1 1.00000000 sec  
 TD0 1

===== CHANNEL f1 =====  
 NUC1 1H  
 P1 14.00 usec  
 PL1 -1.80 dB  
 PL1W 14.82738590 W  
 SFO1 400.1324710 MHz  
 SI 32768  
 SF 400.1300029 MHz  
 WDW EM  
 SSB 0  
 LB 0.30 Hz  
 GB 0  
 PC 1.00

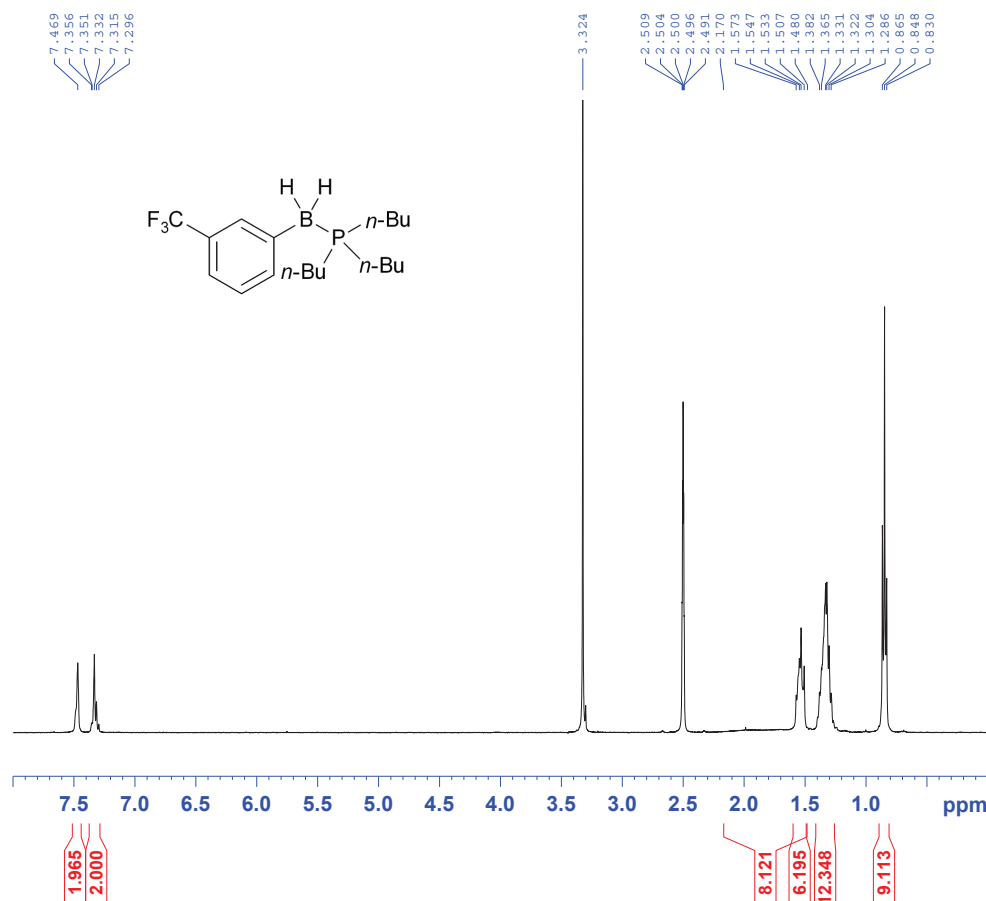3CF<sub>3</sub>PhBH<sub>2</sub>P(n-Bu)<sub>3</sub>

## IBB-nmr Analysis

NAME Mar08-2024  
 EXPNO 10  
 PROCNO 1  
 Date\_ 20240308  
 Time\_ 5.46  
 INSTRUM av500  
 PROBHD 5 mm CPDCH 13C  
 PULPROG zgpg30  
 TD 65536  
 SOLVENT CDCl<sub>3</sub>  
 NS 64  
 DS 4  
 SWH 30030.029 Hz  
 FIDRES 0.458222 Hz  
 AQ 1.0912410 sec  
 RG 90.5  
 DW 16.650 usec  
 DE 20.00 usec  
 TE 298.0 K  
 D1 2.00000000 sec  
 D11 0.03000000 sec  
 TD0 1

===== CHANNEL f1 =====  
 NUC1 13C  
 P1 10.00 usec  
 PL1 -5.00 dB  
 PL1W 14.29790783 W  
 SFO1 125.7703643 MHz

===== CHANNEL f2 =====  
 CPDPRG2 waltz16  
 NUC2 1H  
 PCPD2 80.00 usec  
 PL2 -4.00 dB  
 PL12 14.06 dB  
 PL13 17.00 dB  
 PL2W 6.30957365 W  
 PL12W 0.09862794 W  
 PL13W 0.05011872 W  
 SFO2 500.1320005 MHz  
 SI 32768  
 SF 125.7578001 MHz  
 WDW EM  
 SSB 0  
 LB 1.00 Hz  
 GB 0  
 PC 0.30

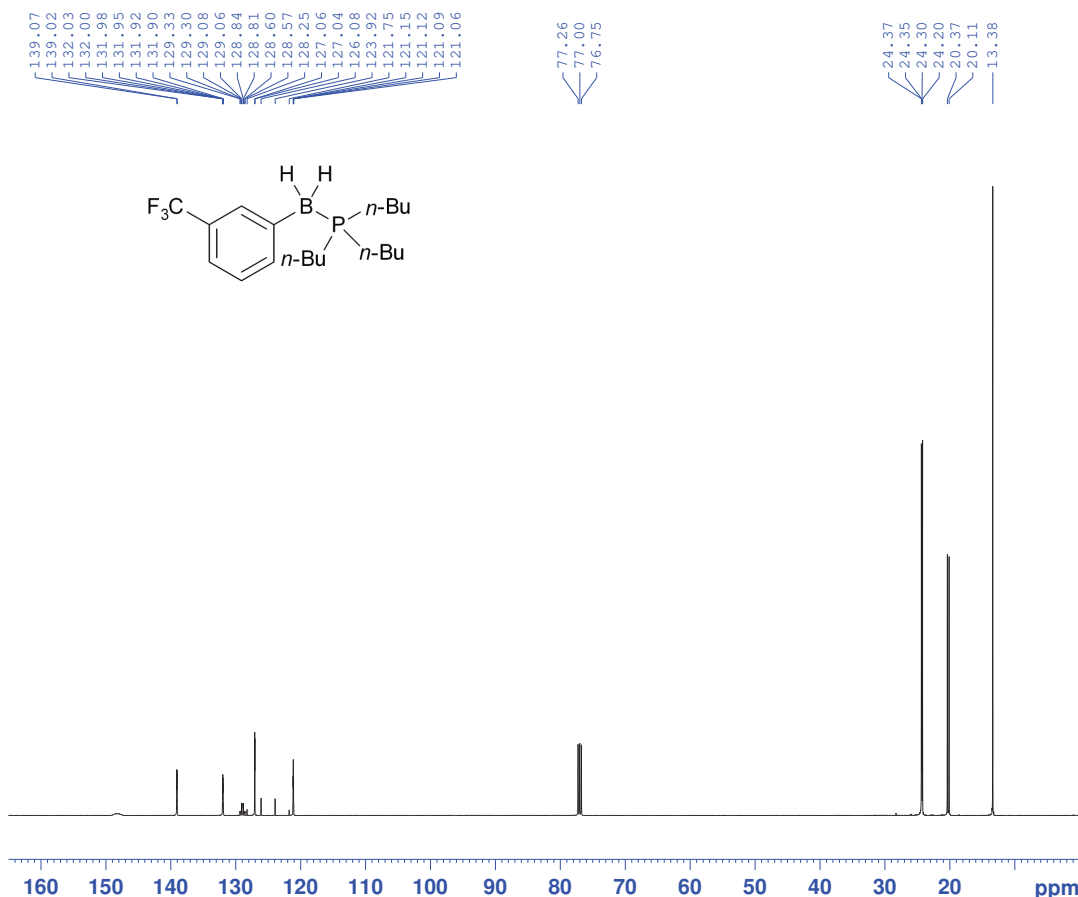

3CF3PhBH2P (n-Bu) 3

## IBB-nmr Analysis

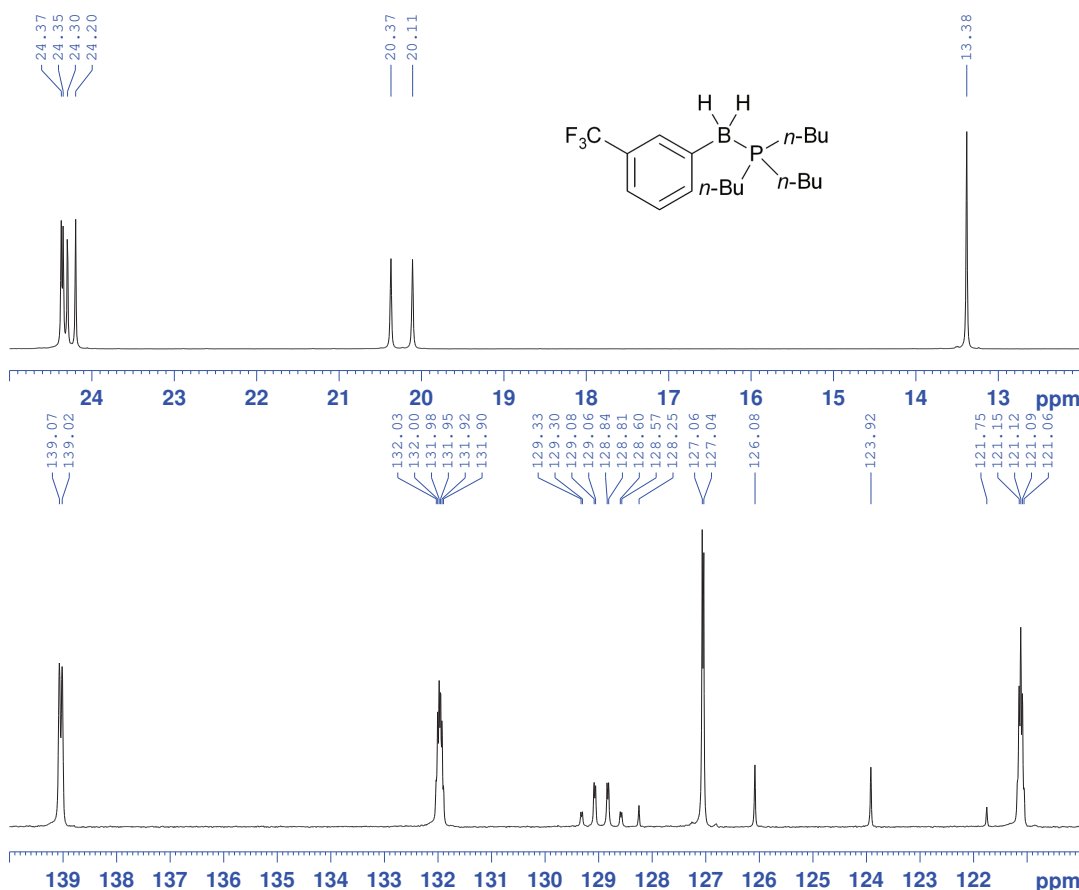

NAME Mar08-2024  
 EXPNO 10  
 PROCNO 1  
 Date\_ 20240308  
 Time 5.46  
 INSTRUM av500  
 PROBHD 5 mm CPDCH 13C  
 PULPROG zgpg30  
 TD 65536  
 SOLVENT CDCl3  
 NS 64  
 DS 4  
 SWH 30030.029 Hz  
 FIDRES 0.458222 Hz  
 AQ 1.0912410 sec  
 RG 90.5  
 DW 16.650 usec  
 DE 20.00 usec  
 TE 298.0 K  
 D1 2.00000000 sec  
 D11 0.03000000 sec  
 TD0 1

===== CHANNEL f1 =====  
 NUC1 13C  
 P1 10.00 usec  
 PL1 -5.00 dB  
 PL1W 14.29790783 W  
 SFO1 125.7703643 MHz

===== CHANNEL f2 =====  
 CPDPRG2 waltz16  
 NUC2 1H  
 PCPD2 80.00 usec  
 PL2 -4.00 dB  
 PL12 14.06 dB  
 PL13 17.00 dB  
 PL2W 6.30957365 W  
 PL12W 0.09862794 W  
 PL13W 0.05011872 W  
 SFO2 500.1320005 MHz  
 SI 32768  
 SF 125.7578001 MHz  
 WDW EM  
 SSB 0  
 LB 1.00 Hz  
 GB 0  
 PC 0.30

3CF3PhBH2P (n-Bu) 3

## IBB-nmr Analysis

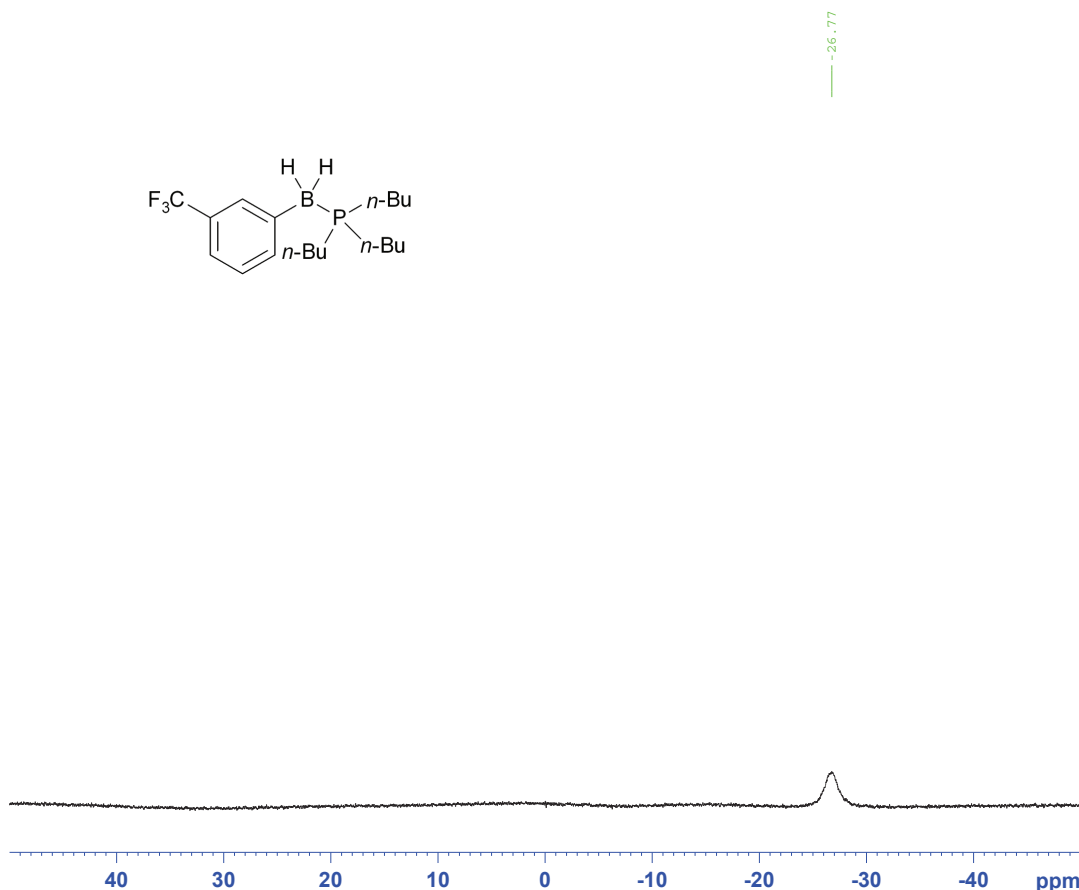

NAME May23-2022  
 EXPNO 5  
 PROCNO 1  
 Date\_ 20220523  
 Time 22.33  
 INSTRUM av400  
 PROBHD 5 mm PABBO BB-  
 PULPROG zgig  
 TD 32768  
 SOLVENT DMSO  
 NS 128  
 DS 4  
 SWH 20000.000 Hz  
 FIDRES 0.610352 Hz  
 AQ 0.8192500 sec  
 RG 203  
 DW 25.000 usec  
 DE 20.00 usec  
 TE 297.6 K  
 D1 1.00000000 sec  
 D11 0.03000000 sec  
 TD0 1

===== CHANNEL f1 =====  
 NUC1 11B  
 P1 6.30 usec  
 PL1 -2.00 dB  
 SFO1 128.3776050 MHz

===== CHANNEL f2 =====  
 CPDPRG2 waltz16  
 NUC2 1H  
 PCPD2 80.00 usec  
 PL2 -1.70 dB  
 PL12 13.80 dB  
 PL2W 14.48987389 W  
 PL12W 0.40838012 W  
 SFO2 400.1316005 MHz  
 SI 32768  
 SF 128.3776183 MHz  
 WDW EM  
 SSB 0  
 LB 2.00 Hz  
 GB 0  
 PC 1.40

3CF3PhBH2P (n-Bu) 3

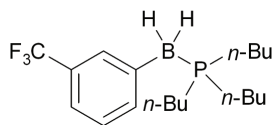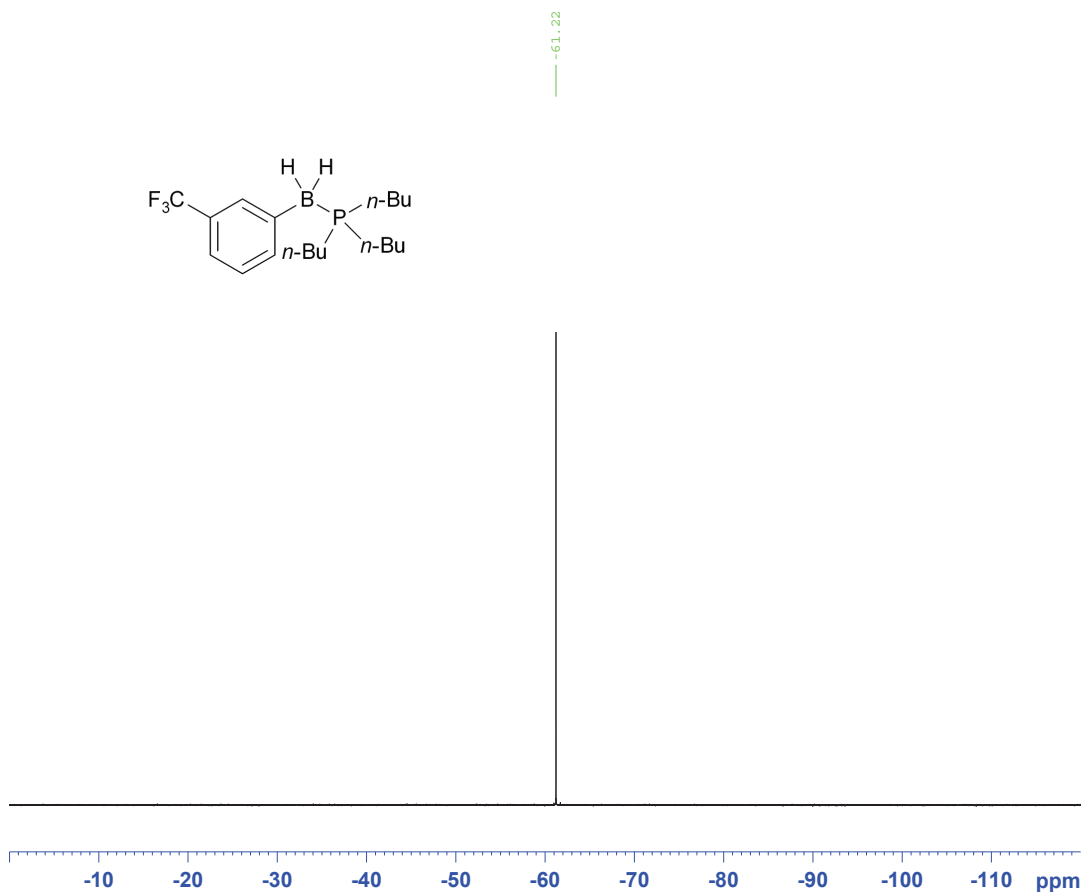

## IBB-nmr Analysis

```
NAME      May23-2022
EXPNO     2
PROCNO    1
Date_     20220523
Time      21.52
INSTRUM   av400
PROBHD    5 mm PABBO BB-
PULPROG   zgfhigqn
TD         131072
SOLVENT   DMSO
NS         8
DS         4
SWH        89285.711 Hz
FIDRES     0.681196 Hz
AQ         0.7340532 sec
RG         203
DW         5.600 usec
DE         6.50 usec
TE         297.0 K
D1         1.00000000 sec
D11        0.03000000 sec
D12        0.00002000 sec
TD0        1
```

```
===== CHANNEL f1 =====
NUC1      19F
P1        19.50 usec
PL1       -4.00 dB
PL1W      16.40489006 W
SFO1      376.4607164 MHz
```

```
===== CHANNEL f2 =====
CPDPRG2   waltz16
NUC2       1H
PCPD2     112.00 usec
PL2       -4.00 dB
PL12      18.00 dB
PL2W      24.60733604 W
PL12W     0.15526180 W
SFO2      400.1316005 MHz
SI         65536
SF         376.4984617 MHz
WDW        EM
SSB        0
LB         0.30 Hz
GB         0
PC         1.00
```

3CF3PhBH2P (n-Bu) 3

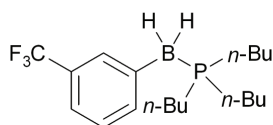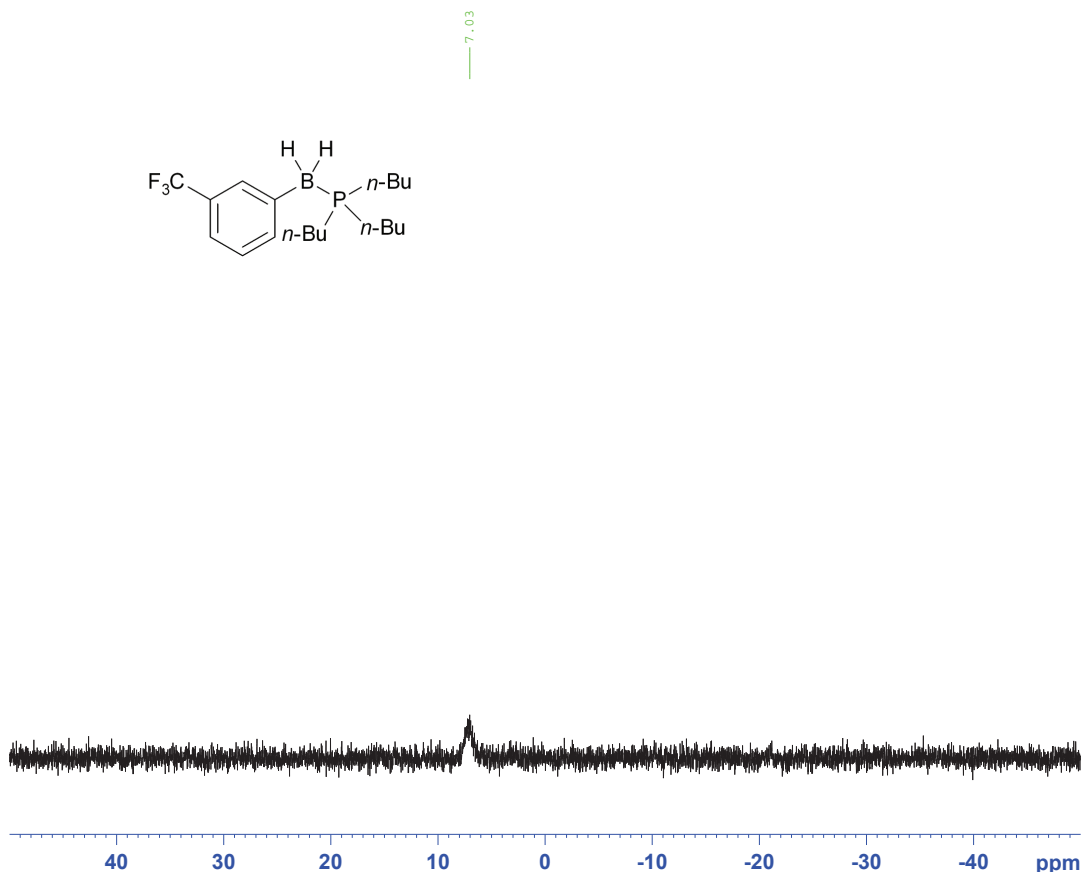

## IBB-nmr Analysis

```
NAME      May23-2022
EXPNO     4
PROCNO    1
Date_     20220523
Time      22.26
INSTRUM   av400
PROBHD    5 mm PABBO BB-
PULPROG   zg30
TD         65536
SOLVENT   DMSO
NS         16
DS         4
SWH        64102.563 Hz
FIDRES     0.978127 Hz
AQ         0.5112308 sec
RG         203
DW         7.800 usec
DE         6.50 usec
TE         296.9 K
D1         2.00000000 sec
TD0        1
```

```
===== CHANNEL f1 =====
NUC1      31P
P1        10.00 usec
PL1       -0.70 dB
PL1W      30.10233498 W
SFO1      161.9674942 MHz
SI         32768
SF         161.9754962 MHz
WDW        EM
SSB        0
LB         1.00 Hz
GB         0
PC         1.40
```

# B-3-(Trifluoromethyl)phenyl tricyclopentylphosphine-borane (24)

3CF3PhBH2PPh (cyclopentyl) 3

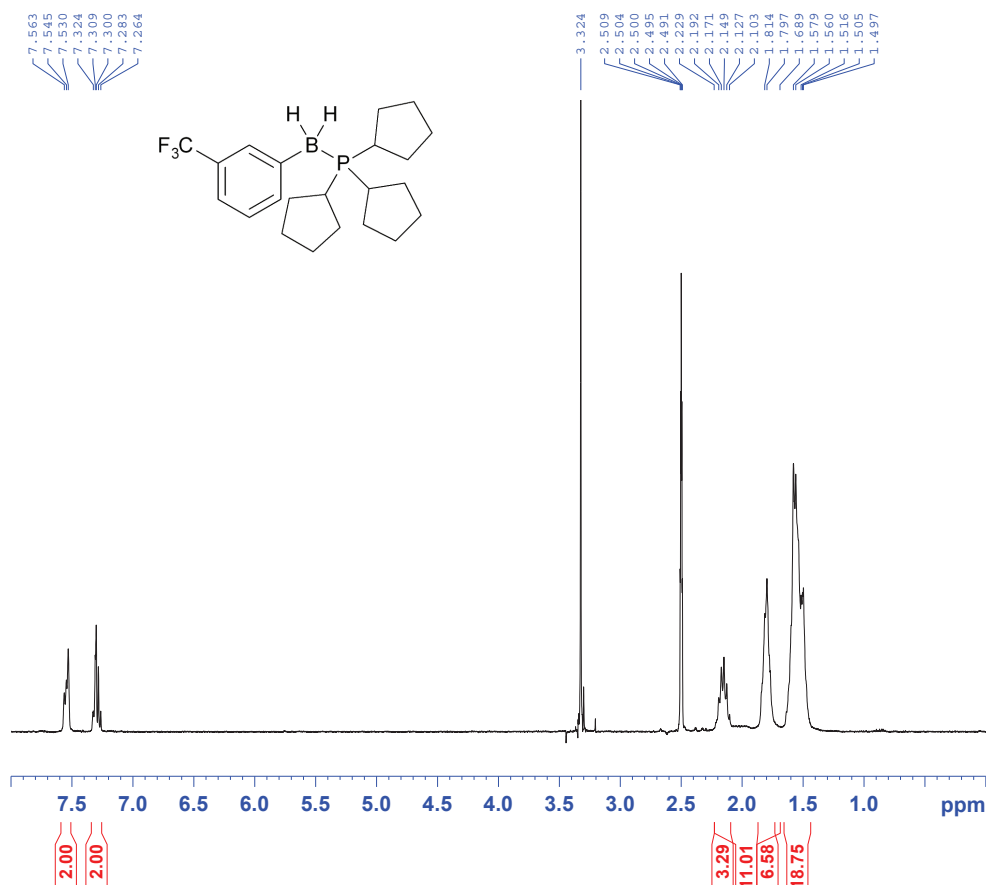

## IBB-nmr Analysis

NAME Apr23-2022  
 EXPNO 1  
 PROCNO 1  
 Date\_ 20220423  
 Time 12.06  
 INSTRUM av400  
 PROBHD 5 mm PABBO BB-  
 PULPROG zg30  
 TD 65536  
 SOLVENT DMSO  
 NS 4  
 DS 2  
 SWH 8223.685 Hz  
 FIDRES 0.125483 Hz  
 AQ 3.9846387 sec  
 RG 203  
 DW 60.800 usec  
 DE 6.50 usec  
 TE 296.7 K  
 D1 1.00000000 sec  
 TD0 1

===== CHANNEL f1 =====  
 NUC1 1H  
 P1 14.00 usec  
 PL1 -1.80 dB  
 PL1W 14.82738590 W  
 SFO1 400.1324710 MHz  
 SI 32768  
 SF 400.1300031 MHz  
 WDW EM  
 SSB 0  
 LB 0.30 Hz  
 GB 0  
 PC 1.00

3CF3PhBH2P (cyclopentyl) 3

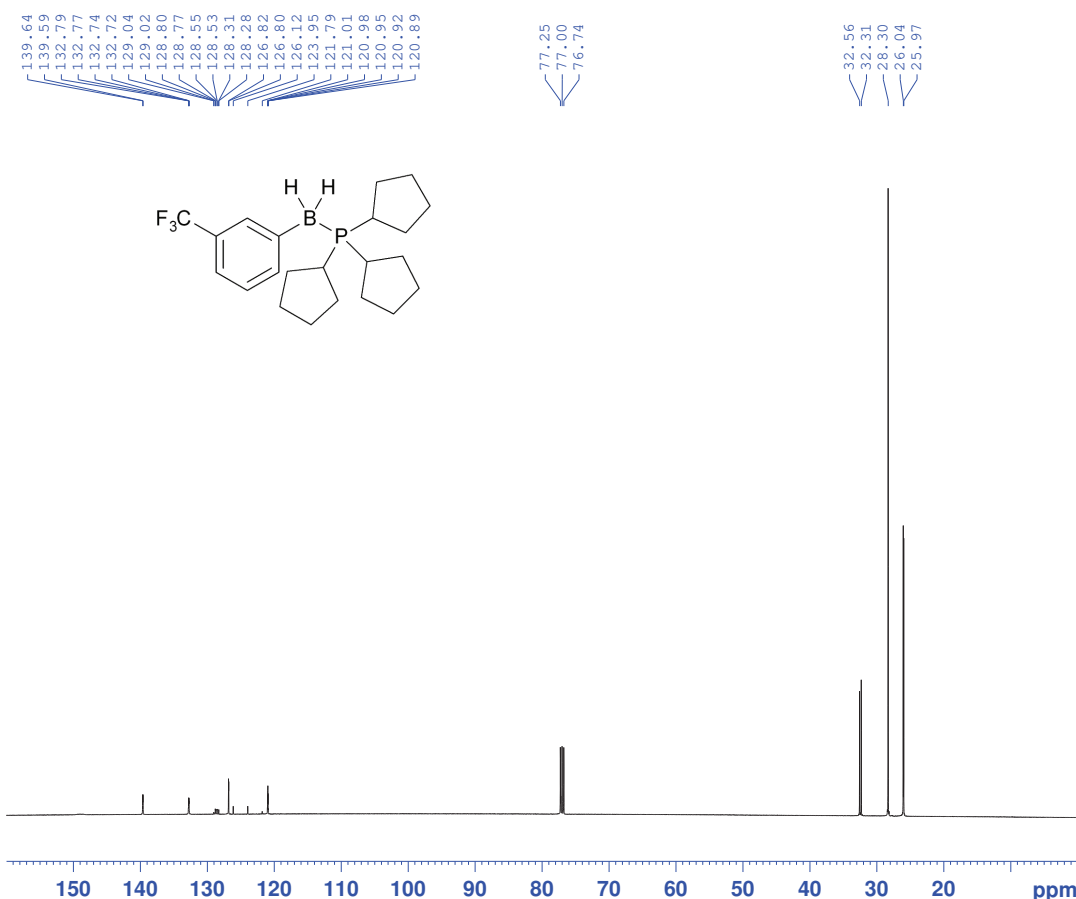

## IBB-nmr Analysis

NAME Mar08-2024  
 EXPNO 2  
 PROCNO 1  
 Date\_ 20240308  
 Time 0.47  
 INSTRUM av500  
 PROBHD 5 mm CPDCH 13C  
 PULPROG zgpg30  
 TD 65536  
 SOLVENT CDCl3  
 NS 64  
 DS 4  
 SWH 30030.029 Hz  
 FIDRES 0.458222 Hz  
 AQ 1.0912410 sec  
 RG 90.5  
 DW 16.650 usec  
 DE 20.00 usec  
 TE 298.0 K  
 D1 2.00000000 sec  
 D11 0.03000000 sec  
 TD0 1

===== CHANNEL f1 =====  
 NUC1 13C  
 P1 10.00 usec  
 PL1 -5.00 dB  
 PL1W 14.29790783 W  
 SFO1 125.7703643 MHz

===== CHANNEL f2 =====  
 CPDPRG2 waltz16  
 NUC2 1H  
 PCPD2 80.00 usec  
 PL2 -4.00 dB  
 PL12 14.06 dB  
 PL13 17.00 dB  
 PL2W 6.30957365 W  
 PL12W 0.09862794 W  
 PL13W 0.05011872 W  
 SFO2 500.1320005 MHz  
 SI 32768  
 SF 125.7577985 MHz  
 WDW EM  
 SSB 0  
 LB 1.00 Hz  
 GB 0  
 PC 0.30



3CF3PhBH2P(cyclopentyl)3

IBB-nmr Analysis

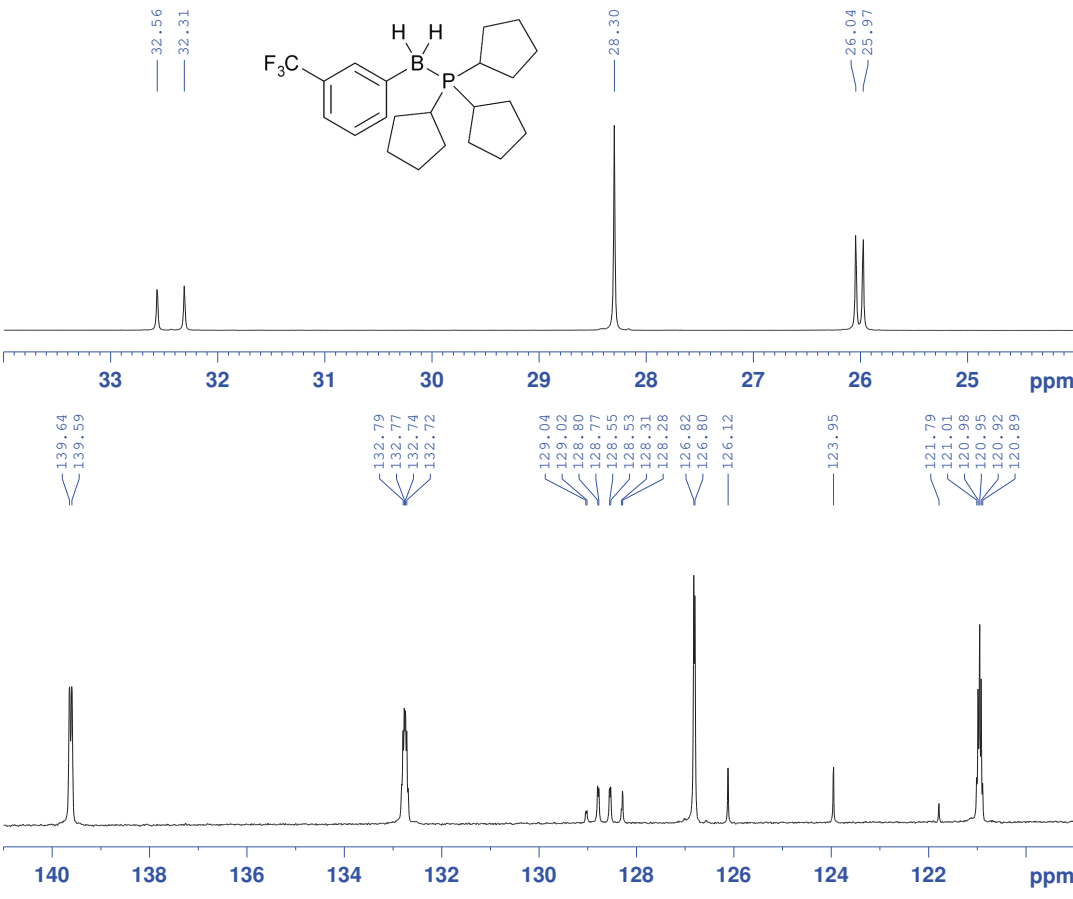

NAME Mar08-2024  
EXPNO 2  
PROCNO 1  
Date\_ 20240308  
Time 0.47  
INSTRUM av500  
PROBHD 5 mm CPDCH 13C  
PULPROG zgpg30  
TD 65536  
SOLVENT CDCl3  
NS 64  
DS 4  
SWH 30030.029 Hz  
FIDRES 0.458222 Hz  
AQ 1.0912410 sec  
RG 90.5  
DW 16.650 usec  
DE 20.00 usec  
TE 298.0 K  
D1 2.00000000 sec  
D11 0.03000000 sec  
TD0 1

===== CHANNEL f1 =====  
NUC1 13C  
P1 10.00 usec  
PL1 -5.00 dB  
PL1W 14.29790783 W  
SFO1 125.7703643 MHz

===== CHANNEL f2 =====  
CPDPRG2 waltz16  
NUC2 1H  
PCPD2 80.00 usec  
PL2 -4.00 dB  
PL12 14.06 dB  
PL13 17.00 dB  
PL2W 6.30957365 W  
PL12W 0.09862794 W  
PL13W 0.05011872 W  
SFO2 500.1320005 MHz  
SI 32768  
SF 125.7577985 MHz  
WDW EM  
SSB 0  
LB 1.00 Hz  
GB 0  
PC 0.30

3CF3PhBH2PPh(cyclopentyl)3

IBB-nmr Analysis

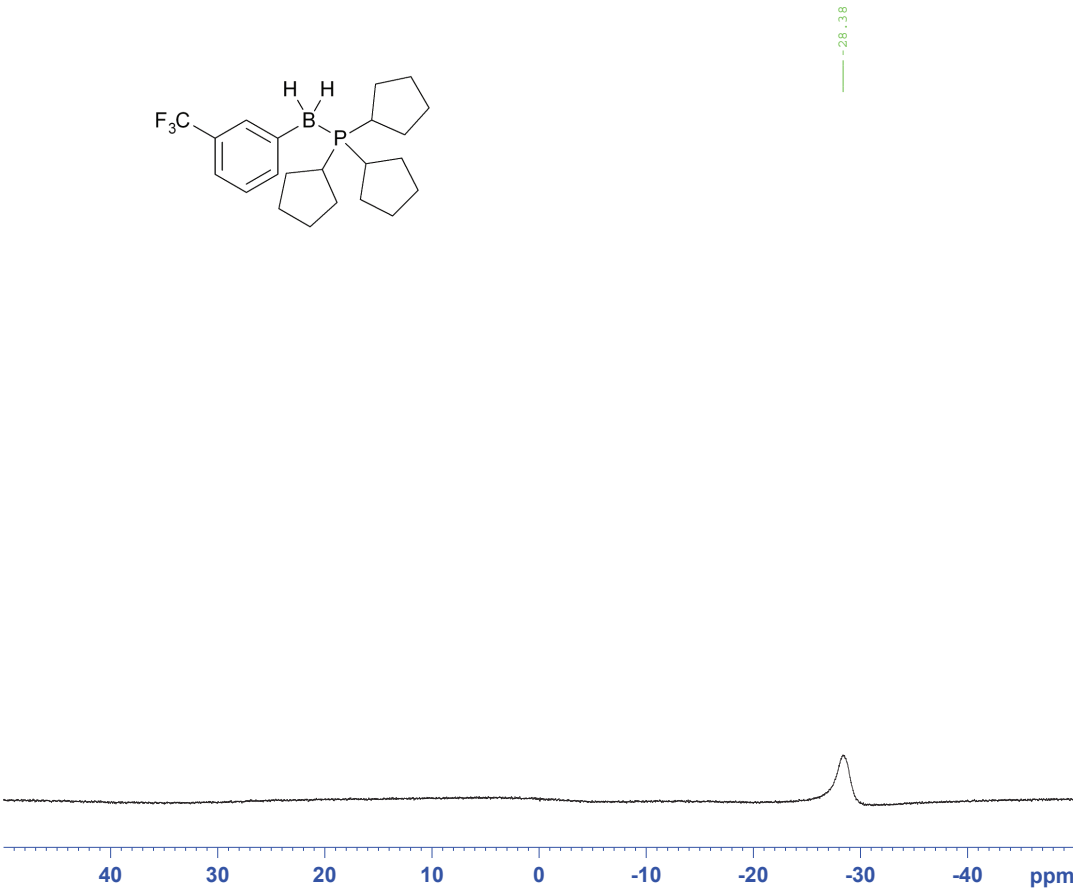

NAME Apr23-2022  
EXPNO 4  
PROCNO 1  
Date\_ 20220423  
Time 12.30  
INSTRUM av400  
PROBHD 5 mm PABBO BB-  
PULPROG zgig  
TD 32768  
SOLVENT DMSO  
NS 256  
DS 4  
SWH 20000.000 Hz  
FIDRES 0.610352 Hz  
AQ 0.8192500 sec  
RG 203  
DW 25.000 usec  
DE 20.00 usec  
TE 297.5 K  
D1 1.00000000 sec  
D11 0.03000000 sec  
TD0 1

===== CHANNEL f1 =====  
NUC1 11B  
P1 6.30 usec  
PL1 -2.00 dB  
SFO1 128.3776050 MHz

===== CHANNEL f2 =====  
CPDPRG2 waltz16  
NUC2 1H  
PCPD2 80.00 usec  
PL2 -1.70 dB  
PL12 13.80 dB  
PL2W 14.48987389 W  
PL12W 0.40838012 W  
SFO2 400.1316005 MHz  
SI 32768  
SF 128.3776183 MHz  
WDW EM  
SSB 0  
LB 2.00 Hz  
GB 0  
PC 1.40

3CF<sub>3</sub>PhBH<sub>2</sub>PPh(cyclopentyl)<sub>3</sub>

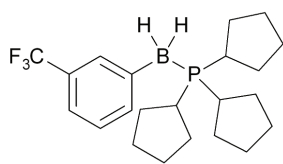

-61.19

## IBB-nmr Analysis

```

NAME      Apr23-2022
EXPNO     3
PROCNO    1
Date_     20220423
Time      12.18
INSTRUM   av400
PROBHD    5 mm PABBO BB-
PULPROG   zgfhigqn
TD         131072
SOLVENT   DMSO
NS         8
DS         4
SWH        89285.711 Hz
FIDRES     0.681196 Hz
AQ         0.7340532 sec
RG         203
DW         5.600 usec
DE         6.50 usec
TE         296.8 K
D1         1.00000000 sec
D11        0.03000000 sec
D12        0.00002000 sec
TD0        1
  
```

```

===== CHANNEL f1 =====
NUC1      19F
P1        19.50 usec
PL1       -4.00 dB
PL1W      16.40489006 W
SFO1      376.4607164 MHz
  
```

```

===== CHANNEL f2 =====
CPDPRG2   waltz16
NUC2       1H
PCPD2      112.00 usec
PL2        -4.00 dB
PL12       18.00 dB
PL2W       24.60733604 W
PL12W      0.15526180 W
SFO2       400.1316005 MHz
SI         65536
SF         376.4984617 MHz
WDW        EM
SSB        0
LB         0.30 Hz
GB         0
PC         1.00
  
```

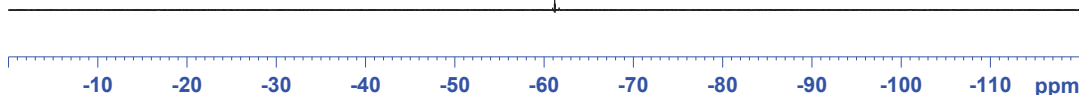

3CF<sub>3</sub>PhBH<sub>2</sub>PPh(cyclopentyl)<sub>3</sub>

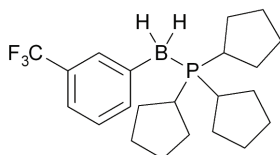

19.12

## IBB-nmr Analysis

```

NAME      Apr23-2022
EXPNO     2
PROCNO    1
Date_     20220423
Time      12.13
INSTRUM   av400
PROBHD    5 mm PABBO BB-
PULPROG   zg30
TD         65536
SOLVENT   DMSO
NS         64
DS         4
SWH        64102.563 Hz
FIDRES     0.978127 Hz
AQ         0.5112308 sec
RG         203
DW         7.800 usec
DE         6.50 usec
TE         296.7 K
D1         2.00000000 sec
D11        0.03000000 sec
D12        0.00002000 sec
TD0        1
  
```

```

===== CHANNEL f1 =====
NUC1      31P
P1        10.00 usec
PL1       -0.70 dB
PL1W      30.10233498 W
SFO1      161.9674942 MHz
SI         32768
SF         161.9754962 MHz
WDW        EM
SSB        0
LB         1.00 Hz
GB         0
PC         1.40
  
```

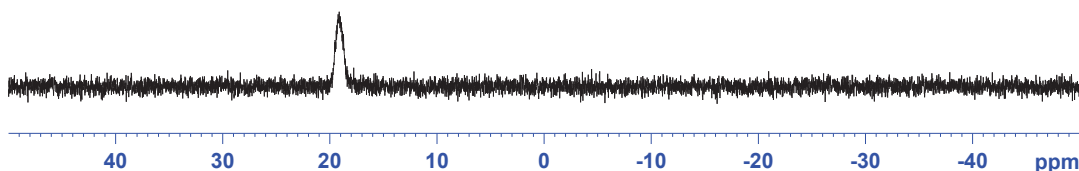

3CF3PhBH2P(cyclohexyl)3

B-3-(Trifluoromethyl)phenyl tricyclohexylphosphine-borane (25)

## IBB-nmr Analysis

NAME Mar23-2022  
 EXPNO 2  
 PROCNO 1  
 Date\_ 20220323  
 Time\_ 20.41  
 INSTRUM av400  
 PROBHD 5 mm PABBO BB-  
 PULPROG zg30  
 TD 65536  
 SOLVENT DMSO  
 NS 16  
 DS 2  
 SWH 8223.685 Hz  
 FIDRES 0.125483 Hz  
 AQ 3.9846387 sec  
 RG 203  
 DW 60.800 usec  
 DE 6.50 usec  
 TE 296.6 K  
 D1 1.00000000 sec  
 TD0 1

===== CHANNEL f1 =====  
 NUC1 1H  
 P1 14.00 usec  
 PL1 -1.80 dB  
 PL1W 14.82738590 W  
 SFO1 400.1324710 MHz  
 SI 32768  
 SF 400.1300029 MHz  
 WDW EM  
 SSB 0  
 LB 0.30 Hz  
 GB 0  
 PC 1.00

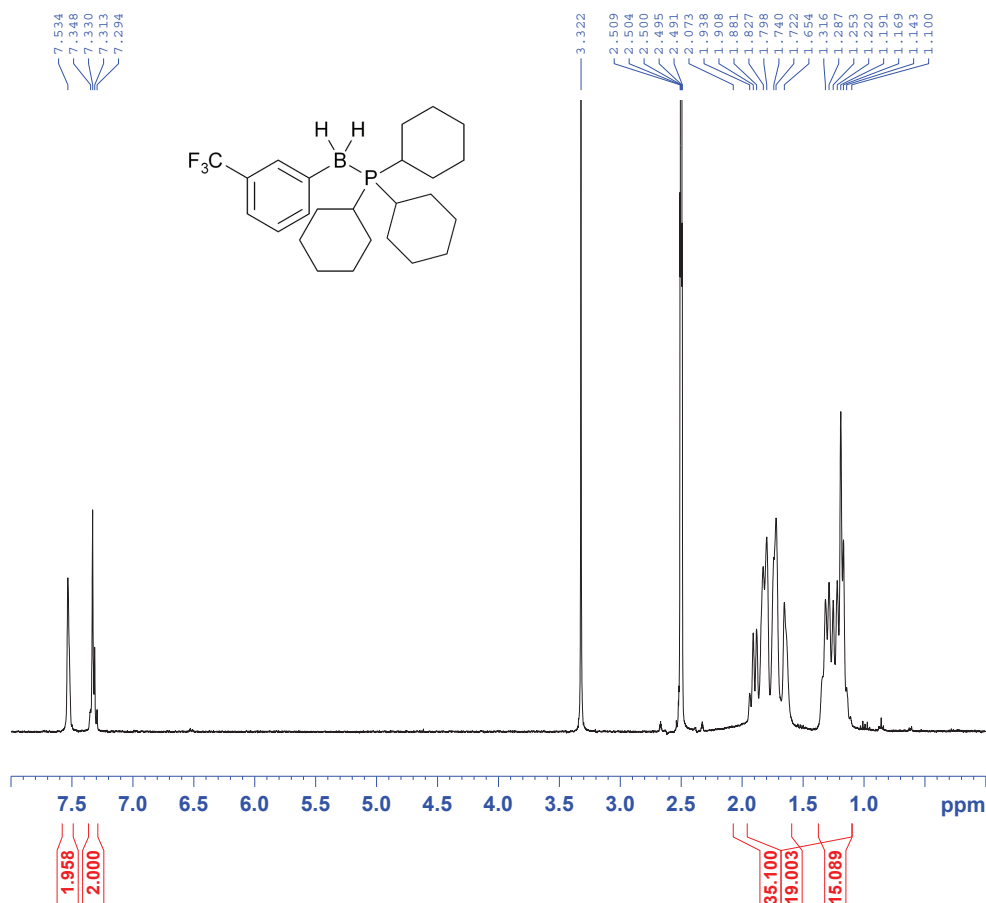

3CF3PhBH2P(cyclohexyl)3

## IBB-nmr Analysis

NAME July30-2022  
 EXPNO 4  
 PROCNO 1  
 Date\_ 20220731  
 Time\_ 4.53  
 INSTRUM av500  
 PROBHD 5 mm CPDCH 13C  
 PULPROG zgpg30  
 TD 65536  
 SOLVENT DMSO  
 NS 8192  
 DS 4  
 SWH 30030.029 Hz  
 FIDRES 0.458222 Hz  
 AQ 1.0912410 sec  
 RG 35.9  
 DW 16.650 usec  
 DE 20.00 usec  
 TE 298.0 K  
 D1 2.00000000 sec  
 D11 0.03000000 sec  
 TD0 1

===== CHANNEL f1 =====  
 NUC1 13C  
 P1 10.00 usec  
 PL1 -5.00 dB  
 PL1W 14.29790783 W  
 SFO1 125.7703643 MHz

===== CHANNEL f2 =====  
 CPDPRG2 waltz16  
 NUC2 1H  
 PCPD2 80.00 usec  
 PL2 -4.00 dB  
 PL12 14.06 dB  
 PL13 17.00 dB  
 PL2W 6.30957365 W  
 PL12W 0.09862794 W  
 PL13W 0.0501872 W  
 SFO2 500.1320005 MHz  
 SI 32768  
 SF 125.7577857 MHz  
 WDW EM  
 SSB 0  
 LB 1.00 Hz  
 GB 0  
 PC 0.30

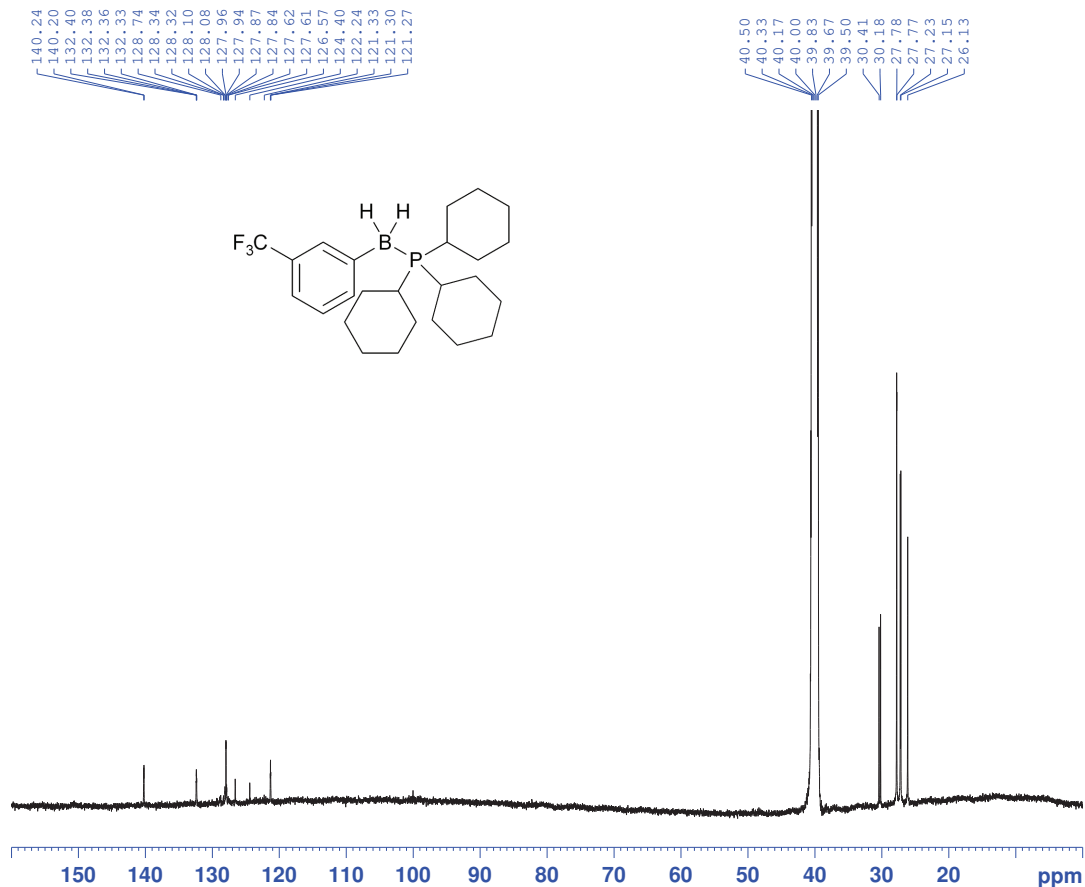

### IBB-nmr Analysis

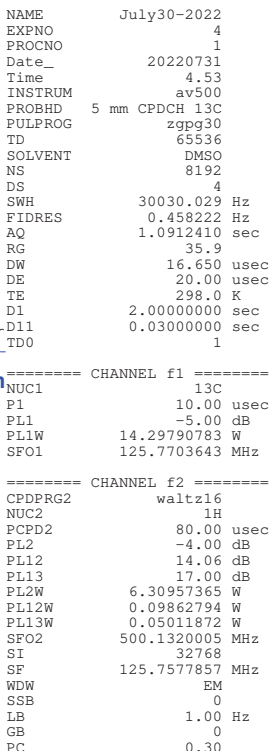

### IBB-nmr Analysis

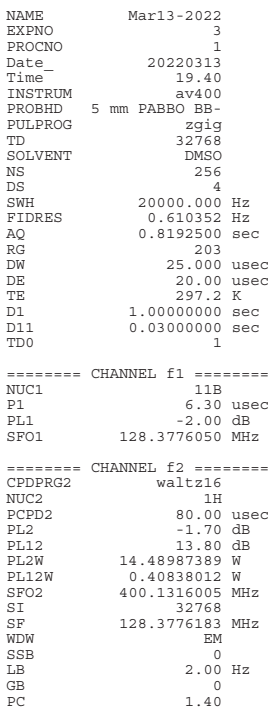

3CF3PhBH2P(cyclohexyl)3

IBB-nmr Analysis

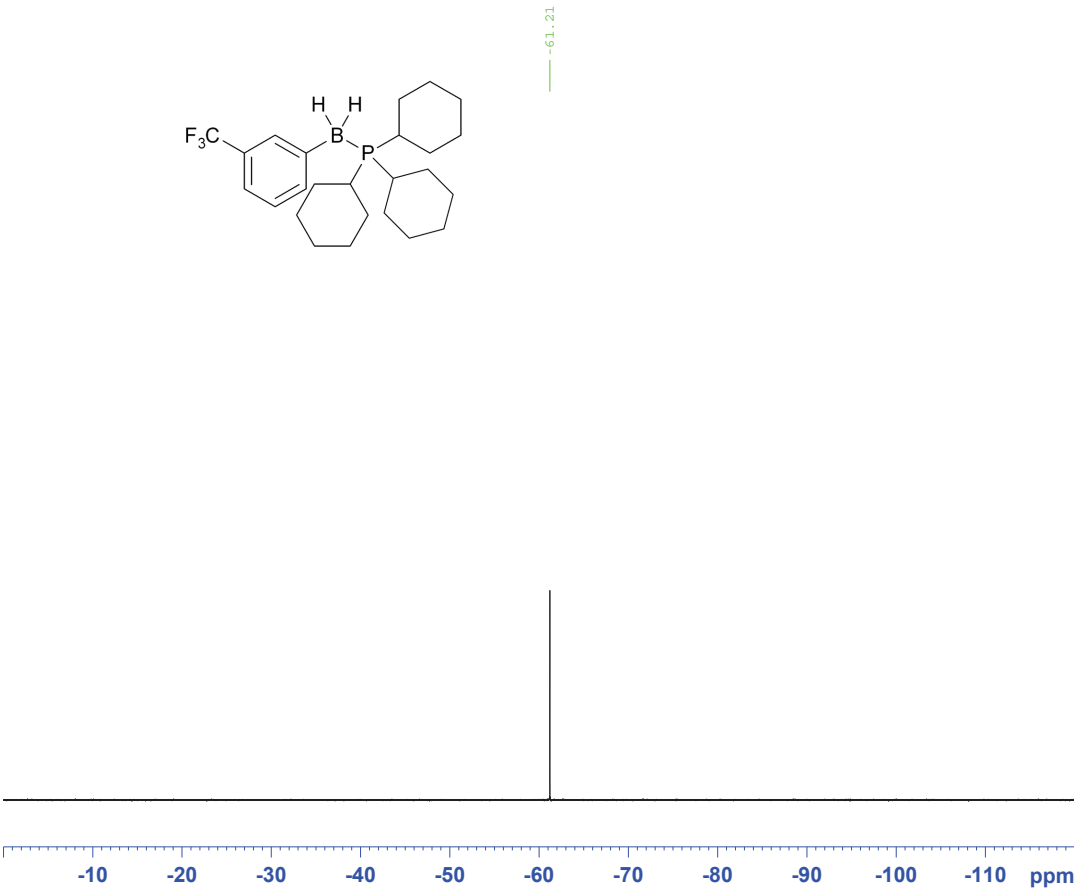

NAME Mar13-2022  
EXPNO 2  
PROCNO 1  
Date\_ 20220313  
Time 19.29  
INSTRUM av400  
PROBHD 5 mm PABBO BB-  
PULPROG zgfhgqn  
TD 131072  
SOLVENT DMSO  
NS 8  
DS 4  
SWH 89285.711 Hz  
FIDRES 0.681196 Hz  
AQ 0.7340532 sec  
RG 203  
DW 5.600 usec  
DE 6.50 usec  
TE 296.7 K  
D1 1.00000000 sec  
D11 0.03000000 sec  
D12 0.00002000 sec  
TD0 1

===== CHANNEL f1 =====  
NUC1 19F  
P1 19.50 usec  
PL1 -4.00 dB  
PL1W 16.40489006 W  
SFO1 376.4607164 MHz

===== CHANNEL f2 =====  
CPDPRG2 waltz16  
NUC2 1H  
PCPD2 112.00 usec  
PL2 -4.00 dB  
PL12 18.00 dB  
PL2W 24.60733604 W  
PL12W 0.15526180 W  
SFO2 400.1316005 MHz  
SI 65536  
SF 376.4984617 MHz  
WDW EM  
SSB 0  
LB 0.30 Hz  
GB 0  
PC 1.00

3CF3PhBH2P(cyclohexyl)3

IBB-nmr Analysis

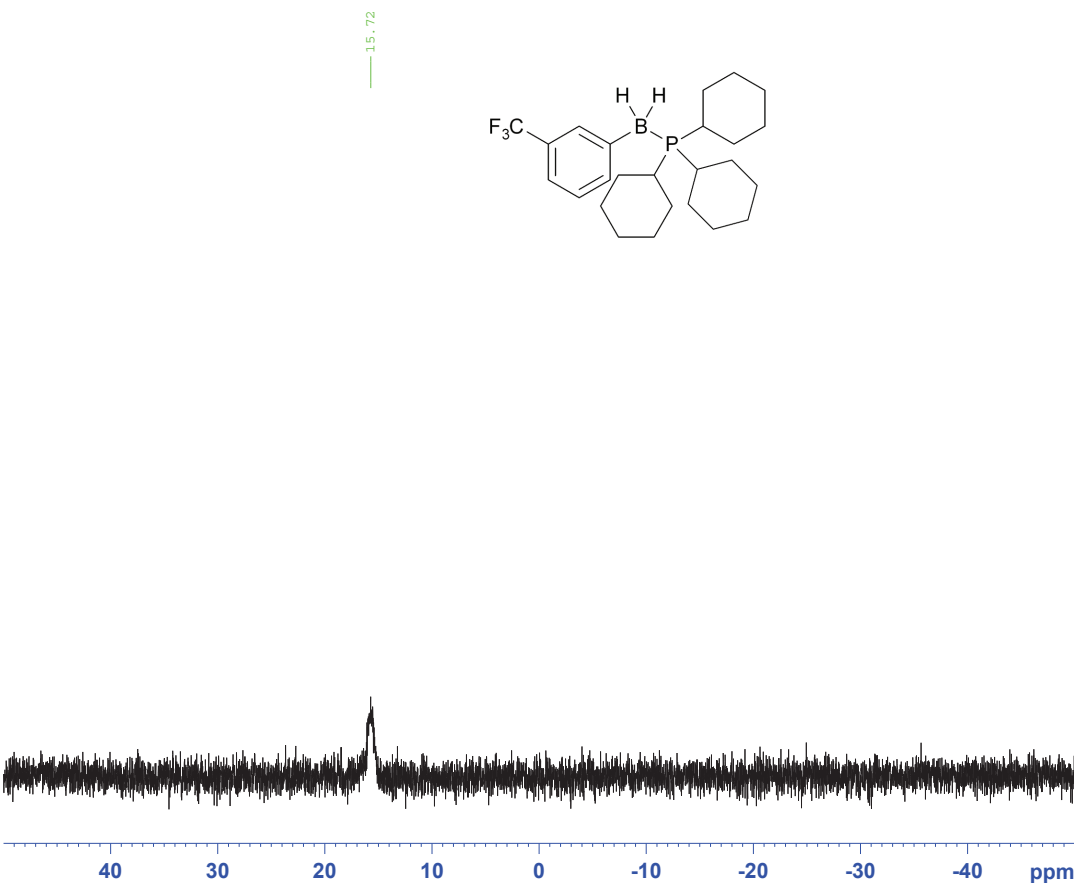

NAME Mar13-2022  
EXPNO 5  
PROCNO 1  
Date\_ 20220313  
Time 20.02  
INSTRUM av400  
PROBHD 5 mm PABBO BB-  
PULPROG zg30  
TD 65536  
SOLVENT DMSO  
NS 256  
DS 4  
SWH 64102.563 Hz  
FIDRES 0.978127 Hz  
AQ 0.5112308 sec  
RG 203  
DW 7.800 usec  
DE 6.50 usec  
TE 296.5 K  
D1 2.00000000 sec  
TD0 1

===== CHANNEL f1 =====  
NUC1 31P  
P1 10.00 usec  
PL1 -0.70 dB  
PL1W 30.10233498 W  
SFO1 161.9674942 MHz  
SI 32768  
SF 161.9754962 MHz  
WDW EM  
SSB 0  
LB 1.00 Hz  
GB 0  
PC 1.40

3CF3PhBH2PH(cyclohexyl) 2 **B-3-(Trifluoromethyl)phenyl dicyclohexylphosphine-borane (26)**

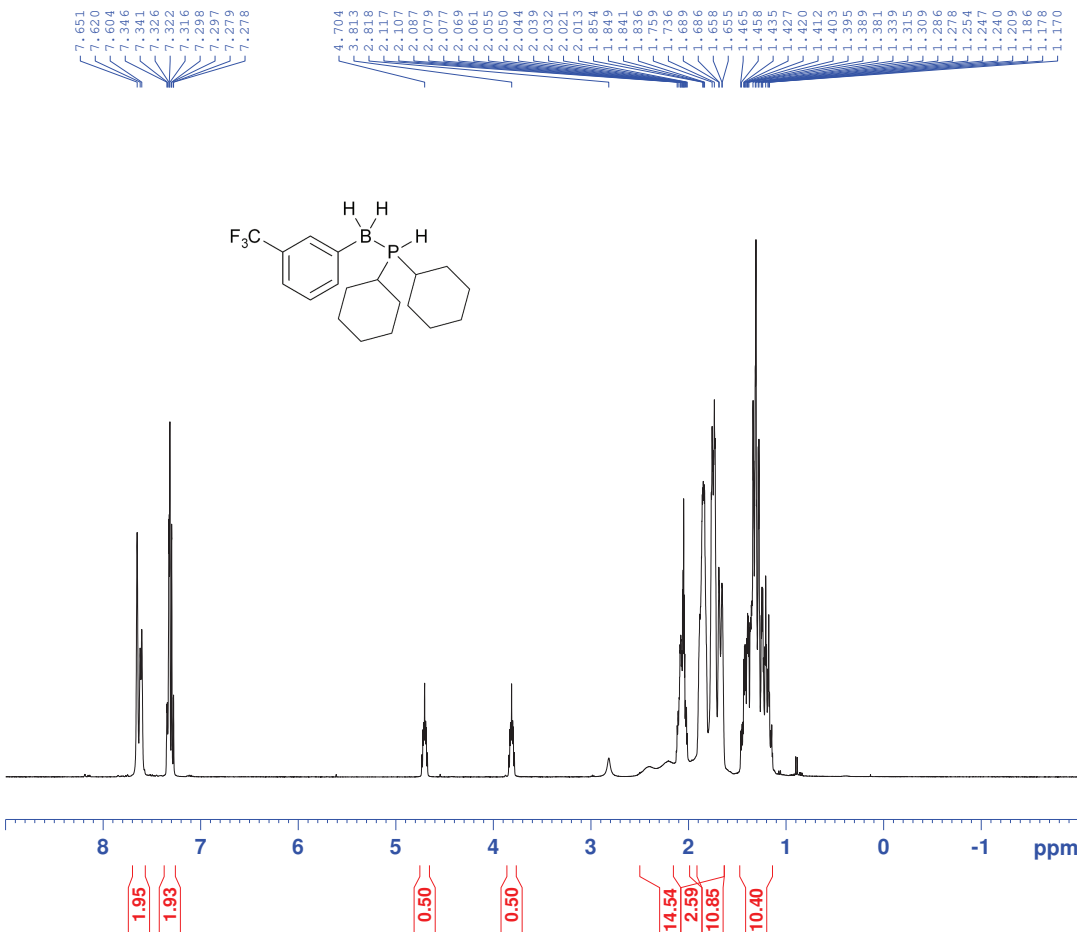

**IBB-nmr Analysis**

NAME Aug12-2023  
EXPNO 2  
PROCNO 1  
Date\_ 20230812  
Time 19.39  
INSTRUM av400  
PROBHD 5 mm PABBO BB-  
PULPROG zg30  
TD 65536  
SOLVENT Acetone  
NS 16  
DS 2  
SWH 8223.685 Hz  
FIDRES 0.125483 Hz  
AQ 3.9846387 sec  
RG 32  
DW 60.800 usec  
DE 6.50 usec  
TE 297.1 K  
D1 1.00000000 sec  
TD0 1

===== CHANNEL f1 =====  
NUC1 1H  
P1 14.00 usec  
PL1 -1.80 dB  
PL1W 14.82738590 W  
SFO1 400.1324710 MHz  
SI 32768  
SF 400.1300070 MHz  
WDW EM  
SSB 0  
LB 0.30 Hz  
GB 0  
PC 1.00

3CF3PhBH2PH(cyclohexyl) 2

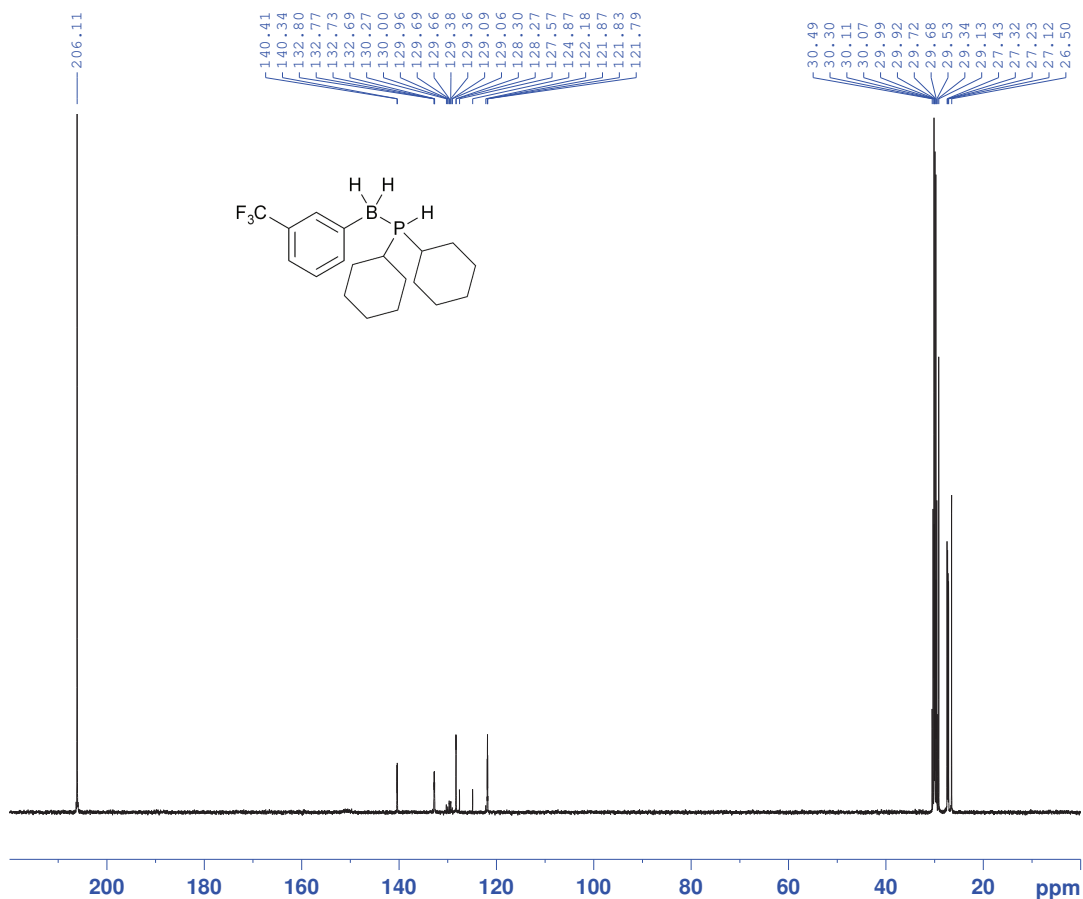

**IBB-nmr Analysis**

NAME Aug12-2023  
EXPNO 3  
PROCNO 1  
Date\_ 20230812  
Time 19.57  
INSTRUM av400  
PROBHD 5 mm PABBO BB-  
PULPROG zgpg30  
TD 65536  
SOLVENT Acetone  
NS 257  
DS 2  
SWH 24038.461 Hz  
FIDRES 0.366798 Hz  
AQ 1.3631988 sec  
RG 128  
DW 20.800 usec  
DE 6.50 usec  
TE 298.4 K  
D1 2.00000000 sec  
D11 0.03000000 sec  
TD0 1

===== CHANNEL f1 =====  
NUC1 13C  
P1 9.00 usec  
PL1 -3.00 dB  
PL1W 73.17333984 W  
SFO1 100.6228298 MHz

===== CHANNEL f2 =====  
CPDPRG2 waltz16  
NUC2 1H  
PCPD2 80.00 usec  
PL2 -1.70 dB  
PL12 13.80 dB  
PL13 13.80 dB  
PL2W 14.49887389 W  
PL12W 0.40838012 W  
PL13W 0.40838012 W  
SFO2 400.1316005 MHz  
SI 32768  
SF 100.6126724 MHz  
WDW EM  
SSB 0  
LB 1.00 Hz  
GB 0  
PC 0.30

3CF3PhBH2PH (cyclohexyl) 2

## IBB-nmr Analysis

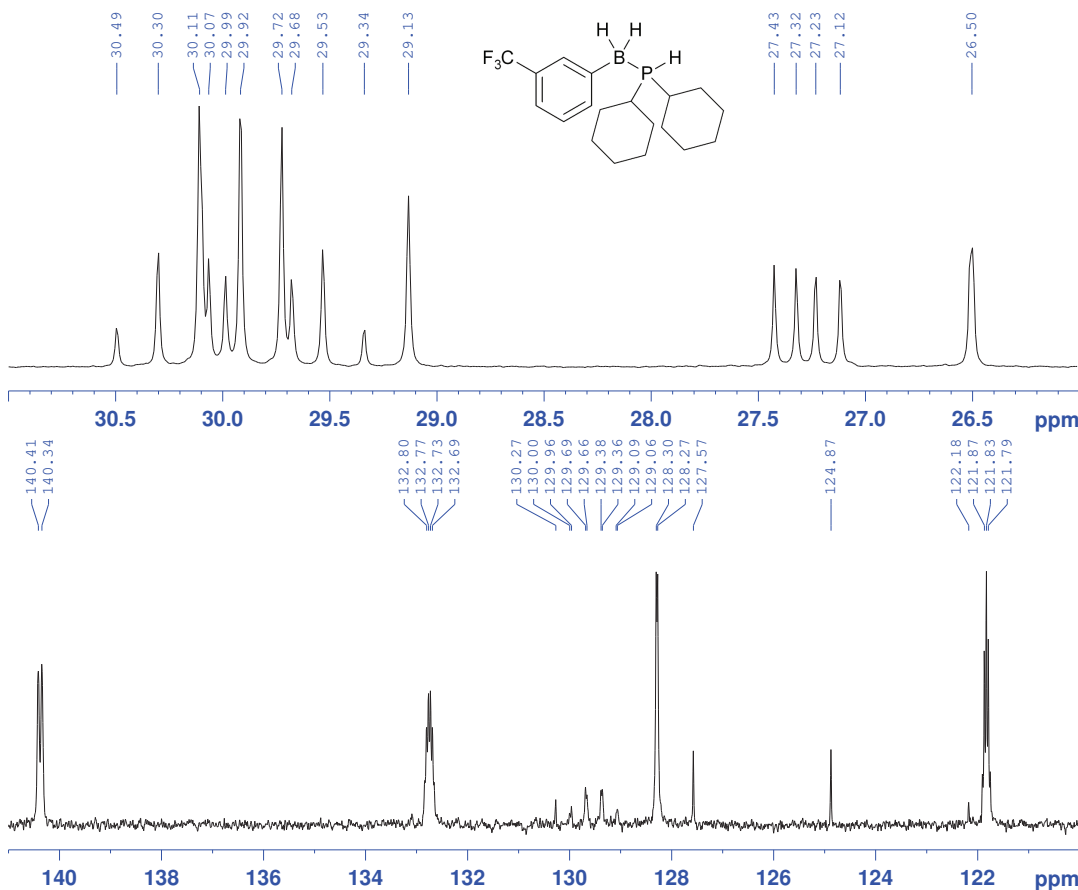

NAME Aug12-2023  
EXPNO 3  
PROCNO 1  
Date\_ 20230812  
Time 19.57  
INSTRUM av400  
PROBHD 5 mm PABBO BB-  
PULPROG zgpg30  
TD 65536  
SOLVENT Acetone  
NS 257  
DS 2  
SWH 24038.461 Hz  
FIDRES 0.366798 Hz  
AQ 1.3631988 sec  
RG 128  
DW 20.800 usec  
DE 6.50 usec  
TE 298.4 K  
D1 2.00000000 sec  
D11 0.03000000 sec  
TD0 1

===== CHANNEL f1 =====  
NUC1 13C  
P1 9.00 usec  
PL1 -3.00 dB  
PL1W 73.17333984 W  
SFO1 100.6228298 MHz

===== CHANNEL f2 =====  
CPDPRG2 waltz16  
NUC2 1H  
PCPD2 80.00 usec  
PL2 -1.70 dB  
PL12 13.80 dB  
PL13 13.80 dB  
PL2W 14.48987389 W  
PL12W 0.40838012 W  
PL13W 0.40838012 W  
SFO2 400.1316005 MHz  
SI 32768  
SF 100.6126724 MHz  
WDW EM  
SSB 0  
LB 1.00 Hz  
GB 0  
PC 0.30

3CF3PhBH2PH (cyclohexyl) 2

## IBB-nmr Analysis

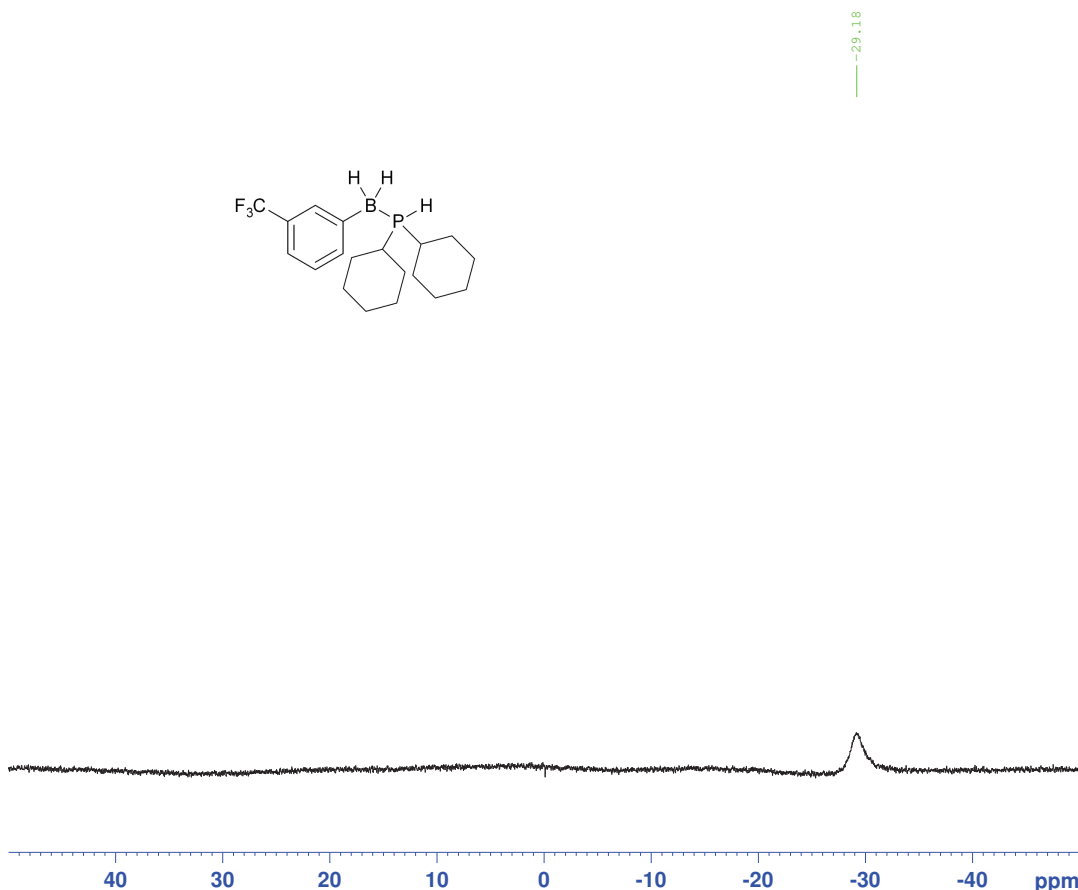

NAME Jul127-2023  
EXPNO 4  
PROCNO 1  
Date\_ 20230727  
Time 9.26  
INSTRUM av400  
PROBHD 5 mm PABBO BB-  
PULPROG zgig  
TD 32768  
SOLVENT DMSO  
NS 64  
DS 4  
SWH 20000.000 Hz  
FIDRES 0.610352 Hz  
AQ 0.8192500 sec  
RG 203  
DW 25.000 usec  
DE 20.00 usec  
TE 297.1 K  
D1 1.00000000 sec  
D11 0.03000000 sec  
TD0 1

===== CHANNEL f1 =====  
NUC1 11B  
P1 6.30 usec  
PL1 -2.00 dB  
SFO1 128.3776050 MHz

===== CHANNEL f2 =====  
CPDPRG2 waltz16  
NUC2 1H  
PCPD2 80.00 usec  
PL2 -1.70 dB  
PL12 13.80 dB  
PL2W 14.48987389 W  
PL12W 0.40838012 W  
SFO2 400.1316005 MHz  
SI 32768  
SF 128.3776183 MHz  
WDW EM  
SSB 0  
LB 2.00 Hz  
GB 0  
PC 1.40

3CF3PhBH2PH(cyclohexyl) 2

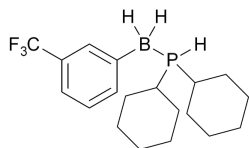

-61.12

## IBB-nmr Analysis

```

NAME          Jul127-2023
EXPNO         5
PROCNO        1
Date_         20230727
Time          9.30
INSTRUM       av400
PROBHD        5 mm PABBO BB-
PULPROG       zgfhigqn
TD            131072
SOLVENT       DMSO
NS            8
DS            4
SWH           89285.711 Hz
FIDRES        0.681196 Hz
AQ            0.7340532 sec
RG            203
DW            5.600 usec
DE            6.50 usec
TE            296.7 K
D1            1.00000000 sec
D11           0.03000000 sec
D12           0.00002000 sec
TD0           1
  
```

```

===== CHANNEL f1 =====
NUC1          19F
P1            19.50 usec
PL1           -4.00 dB
PL1W          16.40489006 W
SFO1          376.4607164 MHz
  
```

```

===== CHANNEL f2 =====
CPDPRG2       waltz16
NUC2          1H
PCPD2         112.00 usec
PL2           -4.00 dB
PL12          18.00 dB
PL2W          24.60733604 W
PL12W         0.15526180 W
SFO2          400.1316005 MHz
SI            65536
SF            376.4984617 MHz
WDW           EM
SSB           0
LB            0.30 Hz
GB            0
PC            1.00
  
```

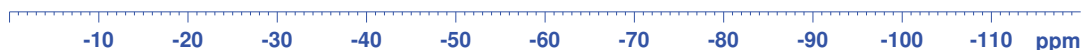

3CF3PhBH2PH(cyclohexyl) 2

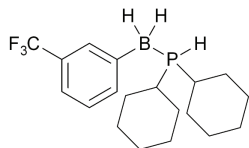

11.05  
8.87

## IBB-nmr Analysis

```

NAME          Jul127-2023
EXPNO         3
PROCNO        1
Date_         20230727
Time          9.21
INSTRUM       av400
PROBHD        5 mm PABBO BB-
PULPROG       zg30
TD            65536
SOLVENT       DMSO
NS            64
DS            4
SWH           64102.563 Hz
FIDRES        0.978127 Hz
AQ            0.5112308 sec
RG            203
DW            7.800 usec
DE            6.50 usec
TE            296.6 K
D1            2.00000000 sec
TD0           1
  
```

```

===== CHANNEL f1 =====
NUC1          31P
P1            10.00 usec
PL1           -0.70 dB
PL1W          30.10233498 W
SFO1          161.9674942 MHz
SI            32768
SF            161.9754962 MHz
WDW           EM
SSB           0
LB            1.00 Hz
GB            0
PC            1.40
  
```

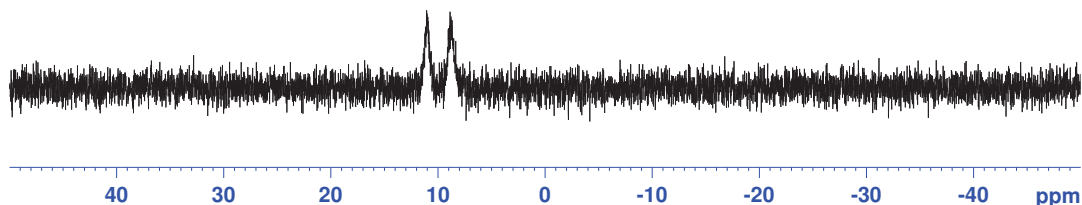



3CF<sub>3</sub>PhBH<sub>2</sub>P (NMe<sub>2</sub>)<sub>3</sub>

B-3-(Trifluoromethyl)phenyl tris(dimethylamino)phosphine-borane (27)

## IBB-nmr Analysis

NAME July18-2022  
 EXPNO 2  
 PROCNO 1  
 Date\_ 20220718  
 Time 17.37  
 INSTRUM av400  
 PROBHD 5 mm PABBO BB-  
 PULPROG zg30  
 TD 65536  
 SOLVENT DMSO  
 NS 4  
 DS 2  
 SWH 8223.685 Hz  
 FIDRES 0.125483 Hz  
 AQ 3.9846387 sec  
 RG 203  
 DW 60.800 usec  
 DE 6.50 usec  
 TE 297.2 K  
 D1 1.00000000 sec  
 TD0 1

===== CHANNEL f1 =====  
 NUC1 1H  
 P1 14.00 usec  
 PL1 -1.80 dB  
 PL1W 14.82738590 W  
 SFO1 400.1324710 MHz  
 SI 32768  
 SF 400.1300034 MHz  
 WDW EM  
 SSB 0  
 LB 0.30 Hz  
 GB 0  
 PC 1.00

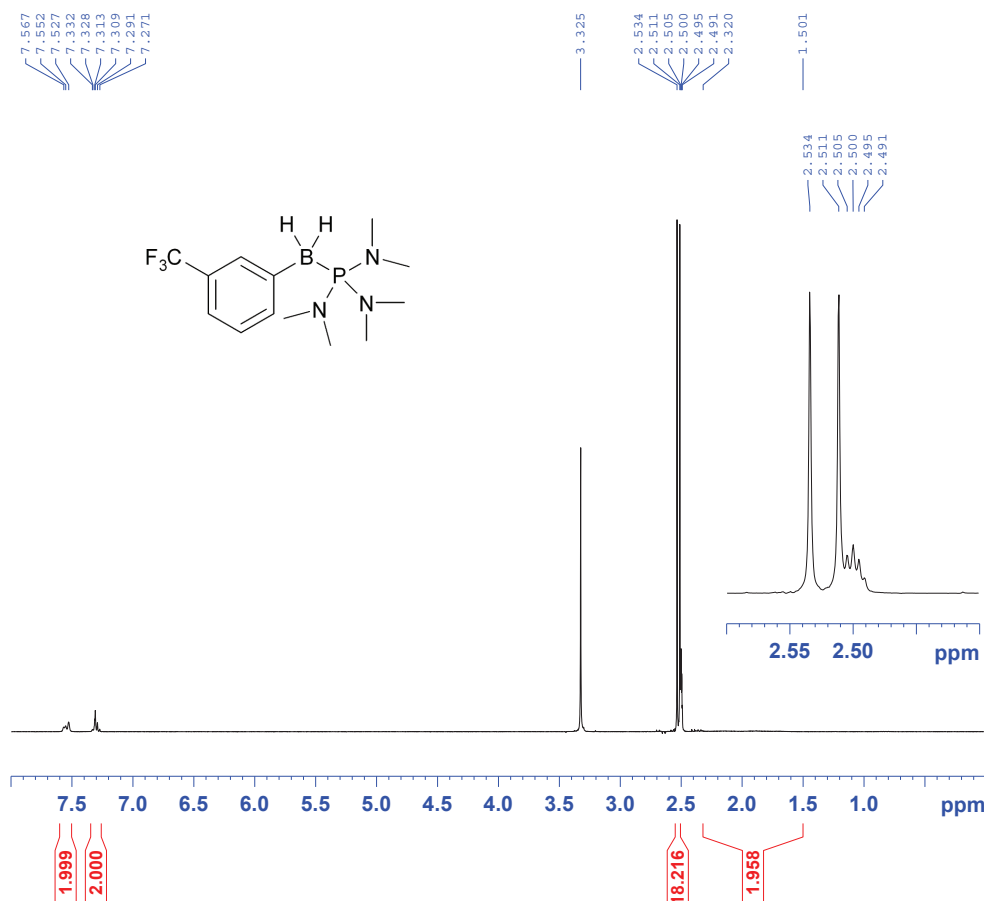3CF<sub>3</sub>PhBH<sub>2</sub>P (NMe<sub>2</sub>)<sub>3</sub>

## IBB-nmr Analysis

NAME July18-2022  
 EXPNO 6  
 PROCNO 1  
 Date\_ 20220718  
 Time 21.37  
 INSTRUM av500  
 PROBHD 5 mm CPDCH 13C  
 PULPROG zgpg30  
 TD 65536  
 SOLVENT DMSO  
 NS 4096  
 DS 4  
 SWH 30030.029 Hz  
 FIDRES 0.458222 Hz  
 AQ 1.0912410 sec  
 RG 35.9  
 DW 16.650 usec  
 DE 20.00 usec  
 TE 298.0 K  
 D1 2.00000000 sec  
 D11 0.03000000 sec  
 TD0 1

===== CHANNEL f1 =====  
 NUC1 13C  
 P1 10.00 usec  
 PL1 -5.00 dB  
 PL1W 14.29790783 W  
 SFO1 125.7703643 MHz

===== CHANNEL f2 =====  
 CPDPRG2 waltz16  
 NUC2 1H  
 PCPD2 80.00 usec  
 PL2 -4.00 dB  
 PL12 14.06 dB  
 PL13 17.00 dB  
 PL2W 6.30857365 W  
 PL12W 0.09862794 W  
 PL13W 0.05011872 W  
 SFO2 500.1320005 MHz  
 SI 32768  
 SF 125.7577866 MHz  
 WDW EM  
 SSB 0  
 LB 1.00 Hz  
 GB 0  
 PC 0.30

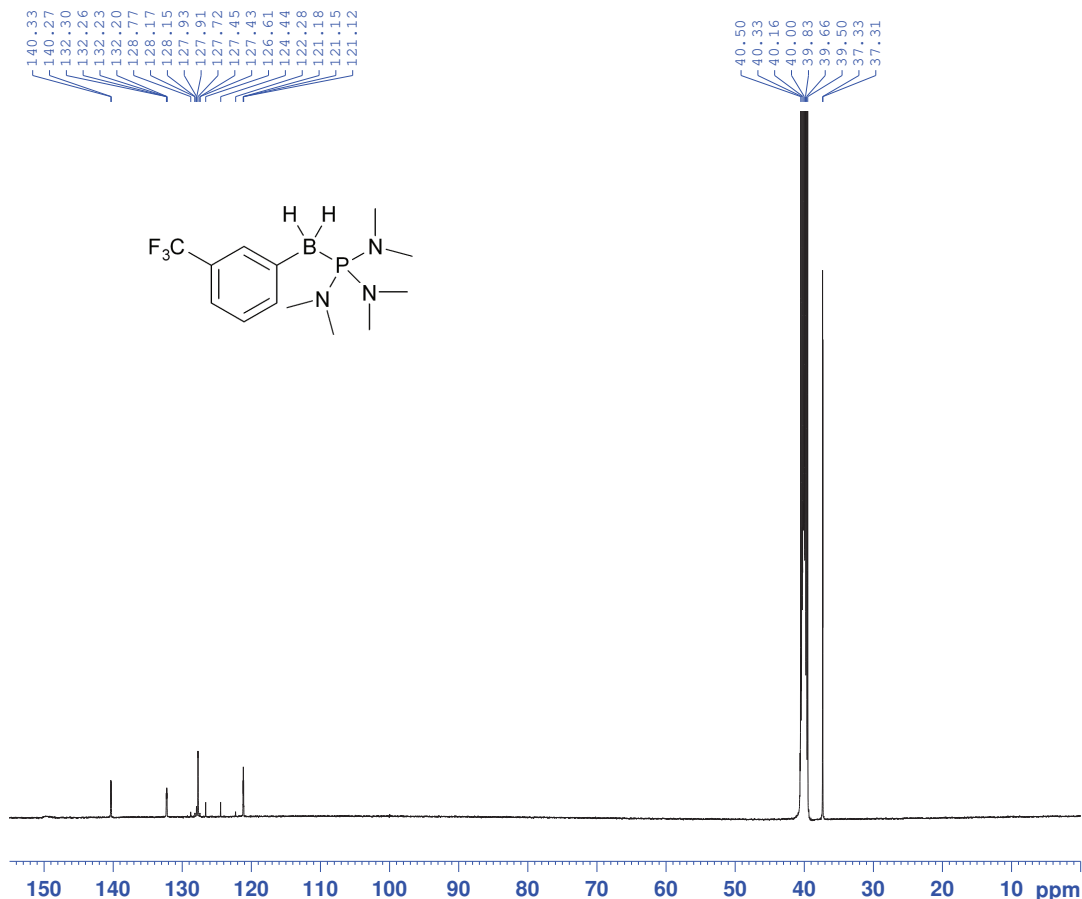

3CF3PhBH2P (NMe2) 3

IBB-nmr Analysis

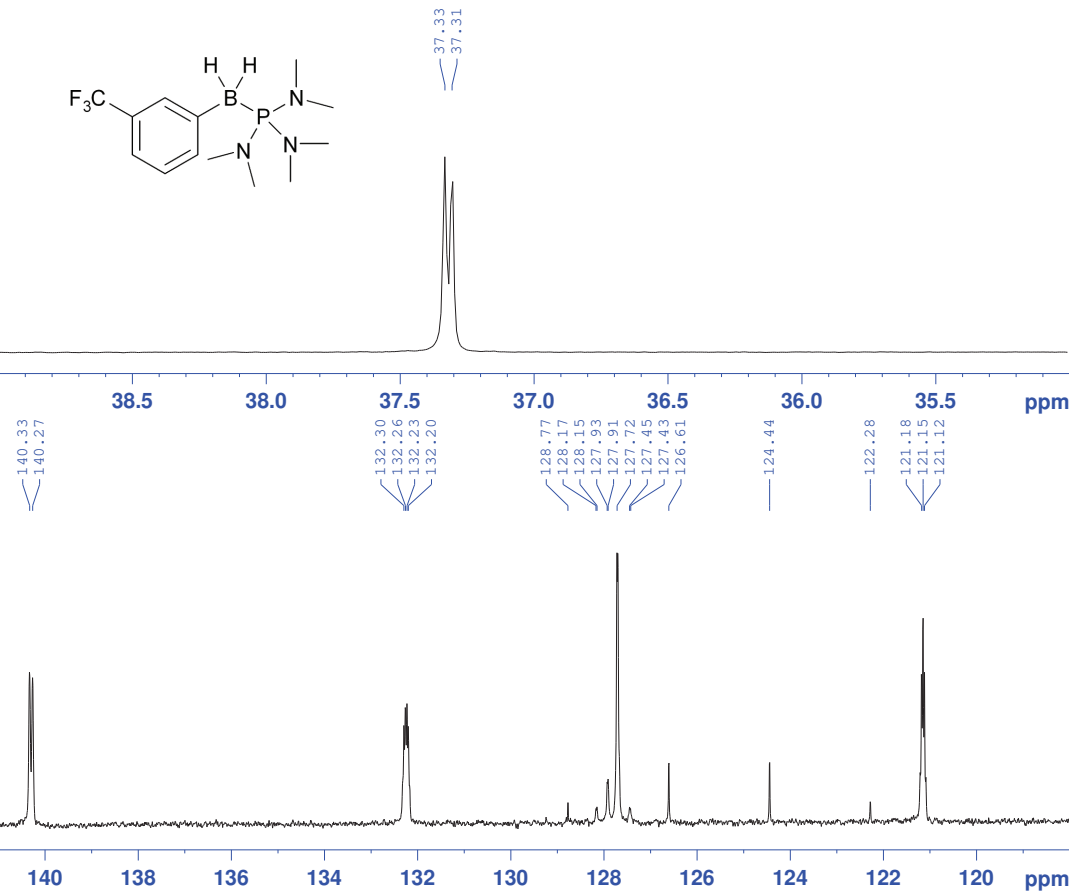

NAME July18-2022  
EXPNO 6  
PROCNO 1  
Date\_ 20220718  
Time 21.37  
INSTRUM av500  
PROBHD 5 mm CPDCH 13C  
PULPROG zgpg30  
TD 65536  
SOLVENT DMSO  
NS 4096  
DS 4  
SWH 30030.029 Hz  
FIDRES 0.458222 Hz  
AQ 1.0912410 sec  
RG 35.9  
DW 16.650 usec  
DE 20.00 usec  
TE 298.0 K  
D1 2.00000000 sec  
D11 0.03000000 sec  
TD0 1

===== CHANNEL f1 =====  
NUC1 13C  
P1 10.00 usec  
PL1 -5.00 dB  
PL1W 14.29790783 W  
SFO1 125.7703643 MHz

===== CHANNEL f2 =====  
CPDPRG2 waltz16  
NUC2 1H  
PCPD2 80.00 usec  
PL2 -4.00 dB  
PL12 14.06 dB  
PL13 17.00 dB  
PL2W 6.30957365 W  
PL12W 0.09862794 W  
PL13W 0.05011872 W  
SFO2 500.1320005 MHz  
SI 32768  
SF 125.7577866 MHz  
WDFW EM  
SSB 0  
LB 1.00 Hz  
GB 0  
PC 0.30

3CF3PhBH2P (NMe2) 3

IBB-nmr Analysis

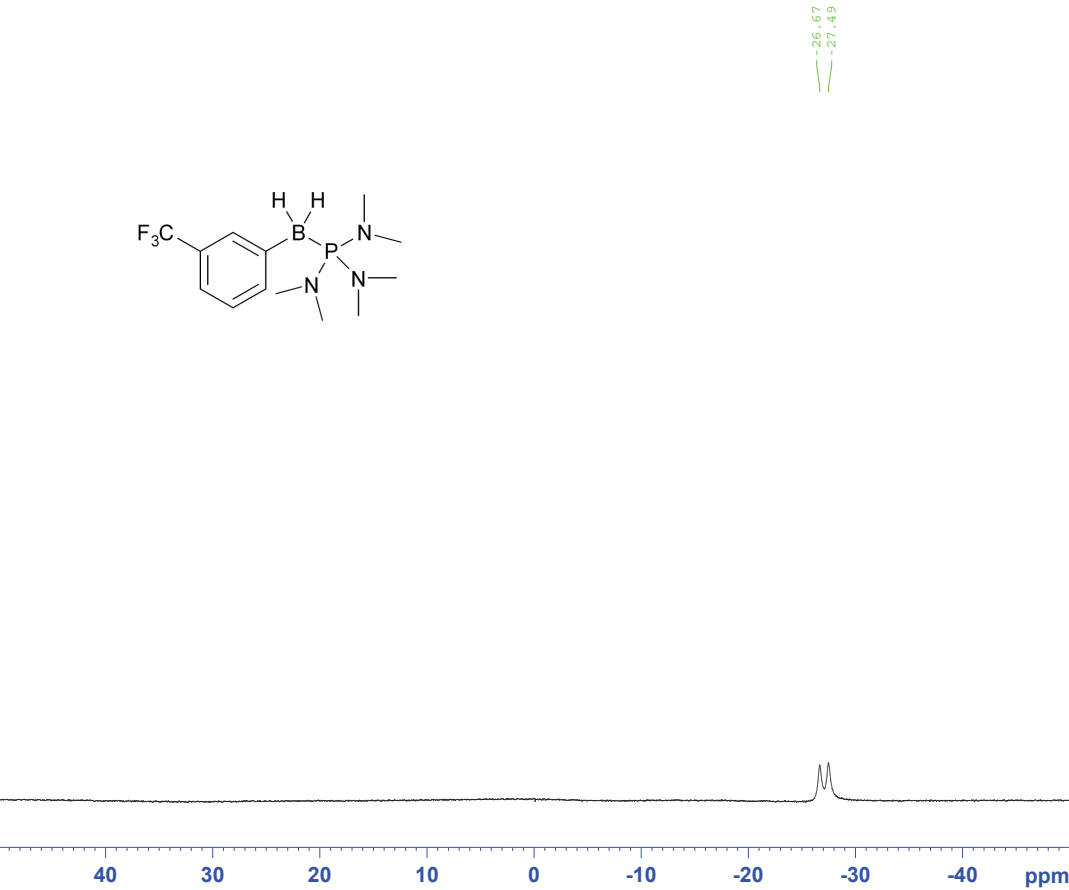

NAME July18-2022  
EXPNO 5  
PROCNO 1  
Date\_ 20220718  
Time 17.52  
INSTRUM av400  
PROBHD 5 mm PABBO BB-  
PULPROG zgig  
TD 32768  
SOLVENT DMSO  
NS 128  
DS 4  
SWH 20000.000 Hz  
FIDRES 0.610352 Hz  
AQ 0.8192500 sec  
RG 203  
DW 25.000 usec  
DE 20.00 usec  
TE 297.7 K  
D1 1.00000000 sec  
D11 0.03000000 sec  
TD0 1

===== CHANNEL f1 =====  
NUC1 11B  
P1 6.30 usec  
PL1 -2.00 dB  
SFO1 128.3776050 MHz

===== CHANNEL f2 =====  
CPDPRG2 waltz16  
NUC2 1H  
PCPD2 80.00 usec  
PL2 -1.70 dB  
PL12 13.80 dB  
PL2W 14.48987389 W  
PL12W 0.40838012 W  
SFO2 400.1316005 MHz  
SI 32768  
SF 128.3776183 MHz  
WDFW EM  
SSB 0  
LB 2.00 Hz  
GB 0  
PC 1.40

3CF<sub>3</sub>PhBH<sub>2</sub>P(NMe<sub>2</sub>)<sub>3</sub>

## IBB-nmr Analysis

```

NAME      July18-2022
EXPNO     4
PROCNO    1
Date_     20220718
Time      17.45
INSTRUM   av400
PROBHD    5 mm PABBO BB-
PULPROG   zgfhigqn
TD         131072
SOLVENT   DMSO
NS         8
DS         4
SWH        89285.711 Hz
FIDRES     0.681196 Hz
AQ         0.7340532 sec
RG         203
DW         5.600 usec
DE         6.50 usec
TE         297.2 K
D1         1.00000000 sec
D11        0.03000000 sec
D12        0.00002000 sec
TD0        1
  
```

```

===== CHANNEL f1 =====
NUC1       19F
P1         19.50 usec
PL1        -4.00 dB
PL1W       16.40489006 W
SFO1       376.4607164 MHz
  
```

```

===== CHANNEL f2 =====
CPDPRG2    waltz16
NUC2        1H
PCPD2      112.00 usec
PL2         -4.00 dB
PL12        18.00 dB
PL2W       24.60733604 W
PL12W      0.15526180 W
SFO2       400.1316005 MHz
SI          65536
SF         376.4984617 MHz
WDW         EM
SSB         0
LB          0.30 Hz
GB          0
PC          1.00
  
```

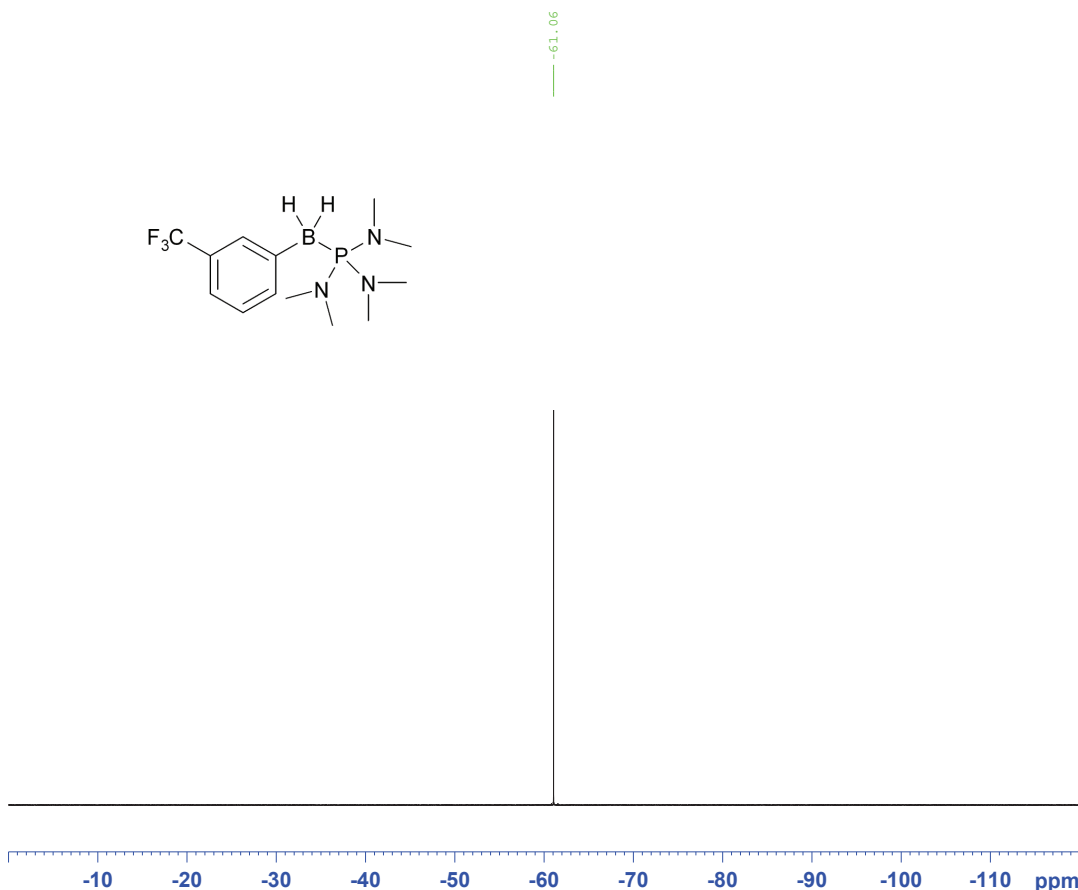

3CF<sub>3</sub>PhBH<sub>2</sub>P(NMe<sub>2</sub>)<sub>3</sub>

## IBB-nmr Analysis

```

NAME      July18-2022
EXPNO     3
PROCNO    1
Date_     20220718
Time      17.42
INSTRUM   av400
PROBHD    5 mm PABBO BB-
PULPROG   zg30
TD         65536
SOLVENT   DMSO
NS         64
DS         4
SWH        64102.563 Hz
FIDRES     0.978127 Hz
AQ         0.5112308 sec
RG         203
DW         7.800 usec
DE         6.50 usec
TE         297.1 K
D1         2.00000000 sec
D11        0.03000000 sec
D12        0.00002000 sec
TD0        1
  
```

```

===== CHANNEL f1 =====
NUC1       31P
P1         10.00 usec
PL1        -0.70 dB
PL1W       30.10233498 W
SFO1       161.9674942 MHz
SI         32768
SF         161.9754962 MHz
WDW         EM
SSB         0
LB          1.00 Hz
GB          0
PC          1.40
  
```

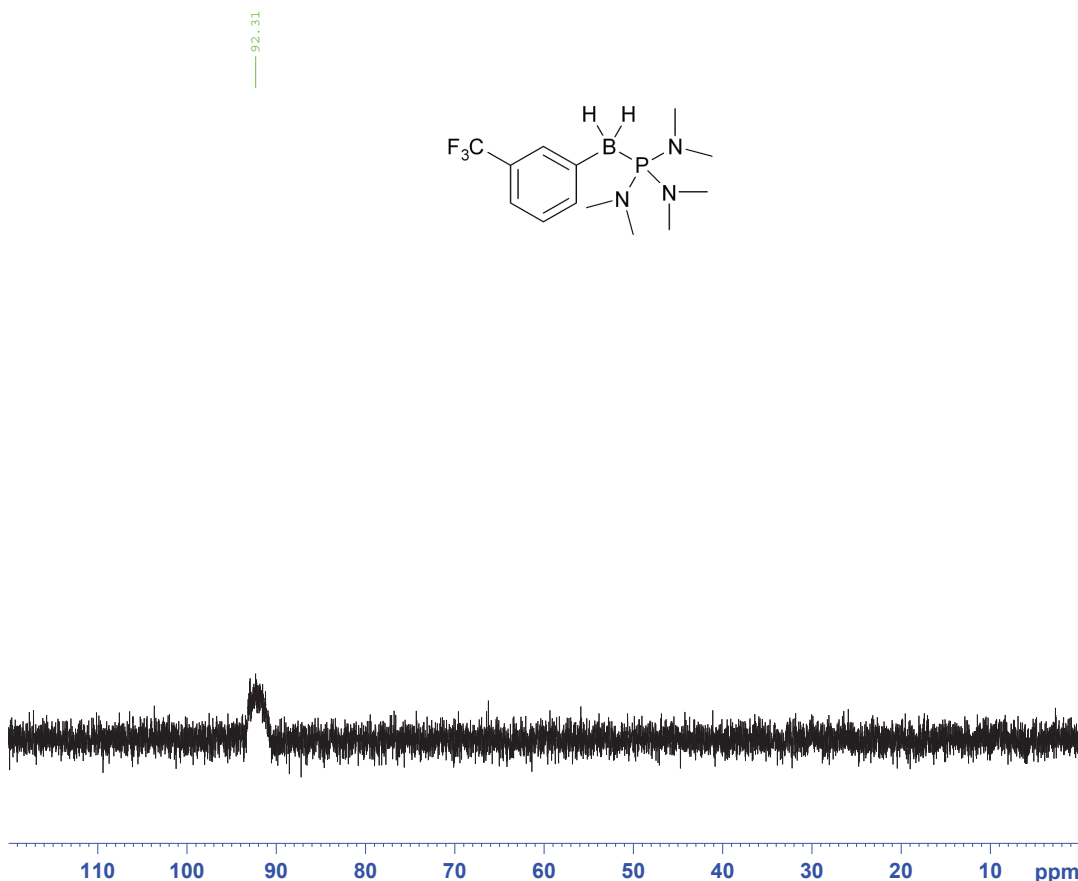

4CF3PhBH2PMe3 5-14Fr

## B-4-(Trifluoromethyl)phenyl trimethylphosphine-borane (28)

## IBB-nmr Analysis

NAME Dec6-2021  
 EXPNO 1  
 PROCNO 1  
 Date\_ 20211206  
 Time\_ 20.49  
 INSTRUM av400  
 PROBHD 5 mm PABBO BB-  
 PULPROG zg30  
 TD 65536  
 SOLVENT DMSO  
 NS 16  
 DS 2  
 SWH 8223.685 Hz  
 FIDRES 0.125483 Hz  
 AQ 3.9846387 sec  
 RG 203  
 DW 60.800 usec  
 DE 6.50 usec  
 TE 296.6 K  
 D1 1.00000000 sec  
 TD0 1

===== CHANNEL f1 =====  
 NUC1 1H  
 P1 14.00 usec  
 PL1 -1.80 dB  
 PL1W 14.82738590 W  
 SFO1 400.1324710 MHz  
 SI 32768  
 SF 400.1300035 MHz  
 WDW EM  
 SSB 0  
 LB 0.30 Hz  
 GB 0  
 PC 1.00

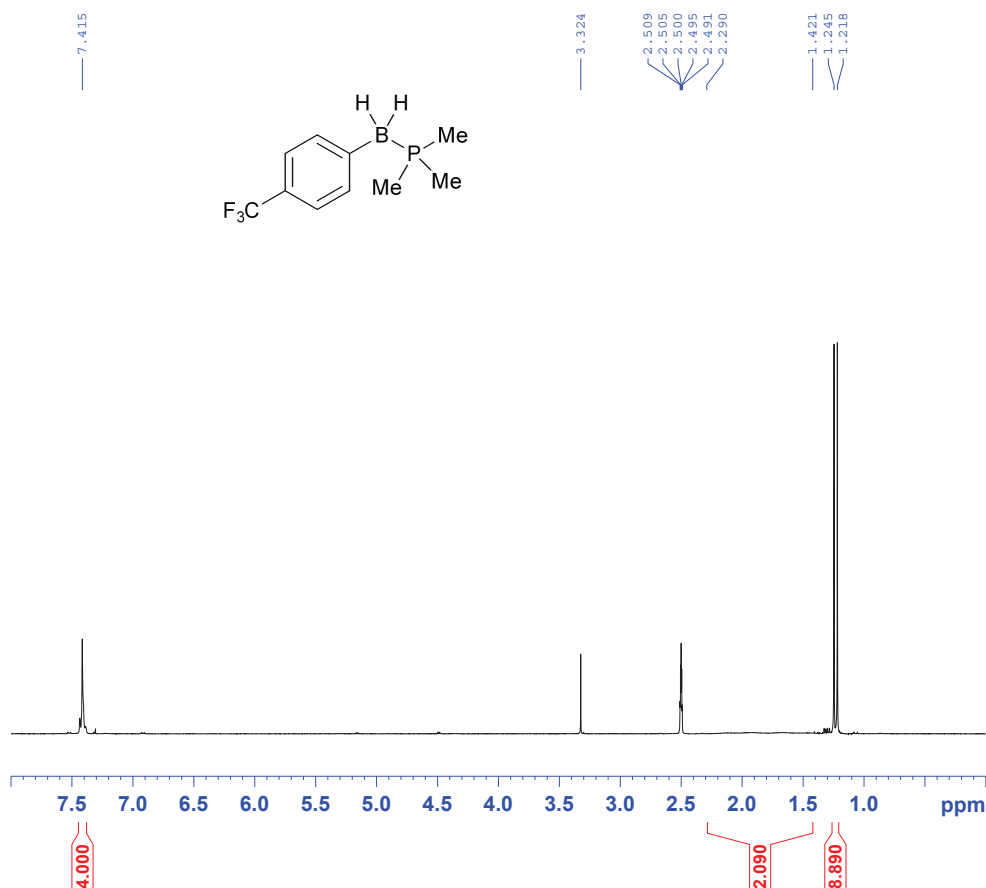

4CF3PhBH2PMe3

## IBB-nmr Analysis

NAME Mar07-2024  
 EXPNO 2  
 PROCNO 1  
 Date\_ 20240307  
 Time\_ 12.21  
 INSTRUM av500  
 PROBHD 5 mm CPDCH 13C  
 PULPROG zgpg30  
 TD 65536  
 SOLVENT CDCl3  
 NS 1024  
 DS 4  
 SWH 30030.029 Hz  
 FIDRES 0.458222 Hz  
 AQ 1.0912410 sec  
 RG 90.5  
 DW 16.650 usec  
 DE 20.00 usec  
 TE 297.9 K  
 D1 2.00000000 sec  
 D11 0.03000000 sec  
 TD0 1

===== CHANNEL f1 =====  
 NUC1 13C  
 P1 10.00 usec  
 PL1 -5.00 dB  
 PL1W 14.29790783 W  
 SFO1 125.7703643 MHz

===== CHANNEL f2 =====  
 CPDPRG2 waltz16  
 NUC2 1H  
 PCPD2 80.00 usec  
 PL2 -4.00 dB  
 PL12 14.06 dB  
 PL13 17.00 dB  
 PL2W 6.30857365 W  
 PL12W 0.09862794 W  
 PL13W 0.05011872 W  
 SFO2 500.1320005 MHz  
 SI 32768  
 SF 125.7577937 MHz  
 WDW EM  
 SSB 0  
 LB 1.00 Hz  
 GB 0  
 PC 0.30

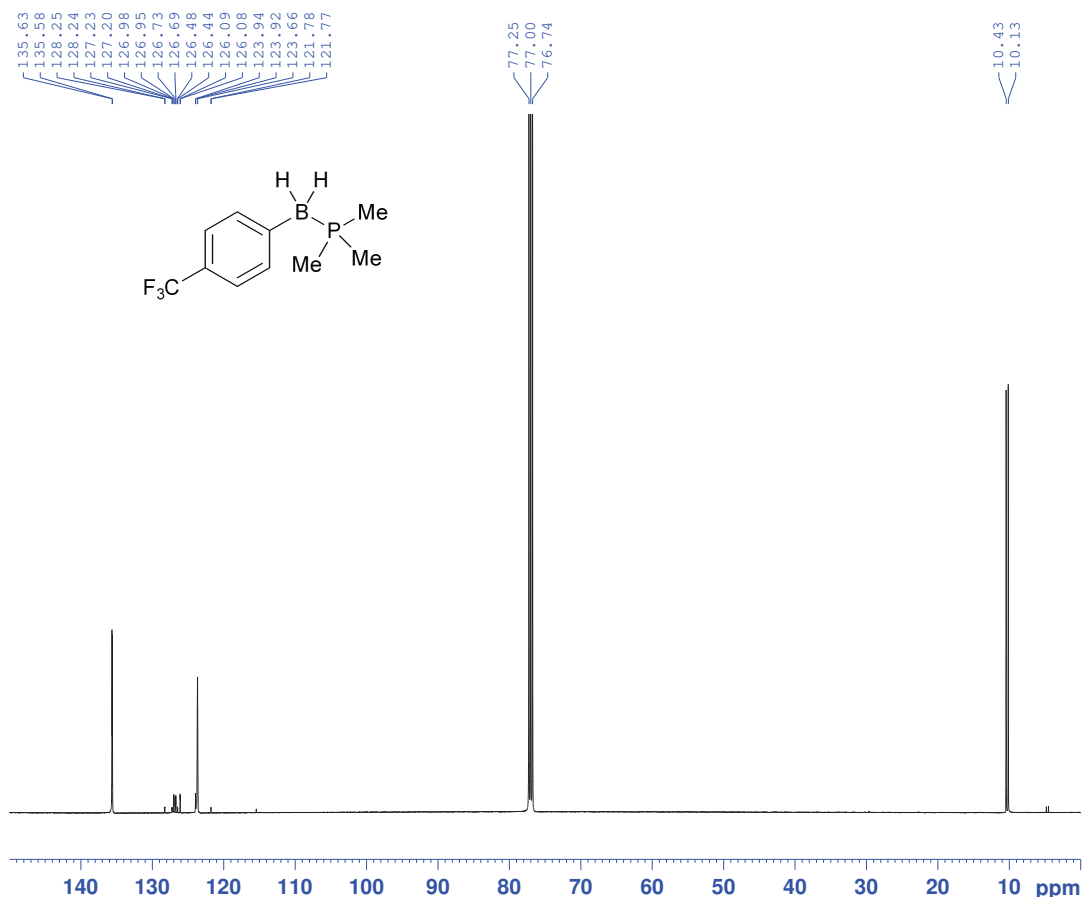

4CF3PhBH2PMe3

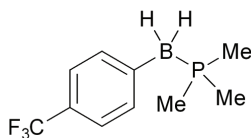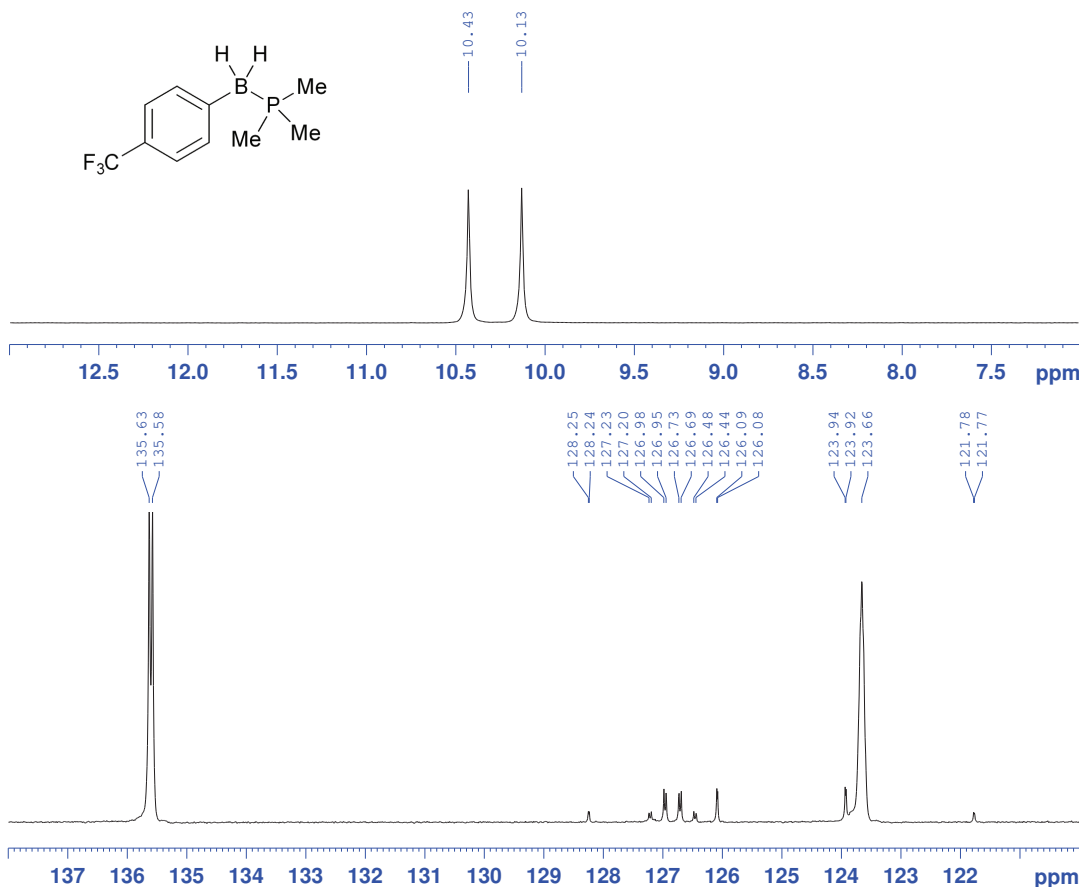

## IBB-nmr Analysis

NAME Mar07-2024  
 EXPNO 2  
 PROCNO 1  
 Date\_ 20240307  
 Time 12.21  
 INSTRUM av500  
 PROBHD 5 mm CPDCH 13C  
 PULPROG zgpg30  
 TD 65536  
 SOLVENT CDCl<sub>3</sub>  
 NS 1024  
 DS 4  
 SWH 30030.029 Hz  
 FIDRES 0.458222 Hz  
 AQ 1.0912410 sec  
 RG 90.5  
 DW 16.650 usec  
 DE 20.00 usec  
 TE 297.9 K  
 D1 2.00000000 sec  
 D11 0.03000000 sec  
 TD0 1

===== CHANNEL f1 =====  
 NUC1 13C  
 P1 10.00 usec  
 PL1 -5.00 dB  
 PL1W 14.29790783 W  
 SFO1 125.7703643 MHz

===== CHANNEL f2 =====  
 CPDPRG2 waltz16  
 NUC2 1H  
 PCPD2 80.00 usec  
 PL2 -4.00 dB  
 PL12 14.06 dB  
 PL13 17.00 dB  
 PL2W 6.30957365 W  
 PL12W 0.09862794 W  
 PL13W 0.05011872 W  
 SFO2 500.1320005 MHz  
 SI 32768  
 SF 125.7577937 MHz  
 WDW EM  
 SSB 0  
 LB 1.00 Hz  
 GB 0  
 PC 0.30

4CF3PhBH2PMe3

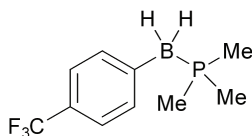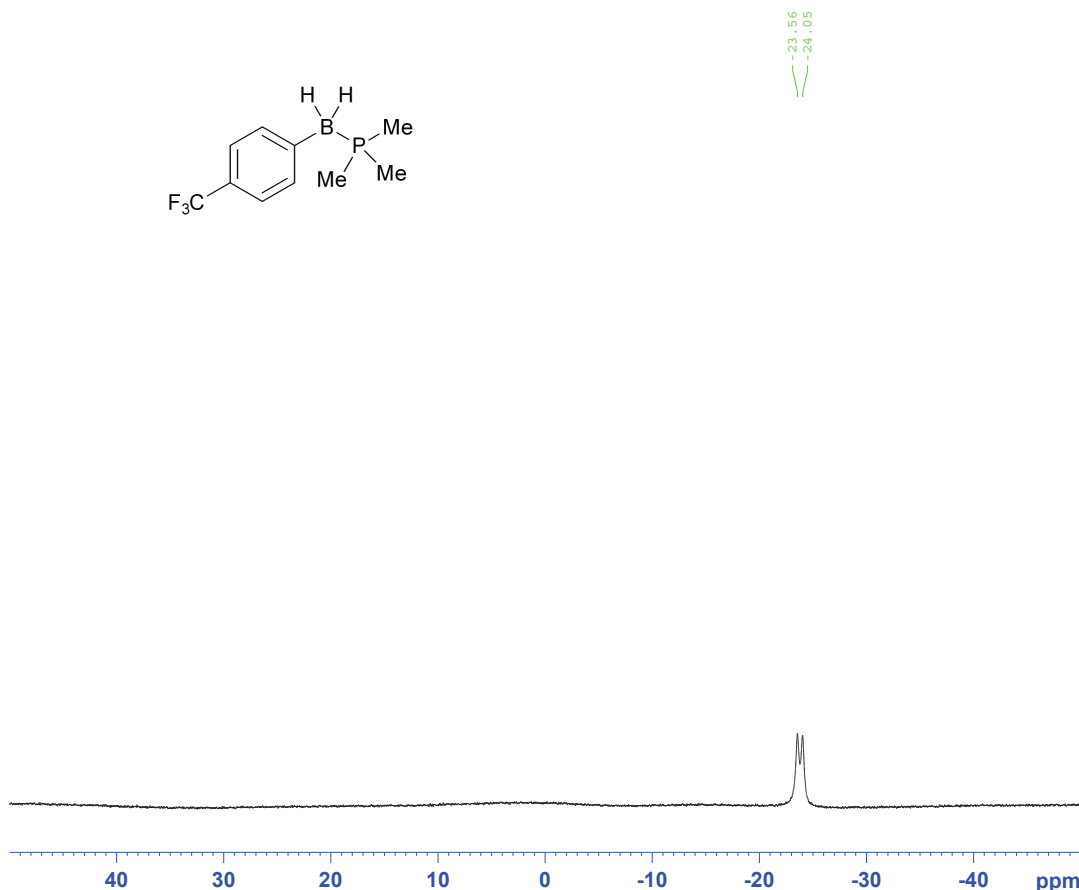

## IBB-nmr Analysis

NAME Dec4-2021  
 EXPNO 4  
 PROCNO 1  
 Date\_ 20211204  
 Time 12.23  
 INSTRUM av400  
 PROBHD 5 mm PABBO BB-  
 PULPROG zgig  
 TD 32768  
 SOLVENT DMSO  
 NS 256  
 DS 4  
 SWH 20000.000 Hz  
 FIDRES 0.610352 Hz  
 AQ 0.8192500 sec  
 RG 203  
 DW 25.000 usec  
 DE 20.00 usec  
 TE 297.3 K  
 D1 1.00000000 sec  
 D11 0.03000000 sec  
 TD0 1

===== CHANNEL f1 =====  
 NUC1 11B  
 P1 6.30 usec  
 PL1 -2.00 dB  
 SFO1 128.3776050 MHz

===== CHANNEL f2 =====  
 CPDPRG2 waltz16  
 NUC2 1H  
 PCPD2 80.00 usec  
 PL2 -1.70 dB  
 PL12 13.80 dB  
 PL2W 14.48987389 W  
 PL12W 0.40838012 W  
 SFO2 400.1316005 MHz  
 SI 32768  
 SF 128.3776183 MHz  
 WDW EM  
 SSB 0  
 LB 2.00 Hz  
 GB 0  
 PC 1.40

4CF3PhBH2PMe3

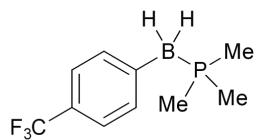

-55.90

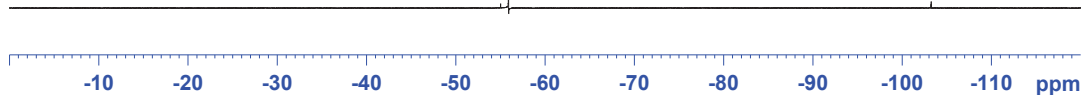

## IBB-nmr Analysis

```

NAME          Dec4-2021
EXPNO         6
PROCNO        1
Date_         20211204
Time_         12.36
INSTRUM       av400
PROBHD        5 mm PABBO BB-
PULPROG       zgfhigqn
TD            131072
SOLVENT       DMSO
NS            4
DS            8
SWH           89285.711 Hz
FIDRES        0.681196 Hz
AQ            0.7340532 sec
RG            203
DW            5.600 usec
DE            6.50 usec
TE            296.7 K
D1            1.00000000 sec
D11           0.03000000 sec
D12           0.00002000 sec
TD0           1

```

```

===== CHANNEL f1 =====
NUC1          19F
P1            19.50 usec
PL1           -4.00 dB
PL1W          16.40489006 W
SFO1          376.4607164 MHz

```

```

===== CHANNEL f2 =====
CPDPRG2       waltz16
NUC2          1H
PCPD2         112.00 usec
PL2           -4.00 dB
PL12          18.00 dB
PL2W          24.60733604 W
PL12W         0.15526180 W
SFO2          400.1316005 MHz
SI            65536
SF            376.4966788 MHz
WDW           EM
SSB           0
LB            0.30 Hz
GB            0
PC            1.00

```

4CF3PhBH2PMe3

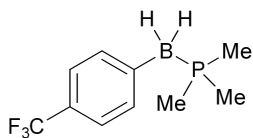

-6.17

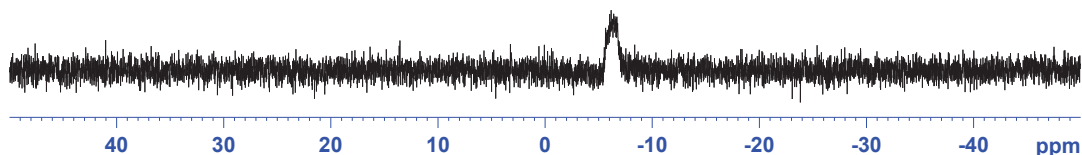

## IBB-nmr Analysis

```

NAME          Dec4-2021
EXPNO         3
PROCNO        1
Date_         20211204
Time_         12.12
INSTRUM       av400
PROBHD        5 mm PABBO BB-
PULPROG       zg30
TD            65536
SOLVENT       DMSO
NS            64
DS            4
SWH           64102.563 Hz
FIDRES        0.978127 Hz
AQ            0.5112308 sec
RG            203
DW            7.800 usec
DE            6.50 usec
TE            296.6 K
D1            2.00000000 sec
TD0           1

```

```

===== CHANNEL f1 =====
NUC1          31P
P1            10.00 usec
PL1           -0.70 dB
PL1W          30.10233498 W
SFO1          161.9674942 MHz
SI            32768
SF            161.9754962 MHz
WDW           EM
SSB           0
LB            1.00 Hz
GB            0
PC            1.40

```

4CF3PhBH2Me2Ph 7-13Fr

## B-4-(Trifluoromethyl)phenyl dimethyl(phenyl)phosphine-borane (29)

## IBB-nmr Analysis

NAME Feb6-2022  
 EXPNO 5  
 PROCNO 1  
 Date\_ 20220206  
 Time\_ 14.34  
 INSTRUM av400  
 PROBHD 5 mm PABBO BB-  
 PULPROG zg30  
 TD 65536  
 SOLVENT DMSO  
 NS 16  
 DS 2  
 SWH 8223.685 Hz  
 FIDRES 0.125483 Hz  
 AQ 3.9846387 sec  
 RG 203  
 DW 60.800 usec  
 DE 6.50 usec  
 TE 296.2 K  
 D1 1.00000000 sec  
 TD0 1

===== CHANNEL f1 =====  
 NUC1 1H  
 P1 14.00 usec  
 PL1 -1.80 dB  
 PL1W 14.82738590 W  
 SFO1 400.1324710 MHz  
 SI 32768  
 SF 400.1300033 MHz  
 WDW EM  
 SSB 0  
 LB 0.30 Hz  
 GB 0  
 PC 1.00

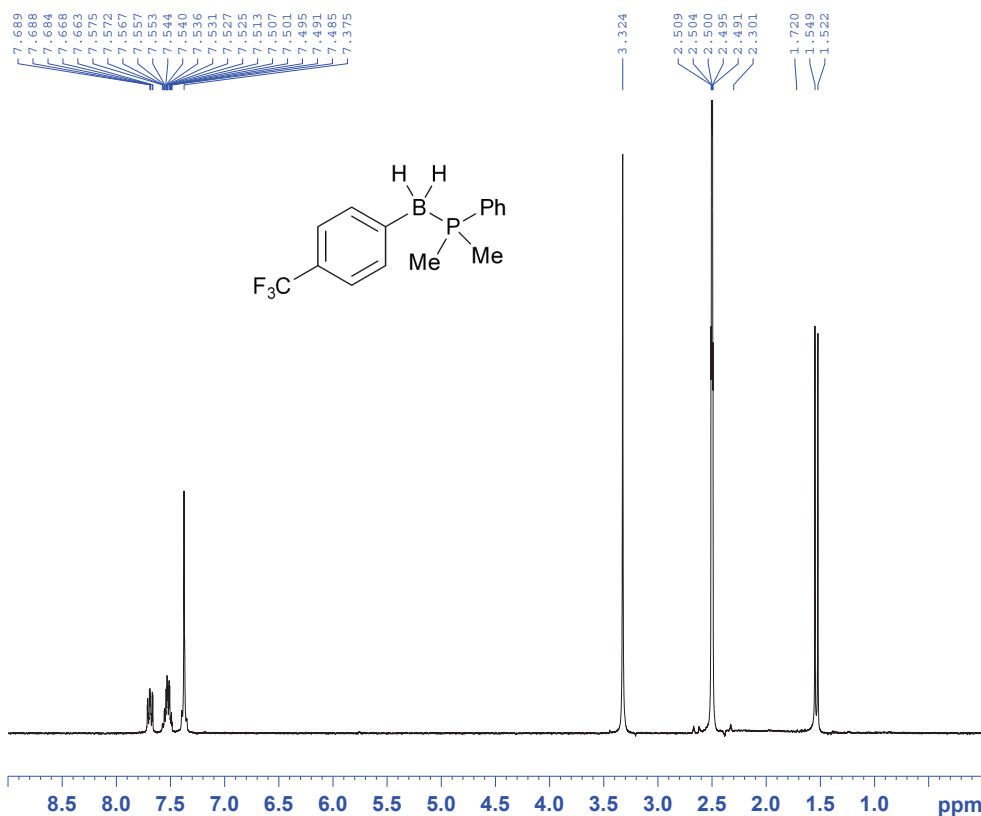

4CF3PhBH2PPhMe2

## IBB-nmr Analysis

NAME Aug16-2023  
 EXPNO 1  
 PROCNO 1  
 Date\_ 20230816  
 Time\_ 20.49  
 INSTRUM av400  
 PROBHD 5 mm PABBO BB-  
 PULPROG zgpg30  
 TD 65536  
 SOLVENT DMSO  
 NS 2048  
 DS 2  
 SWH 24038.461 Hz  
 FIDRES 0.366798 Hz  
 AQ 1.3631988 sec  
 RG 128  
 DW 20.800 usec  
 DE 6.50 usec  
 TE 298.6 K  
 D1 2.00000000 sec  
 D11 0.03000000 sec  
 TD0 1

===== CHANNEL f1 =====  
 NUC1 13C  
 P1 9.00 usec  
 PL1 -3.00 dB  
 PL1W 73.17333984 W  
 SFO1 100.6228298 MHz

===== CHANNEL f2 =====  
 CPDPRG2 waltz16  
 NUC2 1H  
 PCPD2 80.00 usec  
 PL2 -1.70 dB  
 PL12 13.80 dB  
 PL13 13.80 dB  
 PL2W 14.49887389 W  
 PL12W 0.40838012 W  
 PL13W 0.40838012 W  
 SFO2 400.1316005 MHz  
 SI 32768  
 SF 100.6127689 MHz  
 WDW EM  
 SSB 0  
 LB 1.00 Hz  
 GB 0  
 PC 0.30

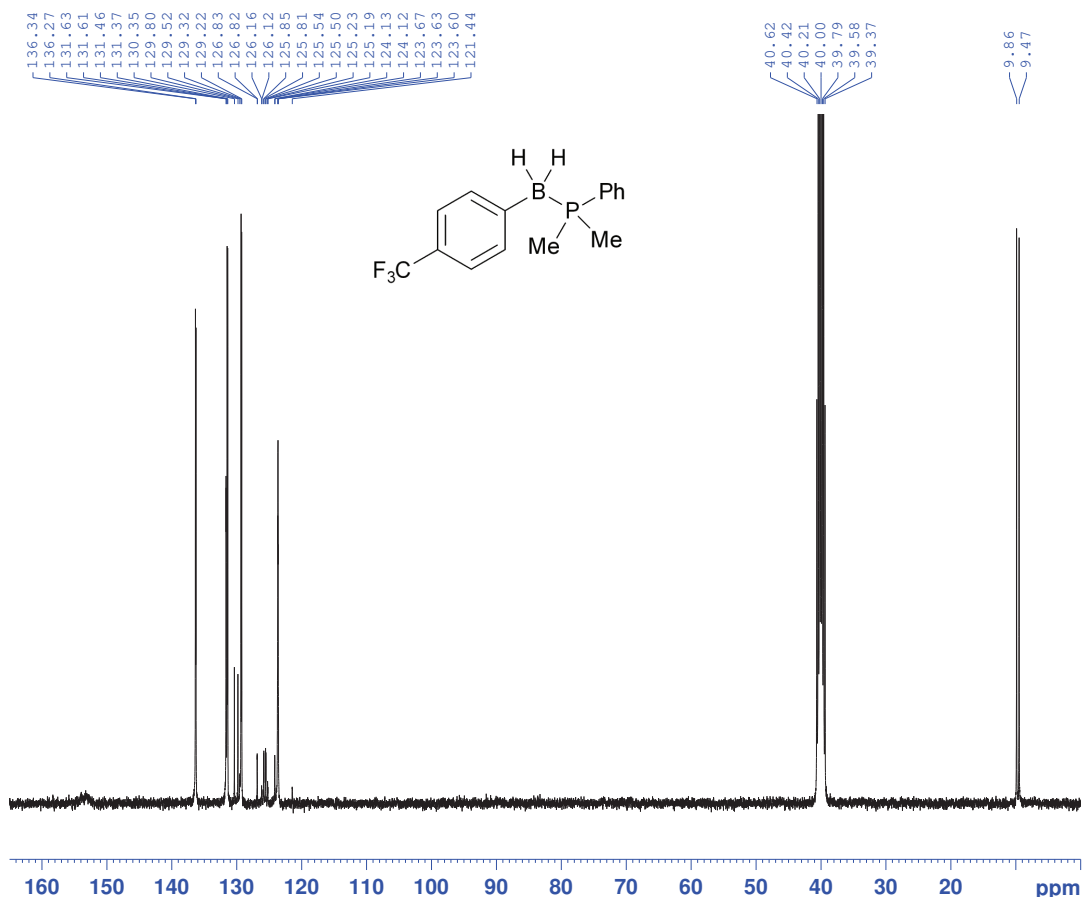

4CF3PhBH2PPhMe2

## IBB-nmr Analysis

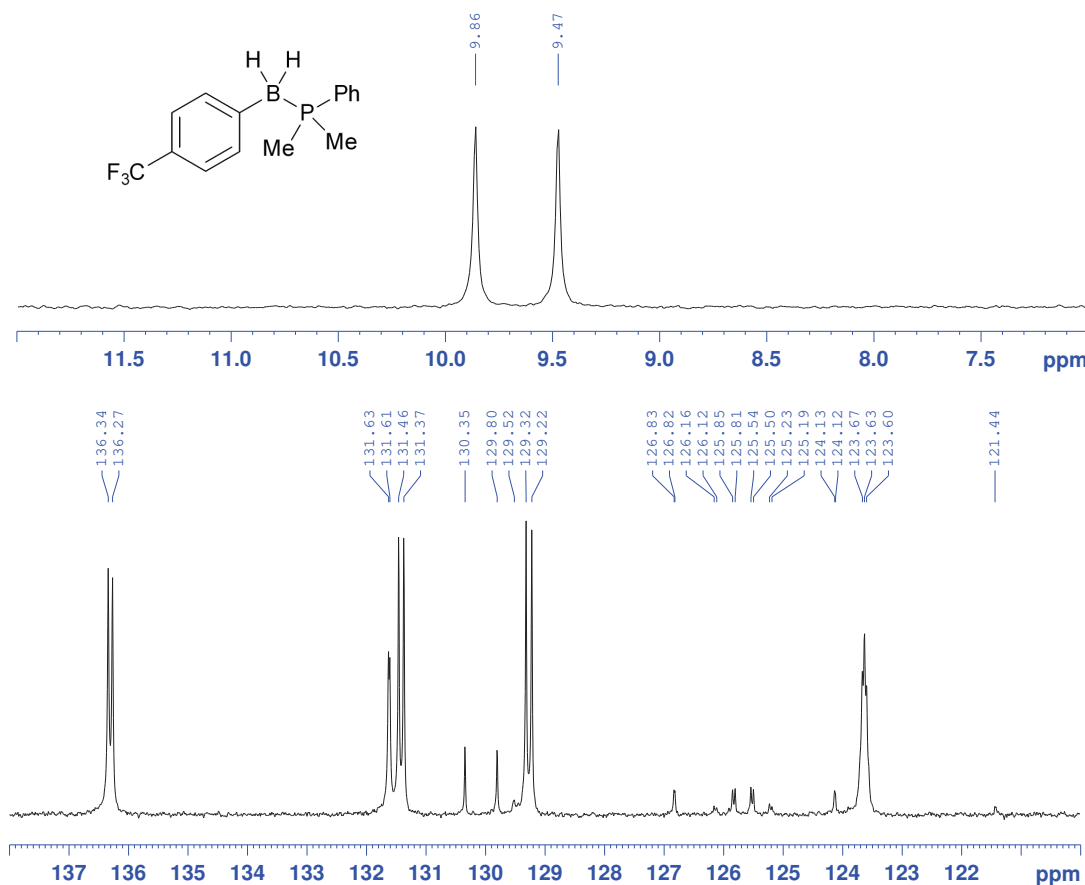

NAME Aug16-2023  
 EXPNO 1  
 PROCNO 1  
 Date\_ 20230816  
 Time 20.49  
 INSTRUM av400  
 PROBHD 5 mm PABBO BB-  
 PULPROG zgpg30  
 TD 65536  
 SOLVENT DMSO  
 NS 2048  
 DS 2  
 SWH 24038.461 Hz  
 FIDRES 0.366798 Hz  
 AQ 1.3631988 sec  
 RG 128  
 DW 20.800 usec  
 DE 6.50 usec  
 TE 298.6 K  
 D1 2.00000000 sec  
 D11 0.03000000 sec  
 TD0 1

===== CHANNEL f1 =====  
 NUC1 13C  
 P1 9.00 usec  
 PL1 -3.00 dB  
 PL1W 73.17333984 W  
 SFO1 100.6228298 MHz

===== CHANNEL f2 =====  
 CPDPRG2 waltz16  
 NUC2 1H  
 PCPD2 80.00 usec  
 PL2 -1.70 dB  
 PL12 13.80 dB  
 PL13 13.80 dB  
 PL2W 14.48987389 W  
 PL12W 0.40838012 W  
 PL13W 0.40838012 W  
 SFO2 400.1316005 MHz  
 SI 32768  
 SF 100.6127689 MHz  
 WDW EM  
 SSB 0  
 LB 1.00 Hz  
 GB 0  
 PC 0.30

4CF3PhBH2Me2Ph 7-13Fr

## IBB-nmr Analysis

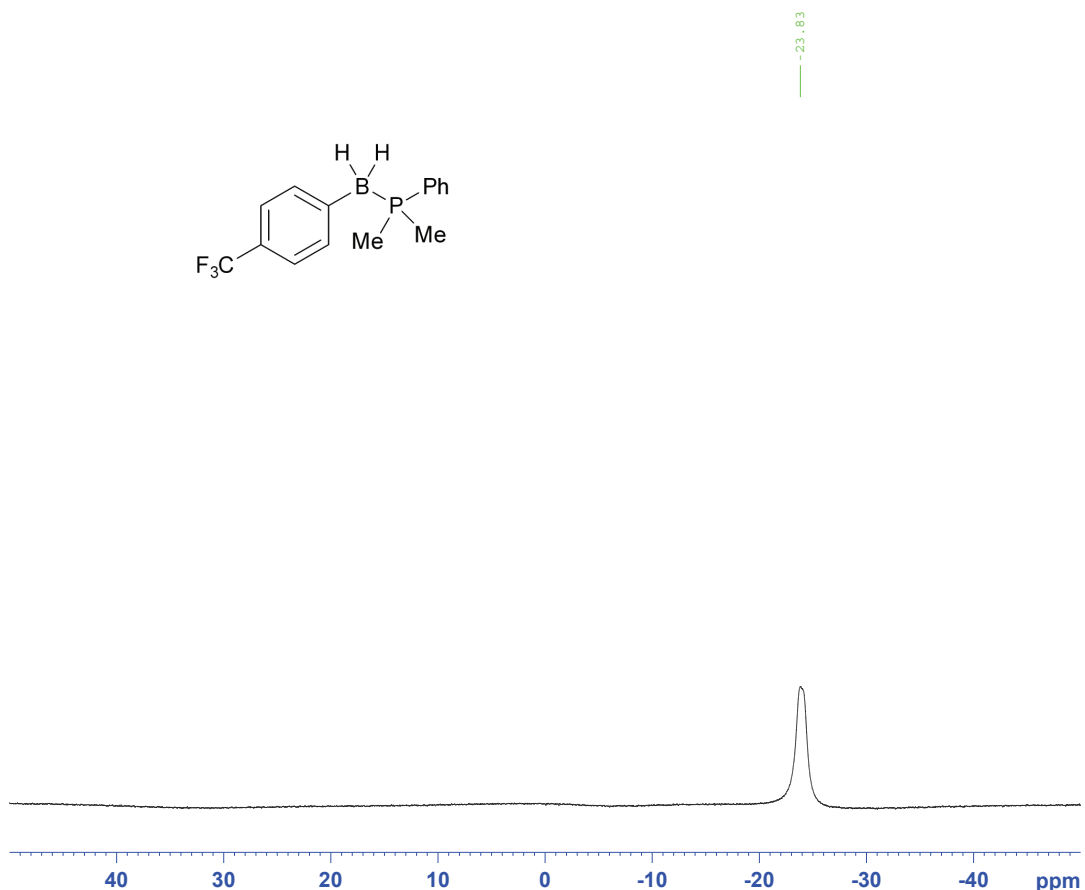

NAME Feb6-2022  
 EXPNO 14  
 PROCNO 1  
 Date\_ 20220206  
 Time 23.03  
 INSTRUM av400  
 PROBHD 5 mm PABBO BB-  
 PULPROG zgig  
 TD 32768  
 SOLVENT DMSO  
 NS 512  
 DS 4  
 SWH 20000.000 Hz  
 FIDRES 0.610352 Hz  
 AQ 0.8192500 sec  
 RG 203  
 DW 25.000 usec  
 DE 20.00 usec  
 TE 297.1 K  
 D1 1.00000000 sec  
 D11 0.03000000 sec  
 TD0 1

===== CHANNEL f1 =====  
 NUC1 11B  
 P1 6.30 usec  
 PL1 -2.00 dB  
 SFO1 128.3776050 MHz

===== CHANNEL f2 =====  
 CPDPRG2 waltz16  
 NUC2 1H  
 PCPD2 80.00 usec  
 PL2 -1.70 dB  
 PL12 13.80 dB  
 PL2W 14.48987389 W  
 PL12W 0.40838012 W  
 SFO2 400.1316005 MHz  
 SI 32768  
 SF 128.3776183 MHz  
 WDW EM  
 SSB 0  
 LB 2.00 Hz  
 GB 0  
 PC 1.40



4CF3PhBH2Me2Ph 7-13Fr

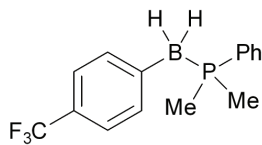

-60.67  
-60.68

## IBB-nmr Analysis

```
NAME      Feb6-2022
EXPNO     6
PROCNO    1
Date_     20220206
Time      14.40
INSTRUM   av400
PROBHD    5 mm PABBO BB-
PULPROG   zgfhigqn
TD         131072
SOLVENT   DMSO
NS         8
DS         4
SWH        89285.711 Hz
FIDRES     0.681196 Hz
AQ         0.7340532 sec
RG         203
DW         5.600 usec
DE         6.50 usec
TE         296.3 K
D1         1.00000000 sec
D11        0.03000000 sec
D12        0.00002000 sec
TD0        1
```

```
===== CHANNEL f1 =====
NUC1       19F
P1         19.50 usec
PL1        -4.00 dB
PL1W       16.40489006 W
SFO1       376.4607164 MHz
```

```
===== CHANNEL f2 =====
CPDPRG2    waltz16
NUC2        1H
PCPD2      112.00 usec
PL2         -4.00 dB
PL12        18.00 dB
PL2W       24.60733604 W
PL12W      0.15526180 W
SFO2       400.1316005 MHz
SI          65536
SF         376.4984617 MHz
WDW         EM
SSB         0
LB          0.30 Hz
GB          0
PC          1.00
```

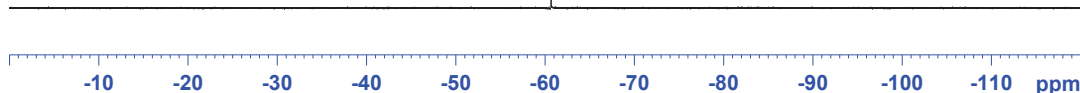

4CF3PhBH2Me2Ph 7-13Fr

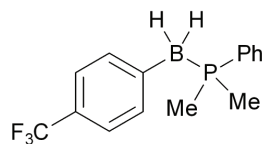

-1.39

## IBB-nmr Analysis

```
NAME      Feb6-2022
EXPNO     9
PROCNO    1
Date_     20220206
Time      15.10
INSTRUM   av400
PROBHD    5 mm PABBO BB-
PULPROG   zg30
TD         65536
SOLVENT   DMSO
NS         256
DS         4
SWH        64102.563 Hz
FIDRES     0.978127 Hz
AQ         0.5112308 sec
RG         203
DW         7.800 usec
DE         6.50 usec
TE         296.1 K
D1         2.00000000 sec
D11        0.03000000 sec
D12        0.00002000 sec
TD0        1
```

```
===== CHANNEL f1 =====
NUC1       31P
P1         10.00 usec
PL1        -0.70 dB
PL1W       30.10233498 W
SFO1       161.9674942 MHz
SI         32768
SF         161.9754962 MHz
WDW         EM
SSB         0
LB          1.00 Hz
GB          0
PC          1.40
```

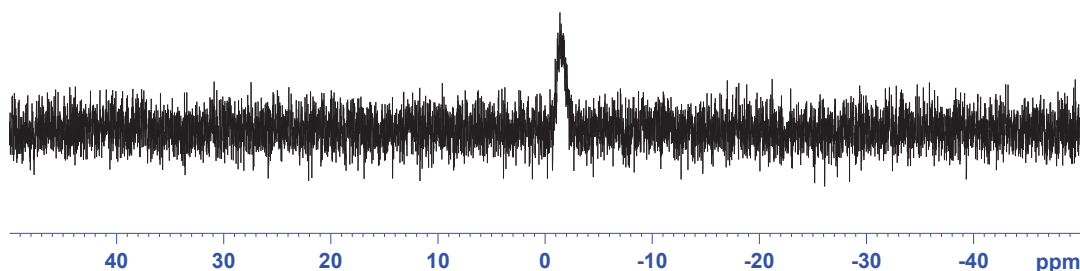

4CF3PhBH2PEt3 4-9Fr

## B-4-(Trifluoromethyl)phenyl triethylphosphine-borane (30)

## IBB-nmr Analysis

NAME Feb2-2022  
 EXPNO 1  
 PROCNO 1  
 Date\_ 20220202  
 Time\_ 22.04  
 INSTRUM av400  
 PROBHD 5 mm PABBO BB-  
 PULPROG zg30  
 TD 65536  
 SOLVENT DMSO  
 NS 16  
 DS 2  
 SWH 8223.685 Hz  
 FIDRES 0.125483 Hz  
 AQ 3.9846387 sec  
 RG 203  
 DW 60.800 usec  
 DE 6.50 usec  
 TE 296.3 K  
 D1 1.00000000 sec  
 TD0 1

===== CHANNEL f1 =====  
 NUC1 1H  
 P1 14.00 usec  
 PL1 -1.80 dB  
 PL1W 14.82738590 W  
 SFO1 400.1324710 MHz  
 SI 32768  
 SF 400.1300026 MHz  
 WDW EM  
 SSB 0  
 LB 0.30 Hz  
 GB 0  
 PC 1.00

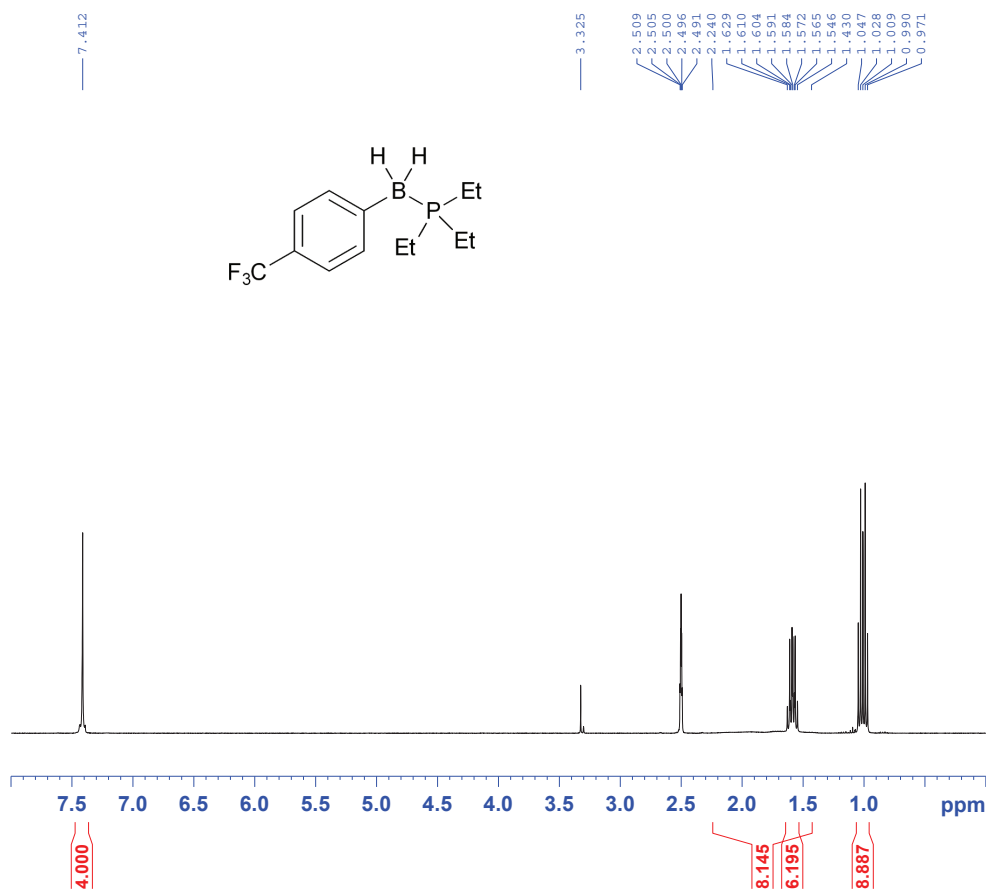

4CF3PhBH2PEt3

## IBB-nmr Analysis

NAME Mar07-2024  
 EXPNO 7  
 PROCNO 1  
 Date\_ 20240308  
 Time\_ 0.11  
 INSTRUM av500  
 PROBHD 5 mm CPDCH 13C  
 PULPROG zgpg30  
 TD 65536  
 SOLVENT CDCl3  
 NS 64  
 DS 4  
 SWH 30030.029 Hz  
 FIDRES 0.458222 Hz  
 AQ 1.0912410 sec  
 RG 40.3  
 DW 16.650 usec  
 DE 20.00 usec  
 TE 298.1 K  
 D1 2.00000000 sec  
 D11 0.03000000 sec  
 TD0 1

===== CHANNEL f1 =====  
 NUC1 13C  
 P1 10.00 usec  
 PL1 -5.00 dB  
 PL1W 14.29790783 W  
 SFO1 125.7703643 MHz

===== CHANNEL f2 =====  
 CPDPRG2 waltz16  
 NUC2 1H  
 PCPD2 80.00 usec  
 PL2 -4.00 dB  
 PL12 14.06 dB  
 PL13 17.00 dB  
 PL2W 6.30857365 W  
 PL12W 0.09862794 W  
 PL13W 0.05011872 W  
 SFO2 500.1320005 MHz  
 SI 32768  
 SF 125.7577965 MHz  
 WDW EM  
 SSB 0  
 LB 1.00 Hz  
 GB 0  
 PC 0.30

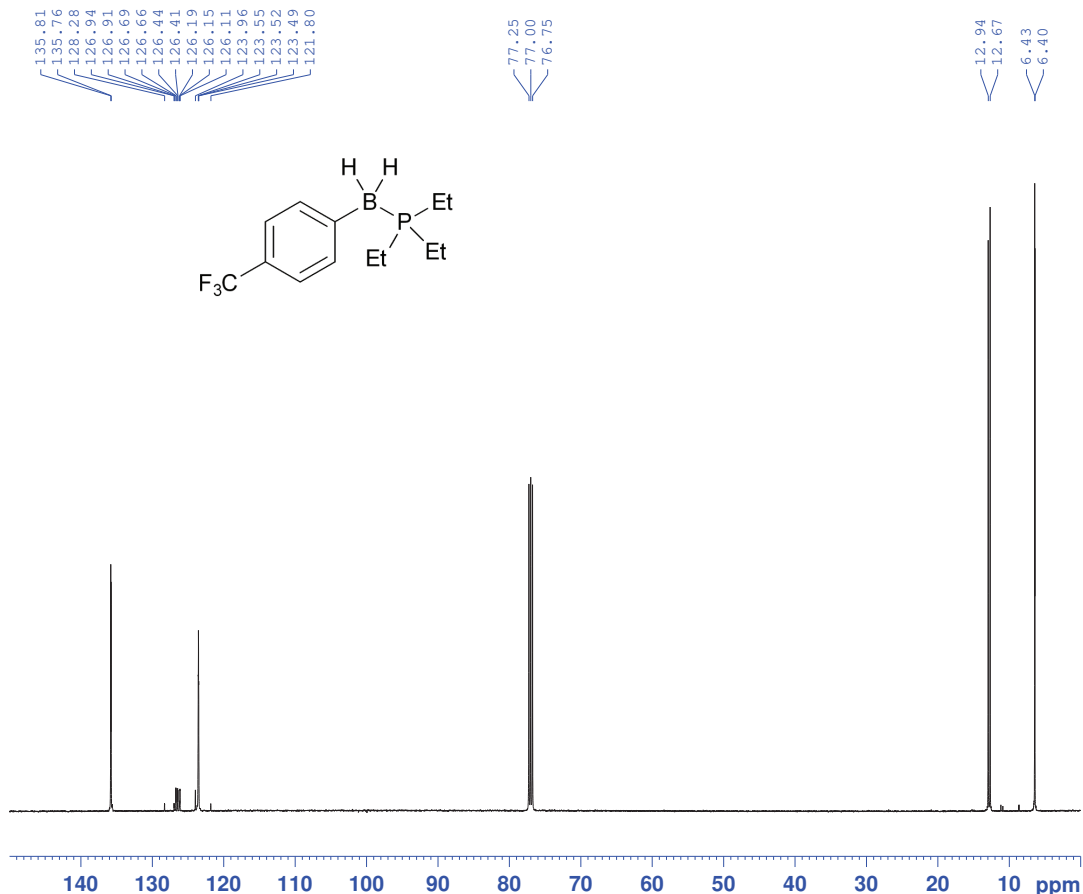

4CF3PhBH2PEt3

## IBB-nmr Analysis

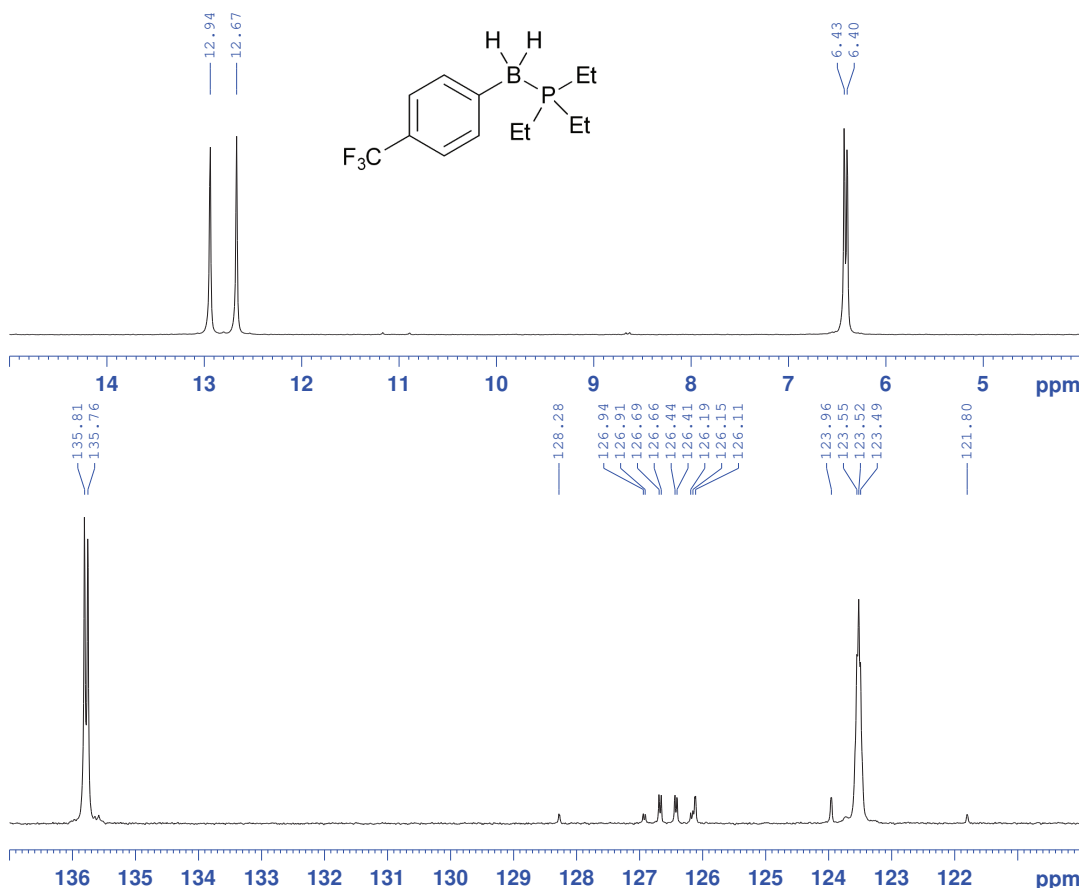

NAME Mar07-2024  
 EXPNO 7  
 PROCNO 1  
 Date\_ 20240308  
 Time 0.11  
 INSTRUM av500  
 PROBHD 5 mm CPDCH 13C  
 PULPROG zgpg30  
 TD 65536  
 SOLVENT CDCl3  
 NS 64  
 DS 4  
 SWH 30030.029 Hz  
 FIDRES 0.458222 Hz  
 AQ 1.0912410 sec  
 RG 40.3  
 DW 16.650 usec  
 DE 20.00 usec  
 TE 298.1 K  
 D1 2.00000000 sec  
 D11 0.03000000 sec  
 TD0 1

===== CHANNEL f1 =====  
 NUC1 13C  
 P1 10.00 usec  
 PL1 -5.00 dB  
 PL1W 14.29790783 W  
 SFO1 125.7703643 MHz

===== CHANNEL f2 =====  
 CPDPRG2 waltz16  
 NUC2 1H  
 PCPD2 80.00 usec  
 PL2 -4.00 dB  
 PL12 14.06 dB  
 PL13 17.00 dB  
 PL2W 6.30957365 W  
 PL12W 0.09862794 W  
 PL13W 0.05011872 W  
 SFO2 500.1320005 MHz  
 SI 32768  
 SF 125.7577965 MHz  
 WDW EM  
 SSB 0  
 LB 1.00 Hz  
 GB 0  
 PC 0.30

4CF3PhBH2PEt3 4-9Fr

## IBB-nmr Analysis

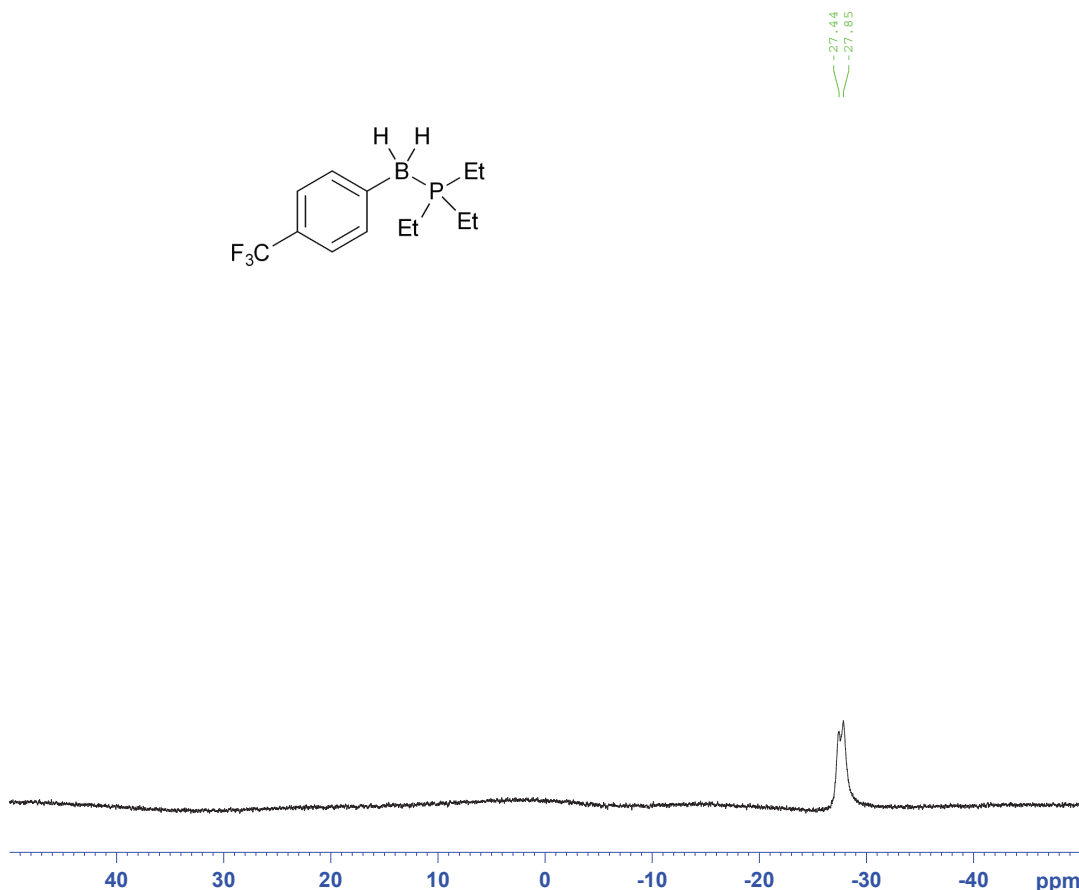

NAME Feb1-2022  
 EXPNO 4  
 PROCNO 1  
 Date\_ 20220202  
 Time 0.13  
 INSTRUM av400  
 PROBHD 5 mm PABBO BB-  
 PULPROG zgig  
 TD 32768  
 SOLVENT DMSO  
 NS 256  
 DS 4  
 SWH 20000.000 Hz  
 FIDRES 0.610352 Hz  
 AQ 0.8192500 sec  
 RG 203  
 DW 25.000 usec  
 DE 20.00 usec  
 TE 297.0 K  
 D1 1.00000000 sec  
 D11 0.03000000 sec  
 TD0 1

===== CHANNEL f1 =====  
 NUC1 11B  
 P1 6.30 usec  
 PL1 -2.00 dB  
 SFO1 128.3776050 MHz

===== CHANNEL f2 =====  
 CPDPRG2 waltz16  
 NUC2 1H  
 PCPD2 80.00 usec  
 PL2 -1.70 dB  
 PL12 13.80 dB  
 PL2W 14.48987389 W  
 PL12W 0.40838012 W  
 SFO2 400.1316005 MHz  
 SI 32768  
 SF 128.3776183 MHz  
 WDW EM  
 SSB 0  
 LB 2.00 Hz  
 GB 0  
 PC 1.40

4CF3PhBH2PEt3 4-9Fr

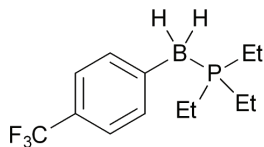

-60.65  
-60.66

## IBB-nmr Analysis

```

NAME      Feb2-2022
EXPNO     4
PROCNO    1
Date_     20220202
Time      22.19
INSTRUM   av400
PROBHD    5 mm PABBO BB-
PULPROG   zgfhigqn
TD         131072
SOLVENT   DMSO
NS         8
DS         4
SWH        89285.711 Hz
FIDRES     0.681196 Hz
AQ         0.7340532 sec
RG         203
DW         5.600 usec
DE         6.50 usec
TE         296.4 K
D1         1.00000000 sec
D11        0.03000000 sec
D12        0.00002000 sec
TD0        1
  
```

```

===== CHANNEL f1 =====
NUC1       19F
P1         19.50 usec
PL1        -4.00 dB
PL1W       16.40489006 W
SFO1       376.4607164 MHz
  
```

```

===== CHANNEL f2 =====
CPDPRG2    waltz16
NUC2        1H
PCPD2       112.00 usec
PL2         -4.00 dB
PL12        18.00 dB
PL2W        24.60733604 W
PL12W       0.15526180 W
SFO2        400.1316005 MHz
SI          65536
SF          376.4984677 MHz
WDW         EM
SSB         0
LB          0.30 Hz
GB          0
PC          1.00
  
```

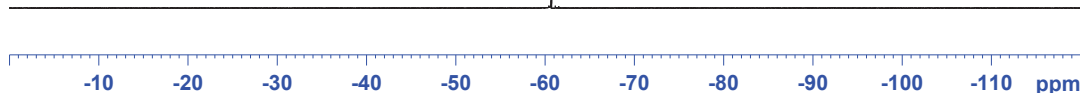

4CF3PhBH2PEt3 4-9Fr

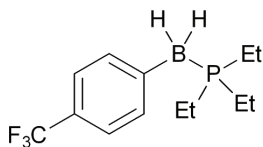

12.75

## IBB-nmr Analysis

```

NAME      Feb1-2022
EXPNO     3
PROCNO    1
Date_     20220202
Time      0.02
INSTRUM   av400
PROBHD    5 mm PABBO BB-
PULPROG   zg30
TD         65536
SOLVENT   DMSO
NS         64
DS         4
SWH        64102.563 Hz
FIDRES     0.978127 Hz
AQ         0.5112308 sec
RG         203
DW         7.800 usec
DE         6.50 usec
TE         296.3 K
D1         2.00000000 sec
D10        1
  
```

```

===== CHANNEL f1 =====
NUC1       31P
P1         10.00 usec
PL1        -0.70 dB
PL1W       30.10233498 W
SFO1       161.9674942 MHz
SI         32768
SF         161.9754962 MHz
WDW         EM
SSB         0
LB          1.00 Hz
GB          0
PC          1.40
  
```

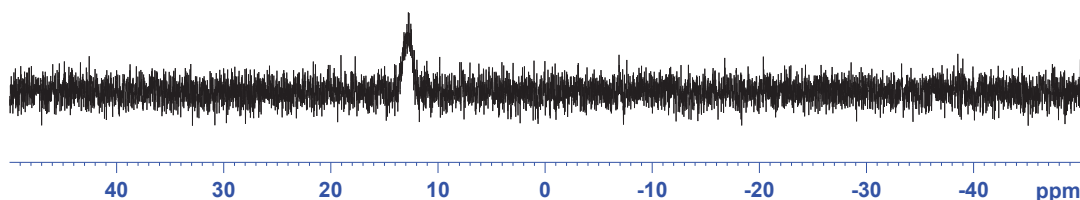

4CF3PhBH2Et2Ph 11-21Fr

## B-4-(Trifluoromethyl)phenyl diethyl(phenyl)phosphine-borane (31)

## IBB-nmr Analysis

NAME Feb11-2022  
 EXPNO 1  
 PROCNO 1  
 Date\_ 20220211  
 Time\_ 18.22  
 INSTRUM av400  
 PROBHD 5 mm PABBO BB-  
 PULPROG zg30  
 TD 65536  
 SOLVENT DMSO  
 NS 16  
 DS 2  
 SWH 8223.685 Hz  
 FIDRES 0.125483 Hz  
 AQ 3.9846387 sec  
 RG 203  
 DW 60.800 usec  
 DE 6.50 usec  
 TE 296.2 K  
 D1 1.00000000 sec  
 TD0 1

===== CHANNEL f1 =====  
 NUC1 1H  
 P1 14.00 usec  
 PL1 -1.80 dB  
 PL1W 14.82738590 W  
 SFO1 400.1324710 MHz  
 SI 32768  
 SF 400.1300036 MHz  
 WDW EM  
 SSB 0  
 LB 0.30 Hz  
 GB 0  
 PC 1.00

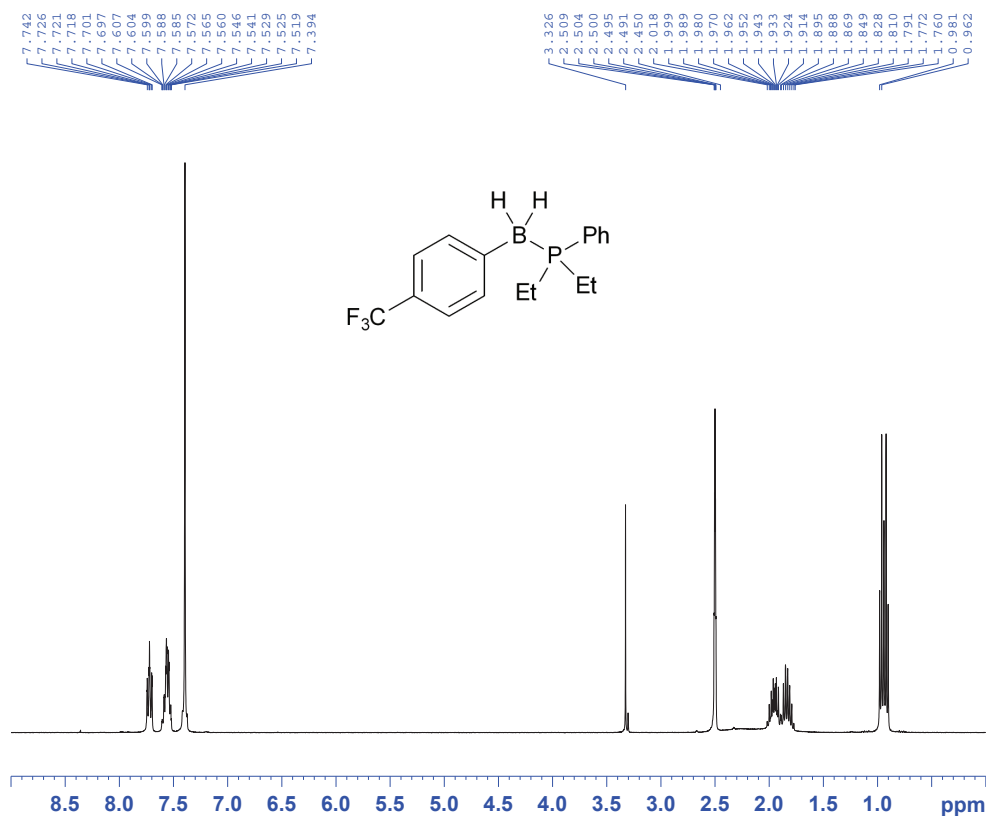

4CF3PhBH2PEt2Ph

## IBB-nmr Analysis

NAME Mar07-2024  
 EXPNO 3  
 PROCNO 1  
 Date\_ 20240307  
 Time\_ 13.36  
 INSTRUM av500  
 PROBHD 5 mm CPDCH 13C  
 PULPROG zgpg30  
 TD 65536  
 SOLVENT CDCl3  
 NS 512  
 DS 4  
 SWH 30030.029 Hz  
 FIDRES 0.458222 Hz  
 AQ 1.0912410 sec  
 RG 40.3  
 DW 16.650 usec  
 DE 20.00 usec  
 TE 298.1 K  
 D1 2.00000000 sec  
 D11 0.03000000 sec  
 TD0 1

===== CHANNEL f1 =====  
 NUC1 13C  
 P1 10.00 usec  
 PL1 -5.00 dB  
 PL1W 14.29790783 W  
 SFO1 125.7703643 MHz

===== CHANNEL f2 =====  
 CPDPRG2 waltz16  
 NUC2 1H  
 PCPD2 80.00 usec  
 PL2 -4.00 dB  
 PL12 14.06 dB  
 PL13 17.00 dB  
 PL2W 6.30857365 W  
 PL12W 0.09862794 W  
 PL13W 0.05011872 W  
 SFO2 500.1320005 MHz  
 SI 32768  
 SF 125.7577928 MHz  
 WDW EM  
 SSB 0  
 LB 1.00 Hz  
 GB 0  
 PC 0.30

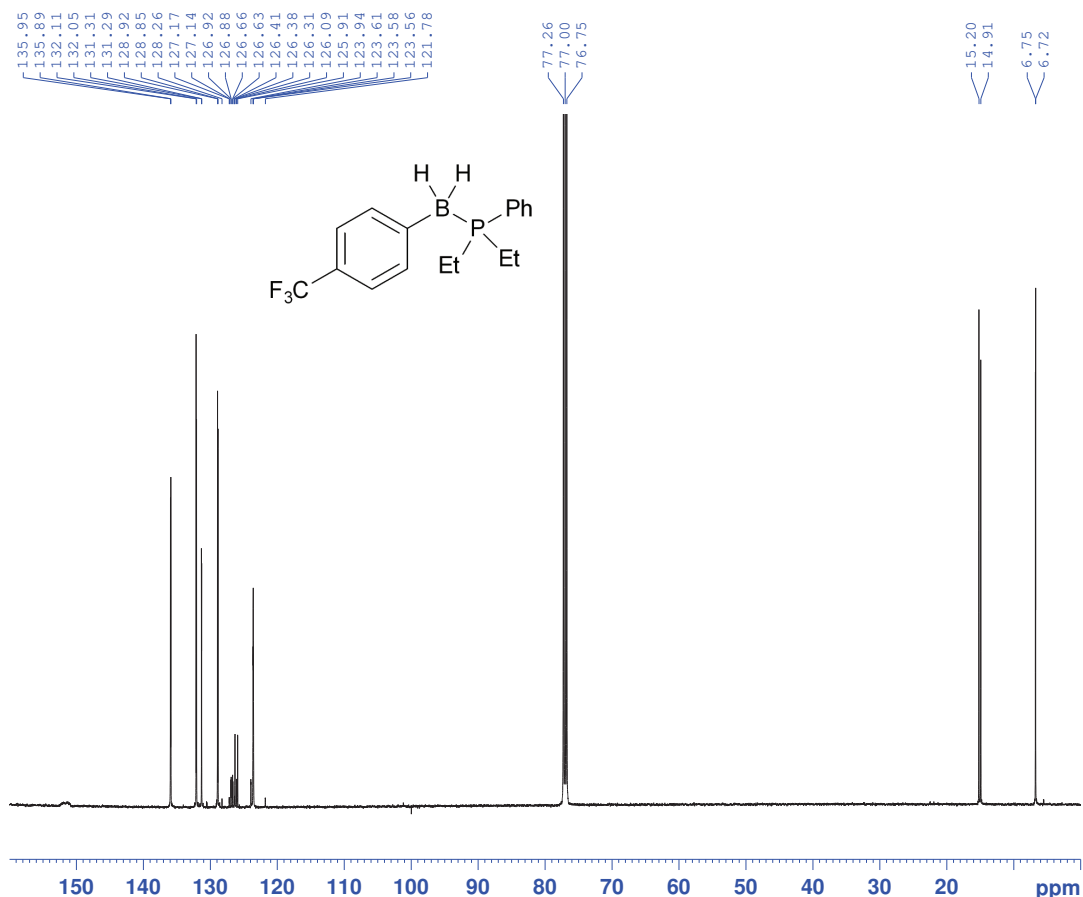

4CF3PhBH2PEt2Ph

## IBB-nmr Analysis

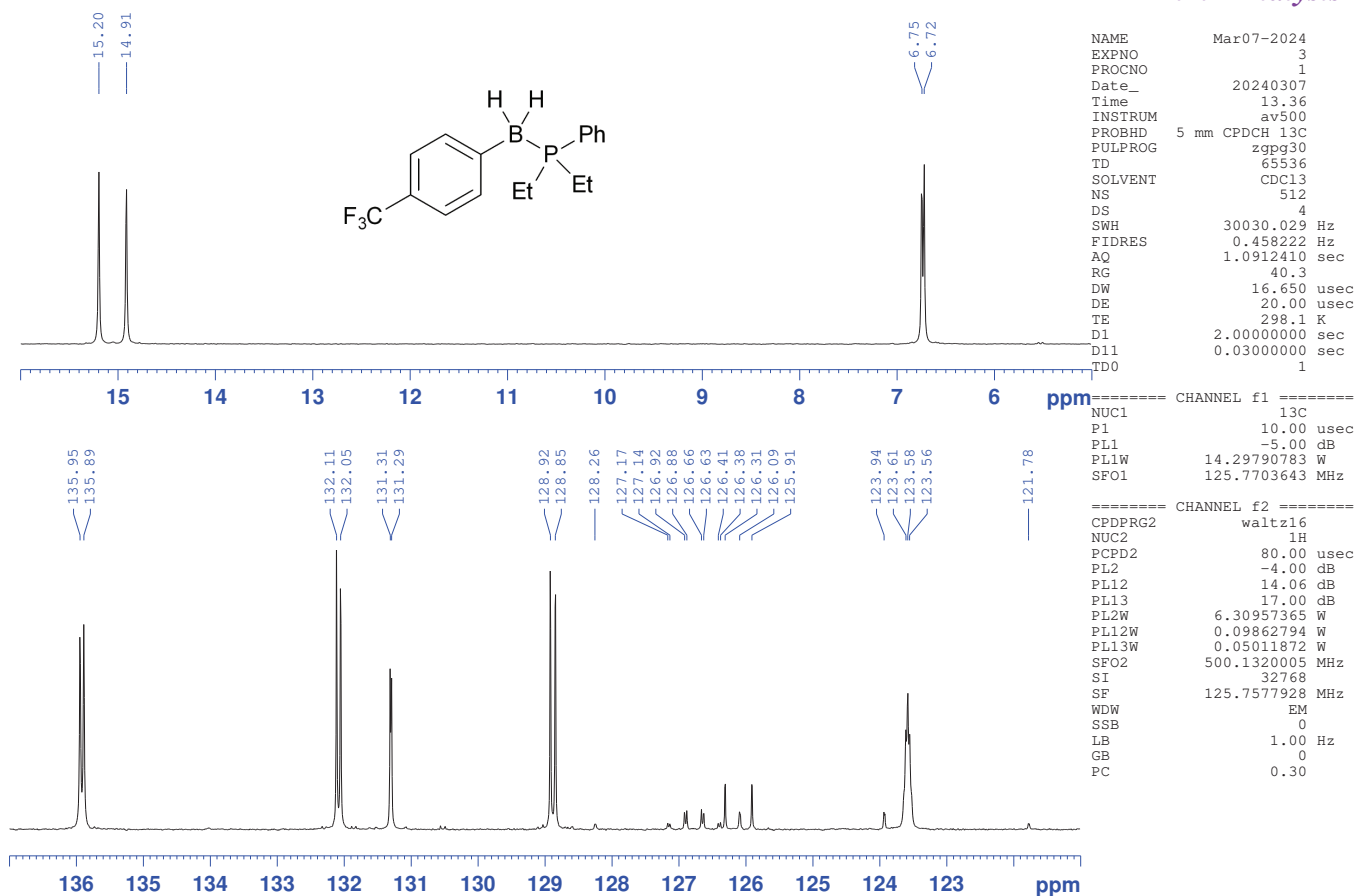

4CF3PhBH2Et2Ph 11-21Fr

## IBB-nmr Analysis

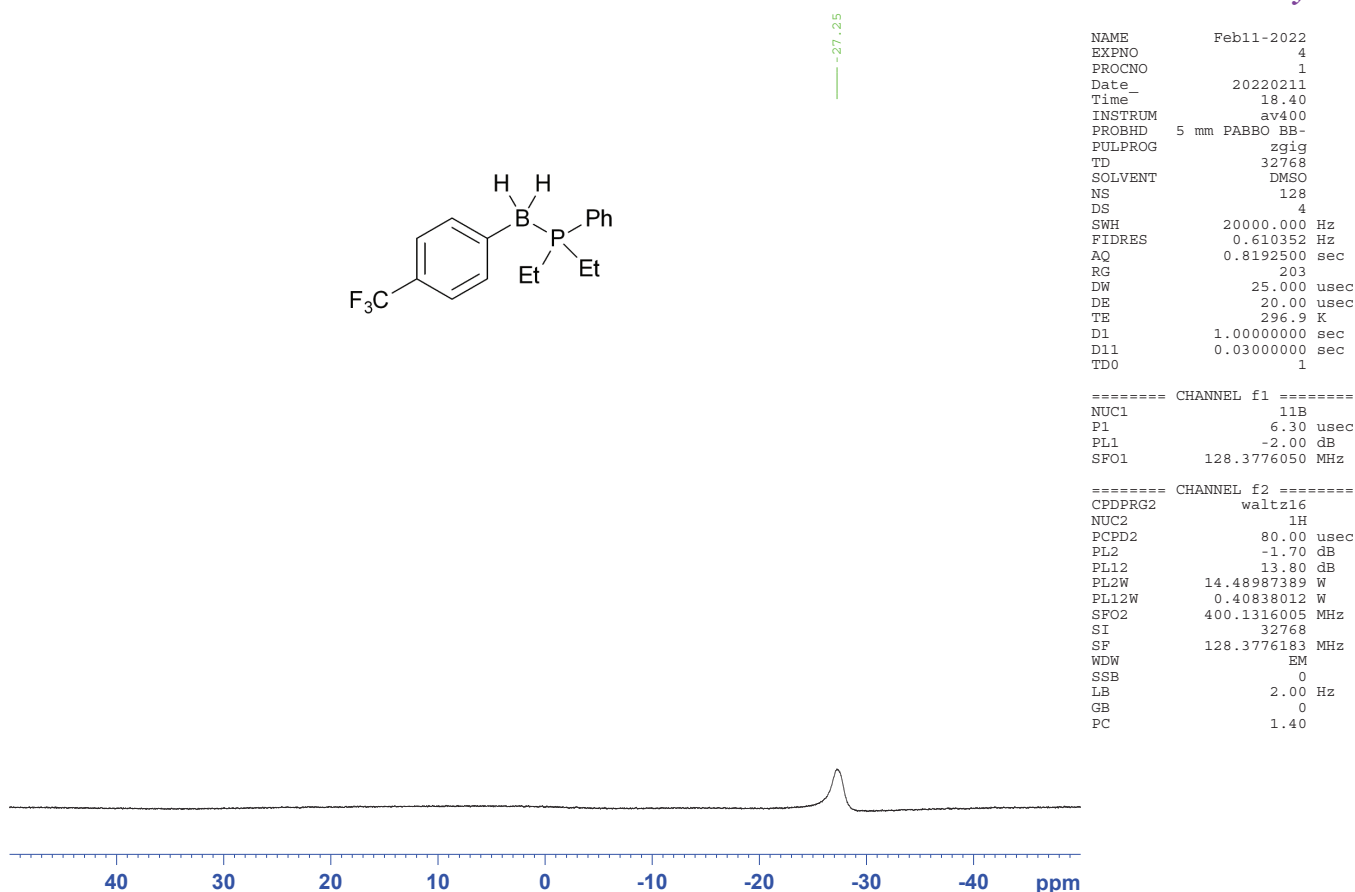

4CF3PhBH2Et2Ph 11-21Fr

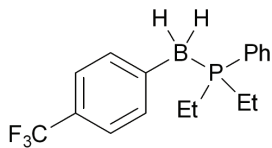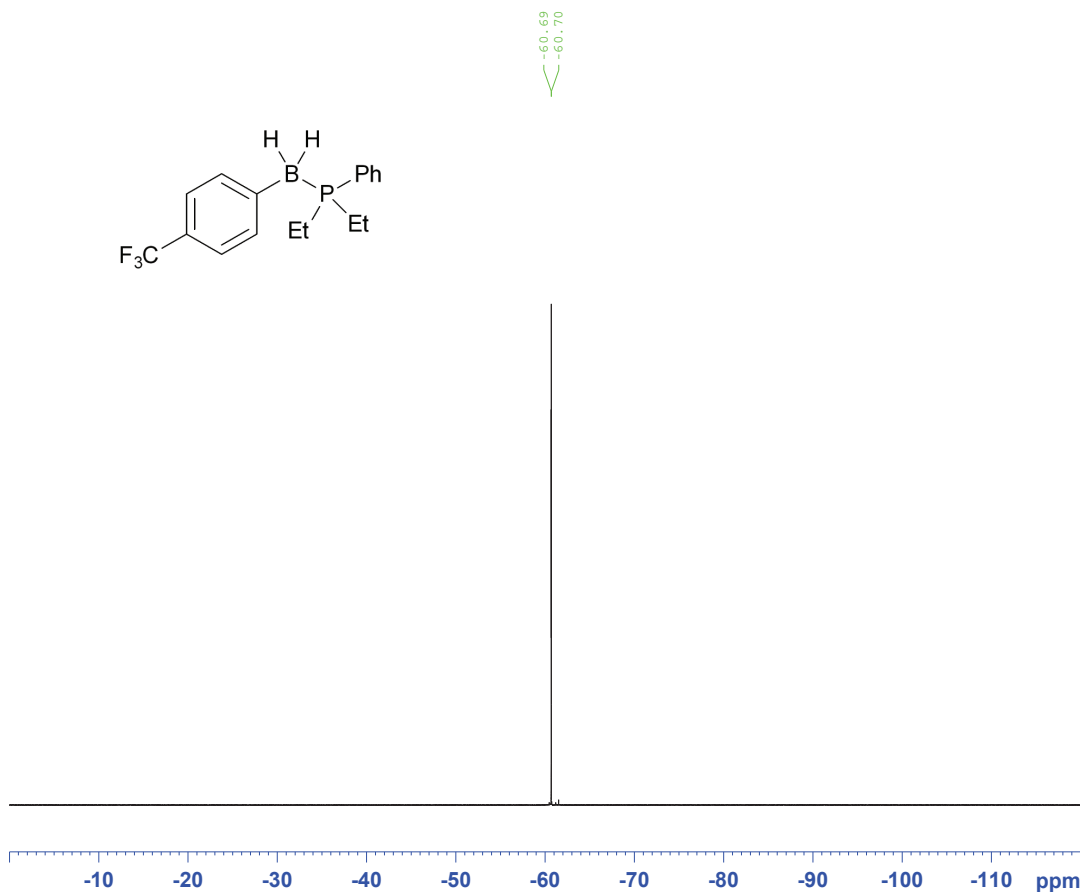

## IBB-nmr Analysis

```

NAME      Feb11-2022
EXPNO     3
PROCNO    1
Date_     20220211
Time      18.32
INSTRUM   av400
PROBHD    5 mm PABBO BB-
PULPROG   zgfhigqn
TD         131072
SOLVENT   DMSO
NS         8
DS         4
SWH        89285.711 Hz
FIDRES     0.681196 Hz
AQ         0.7340532 sec
RG         203
DW         5.600 usec
DE         6.50 usec
TE         296.2 K
D1         1.00000000 sec
D11        0.03000000 sec
D12        0.00002000 sec
TD0        1
  
```

```

===== CHANNEL f1 =====
NUC1      19F
P1        19.50 usec
PL1       -4.00 dB
PL1W      16.40489006 W
SFO1      376.4607164 MHz
  
```

```

===== CHANNEL f2 =====
CPDPRG2   waltz16
NUC2       1H
PCPD2     112.00 usec
PL2       -4.00 dB
PL12      18.00 dB
PL2W      24.60733604 W
PL12W     0.15526180 W
SFO2      400.1316005 MHz
SI         65536
SF        376.4984617 MHz
WDW        EM
SSB        0
LB         0.30 Hz
GB         0
PC         1.00
  
```

4CF3PhBH2Et2Ph 11-21Fr

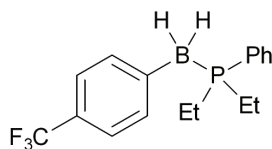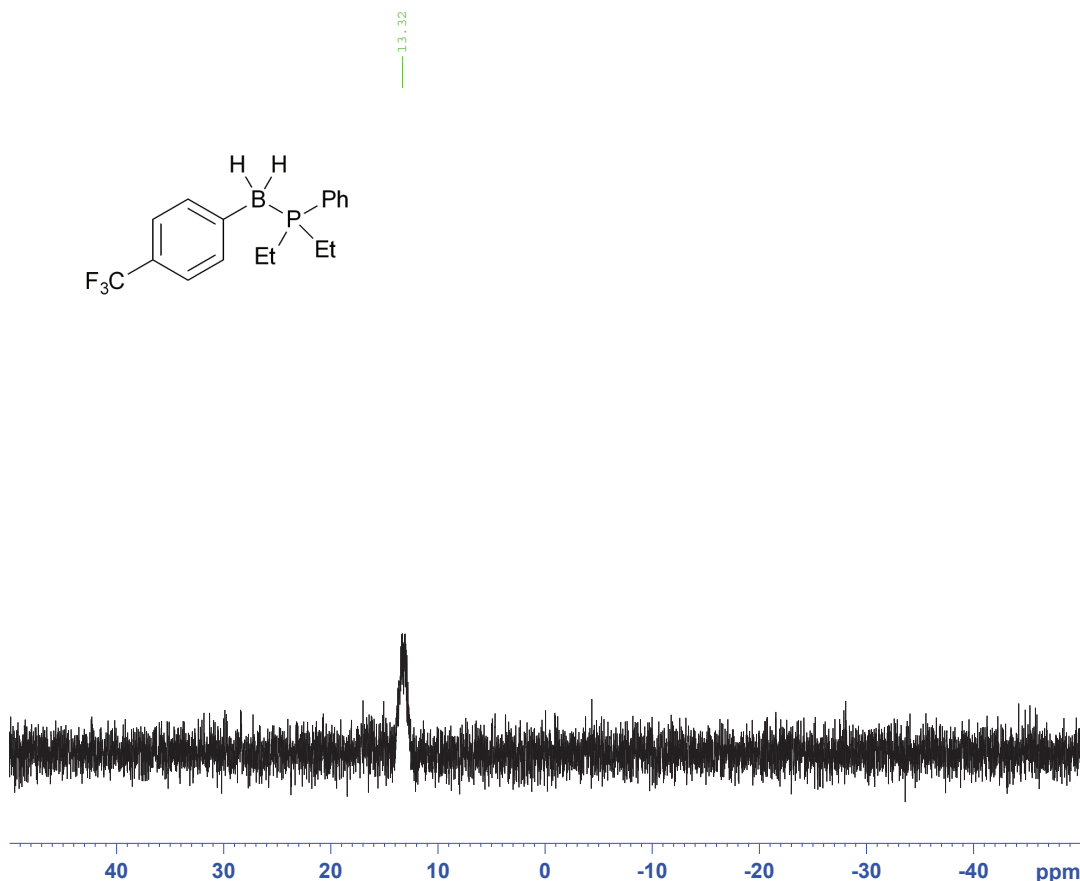

## IBB-nmr Analysis

```

NAME      Feb11-2022
EXPNO     2
PROCNO    1
Date_     20220211
Time      18.28
INSTRUM   av400
PROBHD    5 mm PABBO BB-
PULPROG   zg30
TD         65536
SOLVENT   DMSO
NS         8
DS         4
SWH        64102.563 Hz
FIDRES     0.978127 Hz
AQ         0.5112308 sec
RG         203
DW         7.800 usec
DE         6.50 usec
TE         296.4 K
D1         2.00000000 sec
D11        0.03000000 sec
D12        0.00002000 sec
TD0        1
  
```

```

===== CHANNEL f1 =====
NUC1      31P
P1        10.00 usec
PL1       -0.70 dB
PL1W      30.10233498 W
SFO1      161.9674942 MHz
SI         32768
SF        161.9754962 MHz
WDW        EM
SSB        0
LB         1.00 Hz
GB         0
PC         1.40
  
```

4CF3PhBH2P(i-Pr)3

# B-4-(Trifluoromethyl)phenyl trisopropylphosphine-borane (32)

## IBB-nmr Analysis

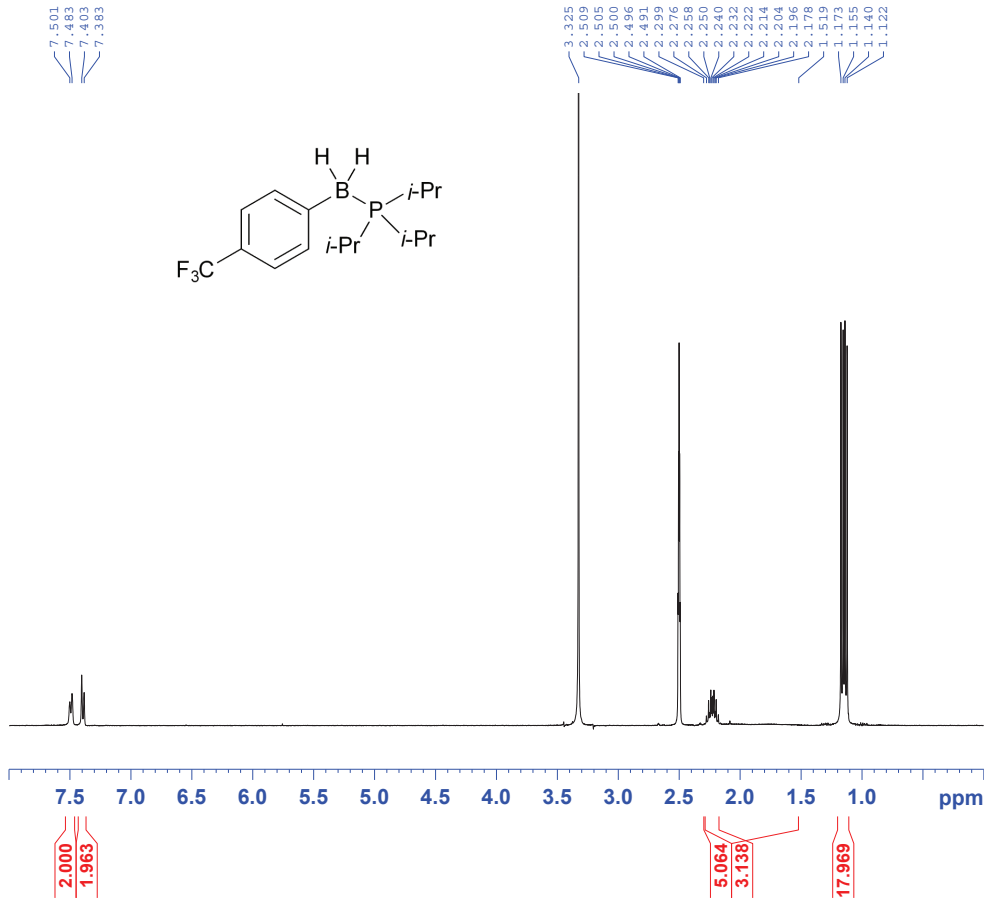

NAME May28-2022  
 EXPNO 10  
 PROCNO 1  
 Date\_ 20220528  
 Time 22.52  
 INSTRUM av400  
 PROBHD 5 mm PABBO BB-  
 PULPROG zg30  
 TD 65536  
 SOLVENT DMSO  
 NS 16  
 DS 2  
 SWH 8223.685 Hz  
 FIDRES 0.125483 Hz  
 AQ 3.9846387 sec  
 RG 203  
 DW 60.800 usec  
 DE 6.50 usec  
 TE 297.2 K  
 D1 1.00000000 sec  
 TD0 1

===== CHANNEL f1 =====  
 NUC1 1H  
 P1 14.00 usec  
 PL1 -1.80 dB  
 PL1W 14.82738590 W  
 SFO1 400.1324710 MHz  
 SI 32768  
 SF 400.1300034 MHz  
 WDW EM  
 SSB 0  
 LB 0.30 Hz  
 GB 0  
 PC 1.00

4CF3PhBH2P(i-Pr)3

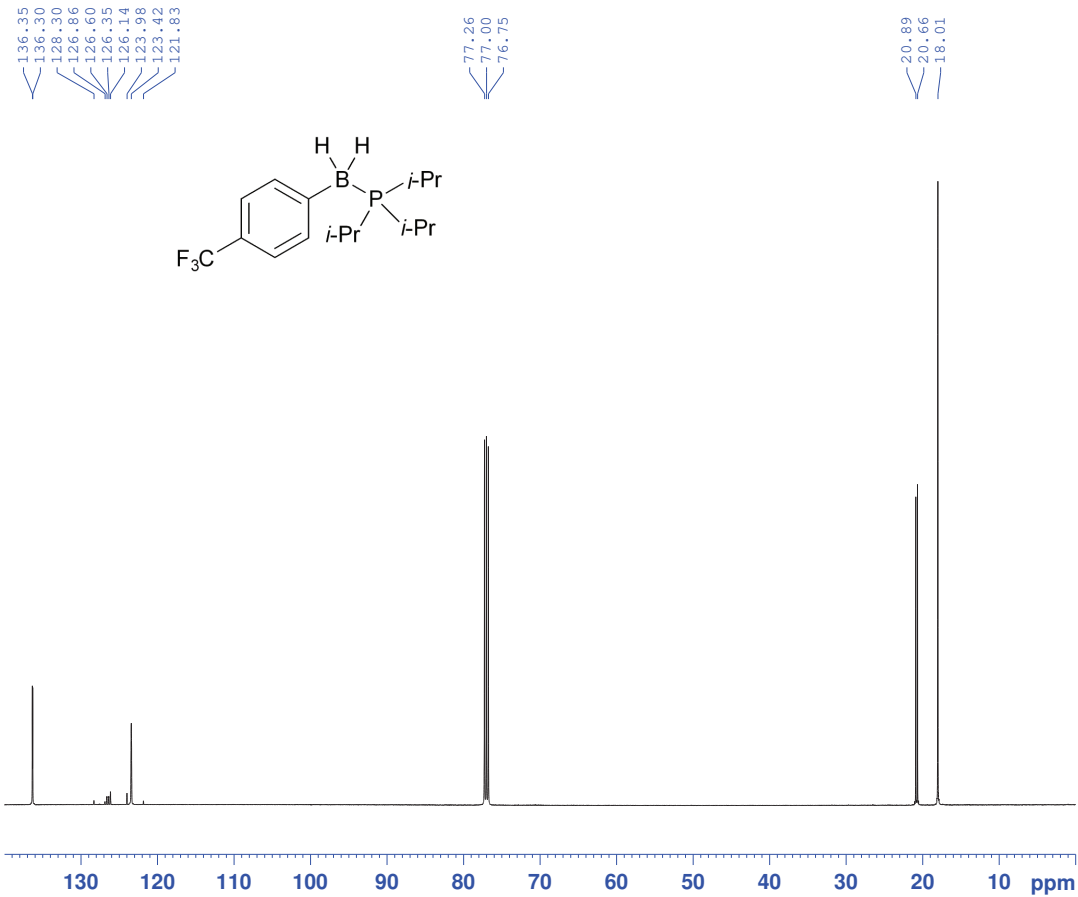

## IBB-nmr Analysis

NAME Mar08-2024  
 EXPNO 9  
 PROCNO 1  
 Date\_ 20240308  
 Time 5.14  
 INSTRUM av500  
 PROBHD 5 mm CPDCH 13C  
 PULPROG zgpg30  
 TD 65536  
 SOLVENT CDCl3  
 NS 1024  
 DS 4  
 SWH 30030.029 Hz  
 FIDRES 0.458222 Hz  
 AQ 1.0912410 sec  
 RG 35.9  
 DW 16.650 usec  
 DE 20.00 usec  
 TE 298.0 K  
 D1 2.00000000 sec  
 D11 0.03000000 sec  
 TD0 1

===== CHANNEL f1 =====  
 NUC1 13C  
 P1 10.00 usec  
 PL1 -5.00 dB  
 PL1W 14.29790783 W  
 SFO1 125.7703643 MHz  
 ===== CHANNEL f2 =====  
 CPDPRG2 waltz16  
 NUC2 1H  
 PCPD2 80.00 usec  
 PL2 -4.00 dB  
 PL12 14.06 dB  
 PL13 17.00 dB  
 PL2W 6.30857365 W  
 PL12W 0.09862794 W  
 PL13W 0.05011872 W  
 SFO2 500.1320005 MHz  
 SI 32768  
 SF 125.7577928 MHz  
 WDW EM  
 SSB 0  
 LB 1.00 Hz  
 GB 0  
 PC 0.30



4CF3PhBH2P(i-Pr)3

## IBB-nmr Analysis

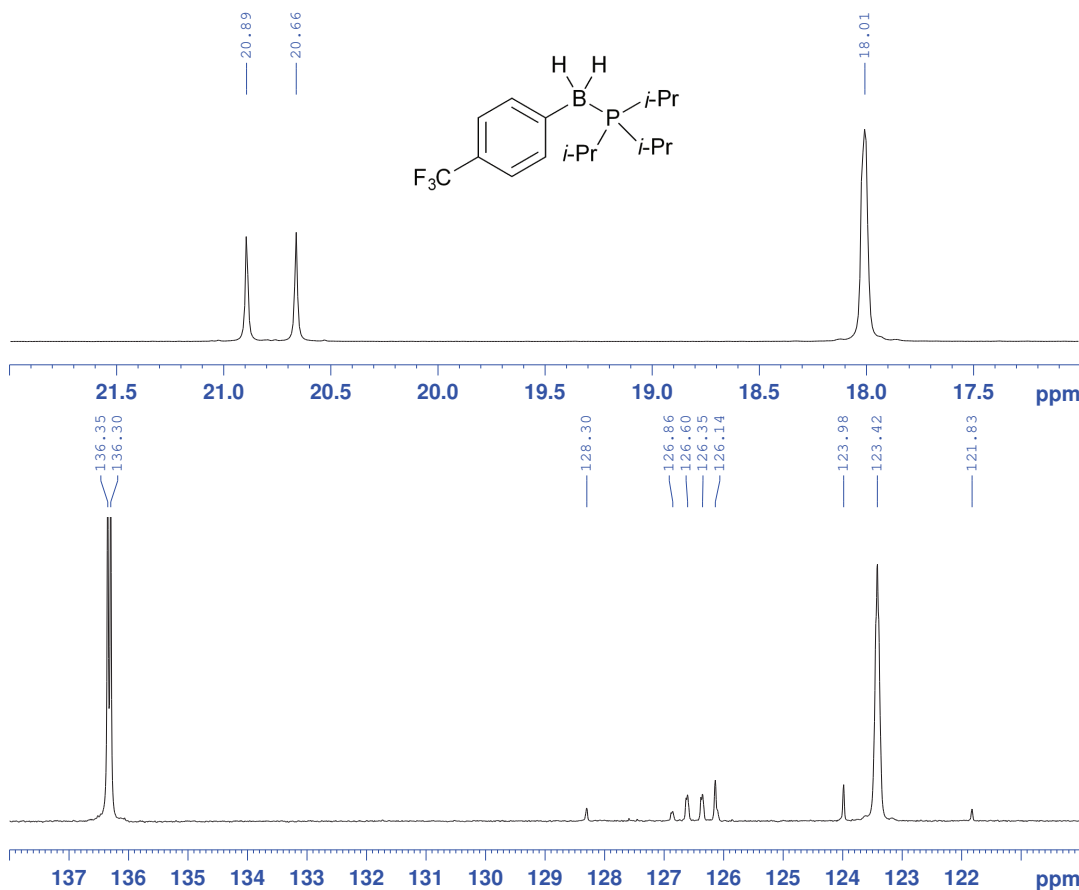

NAME Mar08-2024  
 EXPNO 9  
 PROCNO 1  
 Date\_ 20240308  
 Time 5.14  
 INSTRUM av500  
 PROBHD 5 mm CPDCH 13C  
 PULPROG zgpg30  
 TD 65536  
 SOLVENT CDCl3  
 NS 1024  
 DS 4  
 SWH 30030.029 Hz  
 FIDRES 0.458222 Hz  
 AQ 1.0912410 sec  
 RG 35.9  
 DW 16.650 usec  
 DE 20.00 usec  
 TE 298.0 K  
 D1 2.00000000 sec  
 D11 0.03000000 sec  
 TD0 1

===== CHANNEL f1 =====  
 NUC1 13C  
 P1 10.00 usec  
 PL1 -5.00 dB  
 PL1W 14.29790783 W  
 SFO1 125.7703643 MHz

===== CHANNEL f2 =====  
 CPDPRG2 waltz16  
 NUC2 1H  
 PCPD2 80.00 usec  
 PL2 -4.00 dB  
 PL12 14.06 dB  
 PL13 17.00 dB  
 PL2W 6.30957365 W  
 PL12W 0.09862794 W  
 PL13W 0.05011872 W  
 SFO2 500.1320005 MHz  
 SI 32768  
 SF 125.7577928 MHz  
 WDW EM  
 SSB 0  
 LB 1.00 Hz  
 GB 0  
 PC 0.30

4CF3PhBH2P(i-Pr)3

## IBB-nmr Analysis

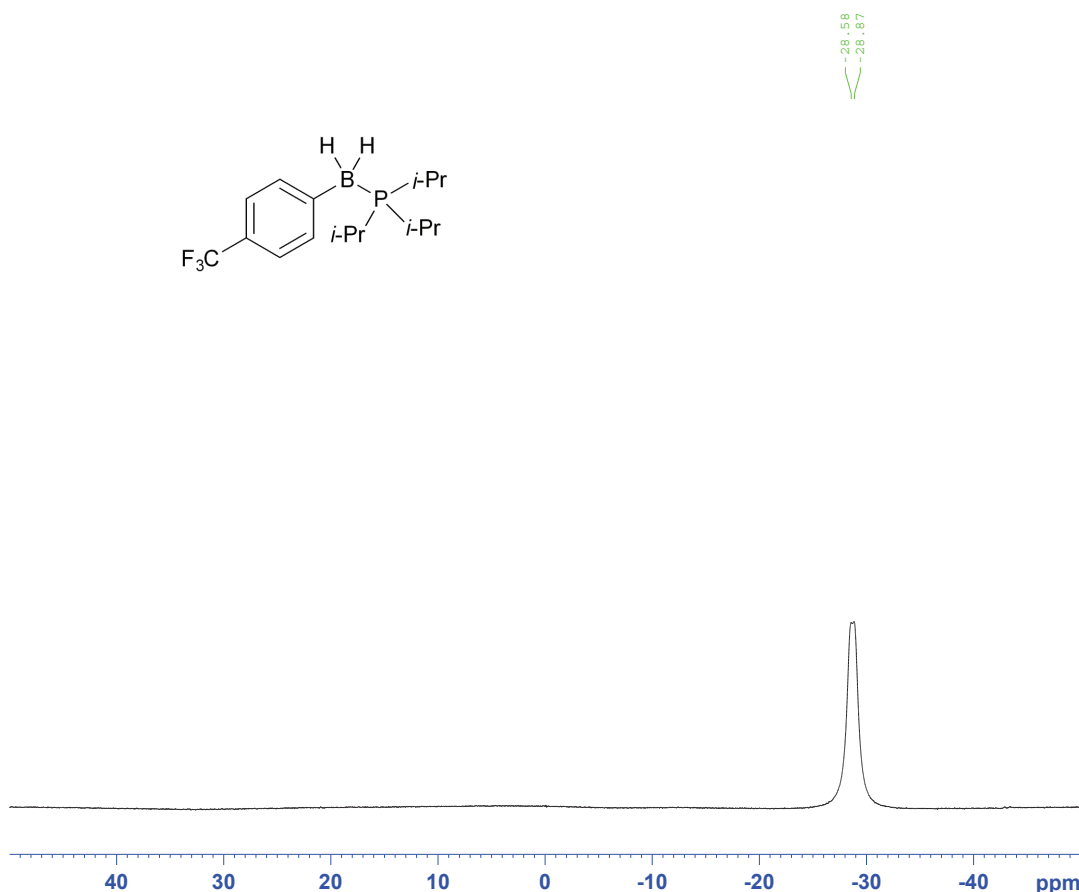

NAME Apr10-2022  
 EXPNO 5  
 PROCNO 1  
 Date\_ 20220410  
 Time 19.49  
 INSTRUM av400  
 PROBHD 5 mm PABBO BB-  
 PULPROG zgig  
 TD 32768  
 SOLVENT DMSO  
 NS 256  
 DS 4  
 SWH 20000.000 Hz  
 FIDRES 0.610352 Hz  
 AQ 0.8192500 sec  
 RG 203  
 DW 25.000 usec  
 DE 20.00 usec  
 TE 296.5 K  
 D1 1.00000000 sec  
 D11 0.03000000 sec  
 TD0 1

===== CHANNEL f1 =====  
 NUC1 11B  
 P1 6.30 usec  
 PL1 -2.00 dB  
 SFO1 128.3776050 MHz

===== CHANNEL f2 =====  
 CPDPRG2 waltz16  
 NUC2 1H  
 PCPD2 80.00 usec  
 PL2 -1.70 dB  
 PL12 13.80 dB  
 PL2W 14.48987389 W  
 PL12W 0.40838012 W  
 SFO2 400.1316005 MHz  
 SI 32768  
 SF 128.3776183 MHz  
 WDW EM  
 SSB 0  
 LB 2.00 Hz  
 GB 0  
 PC 1.40

4CF3PhBH2P(i-Pr)3

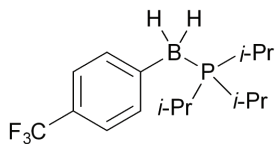

-60.62  
-60.63

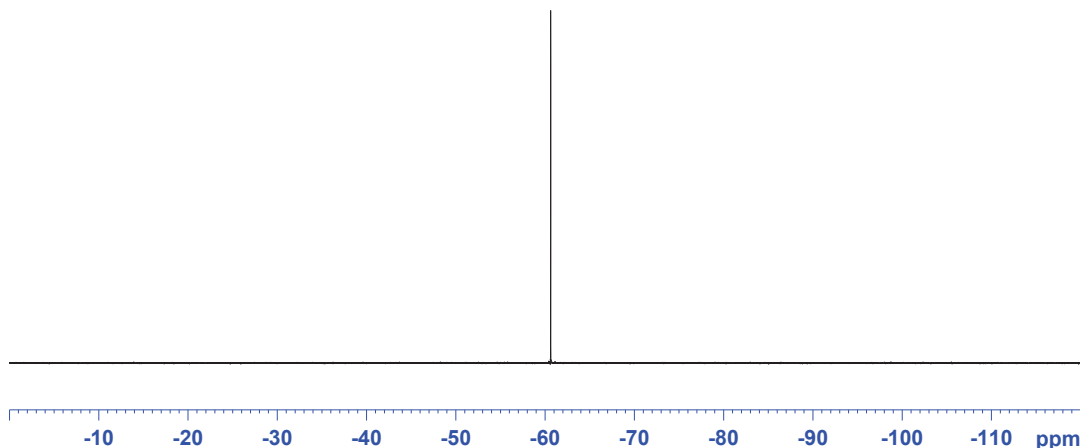

## IBB-nmr Analysis

```
NAME      May27-2022
EXPNO     2
PROCNO    1
Date_     20220527
Time      23.39
INSTRUM   av400
PROBHD    5 mm PABBO BB-
PULPROG   zgfhigqn
TD         131072
SOLVENT   DMSO
NS         8
DS         4
SWH        89285.711 Hz
FIDRES     0.681196 Hz
AQ         0.7340532 sec
RG         203
DW         5.600 usec
DE         6.50 usec
TE         297.2 K
D1         1.00000000 sec
D11        0.03000000 sec
D12        0.00002000 sec
TD0        1
```

```
===== CHANNEL f1 =====
NUC1       19F
P1         19.50 usec
PL1        -4.00 dB
PL1W       16.40489006 W
SFO1       376.4607164 MHz
```

```
===== CHANNEL f2 =====
CPDPRG2    waltz16
NUC2        1H
PCPD2       112.00 usec
PL2         -4.00 dB
PL12        18.00 dB
PL2W        24.60733604 W
PL12W       0.15526180 W
SFO2        400.1316005 MHz
SI          65536
SF          376.4984617 MHz
WDW         EM
SSB         0
LB          0.30 Hz
GB          0
PC          1.00
```

4CF3PhBH2P(i-Pr)3

24.32

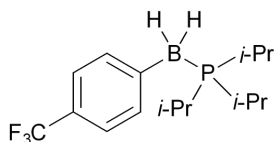

## IBB-nmr Analysis

```
NAME      Apr10-2022
EXPNO     7
PROCNO    1
Date_     20220410
Time      19.55
INSTRUM   av400
PROBHD    5 mm PABBO BB-
PULPROG   zg30
TD         65536
SOLVENT   DMSO
NS         16
DS         4
SWH        64102.563 Hz
FIDRES     0.978127 Hz
AQ         0.5112308 sec
RG         203
DW         7.800 usec
DE         6.50 usec
TE         296.0 K
D1         2.00000000 sec
D11        1
TD0        1
```

```
===== CHANNEL f1 =====
NUC1       31P
P1         10.00 usec
PL1        -0.70 dB
PL1W       30.10233498 W
SFO1       161.9674942 MHz
SI         32768
SF         161.9754962 MHz
WDW         EM
SSB         0
LB          1.00 Hz
GB          0
PC          1.40
```

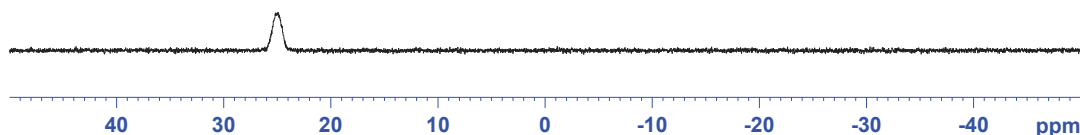

4CF3PhBH2PPh(i-Pr)2

B-4-(Trifluoromethyl)phenyl diisopropyl(phenyl)phosphine-borane (33)

## IBB-nmr Analysis

NAME May28-2022  
 EXPNO 1  
 PROCNO 1  
 Date\_ 20220528  
 Time\_ 19.10  
 INSTRUM av400  
 PROBHD 5 mm PABBO BB-  
 PULPROG zg30  
 TD 65536  
 SOLVENT DMSO  
 NS 16  
 DS 2  
 SWH 8223.685 Hz  
 FIDRES 0.125483 Hz  
 AQ 3.9846387 sec  
 RG 203  
 DW 60.800 usec  
 DE 6.50 usec  
 TE 297.1 K  
 D1 1.00000000 sec  
 TD0 1

===== CHANNEL f1 =====  
 NUC1 1H  
 P1 14.00 usec  
 PL1 -1.80 dB  
 PL1W 14.82738590 W  
 SFO1 400.1324710 MHz  
 SI 32768  
 SF 400.1300029 MHz  
 WDW EM  
 SSB 0  
 LB 0.30 Hz  
 GB 0  
 PC 1.00

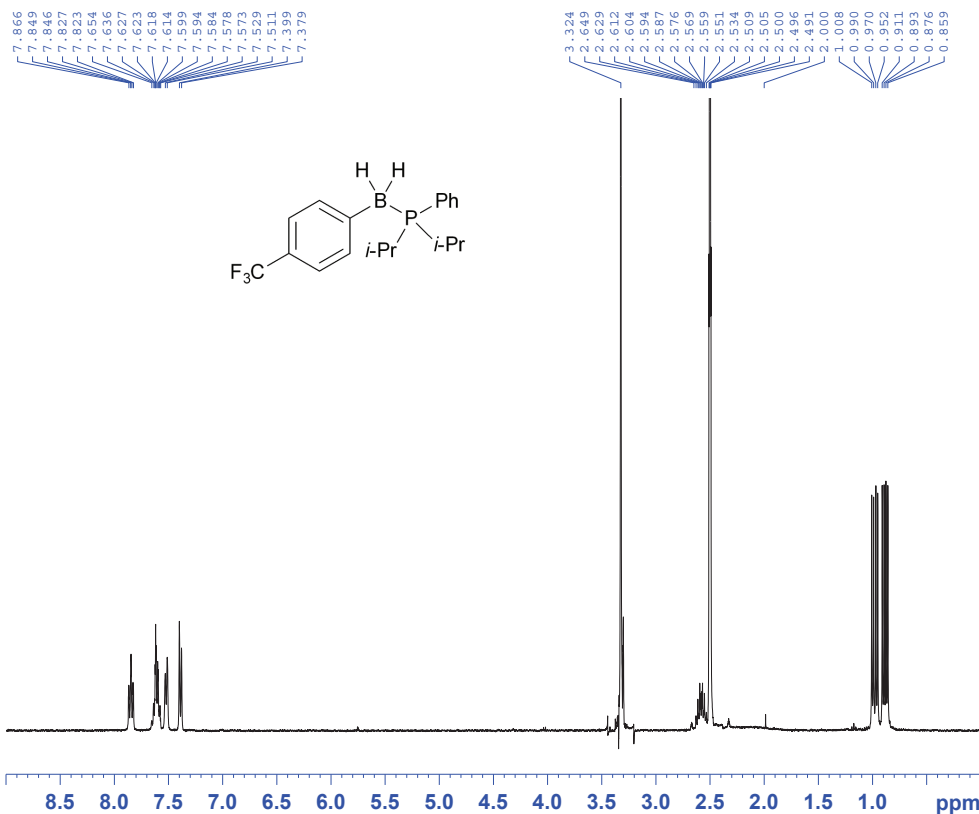

4CF3PhBH2PPh(i-Pr)2

## IBB-nmr Analysis

NAME Mar06-2024  
 EXPNO 13  
 PROCNO 1  
 Date\_ 20240306  
 Time\_ 20.54  
 INSTRUM av500  
 PROBHD 5 mm CPDCH 13C  
 PULPROG zgpg30  
 TD 65536  
 SOLVENT CDCl3  
 NS 1024  
 DS 4  
 SWH 30030.029 Hz  
 FIDRES 0.458222 Hz  
 AQ 1.0912410 sec  
 RG 35.9  
 DW 16.650 usec  
 DE 20.00 usec  
 TE 297.9 K  
 D1 2.00000000 sec  
 D11 0.03000000 sec  
 TD0 1

===== CHANNEL f1 =====  
 NUC1 13C  
 P1 10.00 usec  
 PL1 -5.00 dB  
 PL1W 14.29790783 W  
 SFO1 125.7703643 MHz

===== CHANNEL f2 =====  
 CPDPRG2 waltz16  
 NUC2 1H  
 PCPD2 80.00 usec  
 PL2 -4.00 dB  
 PL12 14.06 dB  
 PL13 17.00 dB  
 PL2W 6.30857365 W  
 PL12W 0.09862794 W  
 PL13W 0.05011872 W  
 SFO2 500.1320005 MHz  
 SI 32768  
 SF 125.7577918 MHz  
 WDW EM  
 SSB 0  
 LB 1.00 Hz  
 GB 0  
 PC 0.30

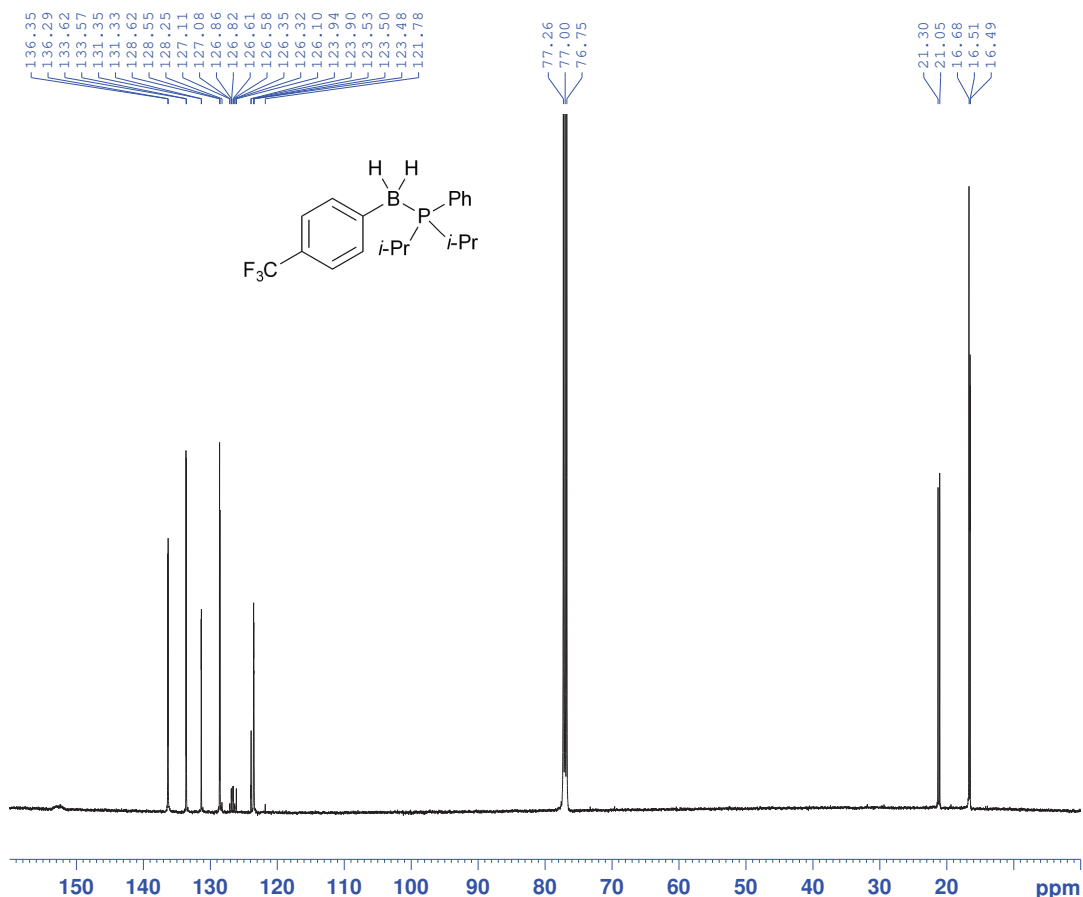

4CF3PhBH2PPh(i-Pr)2

## IBB-nmr Analysis

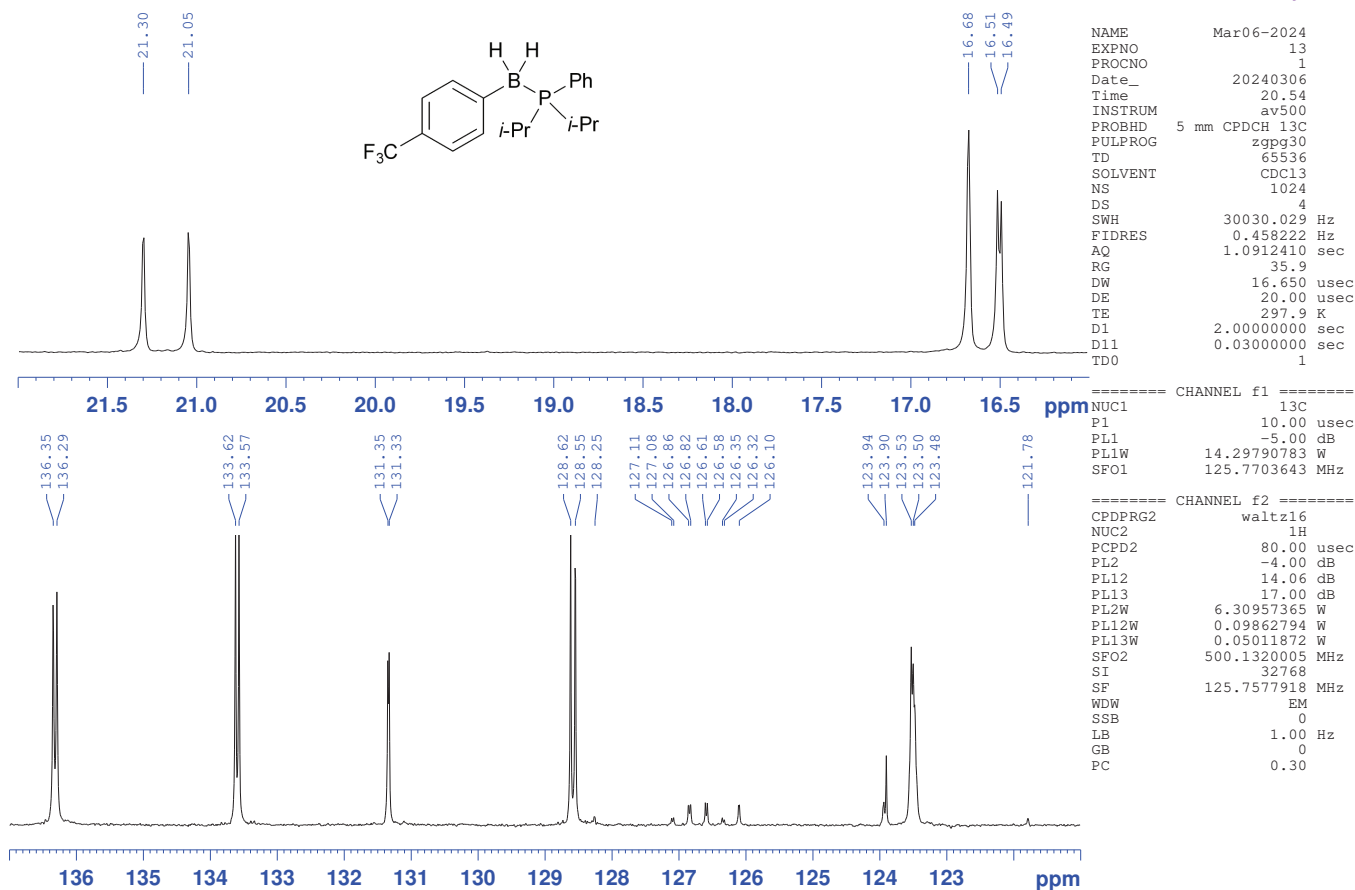

4CF3PhBH2PPh(i-Pr)2

## IBB-nmr Analysis

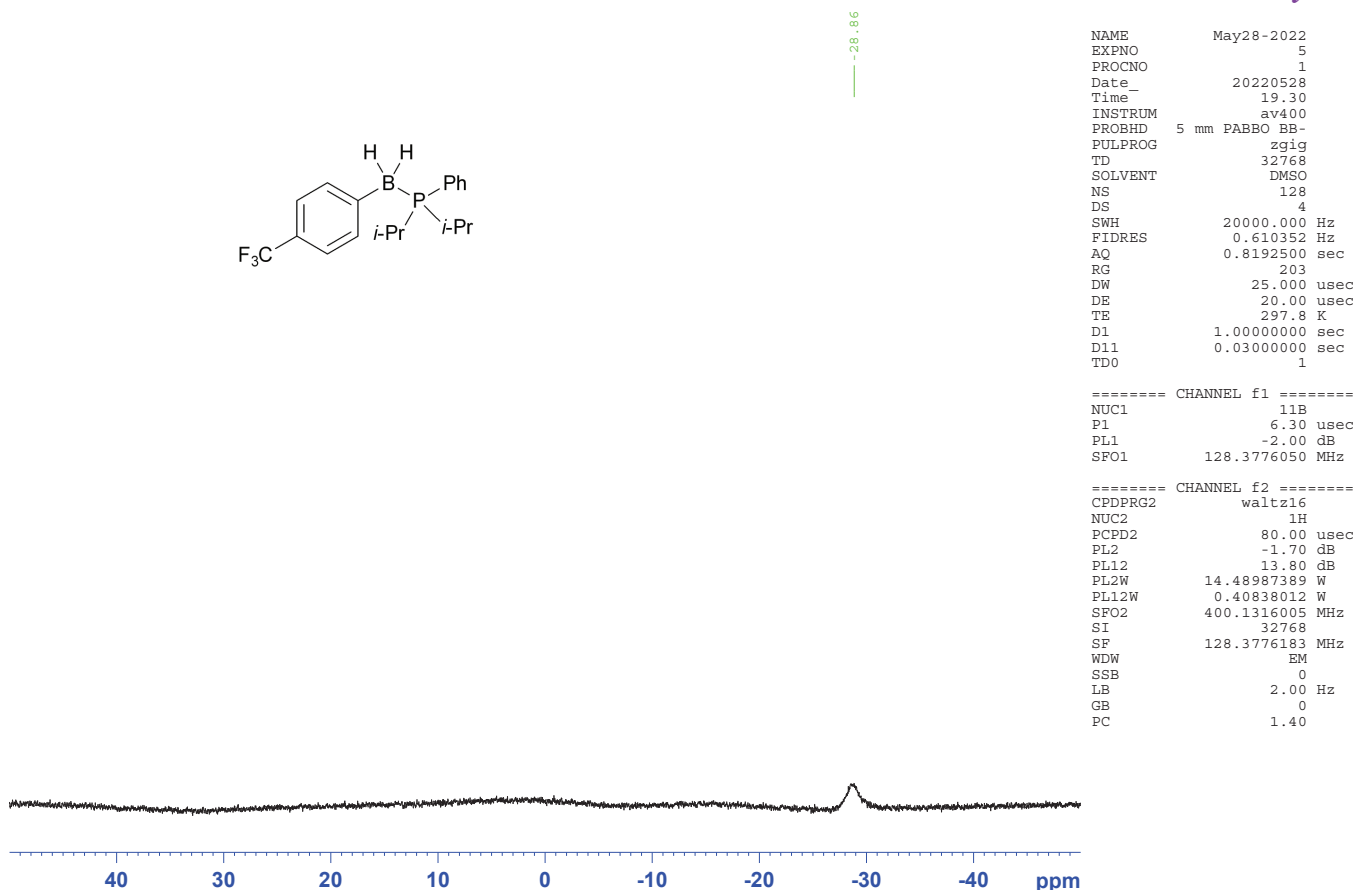

4CF3PhBH2PPh(i-Pr)2

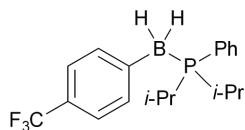

-60.67  
-60.68

## IBB-nmr Analysis

```
NAME      May28-2022
EXPNO      4
PROCNO     1
Date_      20220528
Time       19.23
INSTRUM    av400
PROBHD     5 mm PABBO BB-
PULPROG    zgfhigqn
TD         131072
SOLVENT    DMSO
NS          8
DS          4
SWH         89285.711 Hz
FIDRES      0.681196 Hz
AQ          0.7340532 sec
RG          203
DW          5.600 usec
DE          6.50 usec
TE          297.2 K
D1          1.00000000 sec
D11         0.03000000 sec
D12         0.00002000 sec
TD0         1
```

```
===== CHANNEL f1 =====
NUC1       19F
P1         19.50 usec
PL1        -4.00 dB
PL1W       16.40489006 W
SFO1       376.4607164 MHz
```

```
===== CHANNEL f2 =====
CPDPRG2    waltz16
NUC2        1H
PCPD2      112.00 usec
PL2         -4.00 dB
PL12        18.00 dB
PL2W       24.60733604 W
PL12W      0.15526180 W
SFO2       400.1316005 MHz
SI          65536
SF         376.4984617 MHz
WDW         EM
SSB          0
LB          0.30 Hz
GB          0
PC          1.00
```

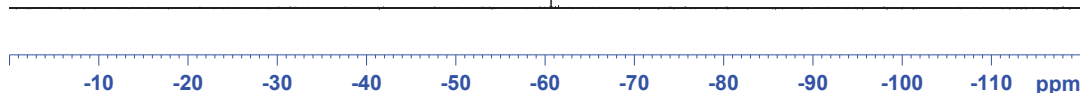

4CF3PhBH2PPh(i-Pr)2

22.49

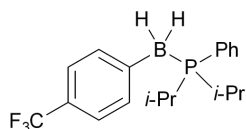

## IBB-nmr Analysis

```
NAME      May28-2022
EXPNO      3
PROCNO     1
Date_      20220528
Time       19.20
INSTRUM    av400
PROBHD     5 mm PABBO BB-
PULPROG    zg30
TD         65536
SOLVENT    DMSO
NS         128
DS          4
SWH         64102.563 Hz
FIDRES      0.978127 Hz
AQ          0.5112308 sec
RG          203
DW          7.800 usec
DE          6.50 usec
TE          297.1 K
D1          2.00000000 sec
TD0         1
```

```
===== CHANNEL f1 =====
NUC1       31P
P1         10.00 usec
PL1        -0.70 dB
PL1W       30.10233498 W
SFO1       161.9674942 MHz
SI         32768
SF         161.9754962 MHz
WDW         EM
SSB          0
LB          1.00 Hz
GB          0
PC          1.40
```

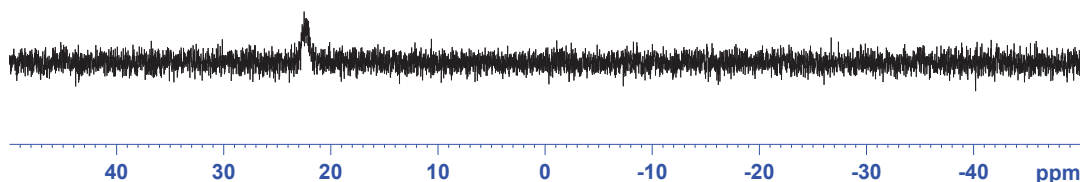

4CF3PhBH2P(cyclopropyl)3 8-15Fr B-4-(Trifluoromethyl)phenyl tricyclopropylphosphine-borane (34)

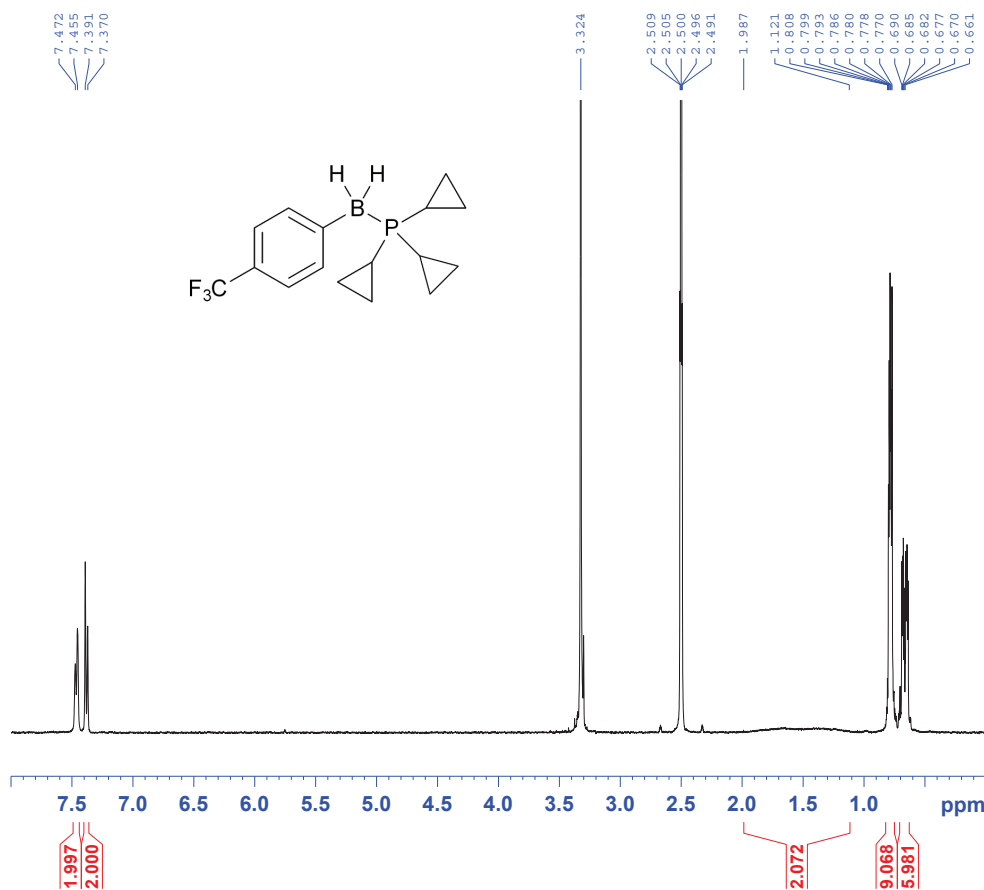

IBB-nmr Analysis

NAME July14-2022  
 EXPNO 1  
 PROCNO 1  
 Date\_ 20220713  
 Time\_ 23.54  
 INSTRUM av400  
 PROBHD 5 mm PABBO BB-  
 PULPROG zg30  
 TD 65536  
 SOLVENT DMSO  
 NS 16  
 DS 2  
 SWH 8223.685 Hz  
 FIDRES 0.125483 Hz  
 AQ 3.9846387 sec  
 RG 203  
 DW 60.800 usec  
 DE 6.50 usec  
 TE 297.1 K  
 D1 1.00000000 sec  
 TD0 1

===== CHANNEL f1 =====  
 NUC1 1H  
 P1 14.00 usec  
 PL1 -1.80 dB  
 PL1W 14.82738590 W  
 SFO1 400.1324710 MHz  
 SI 32768  
 SF 400.1300029 MHz  
 WDW EM  
 SSB 0  
 LB 0.30 Hz  
 GB 0  
 PC 1.00

4CF3PhBH2P(cyclopropyl)3

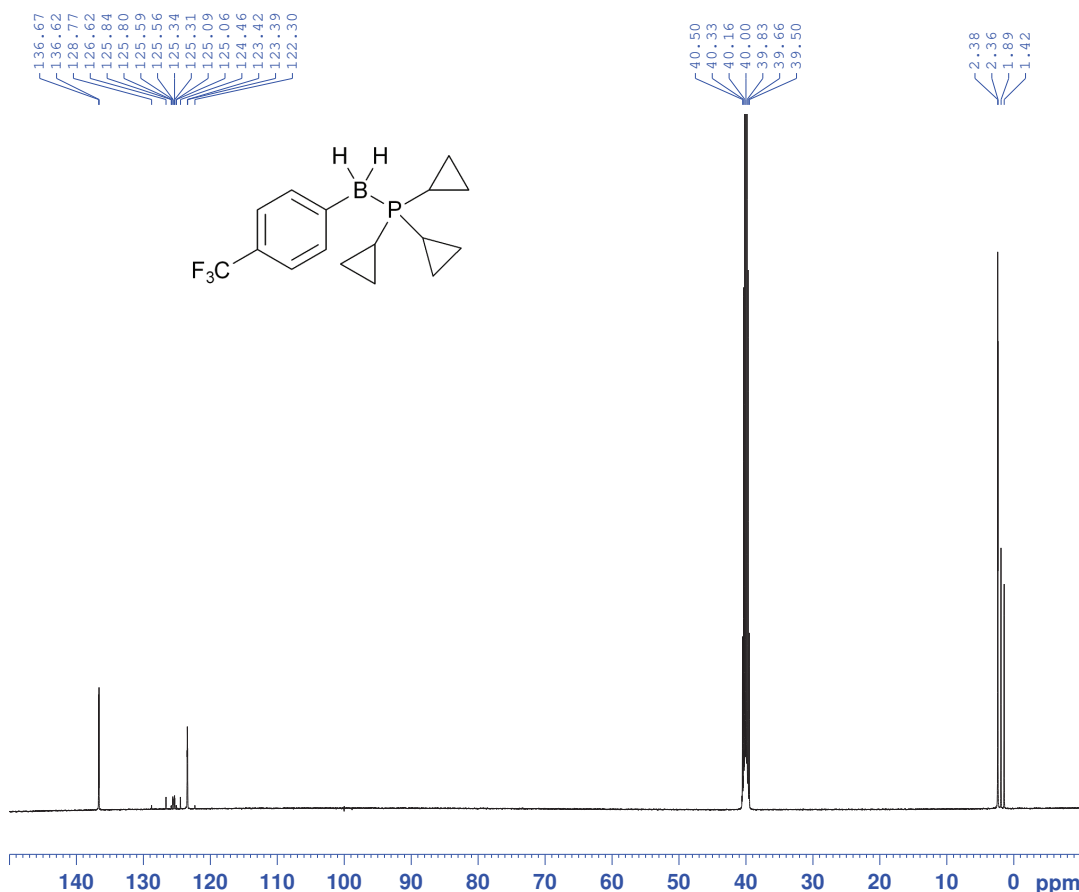

IBB-nmr Analysis

NAME Mar06-2024  
 EXPNO 5  
 PROCNO 1  
 Date\_ 20240306  
 Time\_ 1.42  
 INSTRUM av500  
 PROBHD 5 mm CPDCH 13C  
 PULPROG zgpg30  
 TD 65536  
 SOLVENT DMSO  
 NS 256  
 DS 4  
 SWH 30030.029 Hz  
 FIDRES 0.458222 Hz  
 AQ 1.0912410 sec  
 RG 35.9  
 DW 16.650 usec  
 DE 20.00 usec  
 TE 298.0 K  
 D1 2.00000000 sec  
 D11 0.03000000 sec  
 TD0 1

===== CHANNEL f1 =====  
 NUC1 13C  
 P1 10.00 usec  
 PL1 -5.00 dB  
 PL1W 14.29790783 W  
 SFO1 125.7703643 MHz

===== CHANNEL f2 =====  
 CPDPRG2 waltz16  
 NUC2 1H  
 PCPD2 80.00 usec  
 PL2 -4.00 dB  
 PL12 14.06 dB  
 PL13 17.00 dB  
 PL2W 6.30857365 W  
 PL12W 0.09862794 W  
 PL13W 0.05011872 W  
 SFO2 500.1320005 MHz  
 SI 32768  
 SF 125.7577875 MHz  
 WDW EM  
 SSB 0  
 LB 1.00 Hz  
 GB 0  
 PC 0.30

4CF3PhBH2P (cyclopropyl) 3

## IBB-nmr Analysis

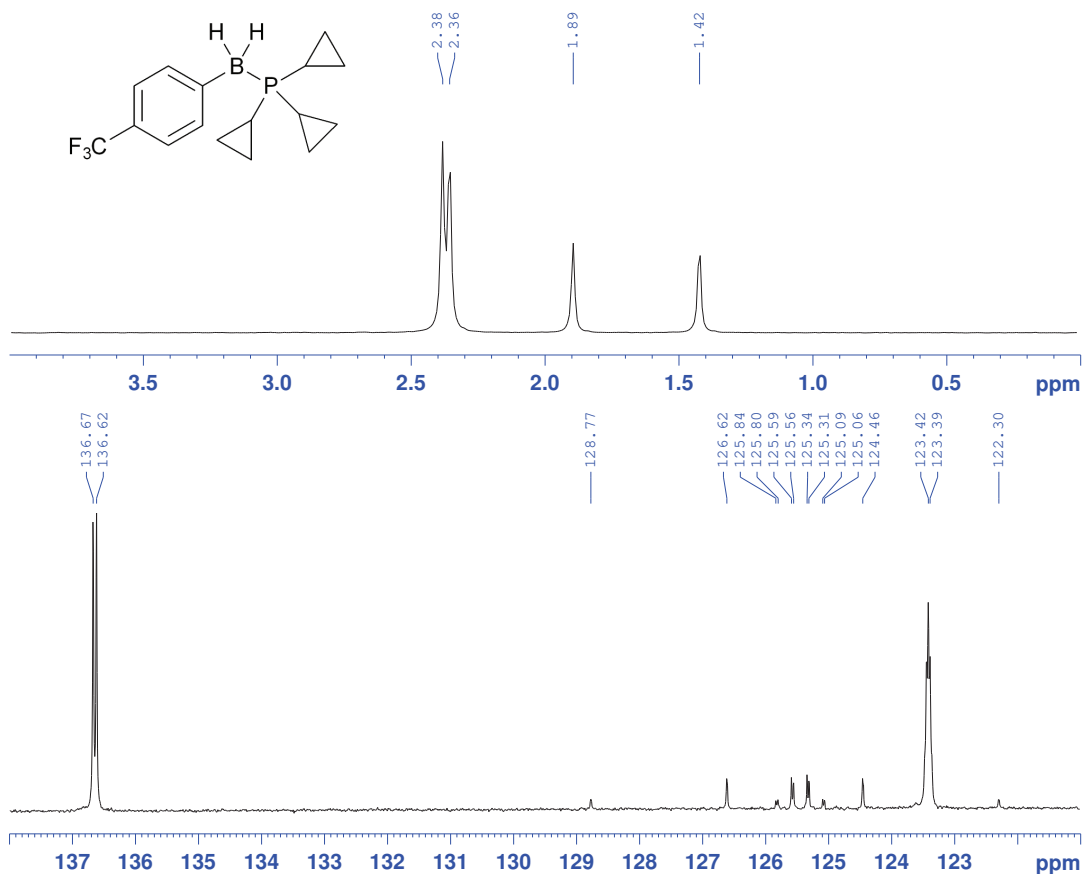

NAME Mar06-2024  
 EXPNO 5  
 PROCNO 1  
 Date\_ 20240306  
 Time 1.42  
 INSTRUM av500  
 PROBHD 5 mm CPDCH 13C  
 PULPROG zgpg30  
 TD 65536  
 SOLVENT DMSO  
 NS 256  
 DS 4  
 SWH 30030.029 Hz  
 FIDRES 0.458222 Hz  
 AQ 1.0912410 sec  
 RG 35.9  
 DW 16.650 usec  
 DE 20.00 usec  
 TE 298.0 K  
 D1 2.00000000 sec  
 D11 0.03000000 sec  
 TD0 1

===== CHANNEL f1 =====  
 NUC1 13C  
 P1 10.00 usec  
 PL1 -5.00 dB  
 PL1W 14.29790783 W  
 SFO1 125.7703643 MHz

===== CHANNEL f2 =====  
 CPDPRG2 waltz16  
 NUC2 1H  
 PCPD2 80.00 usec  
 PL2 -4.00 dB  
 PL12 14.06 dB  
 PL13 17.00 dB  
 PL2W 6.30957365 W  
 PL12W 0.09862794 W  
 PL13W 0.05011872 W  
 SFO2 500.1320005 MHz  
 SI 32768  
 SF 125.7577875 MHz  
 WDW EM  
 SSB 0  
 LB 1.00 Hz  
 GB 0  
 PC 0.30

4CF3PhBH2P (cyclopropyl) 3 8-15Fr

## IBB-nmr Analysis

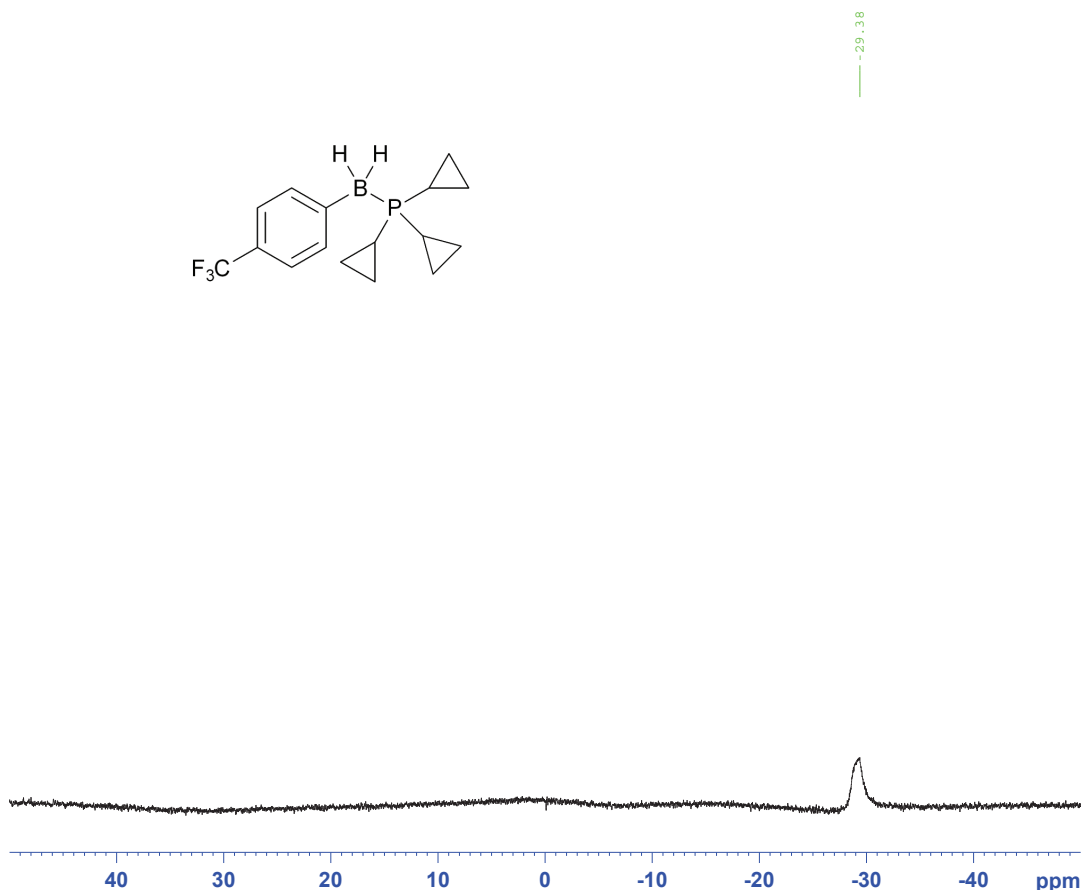

NAME July14-2022  
 EXPNO 4  
 PROCNO 1  
 Date\_ 20220714  
 Time 0.10  
 INSTRUM av400  
 PROBHD 5 mm PABBO BB-  
 PULPROG zgig  
 TD 32768  
 SOLVENT DMSO  
 NS 128  
 DS 4  
 SWH 20000.000 Hz  
 FIDRES 0.610352 Hz  
 AQ 0.8192500 sec  
 RG 203  
 DW 25.000 usec  
 DE 20.00 usec  
 TE 297.8 K  
 D1 1.00000000 sec  
 D11 0.03000000 sec  
 TD0 1

===== CHANNEL f1 =====  
 NUC1 11B  
 P1 6.30 usec  
 PL1 -2.00 dB  
 SFO1 128.3776050 MHz

===== CHANNEL f2 =====  
 CPDPRG2 waltz16  
 NUC2 1H  
 PCPD2 80.00 usec  
 PL2 -1.70 dB  
 PL12 13.80 dB  
 PL2W 14.48987389 W  
 PL12W 0.40838012 W  
 SFO2 400.1316005 MHz  
 SI 32768  
 SF 128.3776183 MHz  
 WDW EM  
 SSB 0  
 LB 2.00 Hz  
 GB 0  
 PC 1.40

4CF3PhBH2P(cyclopropyl)3 8-15Fr

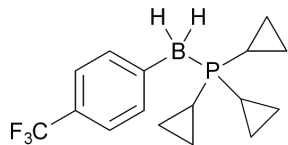

-60.62  
-60.63

## IBB-nmr Analysis

```

NAME      July14-2022
EXPNO     2
PROCNO    1
Date_     20220713
Time      23.57
INSTRUM   av400
PROBHD    5 mm PABBO BB-
PULPROG   zgfhigqn
TD         131072
SOLVENT   DMSO
NS         8
DS         4
SWH        89285.711 Hz
FIDRES     0.681196 Hz
AQ         0.7340532 sec
RG         203
DW         5.600 usec
DE         6.50 usec
TE         297.2 K
D1         1.00000000 sec
D11        0.03000000 sec
D12        0.00002000 sec
TD0        1
  
```

```

===== CHANNEL f1 =====
NUC1      19F
P1        19.50 usec
PL1       -4.00 dB
PL1W      16.40489006 W
SFO1      376.4607164 MHz
  
```

```

===== CHANNEL f2 =====
CPDPRG2   waltz16
NUC2       1H
PCPD2     112.00 usec
PL2        -4.00 dB
PL12       18.00 dB
PL2W      24.60733604 W
PL12W     0.15526180 W
SFO2      400.1316005 MHz
SI         65536
SF        376.4984617 MHz
WDW        EM
SSB         0
LB         0.30 Hz
GB          0
PC          1.00
  
```

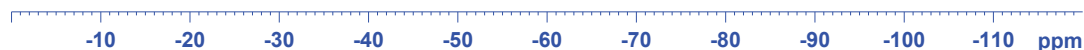

4CF3PhBH2P(cyclopropyl)3 8-15Fr

17.69

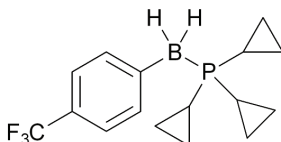

## IBB-nmr Analysis

```

NAME      July14-2022
EXPNO     3
PROCNO    1
Date_     20220714
Time      0.03
INSTRUM   av400
PROBHD    5 mm PABBO BB-
PULPROG   zg30
TD         65536
SOLVENT   DMSO
NS         64
DS         4
SWH        64102.563 Hz
FIDRES     0.978127 Hz
AQ         0.5112308 sec
RG         203
DW         7.800 usec
DE         6.50 usec
TE         297.1 K
D1         2.00000000 sec
TD0        1
  
```

```

===== CHANNEL f1 =====
NUC1      31P
P1        10.00 usec
PL1       -0.70 dB
PL1W      30.10233498 W
SFO1      161.9674942 MHz
SI         32768
SF        161.9754962 MHz
WDW        EM
SSB         0
LB         1.00 Hz
GB          0
PC          1.40
  
```

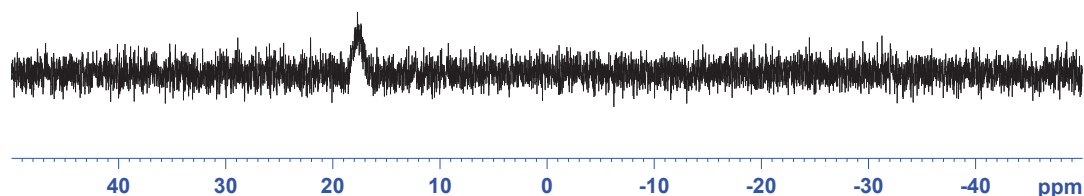



4CF3PhBH2P(n-Bu)3 recolumn

B-4-(Trifluoromethyl)phenyl tri-n-butylphosphine-borane (35)

## IBB-nmr Analysis

NAME July26-2022  
 EXPNO 1  
 PROCNO 1  
 Date\_ 20220726  
 Time\_ 21.28  
 INSTRUM av400  
 PROBHD 5 mm PABBO BB-  
 PULPROG zg30  
 TD 65536  
 SOLVENT DMSO  
 NS 16  
 DS 2  
 SWH 8223.685 Hz  
 FIDRES 0.125483 Hz  
 AQ 3.9846387 sec  
 RG 203  
 DW 60.800 usec  
 DE 6.50 usec  
 TE 297.8 K  
 D1 1.00000000 sec  
 TD0 1

===== CHANNEL f1 =====  
 NUC1 1H  
 P1 14.00 usec  
 PL1 -1.80 dB  
 PL1W 14.82738590 W  
 SFO1 400.1324710 MHz  
 SI 32768  
 SF 400.1300029 MHz  
 WDW EM  
 SSB 0  
 LB 0.30 Hz  
 GB 0  
 PC 1.00

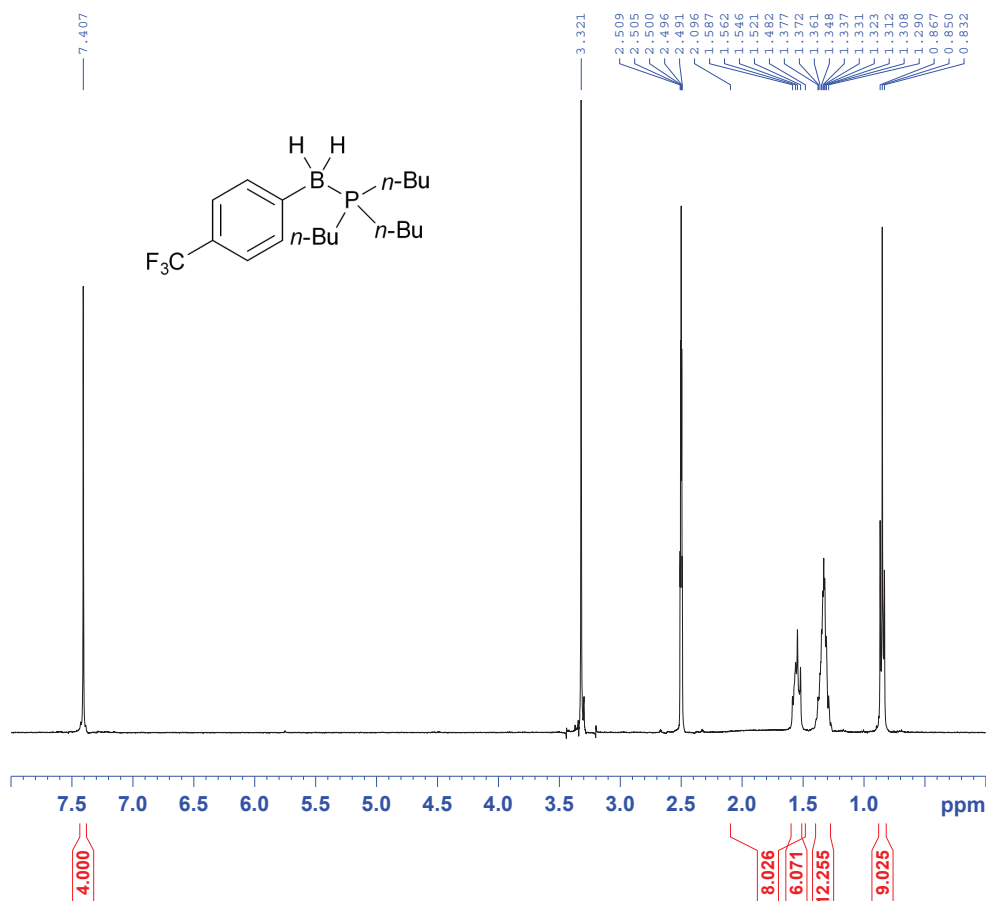

4CF3PhBH2P(n-Bu)3 recolumn

## IBB-nmr Analysis

NAME July28-2022  
 EXPNO 2  
 PROCNO 1  
 Date\_ 20220729  
 Time\_ 5.28  
 INSTRUM av500  
 PROBHD 5 mm CPDCH 13C  
 PULPROG zgpg30  
 TD 65536  
 SOLVENT DMSO  
 NS 8192  
 DS 4  
 SWH 30030.029 Hz  
 FIDRES 0.458222 Hz  
 AQ 1.0912410 sec  
 RG 35.9  
 DW 16.650 usec  
 DE 20.00 usec  
 TE 298.0 K  
 D1 2.00000000 sec  
 D11 0.03000000 sec  
 TD0 1

===== CHANNEL f1 =====  
 NUC1 13C  
 P1 10.00 usec  
 PL1 -5.00 dB  
 PL1W 14.29790783 W  
 SFO1 125.7703643 MHz

===== CHANNEL f2 =====  
 CPDPRG2 waltz16  
 NUC2 1H  
 PCPD2 80.00 usec  
 PL2 -4.00 dB  
 PL12 14.06 dB  
 PL13 17.00 dB  
 PL2W 6.30857365 W  
 PL12W 0.09862794 W  
 PL13W 0.05011872 W  
 SFO2 500.1320005 MHz  
 SI 32768  
 SF 125.7577866 MHz  
 WDW EM  
 SSB 0  
 LB 1.00 Hz  
 GB 0  
 PC 0.30

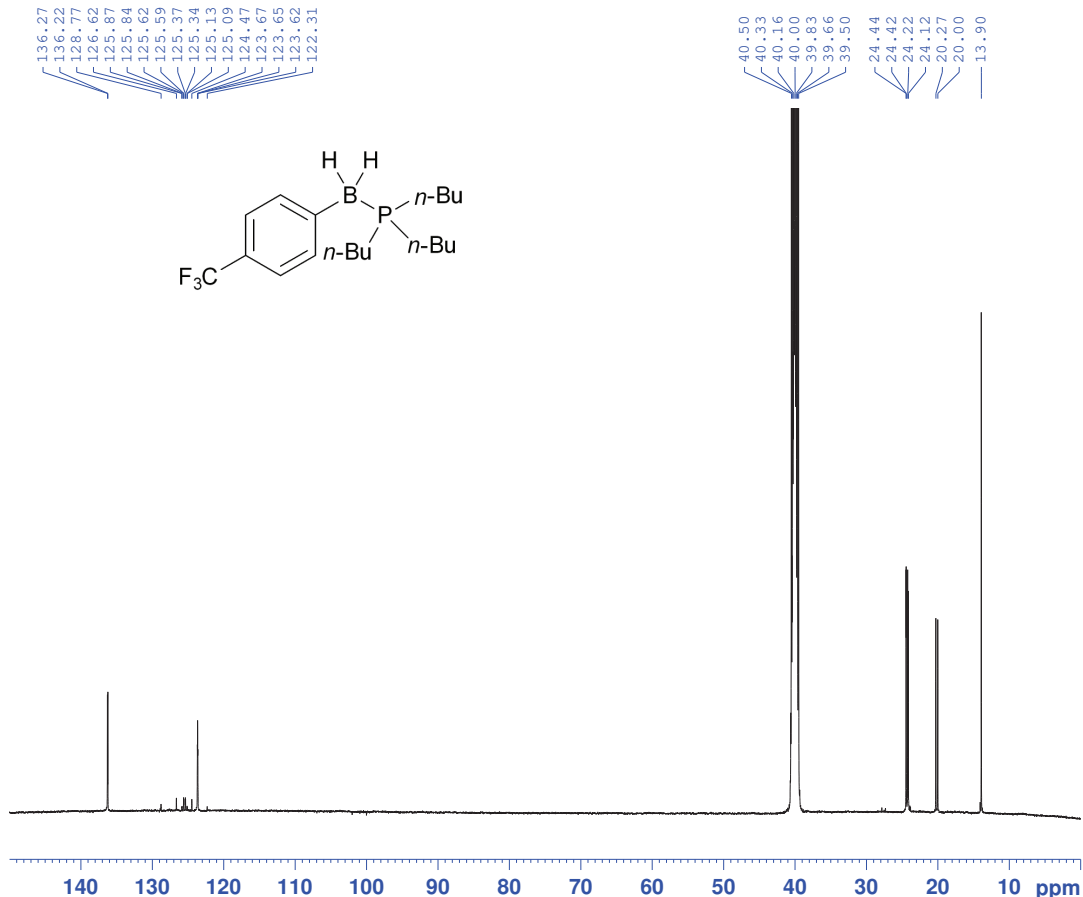

4CF3PhBH2P(n-Bu)3 recolumn

## IBB-nmr Analysis

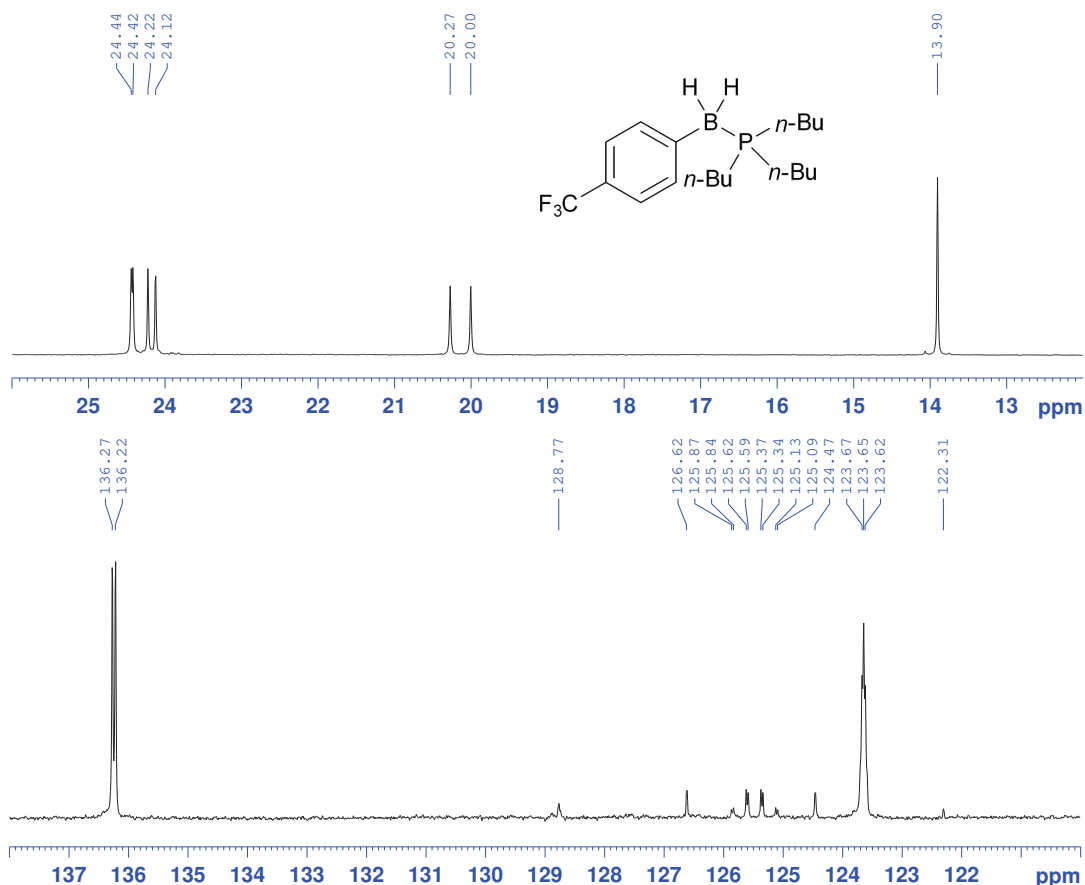

NAME July28-2022  
 EXPNO 2  
 PROCNO 1  
 Date\_ 20220729  
 Time 5.28  
 INSTRUM av500  
 PROBHD 5 mm CPDCH 13C  
 PULPROG zgpg30  
 TD 65536  
 SOLVENT DMSO  
 NS 8192  
 DS 4  
 SWH 30030.029 Hz  
 FIDRES 0.458222 Hz  
 AQ 1.0912410 sec  
 RG 35.9  
 DW 16.650 usec  
 DE 20.00 usec  
 TE 298.0 K  
 D1 2.00000000 sec  
 D11 0.03000000 sec  
 TD0 1

===== CHANNEL f1 =====  
 NUC1 13C  
 P1 10.00 usec  
 PL1 -5.00 dB  
 PL1W 14.29790783 W  
 SFO1 125.7703643 MHz

===== CHANNEL f2 =====  
 CPDPRG2 waltz16  
 NUC2 1H  
 PCPD2 80.00 usec  
 PL2 -4.00 dB  
 PL12 14.06 dB  
 PL13 17.00 dB  
 PL2W 6.30957365 W  
 PL12W 0.09862794 W  
 PL13W 0.05011872 W  
 SFO2 500.1320005 MHz  
 SI 32768  
 SF 125.7577866 MHz  
 WDW EM  
 SSB 0  
 LB 1.00 Hz  
 GB 0  
 PC 0.30

4CF3PhBH2P(n-Bu)3 recolumn

## IBB-nmr Analysis

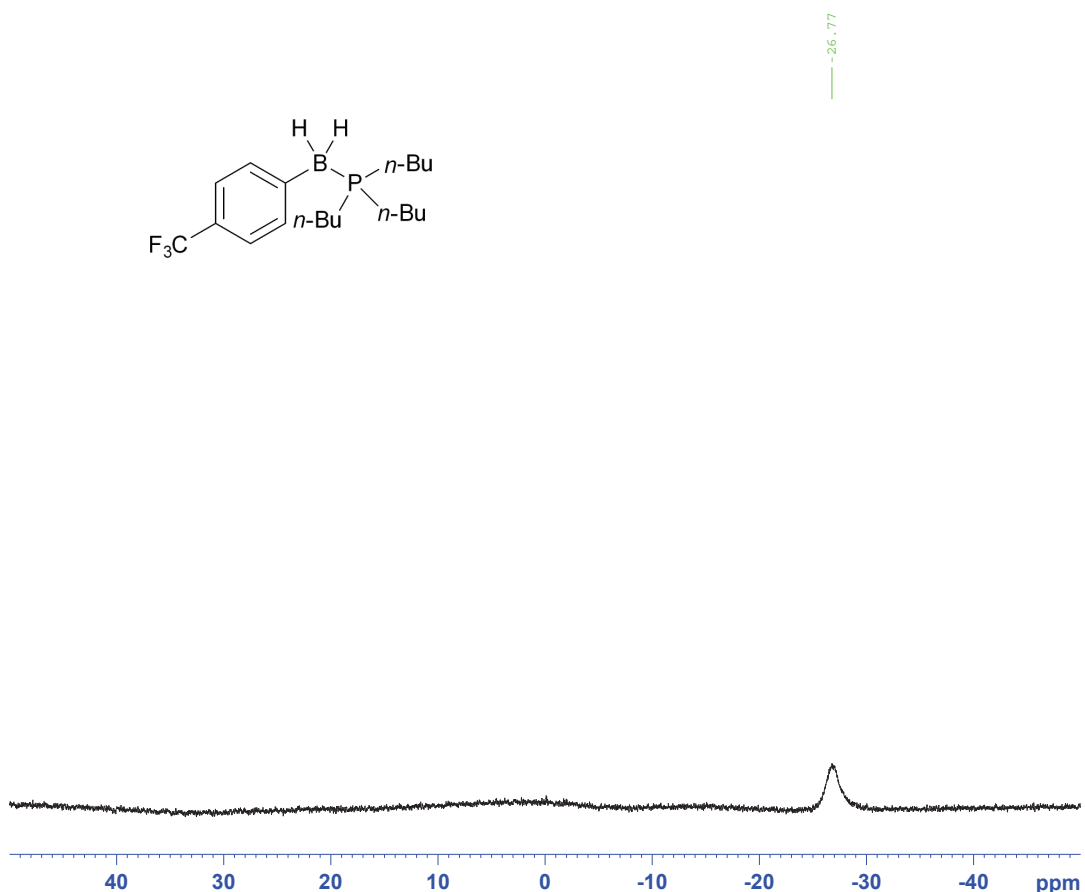

NAME July26-2022  
 EXPNO 3  
 PROCNO 1  
 Date\_ 20220726  
 Time 21.39  
 INSTRUM av400  
 PROBHD 5 mm PABBO BB-  
 PULPROG zgig  
 TD 32768  
 SOLVENT DMSO  
 NS 128  
 DS 4  
 SWH 20000.000 Hz  
 FIDRES 0.610352 Hz  
 AQ 0.8192500 sec  
 RG 203  
 DW 25.000 usec  
 DE 20.00 usec  
 TE 298.4 K  
 D1 1.00000000 sec  
 D11 0.03000000 sec  
 TD0 1

===== CHANNEL f1 =====  
 NUC1 11B  
 P1 6.30 usec  
 PL1 -2.00 dB  
 SFO1 128.3776050 MHz

===== CHANNEL f2 =====  
 CPDPRG2 waltz16  
 NUC2 1H  
 PCPD2 80.00 usec  
 PL2 -1.70 dB  
 PL12 13.80 dB  
 PL2W 14.48987389 W  
 PL12W 0.40838012 W  
 SFO2 400.1316005 MHz  
 SI 32768  
 SF 128.3776183 MHz  
 WDW EM  
 SSB 0  
 LB 2.00 Hz  
 GB 0  
 PC 1.40

4CF3PhBH2P(n-Bu)3 recolumn

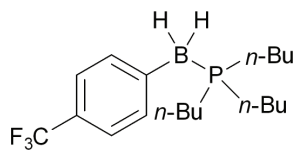

-60.65  
-60.66

## IBB-nmr Analysis

```
NAME      July26-2022
EXPNO     2
PROCNO    1
Date_     20220726
Time      21.32
INSTRUM   av400
PROBHD    5 mm PABBO BB-
PULPROG   zgfhgqn
TD         131072
SOLVENT   DMSO
NS         8
DS         4
SWH        89285.711 Hz
FIDRES     0.681196 Hz
AQ         0.7340532 sec
RG         203
DW         5.600 usec
DE         6.50 usec
TE         297.9 K
D1         1.00000000 sec
D11        0.03000000 sec
D12        0.00002000 sec
TD0        1
```

```
===== CHANNEL f1 =====
NUC1       19F
P1         19.50 usec
PL1        -4.00 dB
PL1W       16.40489006 W
SFO1       376.4607164 MHz
```

```
===== CHANNEL f2 =====
CPDPRG2    waltz16
NUC2        1H
PCPD2      112.00 usec
PL2         -4.00 dB
PL12        18.00 dB
PL2W       24.60733604 W
PL12W      0.15526180 W
SFO2       400.1316005 MHz
SI          65536
SF         376.4984617 MHz
WDW         EM
SSB         0
LB          0.30 Hz
GB          0
PC          1.00
```

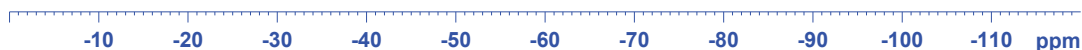

4CF3PhBH2P(n-Bu)3 recolumn

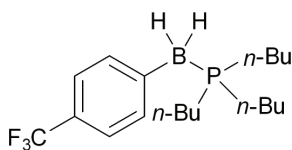

7.35

## IBB-nmr Analysis

```
NAME      July26-2022
EXPNO     4
PROCNO    1
Date_     20220726
Time      21.45
INSTRUM   av400
PROBHD    5 mm PABBO BB-
PULPROG   zg30
TD         65536
SOLVENT   DMSO
NS         64
DS         4
SWH        64102.563 Hz
FIDRES     0.978127 Hz
AQ         0.5112308 sec
RG         203
DW         7.800 usec
DE         6.50 usec
TE         297.8 K
D1         2.00000000 sec
TD0        1
```

```
===== CHANNEL f1 =====
NUC1       31P
P1         10.00 usec
PL1        -0.70 dB
PL1W       30.10233498 W
SFO1       161.9674942 MHz
SI         32768
SF         161.9754962 MHz
WDW         EM
SSB         0
LB          1.00 Hz
GB          0
PC          1.40
```

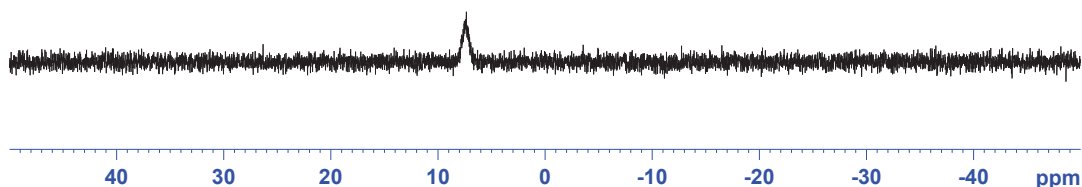

4-CF<sub>3</sub>PhBH<sub>2</sub>P(cyclopentyl)<sub>3</sub>

B-4-(Trifluoromethyl)phenyl tricyclopentylphosphine-borane (36)

## IBB-nmr Analysis

NAME Feb17-2022  
 EXPNO 2  
 PROCNO 1  
 Date\_ 20220217  
 Time\_ 22.09  
 INSTRUM av400  
 PROBHD 5 mm PABBO BB-  
 PULPROG zg30  
 TD 65536  
 SOLVENT DMSO  
 NS 4  
 DS 2  
 SWH 8223.685 Hz  
 FIDRES 0.125483 Hz  
 AQ 3.9846387 sec  
 RG 203  
 DW 60.800 usec  
 DE 6.50 usec  
 TE 296.2 K  
 D1 1.00000000 sec  
 TD0 1

===== CHANNEL f1 =====  
 NUC1 1H  
 P1 14.00 usec  
 PL1 -1.80 dB  
 PL1W 14.82738590 W  
 SFO1 400.1324710 MHz  
 SI 32768  
 SF 400.1300031 MHz  
 WDW EM  
 SSB 0  
 LB 0.30 Hz  
 GB 0  
 PC 1.00

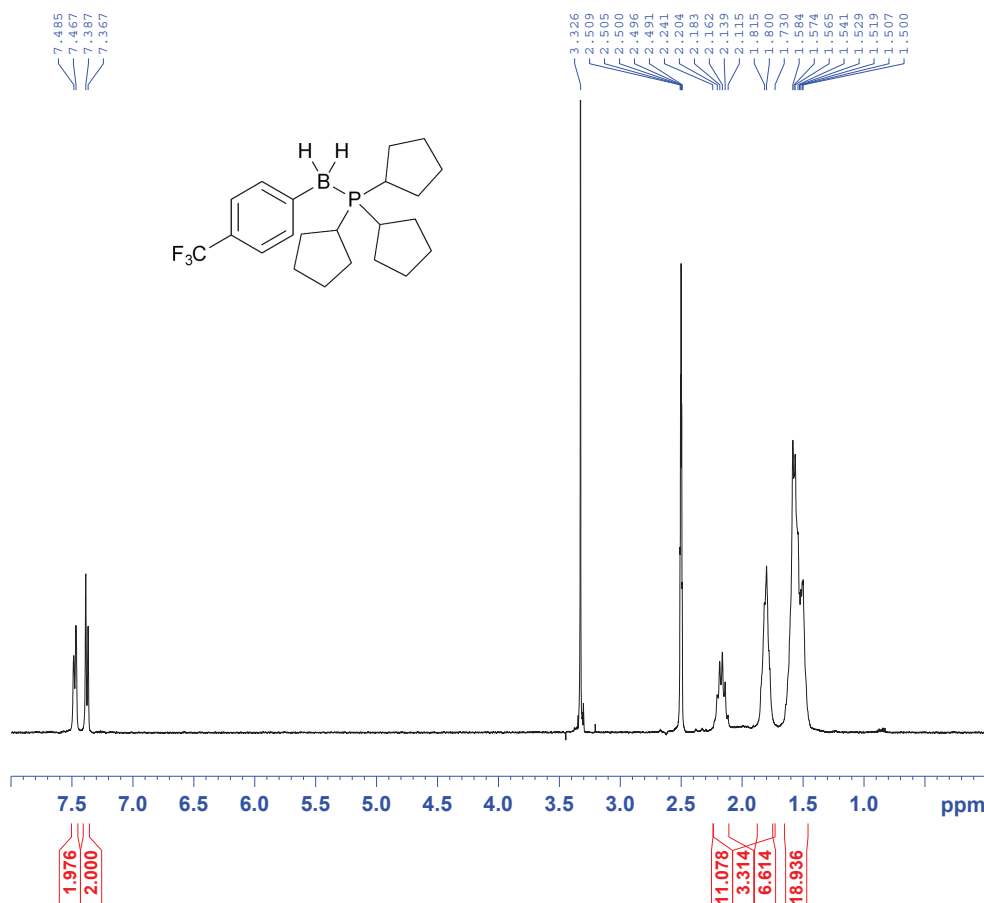4CF<sub>3</sub>PhBH<sub>2</sub>P(cyclopentyl)<sub>3</sub>

## IBB-nmr Analysis

NAME Mar08-2024  
 EXPNO 13  
 PROCNO 1  
 Date\_ 20240308  
 Time\_ 7.10  
 INSTRUM av500  
 PROBHD 5 mm CPDCH 13C  
 PULPROG zgpg30  
 TD 65536  
 SOLVENT CDCl3  
 NS 512  
 DS 4  
 SWH 30030.029 Hz  
 FIDRES 0.458222 Hz  
 AQ 1.0912410 sec  
 RG 35.9  
 DW 16.650 usec  
 DE 20.00 usec  
 TE 298.1 K  
 D1 2.00000000 sec  
 D11 0.03000000 sec  
 TD0 1

===== CHANNEL f1 =====  
 NUC1 13C  
 P1 10.00 usec  
 PL1 -5.00 dB  
 PL1W 14.29790783 W  
 SFO1 125.7703643 MHz

===== CHANNEL f2 =====  
 CPDPRG2 waltz16  
 NUC2 1H  
 PCPD2 80.00 usec  
 PL2 -4.00 dB  
 PL12 14.06 dB  
 PL13 17.00 dB  
 PL2W 6.30857365 W  
 PL12W 0.09862794 W  
 PL13W 0.05011872 W  
 SFO2 500.1320005 MHz  
 SI 32768  
 SF 125.7577928 MHz  
 WDW EM  
 SSB 0  
 LB 1.00 Hz  
 GB 0  
 PC 0.30

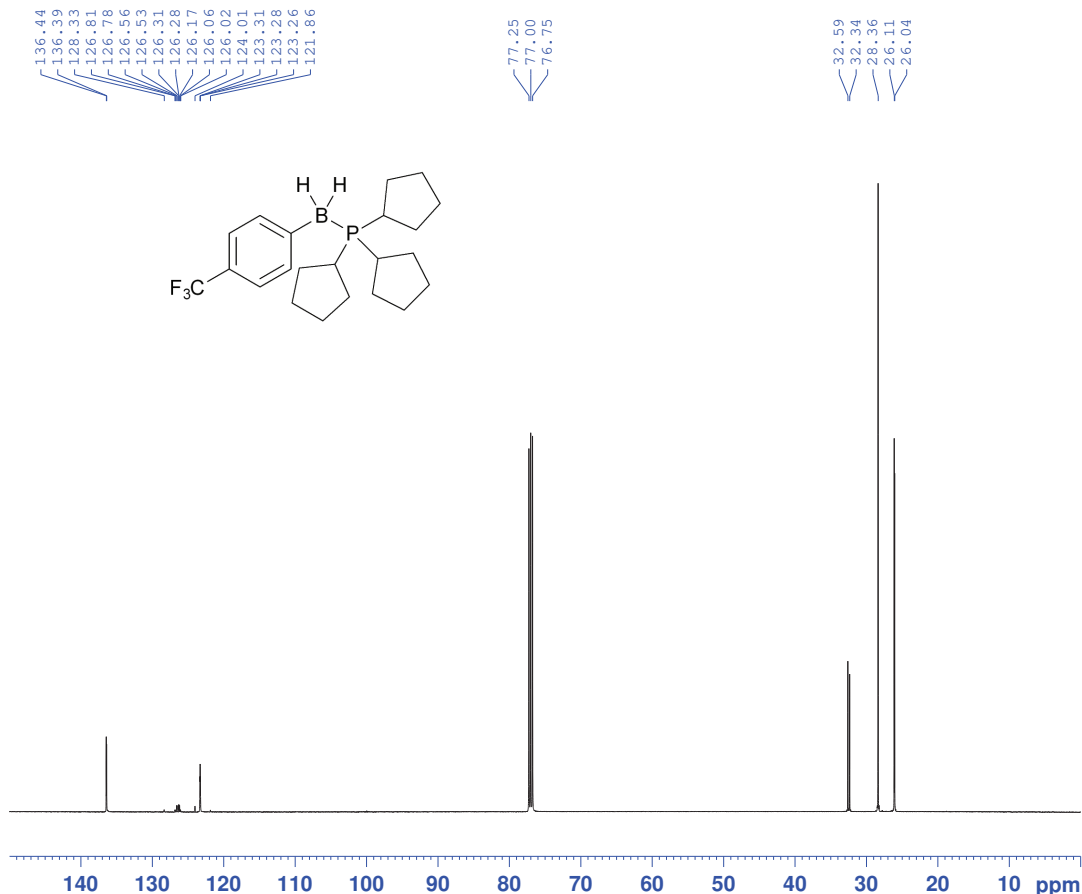

## 4CF3PhBH2P (cyclopentyl) 3

## IBB-nmr Analysis

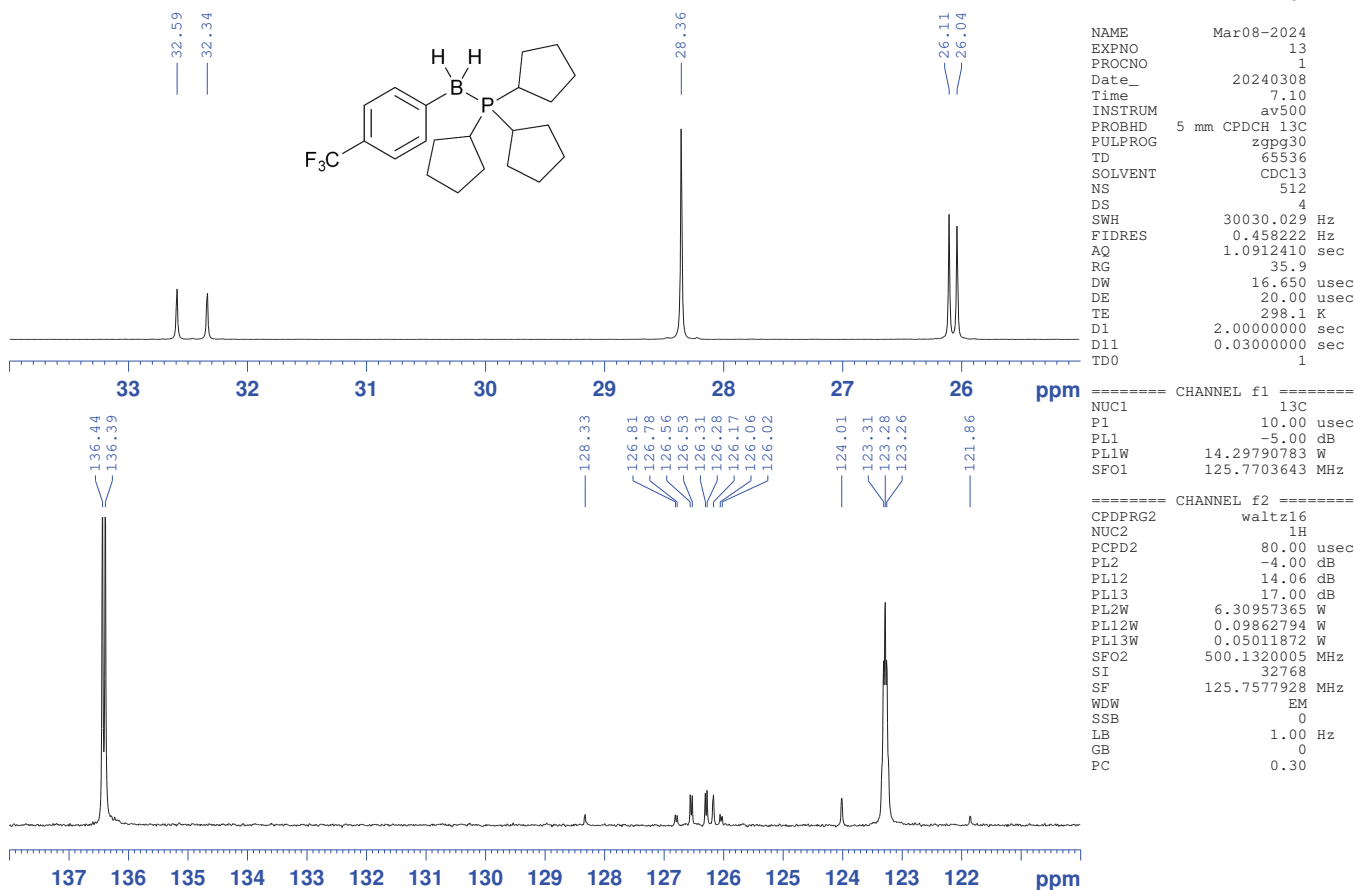

## 4-CF3PhBH2P (cyclopentyl) 3

## IBB-nmr Analysis

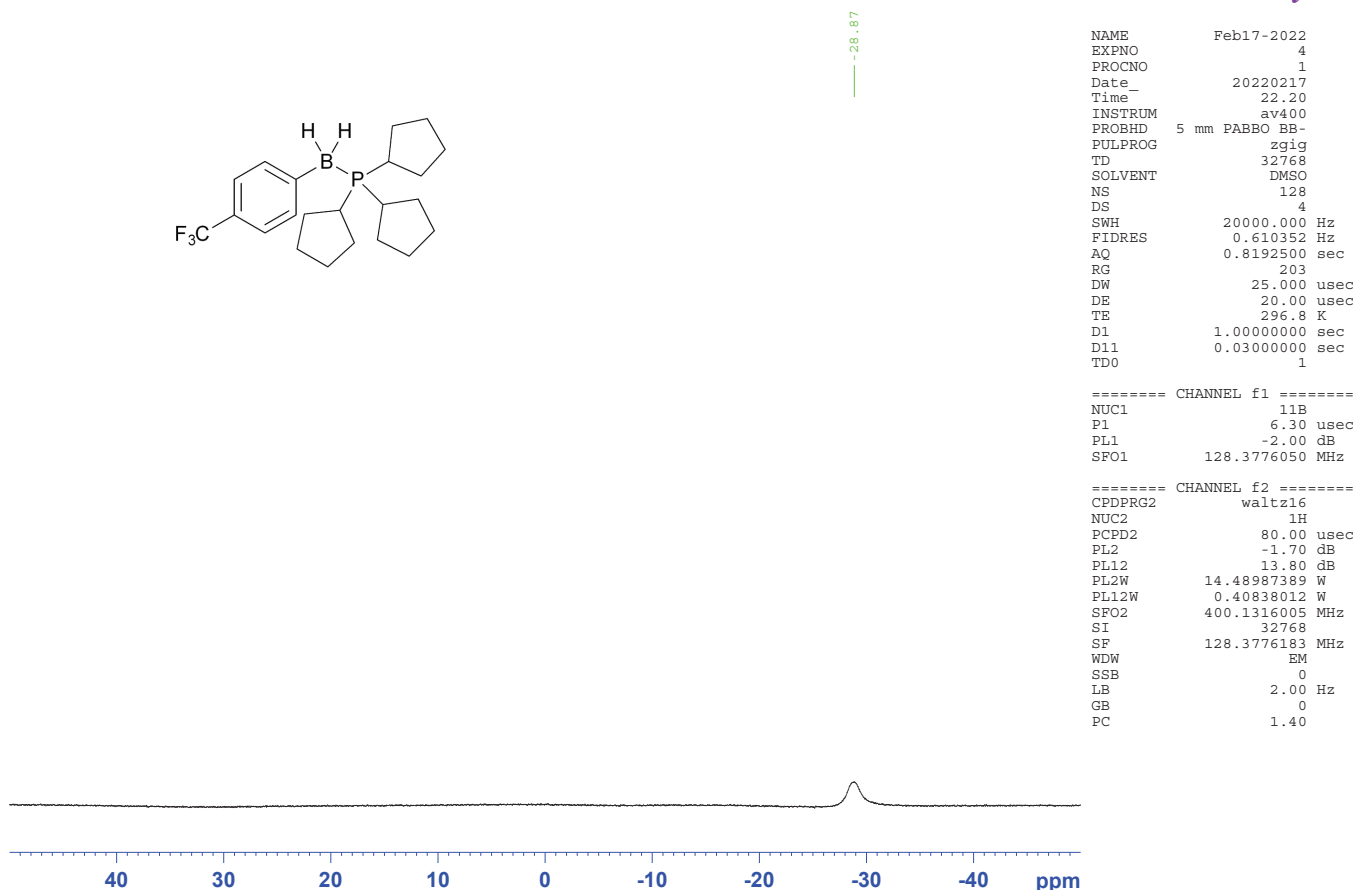

4-CF<sub>3</sub>PhBH<sub>2</sub>P(cyclopentyl)<sub>3</sub>

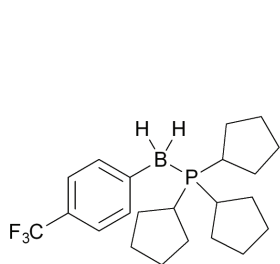

-60.58  
-60.58  
-60.59

## IBB-nmr Analysis

```
NAME      Feb17-2022
EXPNO     5
PROCNO    1
Date_     20220217
Time      22.23
INSTRUM   av400
PROBHD    5 mm PABBO BB-
PULPROG   zgfhigqn
TD        131072
SOLVENT   DMSO
NS         8
DS         4
SWH        89285.711 Hz
FIDRES     0.681196 Hz
AQ         0.7340532 sec
RG         203
DW         5.600 usec
DE         6.50 usec
TE         296.4 K
D1         1.00000000 sec
D11        0.03000000 sec
D12        0.00002000 sec
TD0        1
```

```
===== CHANNEL f1 =====
NUC1       19F
P1         19.50 usec
PL1        -4.00 dB
PL1W       16.40489006 W
SFO1       376.4607164 MHz
```

```
===== CHANNEL f2 =====
CPDPRG2    waltz16
NUC2        1H
PCPD2      112.00 usec
PL2         -4.00 dB
PL12        18.00 dB
PL2W       24.60733604 W
PL12W      0.15526180 W
SFO2       400.1316005 MHz
SI          65536
SF         376.4984617 MHz
WDW         EM
SSB         0
LB          0.30 Hz
GB          0
PC          1.00
```

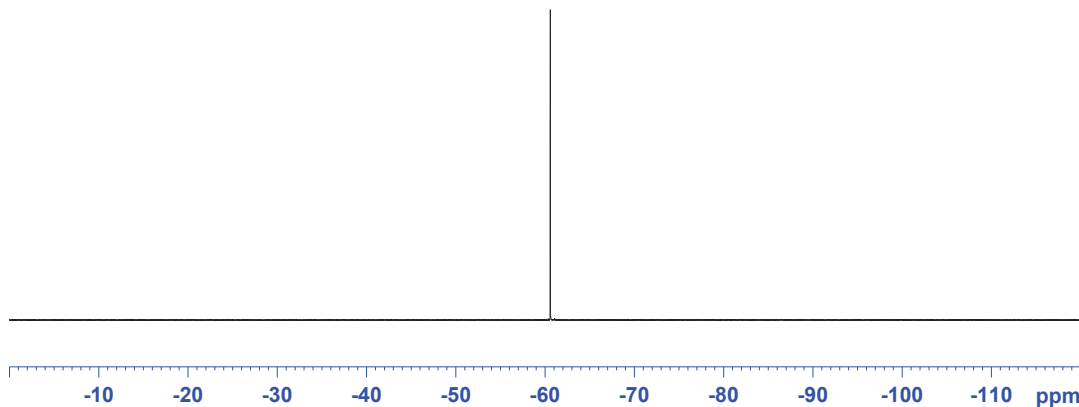

4-CF<sub>3</sub>PhBH<sub>2</sub>P(cyclopentyl)<sub>3</sub>

19.39

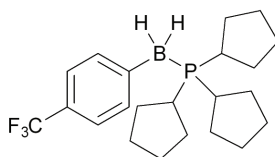

## IBB-nmr Analysis

```
NAME      Feb17-2022
EXPNO     3
PROCNO    1
Date_     20220217
Time      22.12
INSTRUM   av400
PROBHD    5 mm PABBO BB-
PULPROG   zg30
TD        65536
SOLVENT   DMSO
NS         8
DS         4
SWH        64102.563 Hz
FIDRES     0.978127 Hz
AQ         0.5112308 sec
RG         203
DW         7.800 usec
DE         6.50 usec
TE         296.3 K
D1         2.00000000 sec
TD0        1
```

```
===== CHANNEL f1 =====
NUC1       31P
P1         10.00 usec
PL1        -0.70 dB
PL1W       30.10233498 W
SFO1       161.9674942 MHz
SI         32768
SF         161.9754962 MHz
WDW         EM
SSB         0
LB          1.00 Hz
GB          0
PC          1.40
```

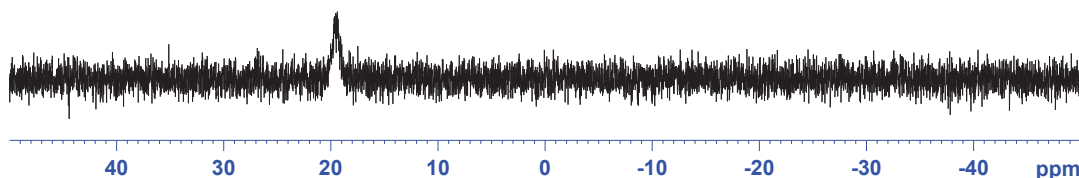

B-4-(Trifluoromethyl)phenyl tricyclohexylphosphine–borane (37)

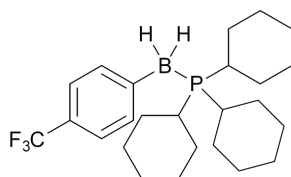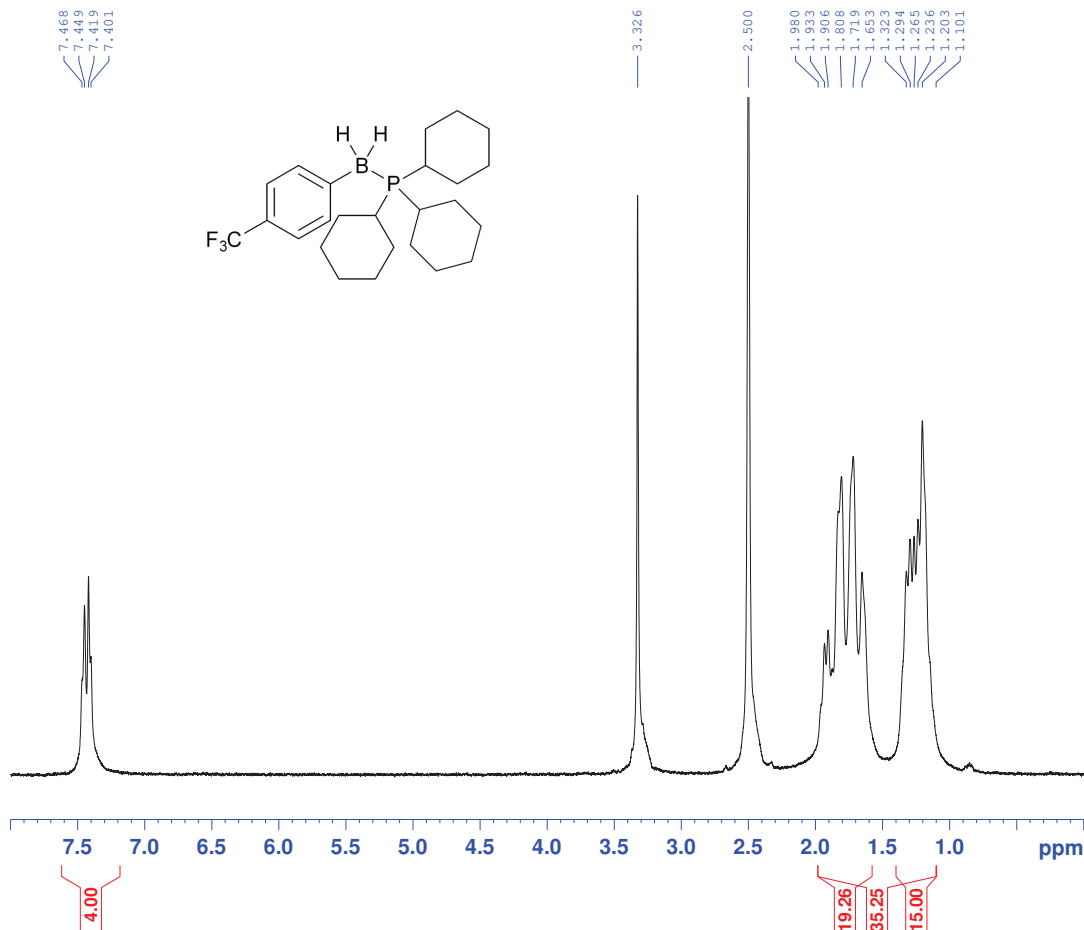

|         |                |
|---------|----------------|
| NAME    | Apr07-2022     |
| EXPNO   | 10             |
| PROCNO  | 1              |
| Date_   | 20220407       |
| Time    | 23.20          |
| INSTRUM | av400          |
| PULPROG | 5 mm PABBO BB- |
| TD      | zg30           |
| SOLVENT | 65536          |
| NS      | DMSO           |
| DS      | 16             |
| SWH     | 2              |
| FIDRES  | 8223.685 Hz    |
| AQ      | 0.125483 Hz    |
| RG      | 3.9846387 sec  |
| DW      | 203            |
| DE      | 60.800 usec    |
| TE      | 6.50 usec      |
| D1      | 296.1 K        |
| TD0     | 1.00000000 sec |
|         | 1              |

```

===== CHANNEL f1 =====
NUC1                      1H
P1                        14.00 usec
PL                        -1.80 dB
PL1W                      14.82738590 W
SFO1                      400.1324710 MHz
SI                        32768
SF                        400.1300035 MHz
WDW                        EM
SSB                        0
LB                        0.30 Hz
GB                        0
PC                        1.00

```

| Country        | Population (millions) |
|----------------|-----------------------|
| Japan          | 136.82                |
| France         | 136.77                |
| Germany        | 128.79                |
| Italy          | 126.64                |
| Spain          | 125.79                |
| United Kingdom | 125.76                |
| Sweden         | 125.55                |
| Canada         | 125.52                |
| United States  | 125.30                |
| China          | 125.27                |
| India          | 125.05                |
| South Korea    | 125.02                |
| Brazil         | 124.46                |
| Russia         | 123.59                |
| South Africa   | 122.30                |

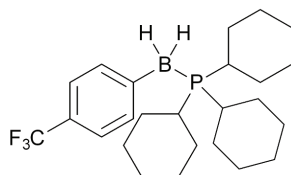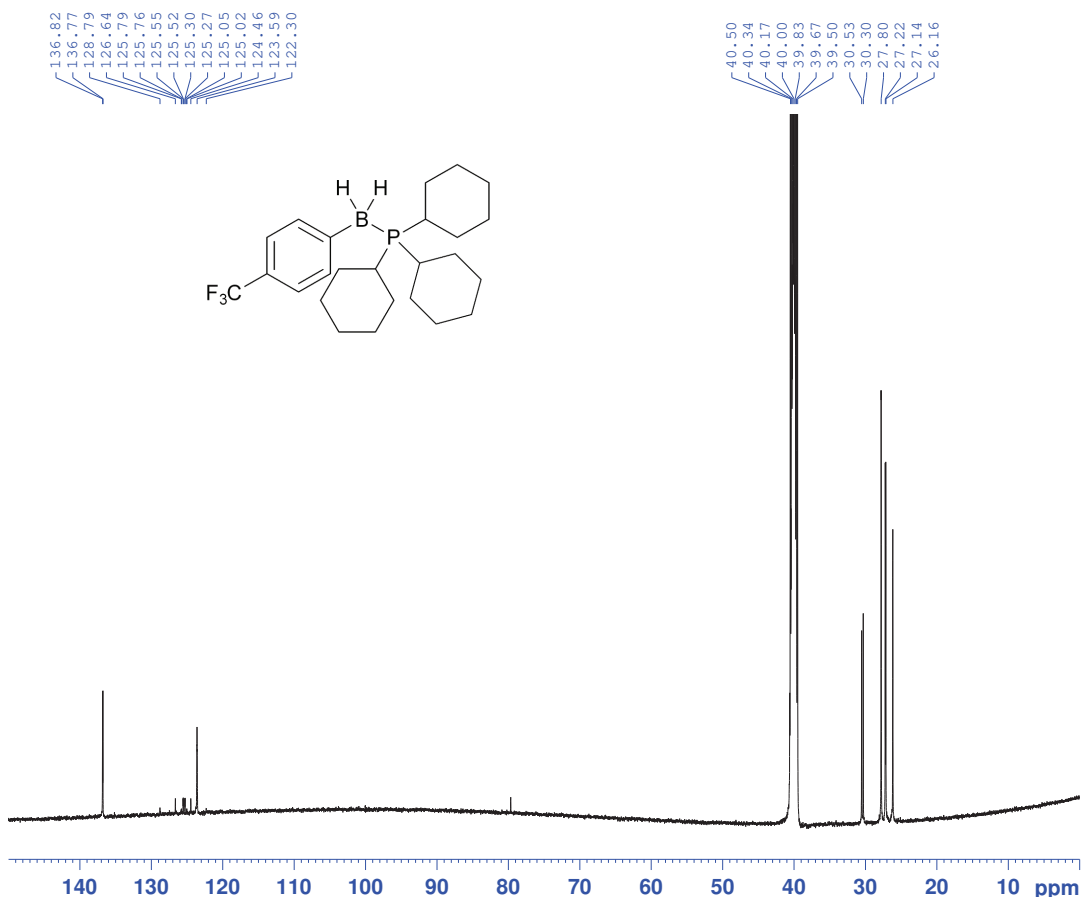

|         |            |       |     |
|---------|------------|-------|-----|
| NAME    | Mar06-2024 |       |     |
| EXPNO   | 9          |       |     |
| PROCNO  | 1          |       |     |
| Date_   | 20240306   |       |     |
| Time    | 5.01       |       |     |
| INSTRUM | av500      |       |     |
| PROBHD  | 5 mm       | CPDCH | 13C |
| PULPROG | zgpg30     |       |     |
| TD      | 65536      |       |     |
| SOLVENT | DMSO       |       |     |
| NS      | 2048       |       |     |
| DS      | 4          |       |     |
| SWH     | 30030.029  | Hz    |     |
| FIDRES  | 0.458222   | Hz    |     |
| AQ      | 1.0912410  | sec   |     |
| RG      | 57         |       |     |
| DW      | 16.650     | usec  |     |
| DE      | 20.00      | usec  |     |
| TE      | 297.9      | K     |     |
| D1      | 2.00000000 | sec   |     |
| D11     | 0.03000000 | sec   |     |
| TD0     | 1          |       |     |

```
===== CHANNEL f1 =====
NUC1                13C
P1                  10.00 usec
PL1                 -5.00 dB
PL1W                14.29790783 W
SFO1                125.7703643 MHz
```

```

===== CHANNEL f2 =====
CPDRPG2          waitz16
NUC2              1H
PL2              80.00      usec
PL2              -4.00      dB
PL12             14.06      dB
PL13             17.00      dB
PL2W             6.30957365 W
PL12W            0.09862794 W
PL13W            0.05011872 W
SF02             500.1320005 MHz
SI               32768
SF              125.7577867 MHz
WDW              EM
SSB              0
LB               1.00      Hz
GB               0
PC               0.30

```

4CF3PhBH2P (cyclohexyl) 3

## IBB-nmr Analysis

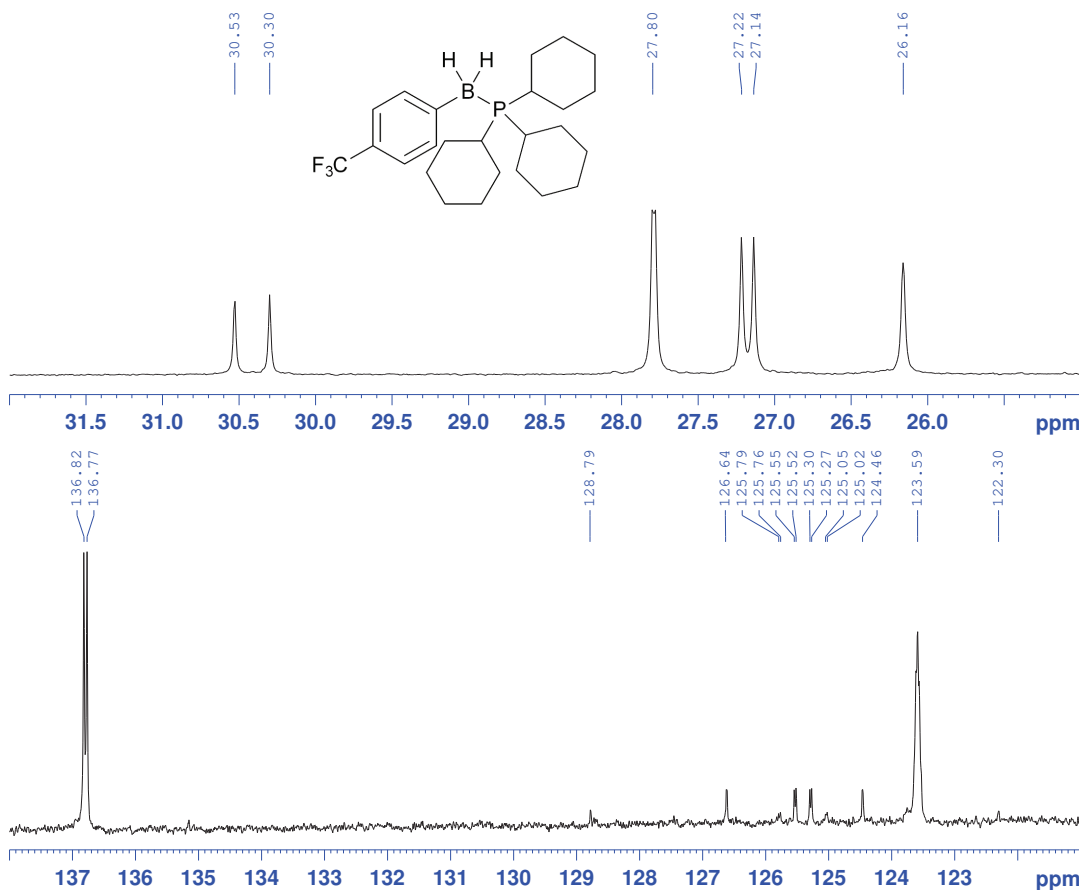

NAME Mar06-2024  
 EXPNO 9  
 PROCNO 1  
 Date\_ 20240306  
 Time 5.01  
 INSTRUM av500  
 PROBHD 5 mm CPDCH 13C  
 PULPROG zgpg30  
 TD 65536  
 SOLVENT DMSO  
 NS 2048  
 DS 4  
 SWH 30030.029 Hz  
 FIDRES 0.458222 Hz  
 AQ 1.0912410 sec  
 RG 57  
 DW 16.650 usec  
 DE 20.00 usec  
 TE 297.9 K  
 D1 2.00000000 sec  
 D11 0.03000000 sec  
 TD0 1

===== CHANNEL f1 =====  
 NUC1 13C  
 P1 10.00 usec  
 PL1 -5.00 dB  
 PL1W 14.29790783 W  
 SFO1 125.7703643 MHz

===== CHANNEL f2 =====  
 CPDPRG2 waltz16  
 NUC2 1H  
 PCPD2 80.00 usec  
 PL2 -4.00 dB  
 PL12 14.06 dB  
 PL13 17.00 dB  
 PL2W 6.30957365 W  
 PL12W 0.09862794 W  
 PL13W 0.05011872 W  
 SFO2 500.1320005 MHz  
 SI 32768  
 SF 125.7577867 MHz  
 WDW EM  
 SSB 0  
 LB 1.00 Hz  
 GB 0  
 PC 0.30

4CF3PhBH2P (cyclohexyl) 3

## IBB-nmr Analysis

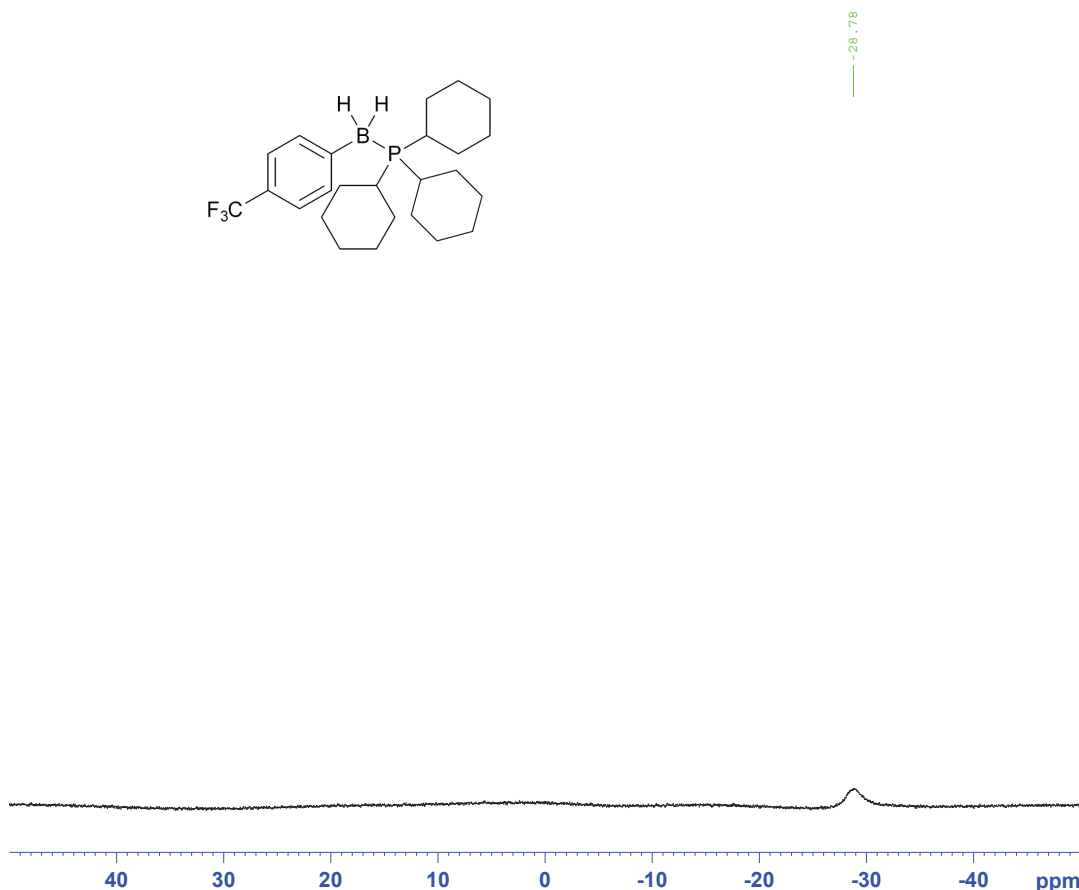

NAME Mar27-2022  
 EXPNO 5  
 PROCNO 1  
 Date\_ 20220327  
 Time 22.54  
 INSTRUM av400  
 PROBHD 5 mm PABBO BB-  
 PULPROG zgig  
 TD 32768  
 SOLVENT DMSO  
 NS 128  
 DS 4  
 SWH 20000.000 Hz  
 FIDRES 0.610352 Hz  
 AQ 0.8192500 sec  
 RG 203  
 DW 25.000 usec  
 DE 20.00 usec  
 TE 296.1 K  
 D1 1.00000000 sec  
 D11 0.03000000 sec  
 TD0 1

===== CHANNEL f1 =====  
 NUC1 11B  
 P1 6.30 usec  
 PL1 -2.00 dB  
 SFO1 128.3776050 MHz

===== CHANNEL f2 =====  
 CPDPRG2 waltz16  
 NUC2 1H  
 PCPD2 80.00 usec  
 PL2 -1.70 dB  
 PL12 13.80 dB  
 PL2W 14.48987389 W  
 PL12W 0.40838012 W  
 SFO2 400.1316005 MHz  
 SI 32768  
 SF 128.3776183 MHz  
 WDW EM  
 SSB 0  
 LB 2.00 Hz  
 GB 0  
 PC 1.40



4CF3PhBH2P(cyclohexyl)3

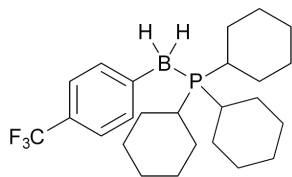

-60.56  
-60.56

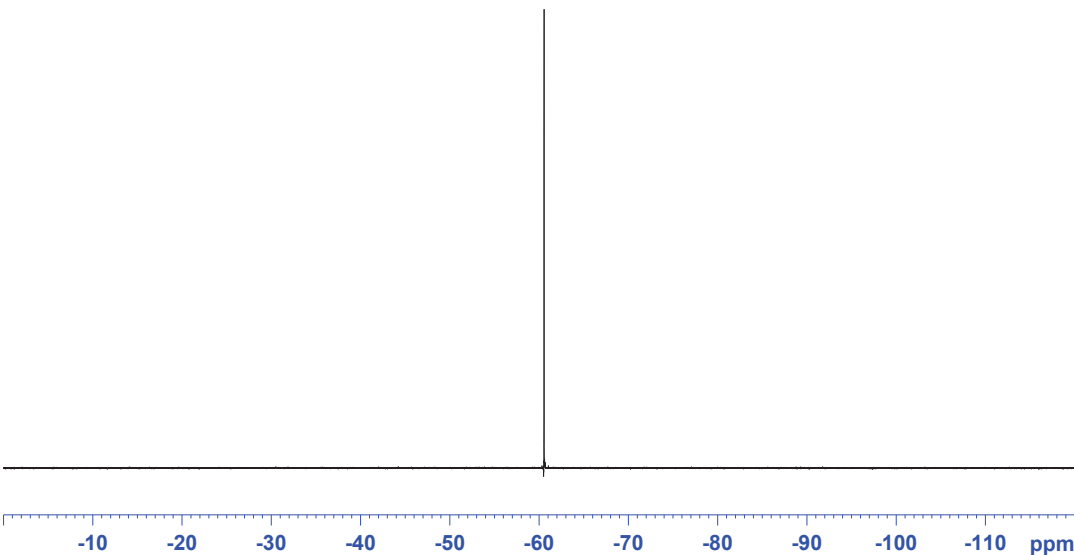

## IBB-nmr Analysis

```

NAME      Mar27-2022
EXPNO     3
PROCNO    1
Date_     20220327
Time      22.42
INSTRUM   av400
PROBHD    5 mm PABBO BB-
PULPROG   zgfhigqn
TD         131072
SOLVENT   DMSO
NS         8
DS         4
SWH        89285.711 Hz
FIDRES     0.681196 Hz
AQ         0.7340532 sec
RG         203
DW         5.600 usec
DE         6.50 usec
TE         295.6 K
D1         1.00000000 sec
D11        0.03000000 sec
D12        0.00002000 sec
TD0        1
  
```

```

===== CHANNEL f1 =====
NUC1      19F
P1        19.50 usec
PL1       -4.00 dB
PL1W      16.40489006 W
SFO1      376.4607164 MHz
  
```

```

===== CHANNEL f2 =====
CPDPRG2   waltz16
NUC2       1H
PCPD2     112.00 usec
PL2       -4.00 dB
PL12      18.00 dB
PL2W      24.60733604 W
PL12W     0.15526180 W
SFO2      400.1316005 MHz
SI         65536
SF         376.4984617 MHz
WDW        EM
SSB        0
LB         0.30 Hz
GB         0
PC         1.00
  
```

4CF3PhBH2P(cyclohexyl)3

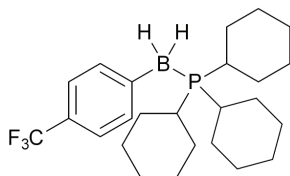

16.20

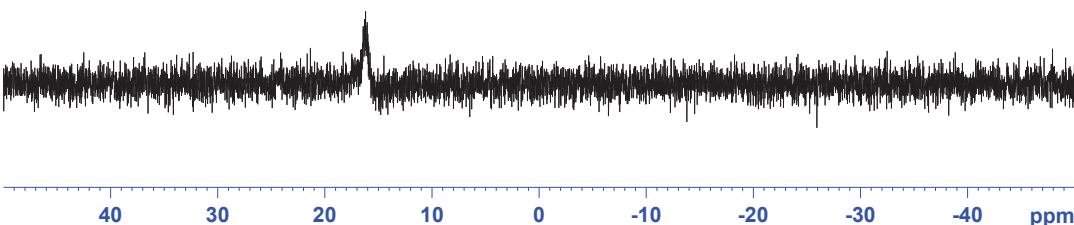

## IBB-nmr Analysis

```

NAME      Mar27-2022
EXPNO     4
PROCNO    1
Date_     20220327
Time      22.46
INSTRUM   av400
PROBHD    5 mm PABBO BB-
PULPROG   zg30
TD         65536
SOLVENT   DMSO
NS         16
DS         4
SWH        64102.563 Hz
FIDRES     0.978127 Hz
AQ         0.5112308 sec
RG         203
DW         7.800 usec
DE         6.50 usec
TE         295.5 K
D1         2.00000000 sec
TD0        1
  
```

```

===== CHANNEL f1 =====
NUC1      31P
P1        10.00 usec
PL1       -0.70 dB
PL1W      30.10233498 W
SFO1      161.9674942 MHz
SI         32768
SF         161.9754962 MHz
WDW        EM
SSB        0
LB         1.00 Hz
GB         0
PC         1.40
  
```

## B-4-(Trifluoromethyl)phenyl dicyclohexylphosphine–borane (38)

### IBB-nmr Analysis

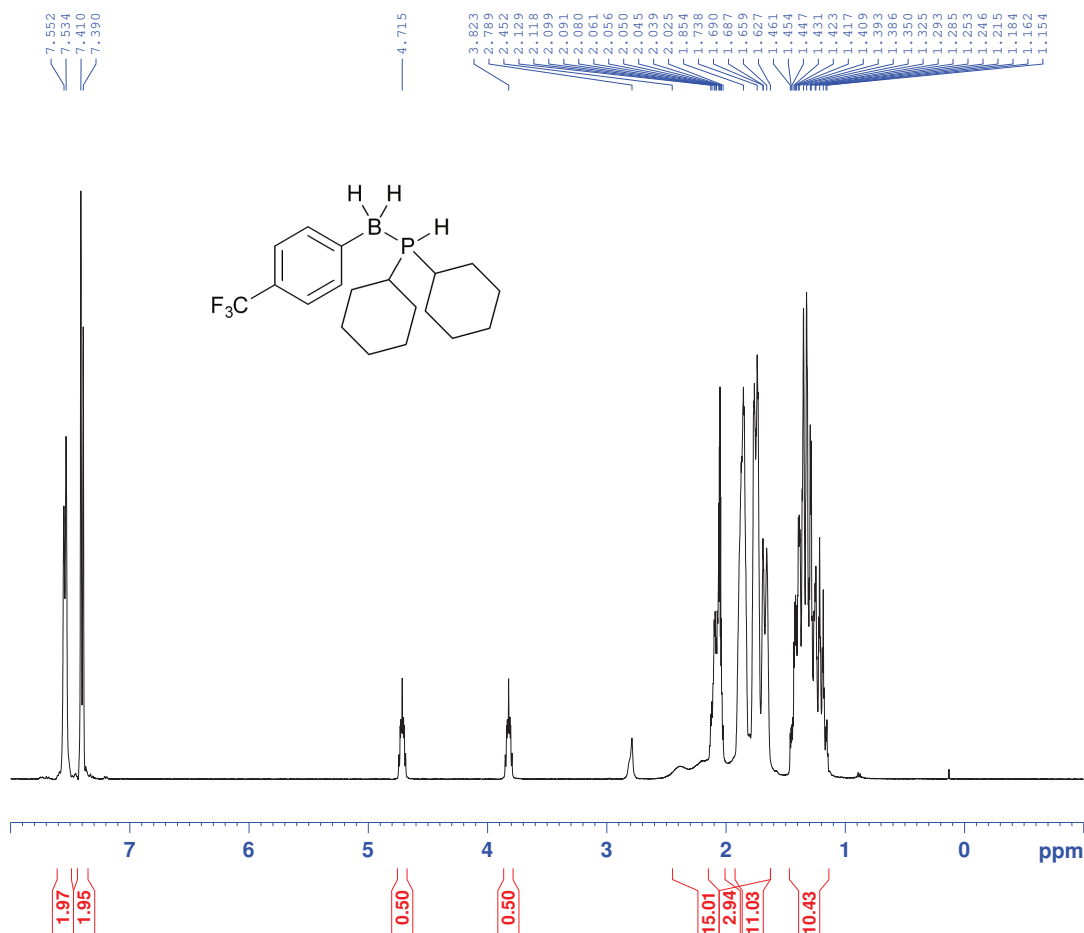

|         |                |
|---------|----------------|
| NAME    | Aug8-2023      |
| EXPNO   | 1              |
| PROCNO  | 1              |
| Date_   | 20230808       |
| Time    | 8.22           |
| INSTRUM | av400          |
| PULPROG | zgpg30         |
| TD      | 65536          |
| SOLVENT | Acetone        |
| NS      | 4              |
| DS      | 2              |
| SWH     | 8223.685 Hz    |
| FIDRES  | 0.125483 Hz    |
| AQ      | 3.9846387 sec  |
| RG      | 57             |
| DW      | 60.800 usec    |
| DE      | 6.50 usec      |
| TE      | 297.4 K        |
| D1      | 1.00000000 sec |
| TD0     | 1              |

```

===== CHANNEL f1 =====
NUC1                1H
P1                  14.00 usec
PL                  -1.80 dB
PL1W                14.82738590 W
SFO1                400.1324710 MHz
SI                  32768
SF                  400.1300067 MHz
WDW                  EM
SSB                  0
LB                   0.30 Hz
GB                   0
PC                   1.00

```

4CF<sub>3</sub>PhBH<sub>2</sub>PH(cyclohexyl)<sub>2</sub>

### IBB-nmr Analysis

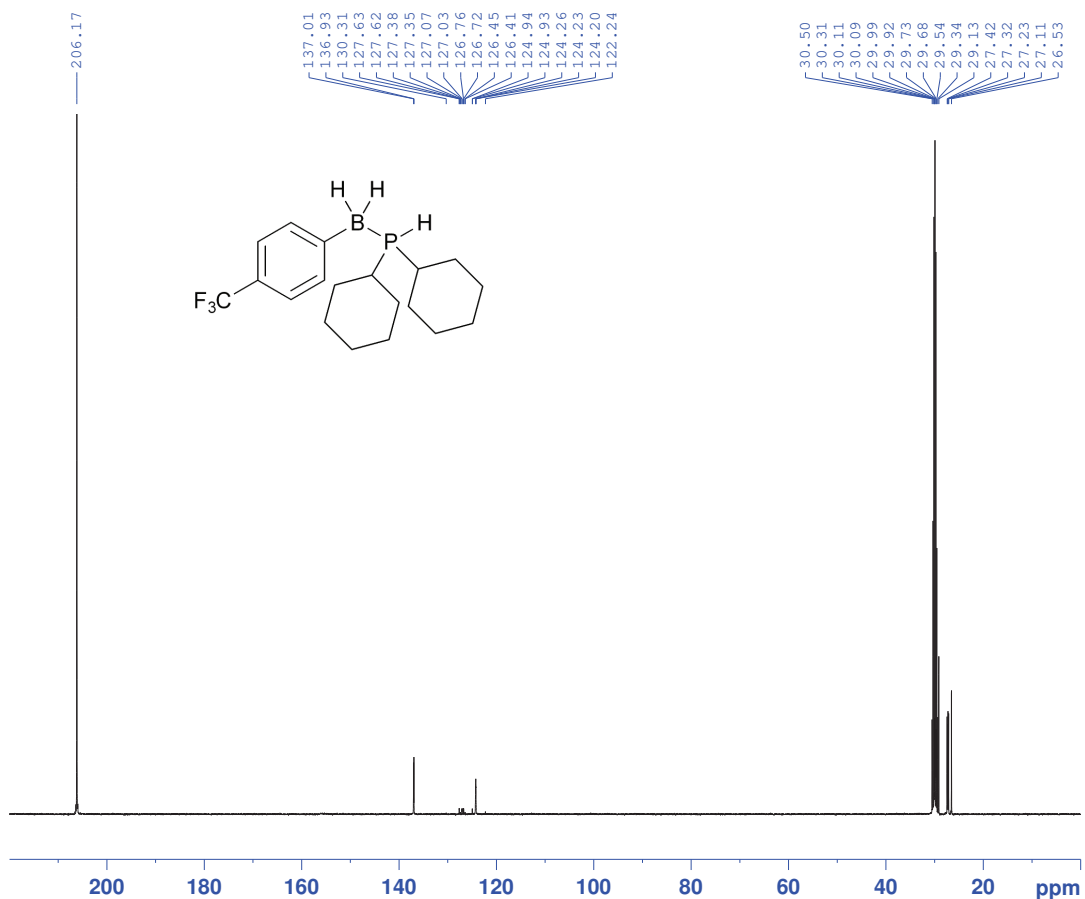

|         |            |           |      |
|---------|------------|-----------|------|
| NAME    | Aug8-2023  |           |      |
| EXPNO   | 2          |           |      |
| PROCNO  | 1          |           |      |
| Date_   | 20230808   |           |      |
| Time    | 9.27       |           |      |
| INSTRUM | av400      |           |      |
| PROBHD  | 5 mm       | PABBO BB- |      |
| PULPROG | zgpg30     |           |      |
| TD      | 65536      |           |      |
| SOLVENT | Acetone    |           |      |
| NS      | 1024       |           |      |
| DS      | 2          |           |      |
| SWH     | 24038.461  | Hz        |      |
| FIDRES  | 0.366798   | Hz        |      |
| AQ      | 1.3631988  |           | sec  |
| RG      | 128        |           |      |
| DW      | 20.800     |           | usec |
| DE      | 6.50       |           | usec |
| TE      | 298.7      | K         |      |
| D1      | 2.00000000 |           | sec  |
| D11     | 0.03000000 |           | sec  |
| TD0     | 1          |           |      |

```
===== CHANNEL f1 =====
NUC1              13C
P1                9.00 usec
PL1              -3.00 dB
PL1W             73.17333984 W
SFO1             100.6228298 Mhz
```

```

===== CHANNEL f2 =====
CPDRPG2          waltz16
NUG2              1H
PCFD2            80.00 usec
FL2              -1.70 dB
PL12             13.80 dB
PL13             13.80 dB
PL2W             14.48987389 W
PL12W            0.40838012 W
PL13W            0.40838012 W
SF02             400.1316005 MHz
SI               32768
SF              100.6126702 MHz
WDW              EM
SSB              0
LB               1.00 Hz
GB               0
PC               0.30

```

4CF3PhBH2PH(cyclohexyl)2

## IBB-nmr Analysis

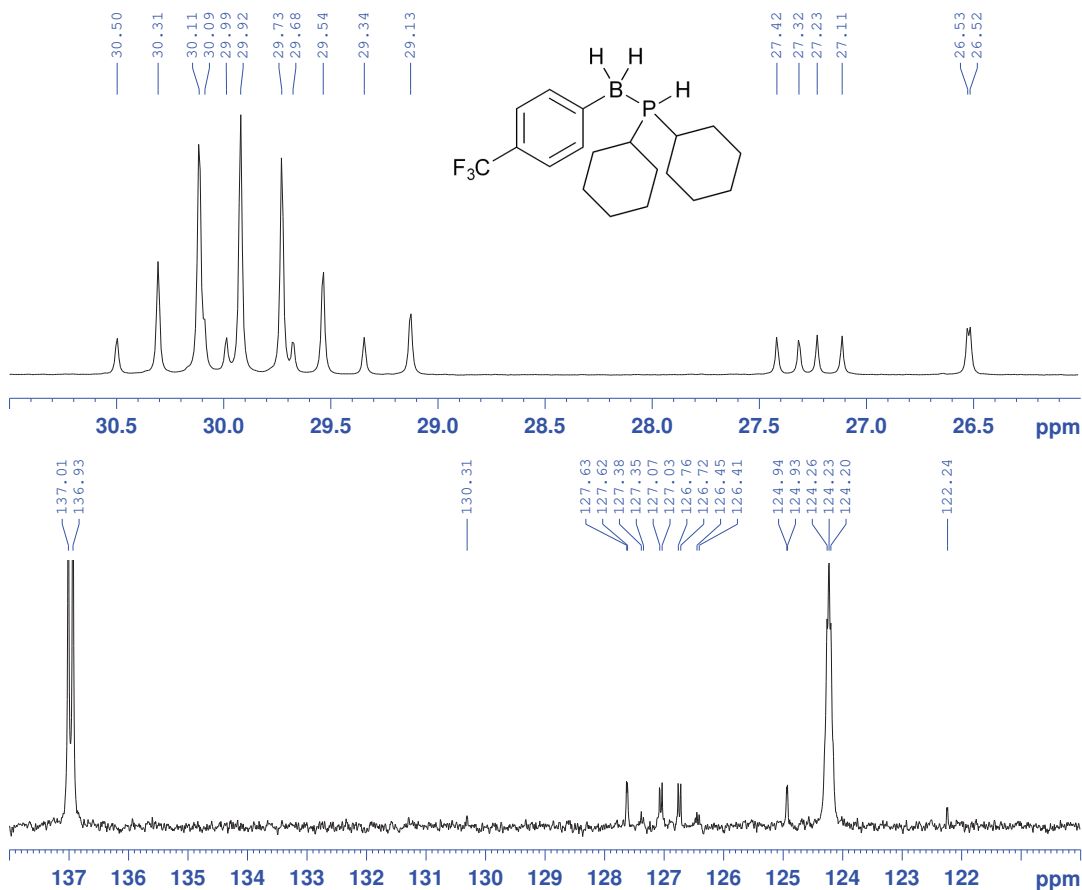

NAME Aug8-2023  
 EXPNO 2  
 PROCNO 1  
 Date\_ 20230808  
 Time 9.27  
 INSTRUM av400  
 PROBHD 5 mm PABBO BB-  
 PULPROG zgpg30  
 TD 65536  
 SOLVENT Acetone  
 NS 1024  
 DS 2  
 SWH 24038.461 Hz  
 FIDRES 0.366798 Hz  
 AQ 1.3631988 sec  
 RG 128  
 DW 20.800 usec  
 DE 6.50 usec  
 TE 298.7 K  
 D1 2.00000000 sec  
 D11 0.03000000 sec  
 TD0 1

===== CHANNEL f1 =====  
 NUC1 13C  
 P1 9.00 usec  
 PL1 -3.00 dB  
 PL1W 73.17333984 W  
 SFO1 100.6228298 MHz

===== CHANNEL f2 =====  
 CPDPRG2 waltz16  
 NUC2 1H  
 PCPD2 80.00 usec  
 PL2 -1.70 dB  
 PL12 13.80 dB  
 PL13 13.80 dB  
 PL2W 14.48987389 W  
 PL12W 0.40838012 W  
 PL13W 0.40838012 W  
 SFO2 400.1316005 MHz  
 SI 32768  
 SF 100.6126702 MHz  
 WDW EM  
 SSB 0  
 LB 1.00 Hz  
 GB 0  
 PC 0.30

4CF3PhBH2PH(cyclohexyl)2

## IBB-nmr Analysis

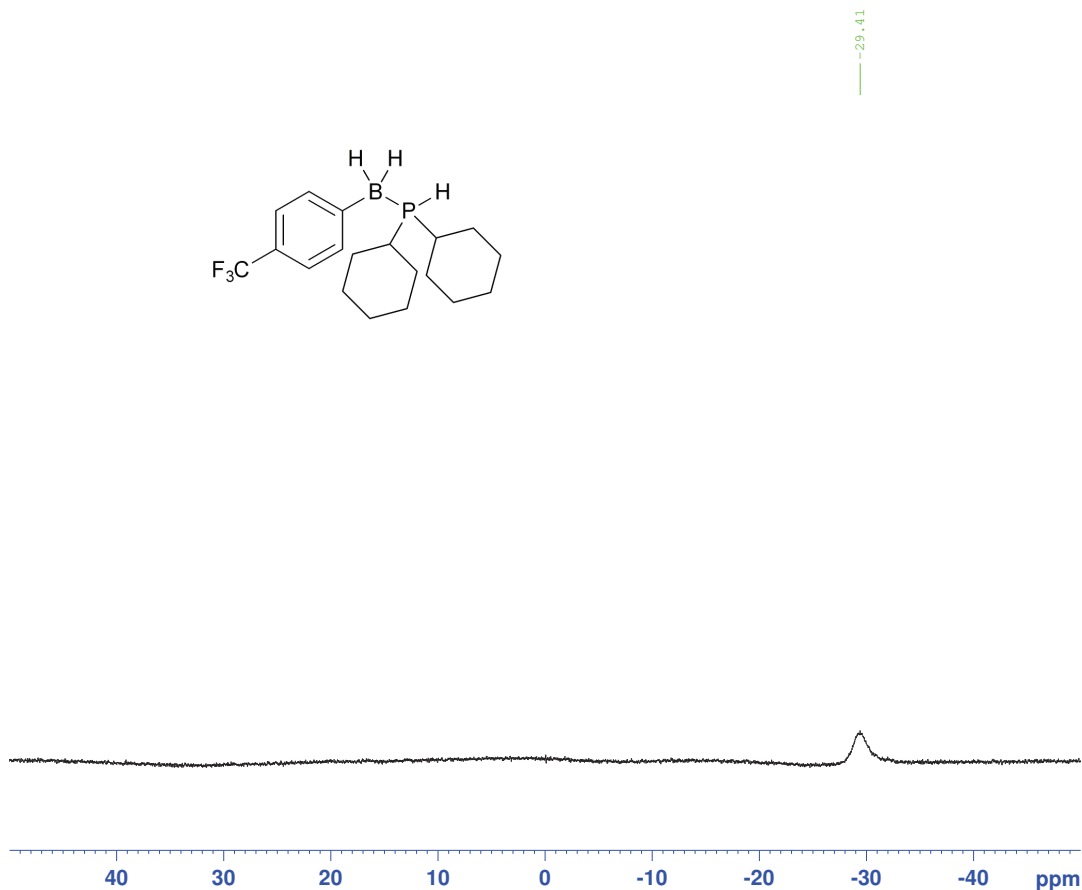

NAME Jul22-2023  
 EXPNO 5  
 PROCNO 1  
 Date\_ 20230722  
 Time 16.33  
 INSTRUM av400  
 PROBHD 5 mm PABBO BB-  
 PULPROG zgig  
 TD 32768  
 SOLVENT DMSO  
 NS 128  
 DS 4  
 SWH 20000.000 Hz  
 FIDRES 0.610352 Hz  
 AQ 0.8192500 sec  
 RG 203  
 DW 25.000 usec  
 DE 20.00 usec  
 TE 297.5 K  
 D1 1.00000000 sec  
 D11 0.03000000 sec  
 TD0 1

===== CHANNEL f1 =====  
 NUC1 11B  
 P1 6.30 usec  
 PL1 -2.00 dB  
 SFO1 128.3776050 MHz

===== CHANNEL f2 =====  
 CPDPRG2 waltz16  
 NUC2 1H  
 PCPD2 80.00 usec  
 PL2 -1.70 dB  
 PL12 13.80 dB  
 PL2W 14.48987389 W  
 PL12W 0.40838012 W  
 SFO2 400.1316005 MHz  
 SI 32768  
 SF 128.3776183 MHz  
 WDW EM  
 SSB 0  
 LB 2.00 Hz  
 GB 0  
 PC 1.40

4-CF<sub>3</sub>PhBH<sub>2</sub>PH(cyclohexyl)<sub>2</sub>

## IBB-nmr Analysis

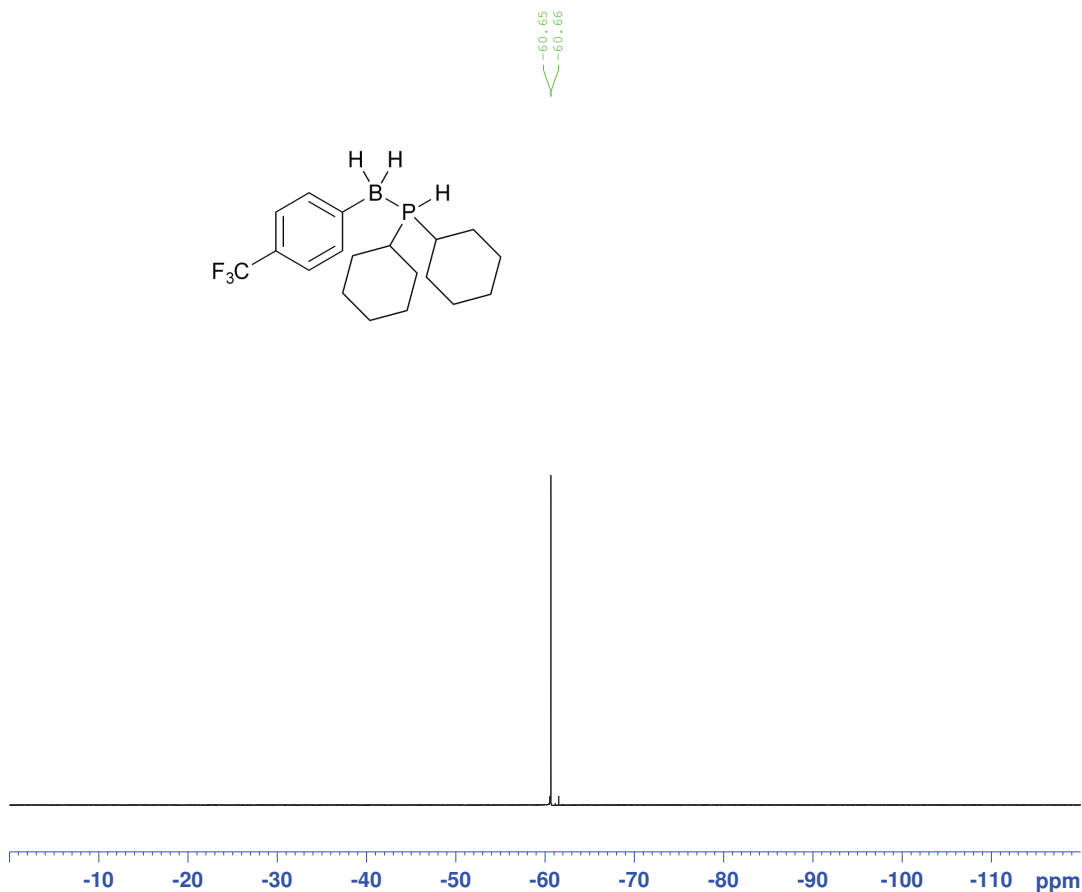

4CF<sub>3</sub>PhBH<sub>2</sub>PH(cyclohexyl)<sub>2</sub>

## IBB-nmr Analysis

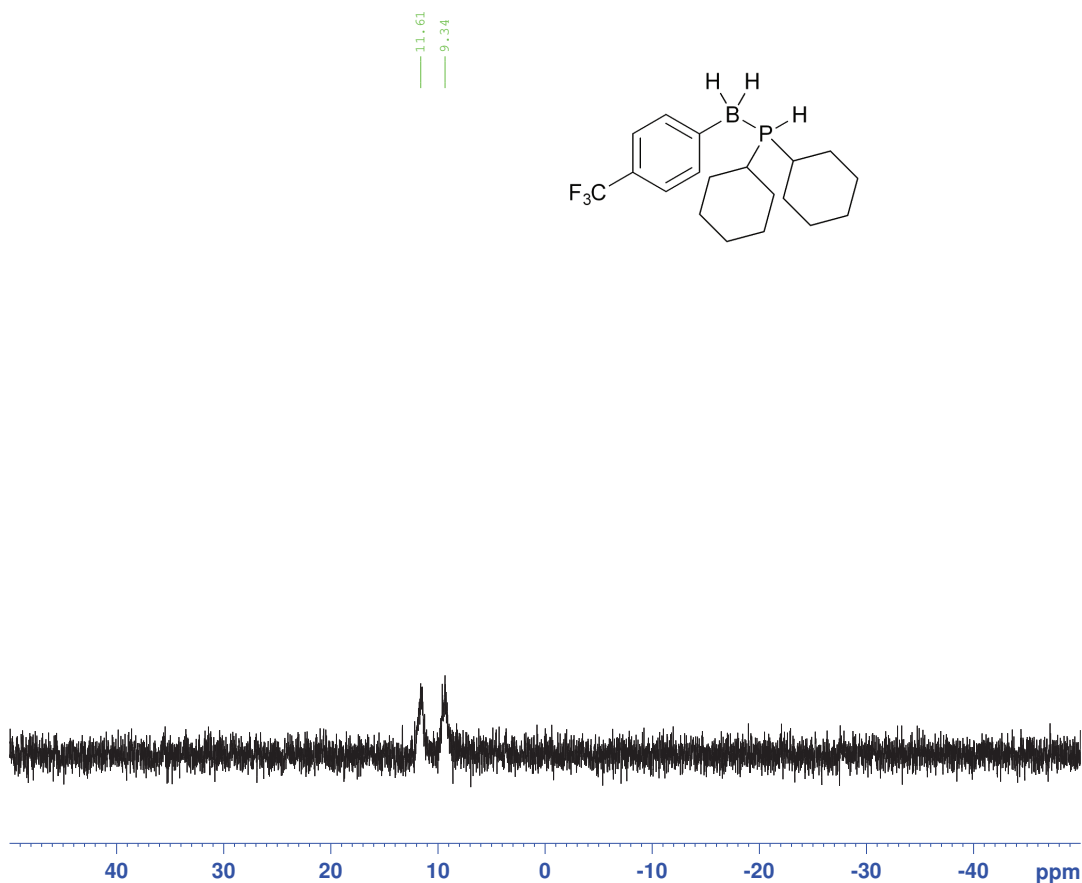

4CF<sub>3</sub>PhBH<sub>2</sub>P(NMe<sub>2</sub>)<sub>3</sub>

## B-4-(Trifluoromethyl)phenyl tris(dimethylamino)phosphine-borane (39)

## IBB-nmr Analysis

NAME July17-2022  
 EXPNO 1  
 PROCNO 1  
 Date\_ 20220717  
 Time 17.57  
 INSTRUM av400  
 PROBHD 5 mm PABBO BB-  
 PULPROG zg30  
 TD 65536  
 SOLVENT DMSO  
 NS 16  
 DS 2  
 SWH 8223.685 Hz  
 FIDRES 0.125483 Hz  
 AQ 3.9846387 sec  
 RG 203  
 DW 60.800 usec  
 DE 6.50 usec  
 TE 297.0 K  
 D1 1.00000000 sec  
 TD0 1

===== CHANNEL f1 =====  
 NUC1 1H  
 P1 14.00 usec  
 PL1 -1.80 dB  
 PL1W 14.82738590 W  
 SFO1 400.1324710 MHz  
 SI 32768  
 SF 400.1300036 MHz  
 WDW EM  
 SSB 0  
 LB 0.30 Hz  
 GB 0  
 PC 1.00

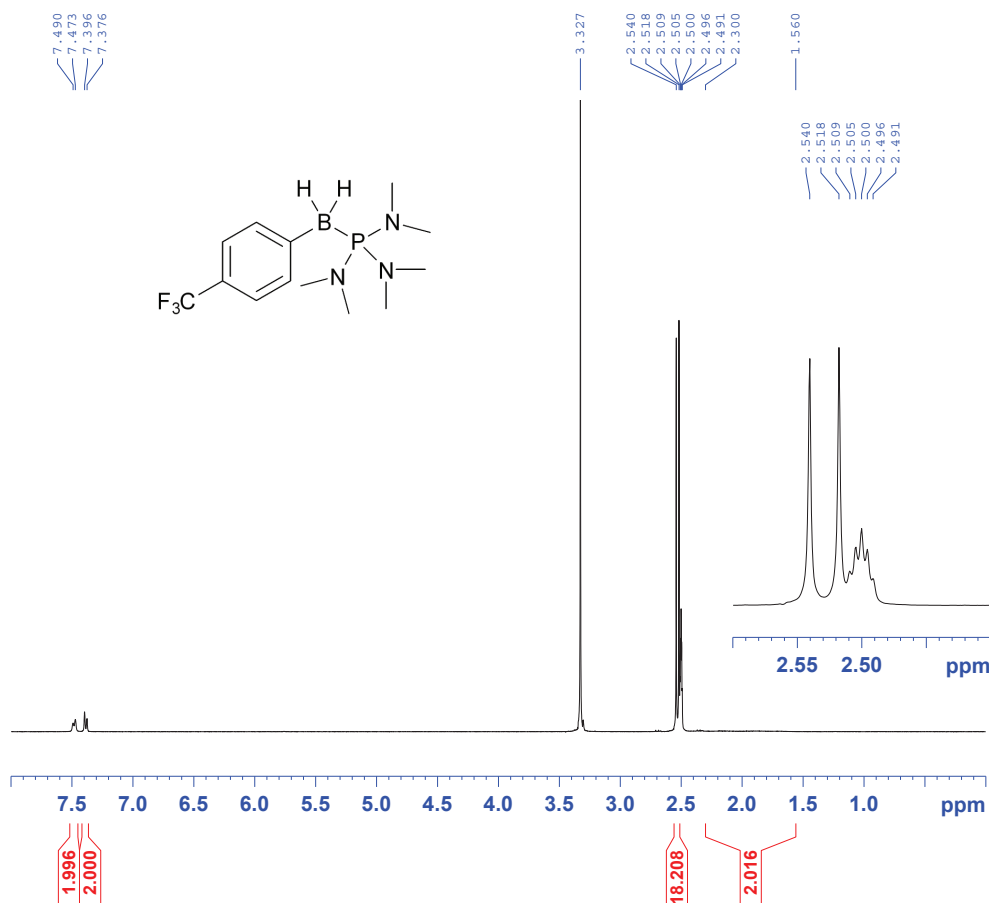4CF<sub>3</sub>PhBH<sub>2</sub>P(NMe<sub>2</sub>)<sub>3</sub>

## IBB-nmr Analysis

NAME July18-2022  
 EXPNO 7  
 PROCNO 1  
 Date\_ 20220718  
 Time 15.23  
 INSTRUM av500  
 PROBHD 5 mm CPDCH 13C  
 PULPROG zgpg30  
 TD 65536  
 SOLVENT DMSO  
 NS 4096  
 DS 4  
 SWH 30030.029 Hz  
 FIDRES 0.458222 Hz  
 AQ 1.0912410 sec  
 RG 90.5  
 DW 16.650 usec  
 DE 20.00 usec  
 TE 298.0 K  
 D1 2.00000000 sec  
 D11 0.03000000 sec  
 TD0 1

===== CHANNEL f1 =====  
 NUC1 13C  
 P1 10.00 usec  
 PL1 -5.00 dB  
 PL1W 14.29790783 W  
 SFO1 125.7703643 MHz

===== CHANNEL f2 =====  
 CPDPRG2 waltz16  
 NUC2 1H  
 PCPD2 80.00 usec  
 PL2 -4.00 dB  
 PL12 14.06 dB  
 PL13 17.00 dB  
 PL2W 6.30957365 W  
 PL12W 0.09862794 W  
 PL13W 0.05011872 W  
 SFO2 500.1320005 MHz  
 SI 32768  
 SF 125.7577857 MHz  
 WDW EM  
 SSB 0  
 LB 1.00 Hz  
 GB 0  
 PC 0.30

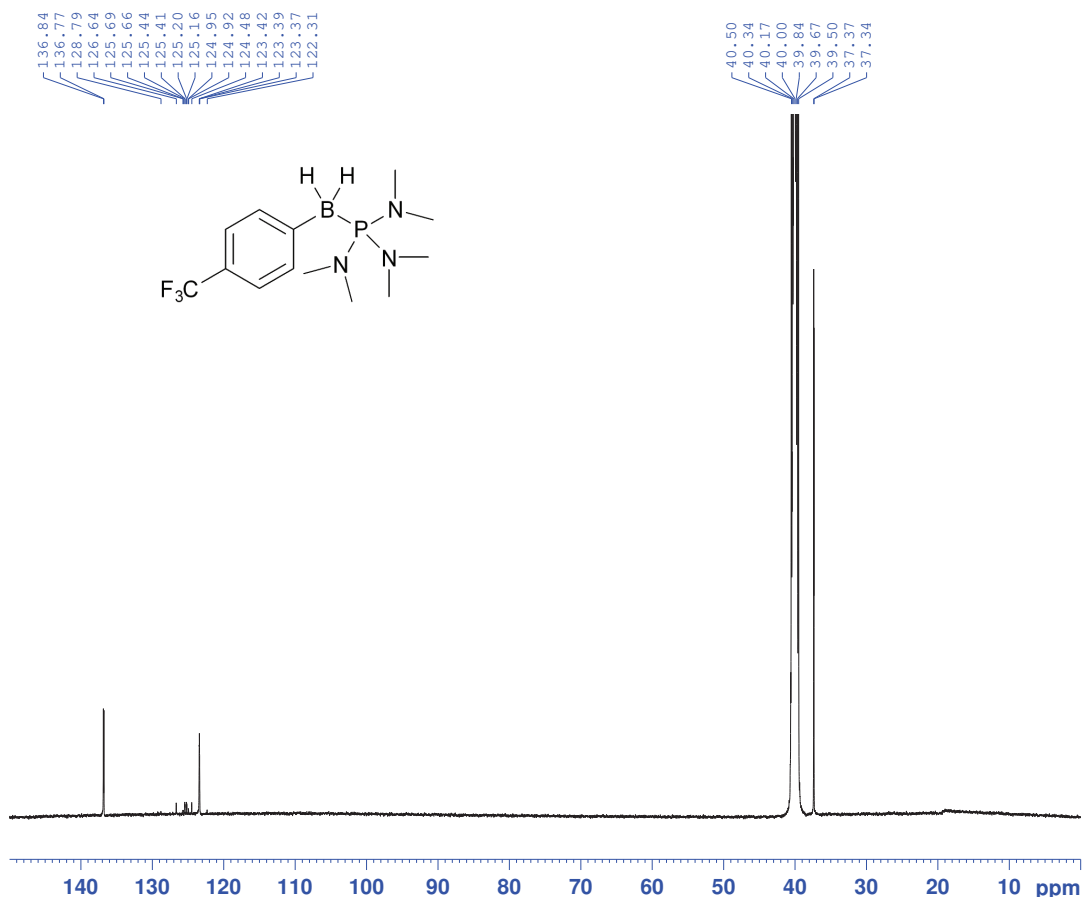

4CF3PhBH2P (NMe2) 3

## IBB-nmr Analysis

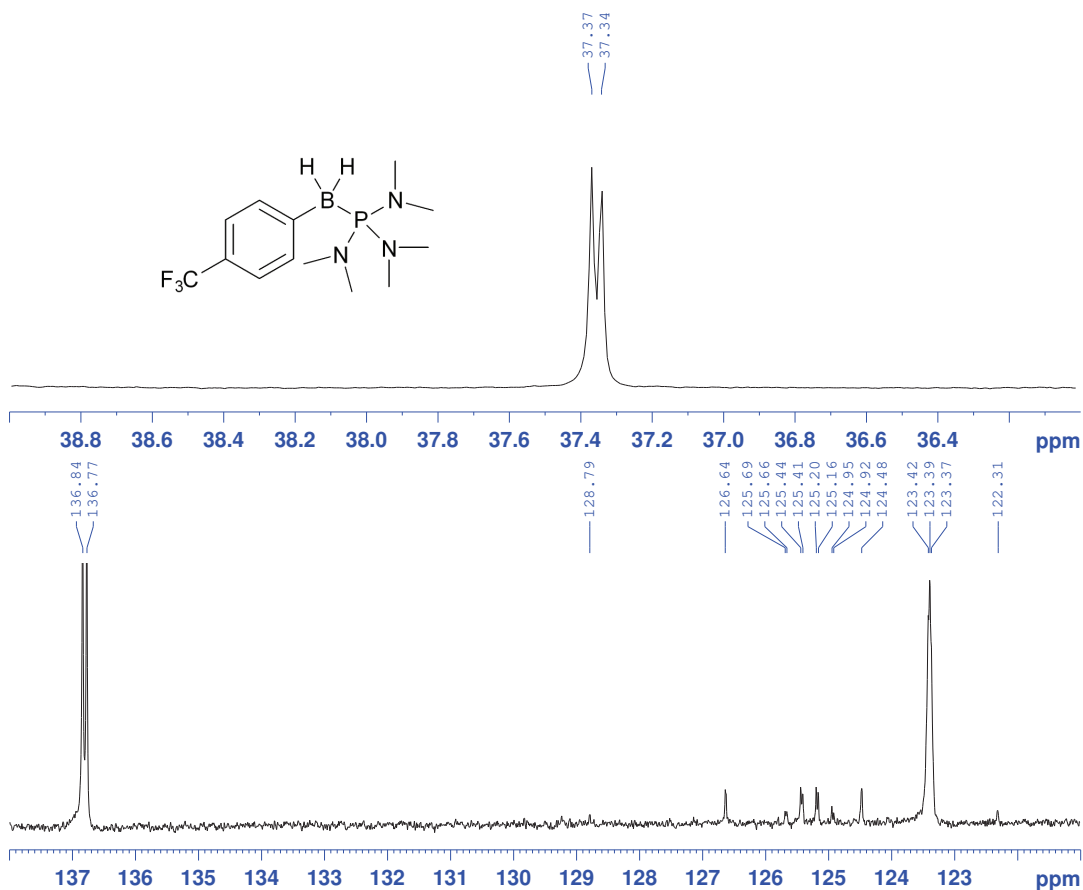

NAME July18-2022  
 EXPNO 7  
 PROCNO 1  
 Date\_ 20220718  
 Time 15.23  
 INSTRUM av500  
 PROBHD 5 mm CPDCH 13C  
 PULPROG zgpg30  
 TD 65536  
 SOLVENT DMSO  
 NS 4096  
 DS 4  
 SWH 30030.029 Hz  
 FIDRES 0.458222 Hz  
 AQ 1.0912410 sec  
 RG 90.5  
 DW 16.650 usec  
 DE 20.00 usec  
 TE 298.0 K  
 D1 2.00000000 sec  
 D11 0.03000000 sec  
 TD0 1

===== CHANNEL f1 =====  
 NUC1 13C  
 P1 10.00 usec  
 PL1 -5.00 dB  
 PL1W 14.29790783 W  
 SFO1 125.7703643 MHz

===== CHANNEL f2 =====  
 CPDPRG2 waltz16  
 NUC2 1H  
 PCPD2 80.00 usec  
 PL2 -4.00 dB  
 PL12 14.06 dB  
 PL13 17.00 dB  
 PL2W 6.30957365 W  
 PL12W 0.09862794 W  
 PL13W 0.05011872 W  
 SFO2 500.1320005 MHz  
 SI 32768  
 SF 125.7577857 MHz  
 WDW EM  
 SSB 0  
 LB 1.00 Hz  
 GB 0  
 PC 0.30

4CF3PhBH2P (NMe2) 3

## IBB-nmr Analysis

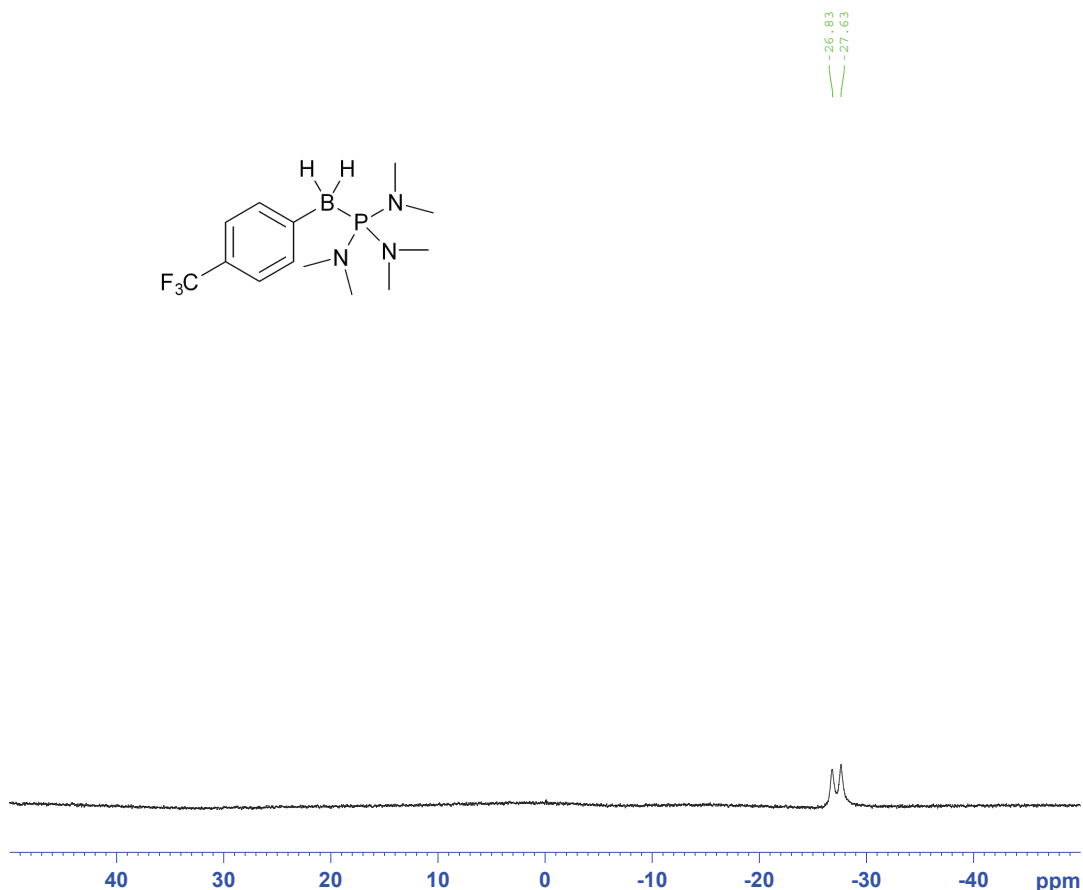

NAME July17-2022  
 EXPNO 3  
 PROCNO 1  
 Date\_ 20220717  
 Time 18.08  
 INSTRUM av400  
 PROBHD 5 mm PABBO BB-  
 PULPROG zgig  
 TD 32768  
 SOLVENT DMSO  
 NS 128  
 DS 4  
 SWH 20000.000 Hz  
 FIDRES 0.610352 Hz  
 AQ 0.8192500 sec  
 RG 203  
 DW 25.000 usec  
 DE 20.00 usec  
 TE 297.6 K  
 D1 1.00000000 sec  
 D11 0.03000000 sec  
 TD0 1

===== CHANNEL f1 =====  
 NUC1 11B  
 P1 6.30 usec  
 PL1 -2.00 dB  
 SFO1 128.3776050 MHz

===== CHANNEL f2 =====  
 CPDPRG2 waltz16  
 NUC2 1H  
 PCPD2 80.00 usec  
 PL2 -1.70 dB  
 PL12 13.80 dB  
 PL2W 14.48987389 W  
 PL12W 0.40838012 W  
 SFO2 400.1316005 MHz  
 SI 32768  
 SF 128.3776183 MHz  
 WDW EM  
 SSB 0  
 LB 2.00 Hz  
 GB 0  
 PC 1.40

4CF<sub>3</sub>PhBH<sub>2</sub>P(NMe<sub>2</sub>)<sub>3</sub>

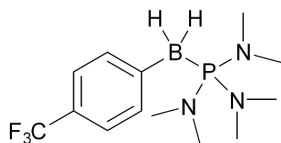

-60.60  
-60.61

## IBB-nmr Analysis

```
NAME      July17-2022
EXPNO     2
PROCNO    1
Date_     20220717
Time      18.01
INSTRUM   av400
PROBHD    5 mm PABBO BB-
PULPROG   zgfhigqn
TD        131072
SOLVENT   DMSO
NS         8
DS         4
SWH        89285.711 Hz
FIDRES     0.681196 Hz
AQ         0.7340532 sec
RG         203
DW         5.600 usec
DE         6.50 usec
TE         297.1 K
D1         1.00000000 sec
D11        0.03000000 sec
D12        0.00002000 sec
TD0        1
```

```
===== CHANNEL f1 =====
NUC1       19F
P1         19.50 usec
PL1        -4.00 dB
PL1W       16.40489006 W
SFO1       376.4607164 MHz
```

```
===== CHANNEL f2 =====
CPDPRG2    waltz16
NUC2        1H
PCPD2      112.00 usec
PL2         -4.00 dB
PL12        18.00 dB
PL2W       24.60733604 W
PL12W      0.15526180 W
SFO2       400.1316005 MHz
SI          65536
SF         376.4984617 MHz
WDW         EM
SSB         0
LB          0.30 Hz
GB          0
PC          1.00
```

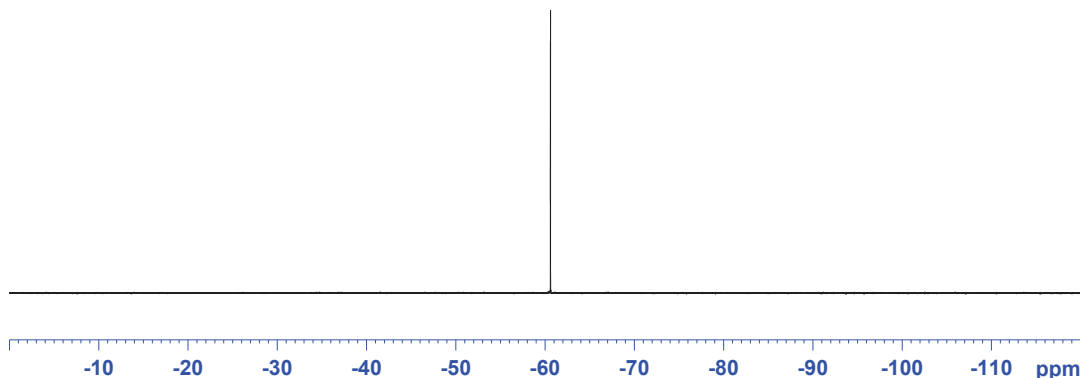

4CF<sub>3</sub>PhBH<sub>2</sub>P(NMe<sub>2</sub>)<sub>3</sub>

92.49

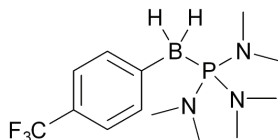

## IBB-nmr Analysis

```
NAME      July17-2022
EXPNO     5
PROCNO    1
Date_     20220717
Time      18.18
INSTRUM   av400
PROBHD    5 mm PABBO BB-
PULPROG   zg30
TD        65536
SOLVENT   DMSO
NS         128
DS         4
SWH        64102.563 Hz
FIDRES     0.978127 Hz
AQ         0.5112308 sec
RG         203
DW         7.800 usec
DE         6.50 usec
TE         297.1 K
D1         2.00000000 sec
TD0        1
```

```
===== CHANNEL f1 =====
NUC1       31P
P1         10.00 usec
PL1         -0.70 dB
PL1W       30.10233498 W
SFO1       161.9674942 MHz
SI         32768
SF         161.9754962 MHz
WDW         EM
SSB         0
LB          1.00 Hz
GB          0
PC          1.40
```

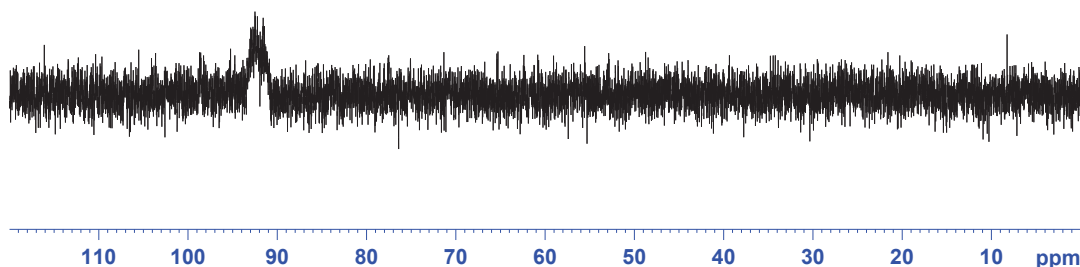

Supplement: s1 [file s1]
